# Supplementary material for: Post-acute Sequelae of SARS-CoV2: A Narrative Review and Meta-Analysis of Individual Symptom Frequencies
Source: Preprints.org preprint supplement (doi:10.20944/preprints202403.1309.v1), 2024-03-26
Supplement: Supplementary file 1 [file supplementary]

# Meta Analysis

ak1017

2023-09-28

- Analysis 1, stratified by Survey, Long COVID, EHR
  - Fatigue:
  - Fever Chills Sweats Or Flushing:
  - Post Exertional Malaise:
  - Cardiac Symptoms Including Chest Pain:
  - Persistant Cough:
  - Shortness Of Breath:
  - Sleep Problems:
  - Problems Thinking Or Concentrating:
  - Dizziness:
  - Headache:
  - Nerve Problems Seizures:
  - Loss Of Or Change In Smell Or Taste:
  - Mental Health Concerns:
  - Joint Muscle Pain:
  - Weakness In Arms Or Legs:
  - Gi Symptoms Including Abdominal Pain:
  - Urinary Symptoms:
  - Hair Loss:
  - Skin Rash:
  - Hearing Problems:
  - Vision Problems:
- Analysis 2, stratified by Risk of Bias High, Risk of Bias Moderate, Risk of Bias Low
  - Fatigue:
  - Fever Chills Sweats Or Flushing:
  - Post Exertional Malaise:
  - Cardiac Symptoms Including Chest Pain:
  - Persistant Cough:
  - Shortness Of Breath:
  - Sleep Problems:
  - Problems Thinking Or Concentrating:
  - Dizziness:
  - Headache:
  - Nerve Problems Seizures:
  - Loss Of Or Change In Smell Or Taste:
  - Mental Health Concerns:
  - Joint Muscle Pain:
  - Weakness In Arms Or Legs:
  - Gi Symptoms Including Abdominal Pain:
  - Urinary Symptoms:
  - Hair Loss:
  - Skin Rash:
  - Hearing Problems:
  - Vision Problems:
- Analysis 3, stratified by Survey, EHR
  - Fatigue:
  - Fever Chills Sweats Or Flushing:
  - Post Exertional Malaise:
  - Cardiac Symptoms Including Chest Pain:
  - Persistant Cough:
  - Shortness Of Breath:
  - Sleep Problems:
  - Problems Thinking Or Concentrating:
  - Dizziness:
  - Headache:
  - Nerve Problems Seizures:

- Loss Of Or Change In Smell Or Taste:
- Mental Health Concerns:
- Joint Muscle Pain:
- Weakness In Arms Or Legs:
- Gi Symptoms Including Abdominal Pain:
- Urinary Symptoms:
- Hair Loss:
- Skin Rash:
- Hearing Problems:
- Vision Problems:
- Analysis 4, stratified by hospitalized, non-hospitalized and mixed
  - Fatigue:
  - Fever Chills Sweats Or Flushing:
  - Post Exertional Malaise:
  - Cardiac Symptoms Including Chest Pain:
  - Persistant Cough:
  - Shortness Of Breath:
  - Sleep Problems:
  - Problems Thinking Or Concentrating:
  - Dizziness:
  - Headache:
  - Nerve Problems Seizures:
  - Loss Of Or Change In Smell Or Taste:
  - Mental Health Concerns:
  - Joint Muscle Pain:
  - Weakness In Arms Or Legs:
  - Gi Symptoms Including Abdominal Pain:
  - Urinary Symptoms:
  - Hair Loss:
  - Skin Rash:
  - Hearing Problems:
  - Vision Problems:

# Analysis 1, stratified by Survey, Long COVID, EHR

Fatigue:

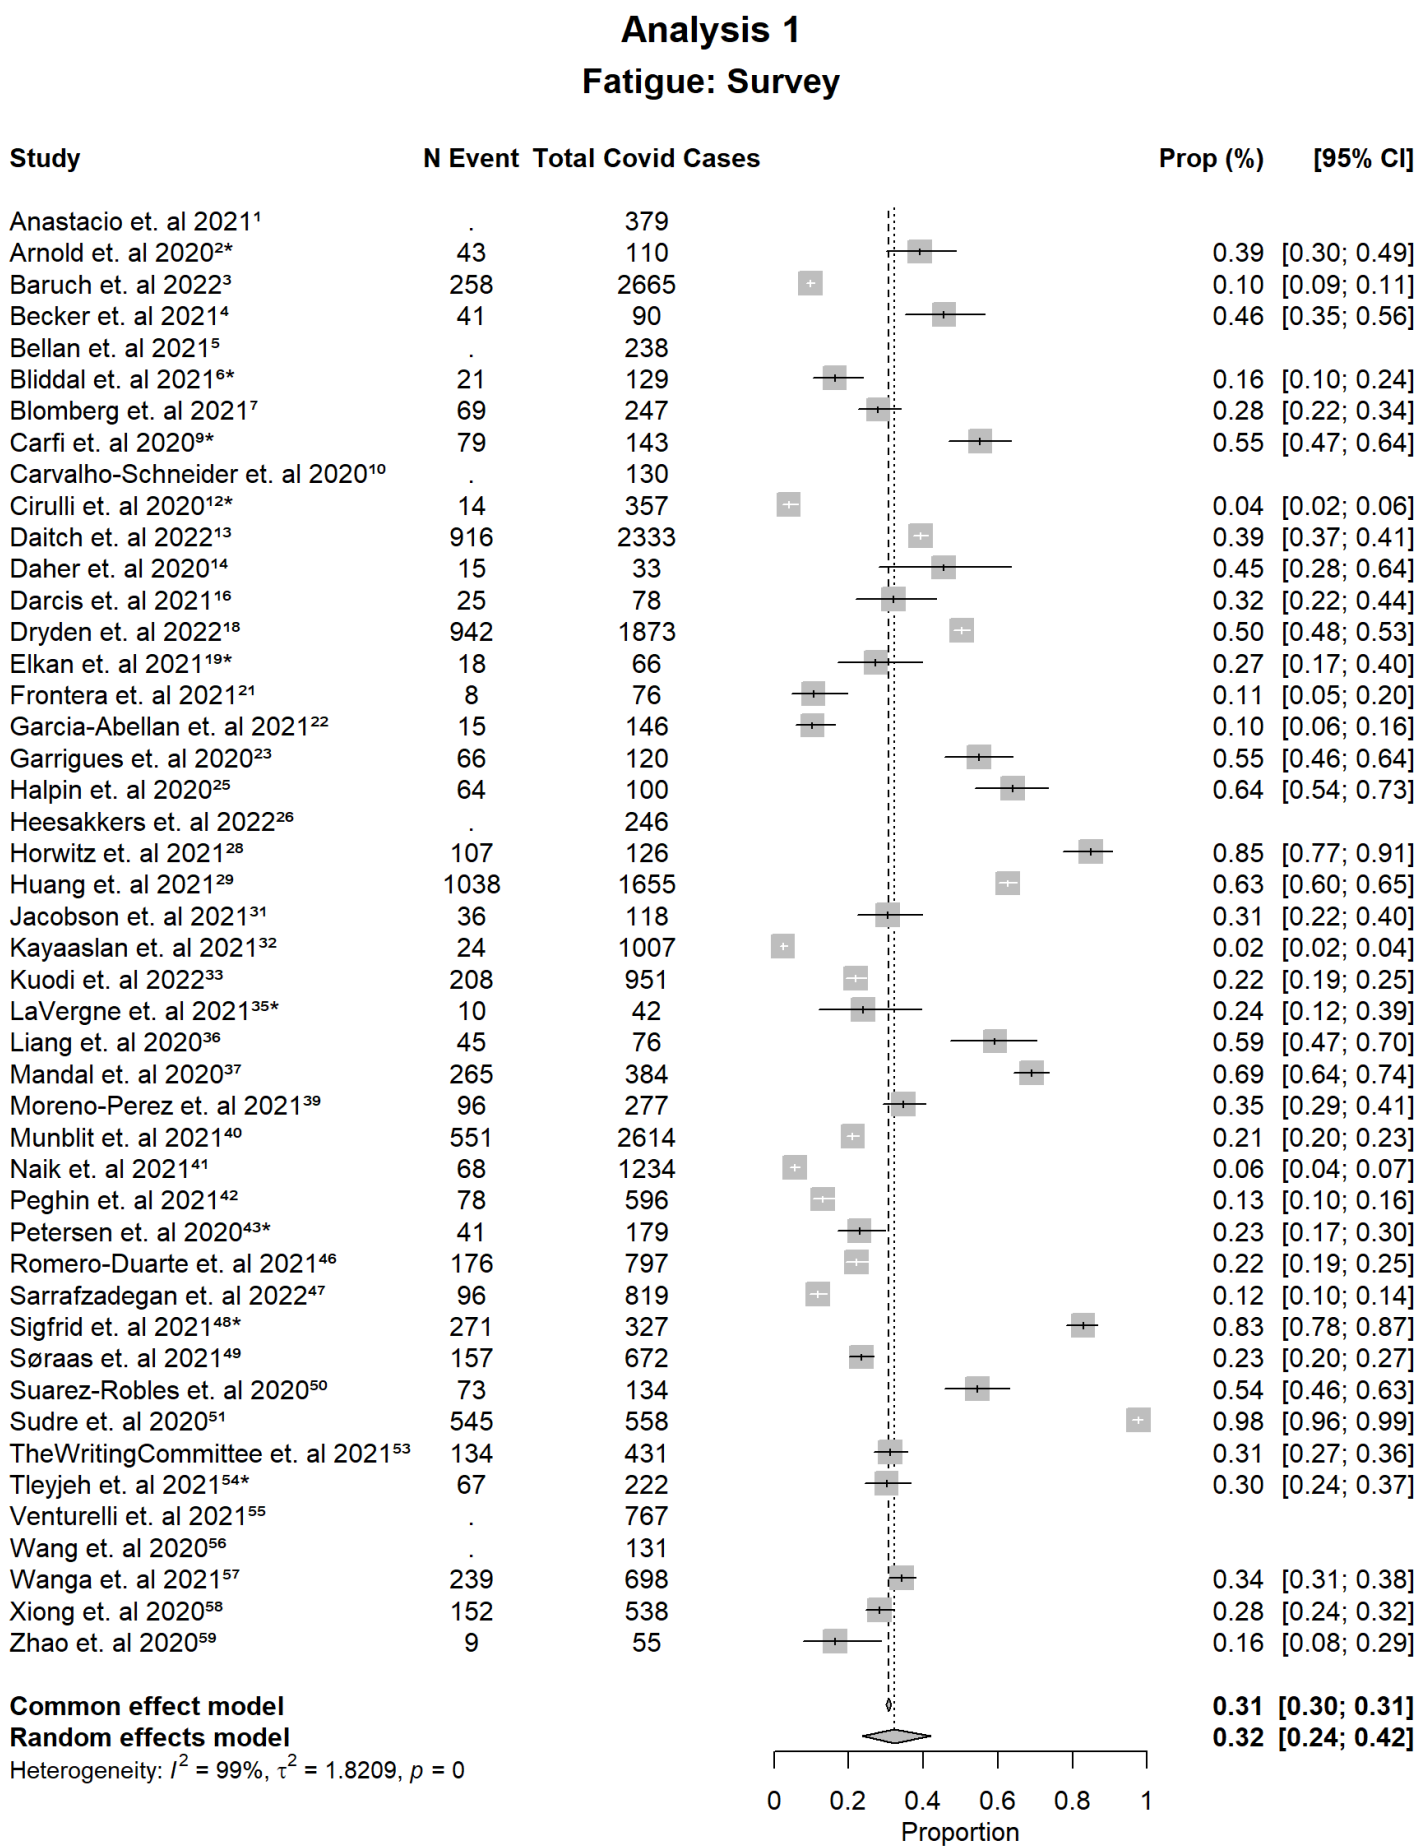

\* indicates value estimated from a figure

Analysis 1  
Fatigue: Long COVID

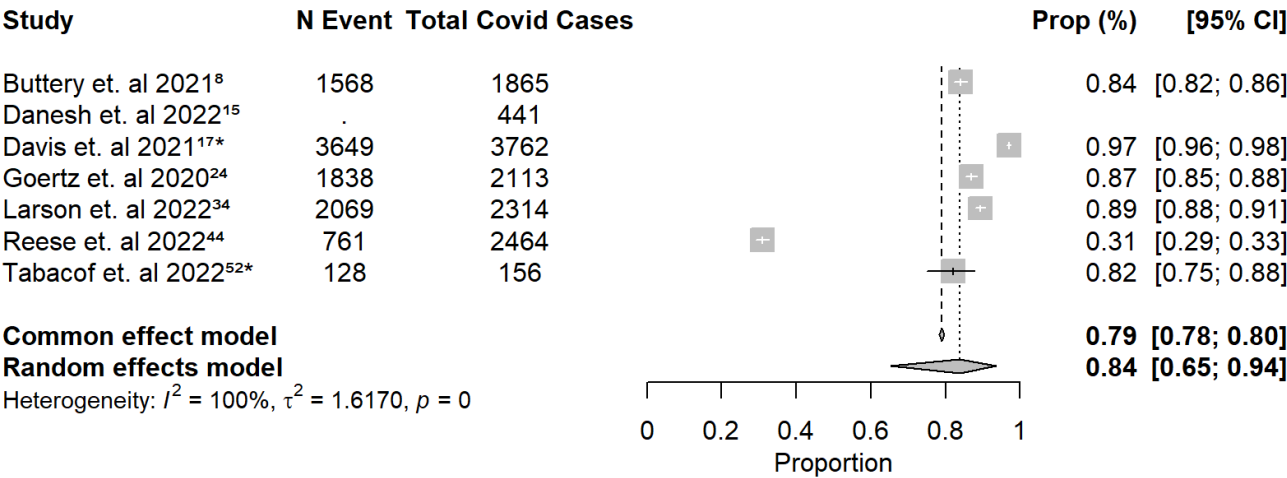

\* indicates value estimated from a figure



Analysis 1  
Fatigue: EHR

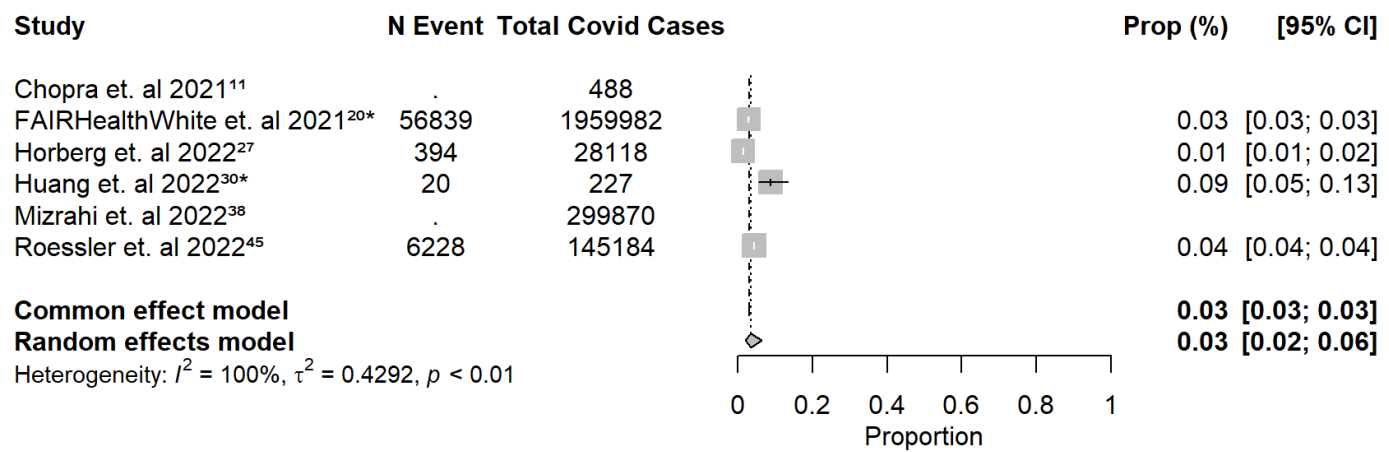

\* indicates value estimated from a figure

# Fever Chills Sweats Or Flushing:

## Analysis 1 Fever Chills Sweats Or Flushing: Survey

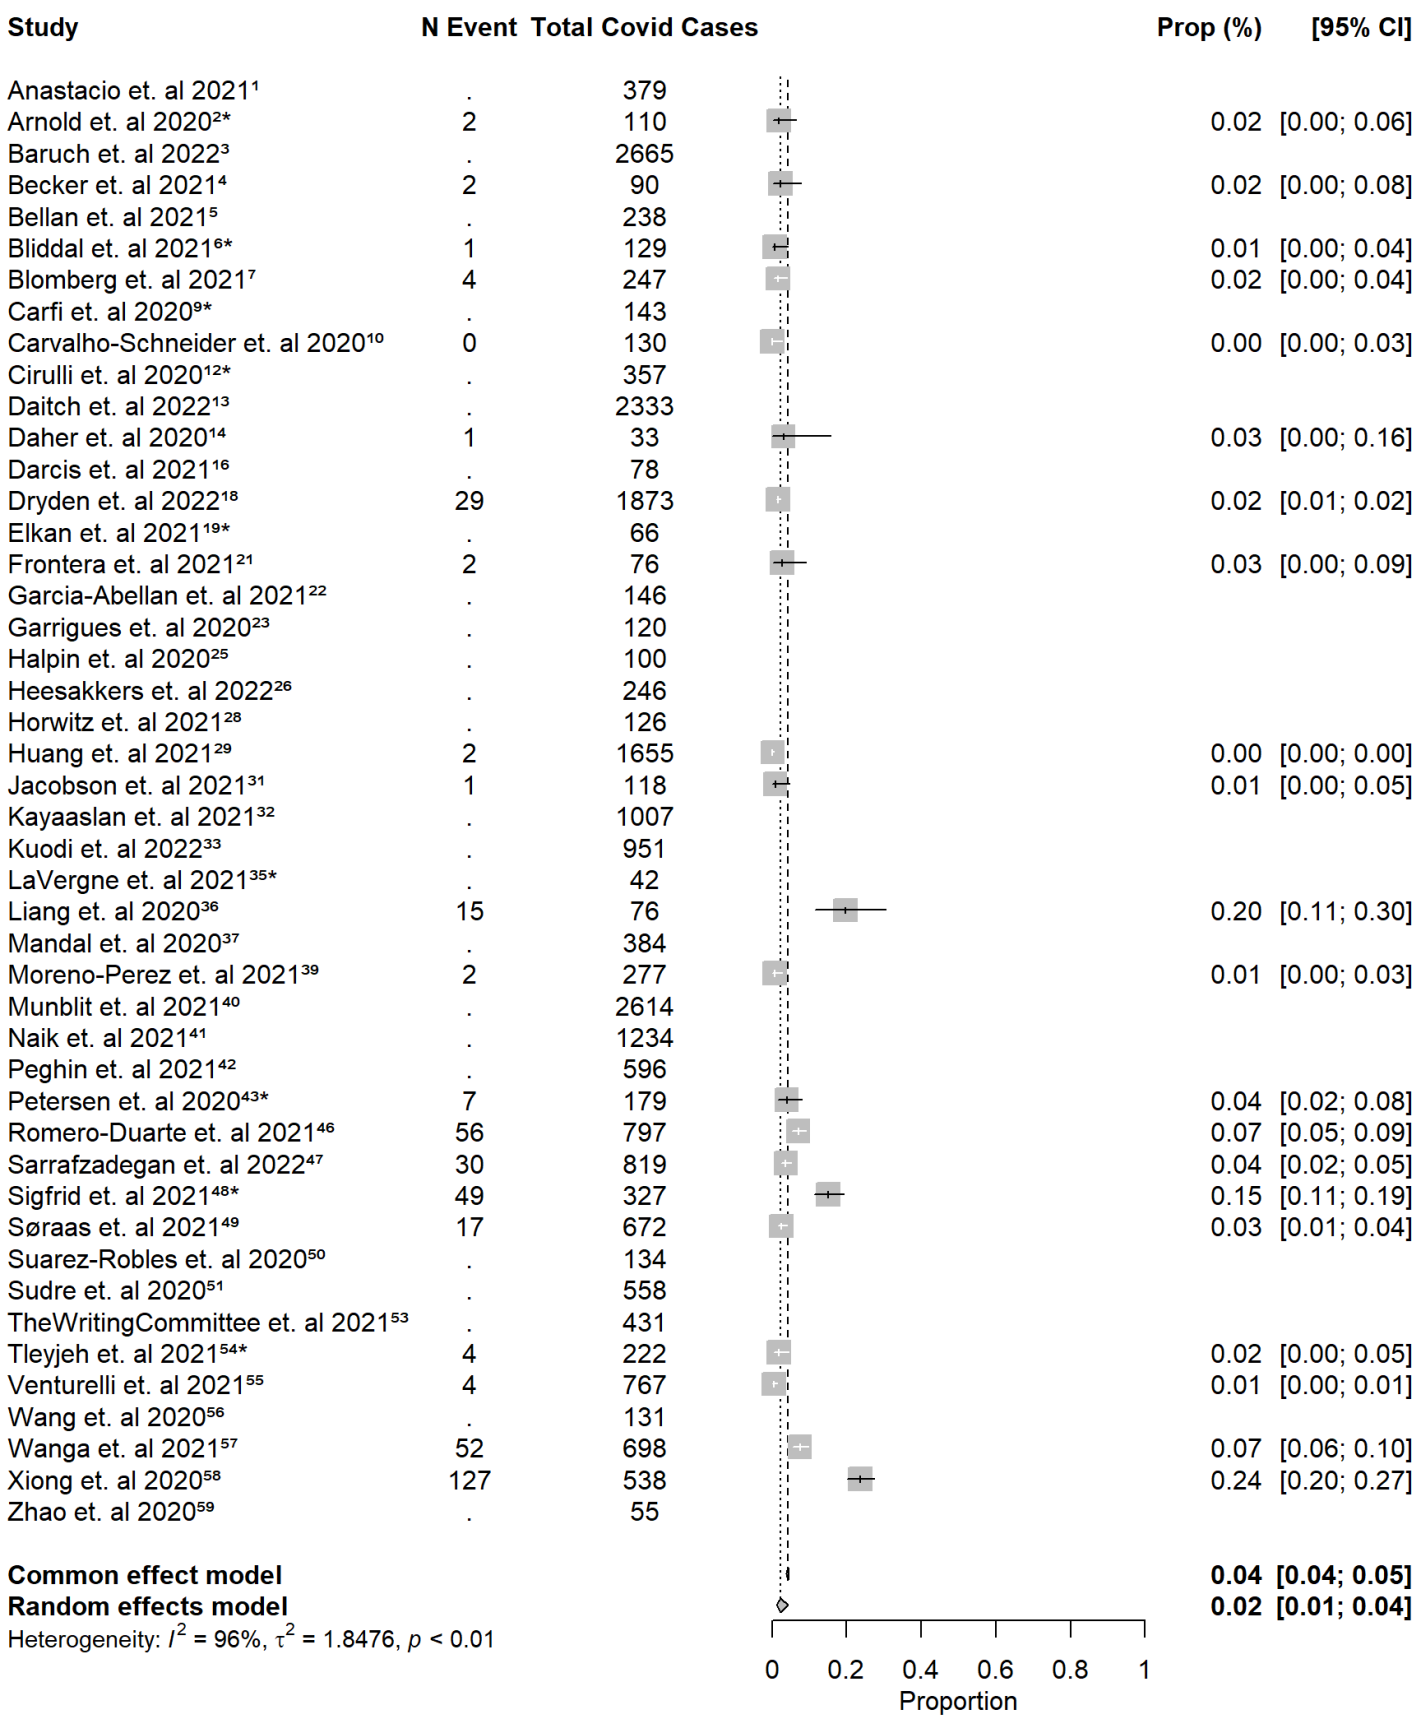

\* indicates value estimated from a figure

Analysis 1  
Fever Chills Sweats Or Flushing: Long COVID

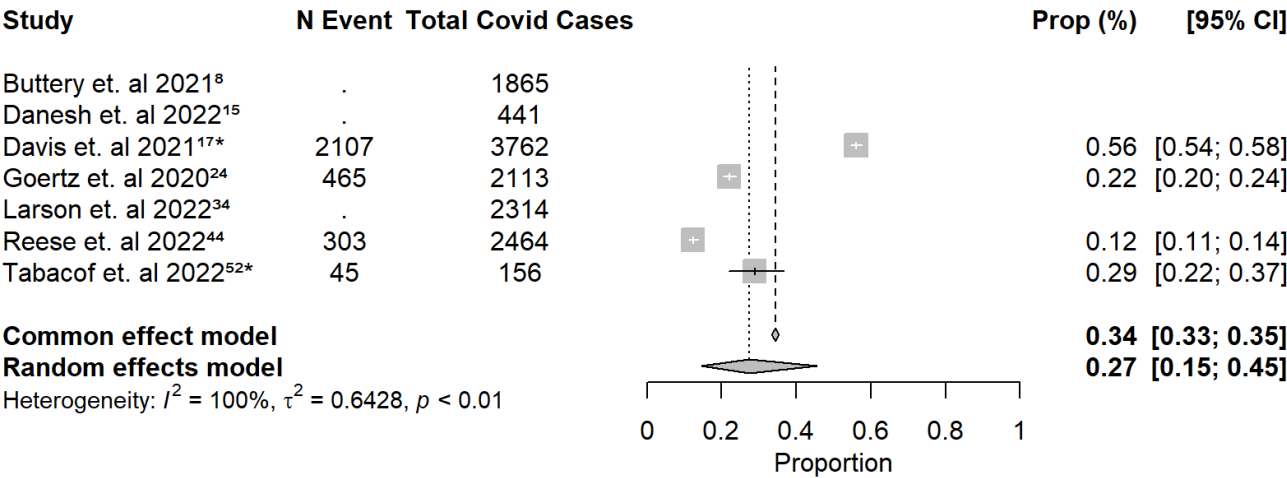

\* indicates value estimated from a figure

Analysis 1  
Fever Chills Sweats Or Flushing: EHR

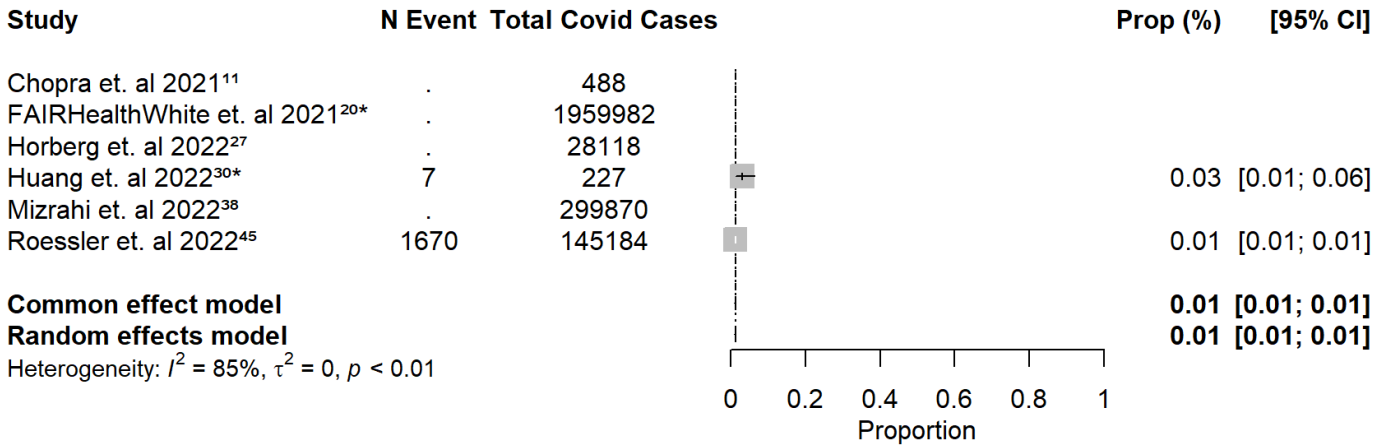

\* indicates value estimated from a figure

Post Exertional Malaise:

Analysis 1  
Post Exertional Malaise: Survey

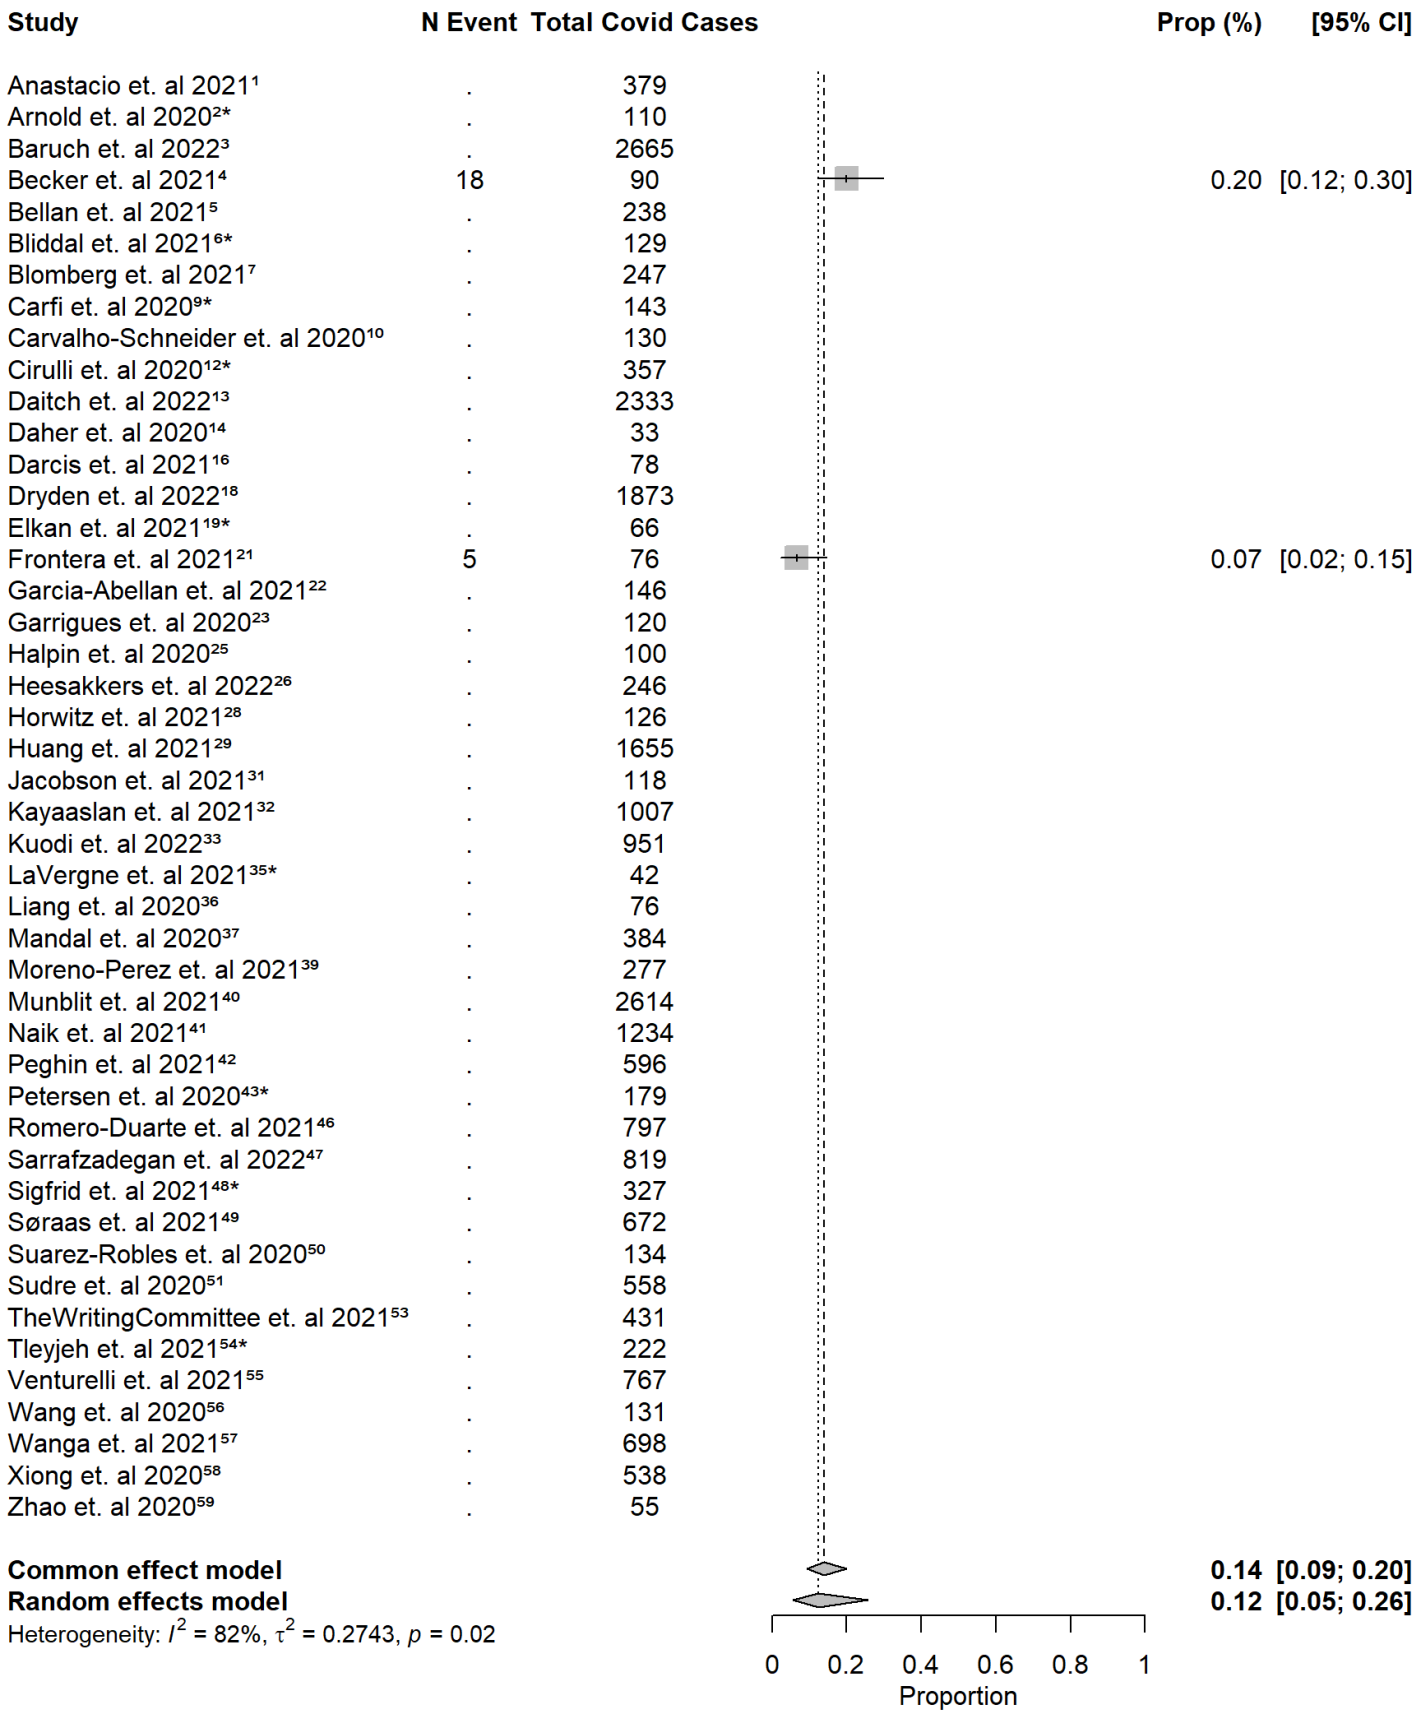

\* indicates value estimated from a figure

Analysis 1  
Post Exertional Malaise: Long COVID

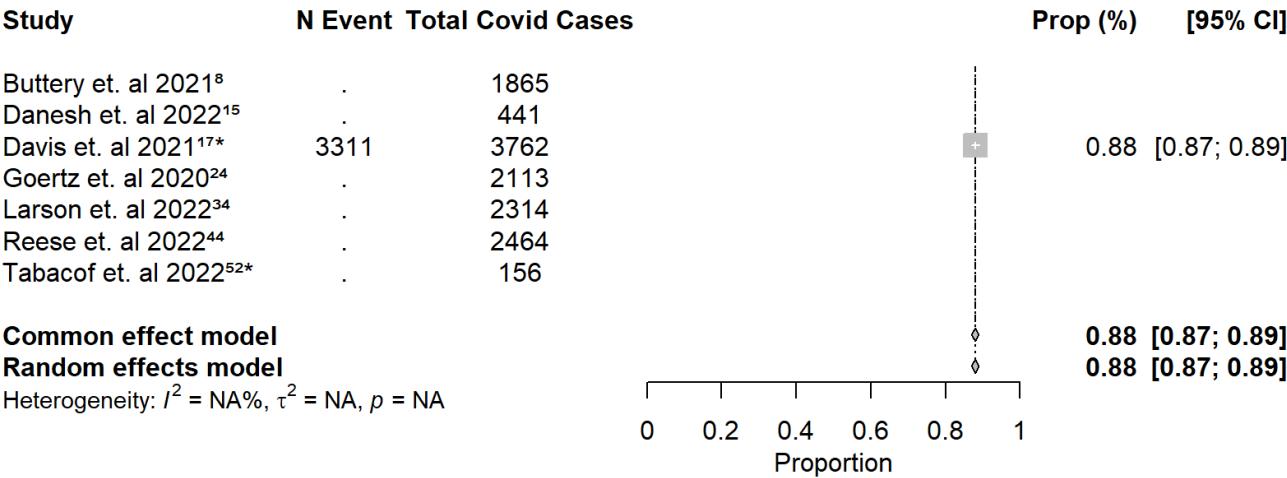

\* indicates value estimated from a figure

# Cardiac Symptoms Including Chest Pain:

## Analysis 1 Cardiac Symptoms Including Chest Pain: Survey

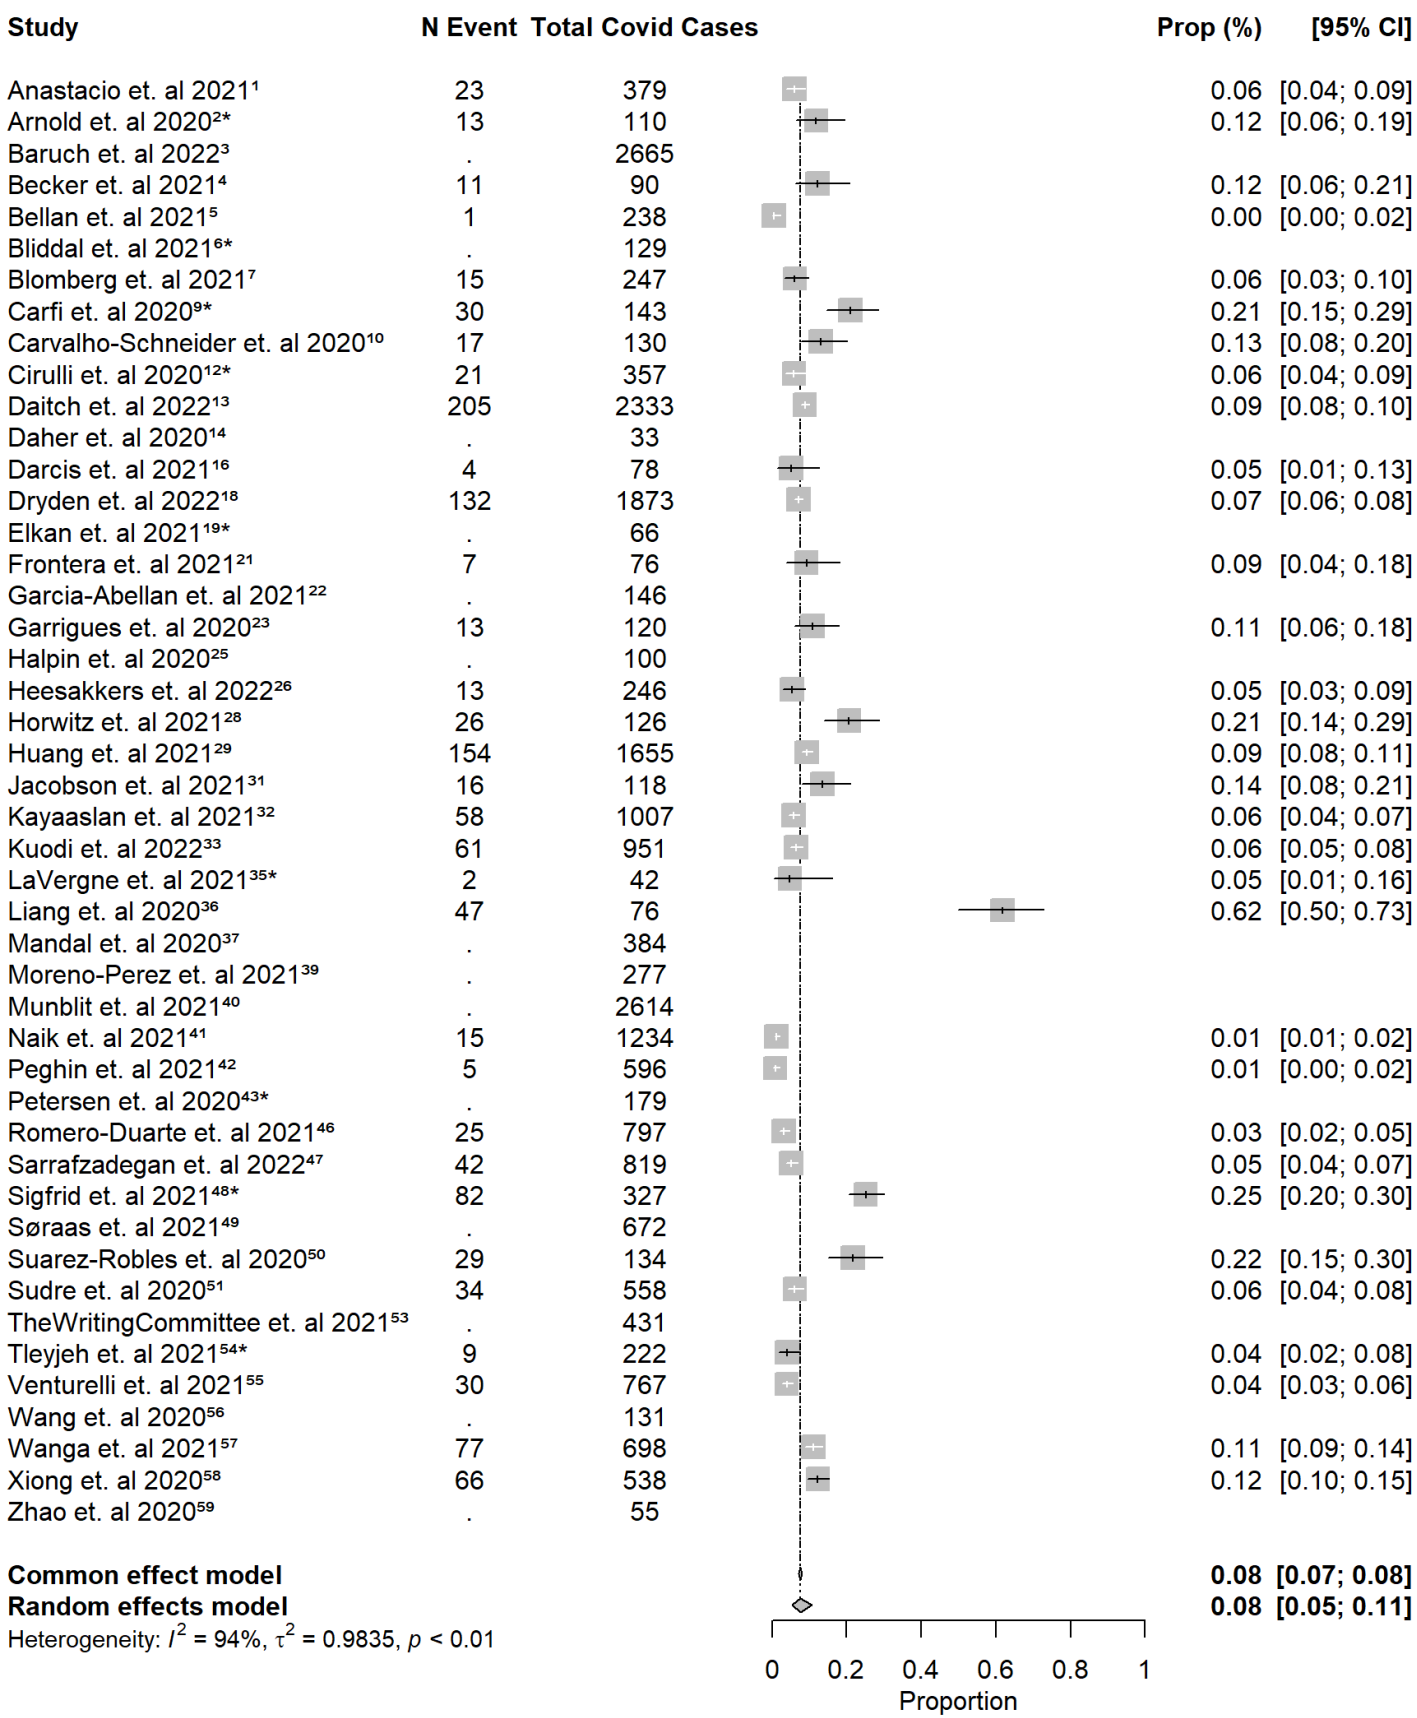

\* indicates value estimated from a figure

Analysis 1

Cardiac Symptoms Including Chest Pain: Long COVID

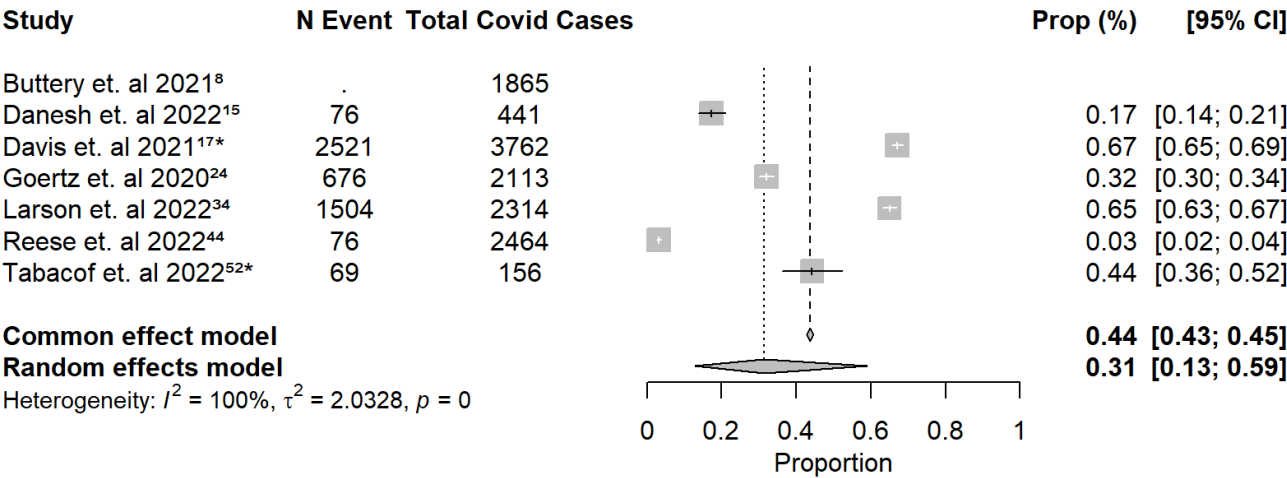

\* indicates value estimated from a figure



Analysis 1  
Cardiac Symptoms Including Chest Pain: EHR

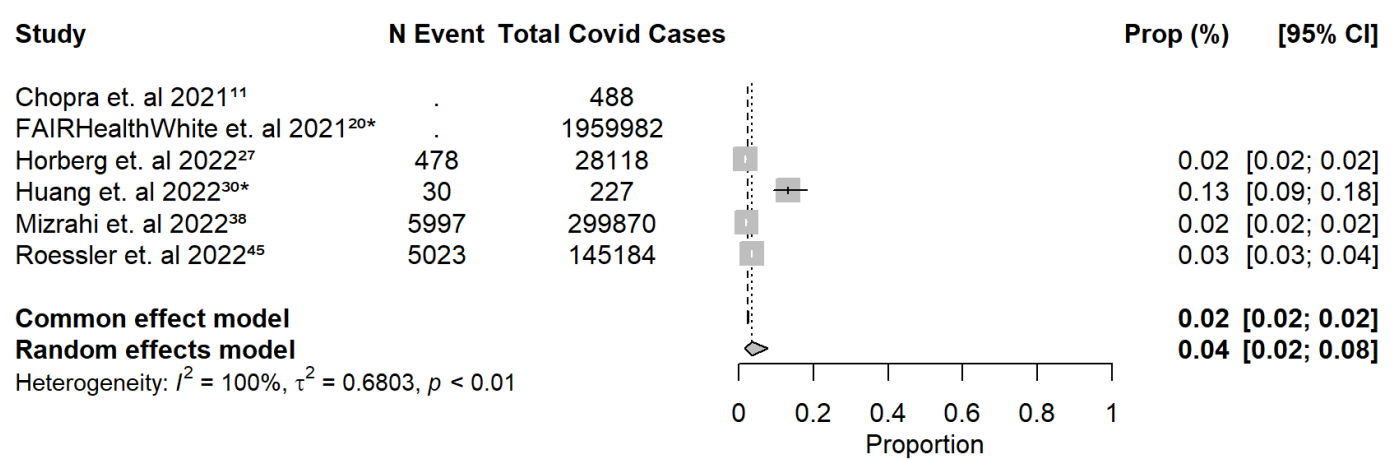

\* indicates value estimated from a figure

Persistant Cough:

Analysis 1  
Persistant Cough: Survey

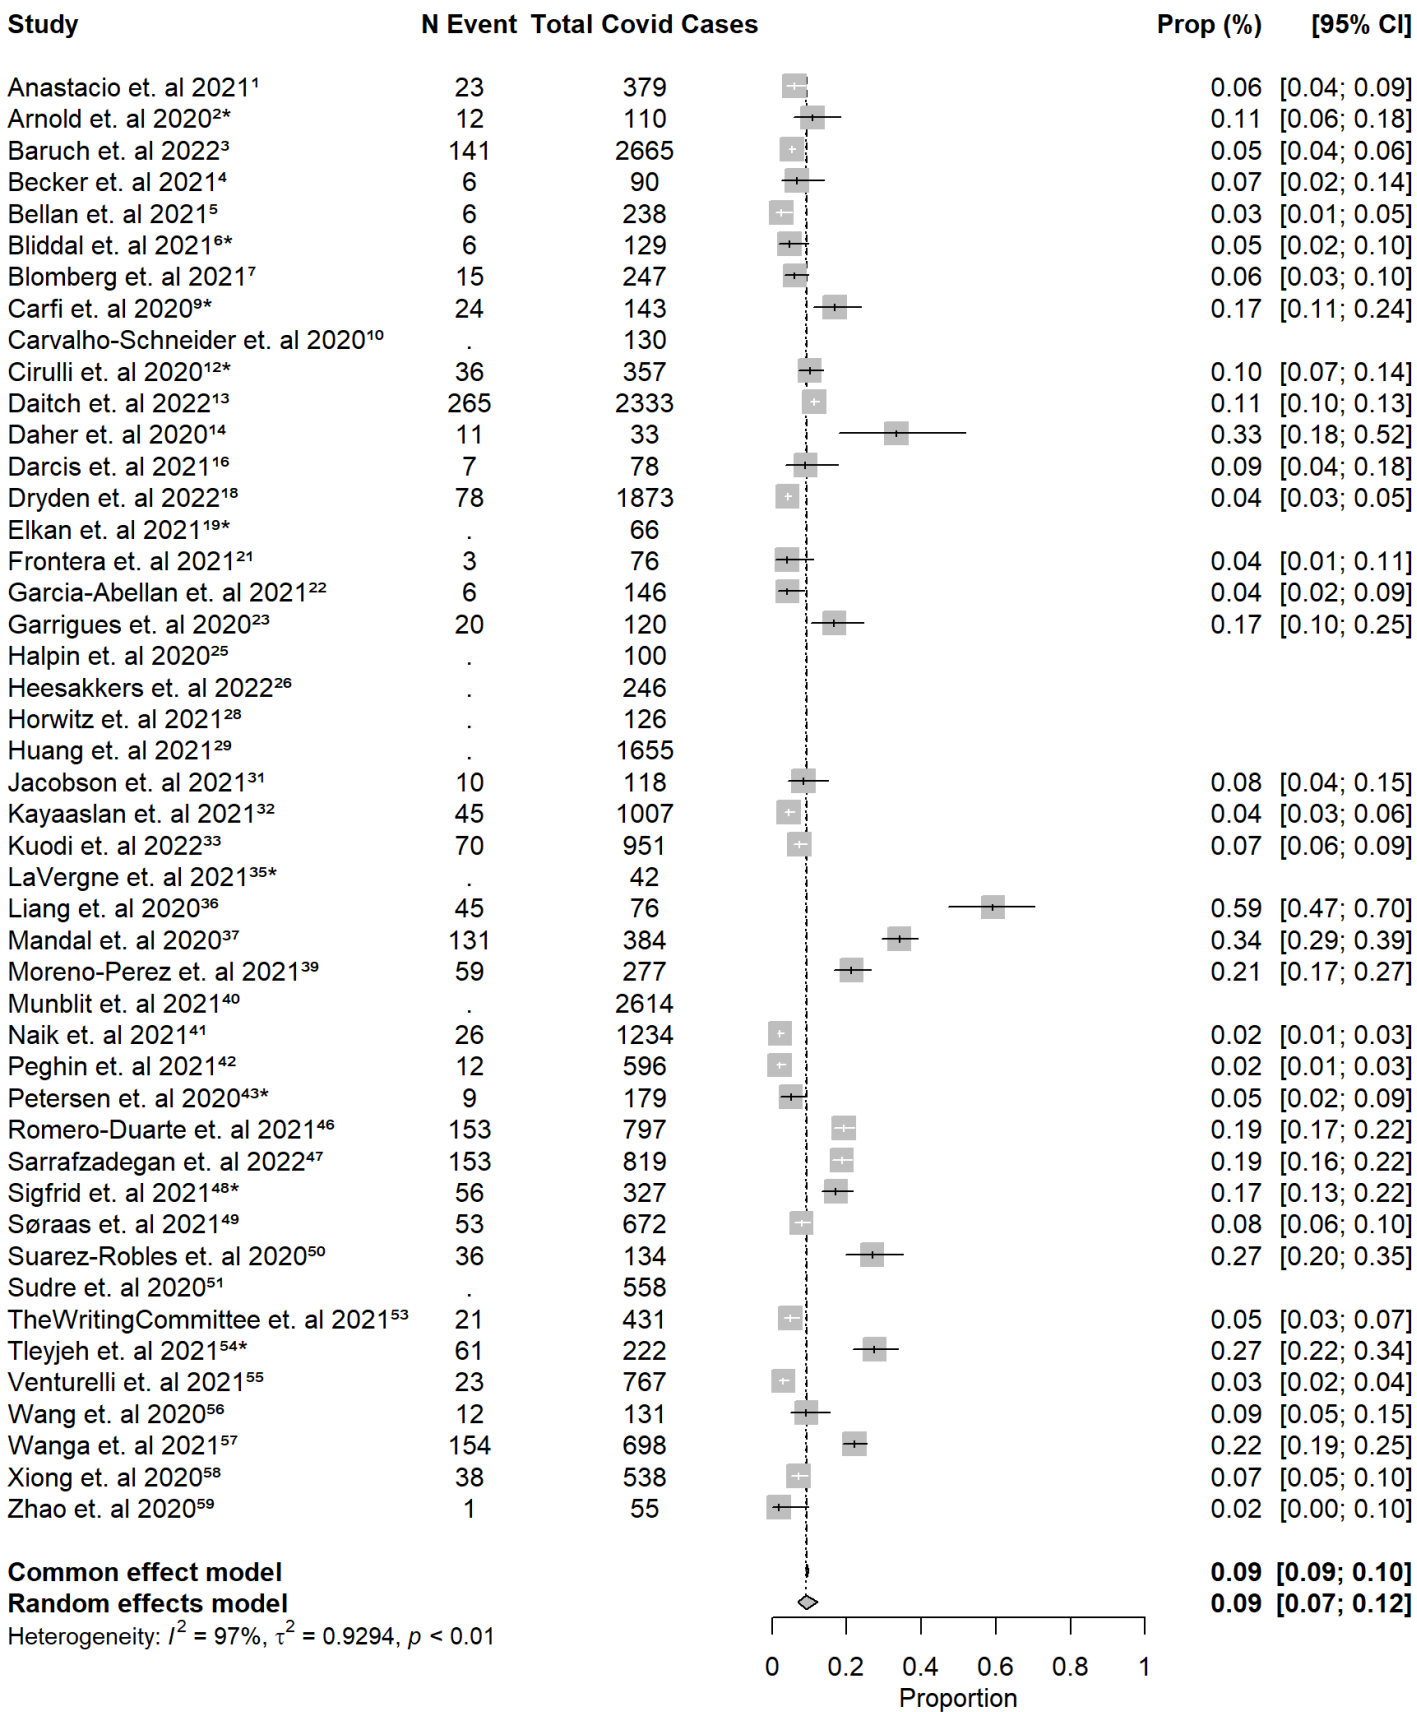

\* indicates value estimated from a figure

Analysis 1  
Persistant Cough: Long COVID

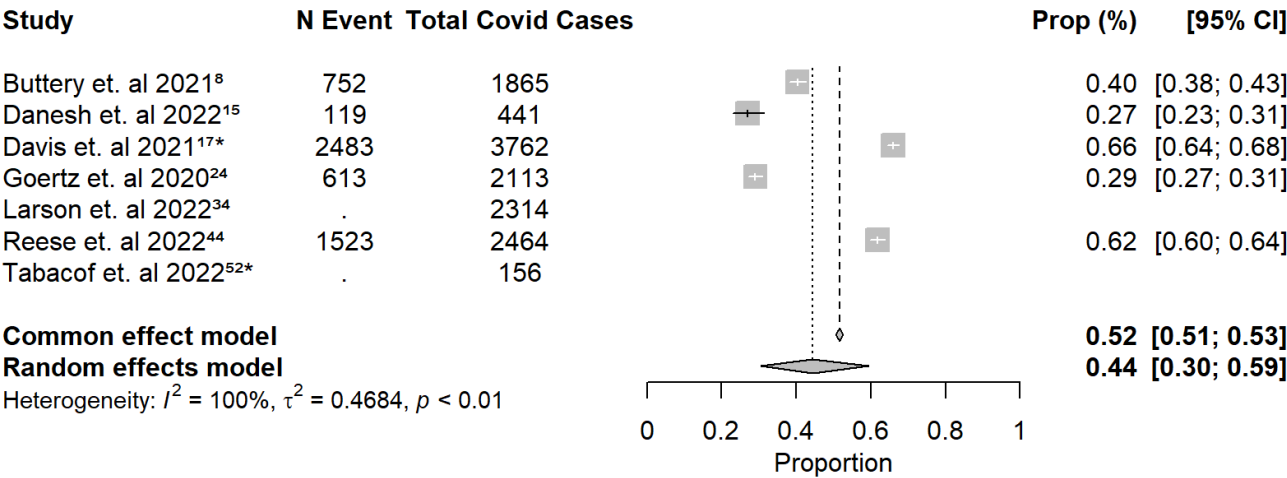

\* indicates value estimated from a figure

Analysis 1  
Persistant Cough: EHR

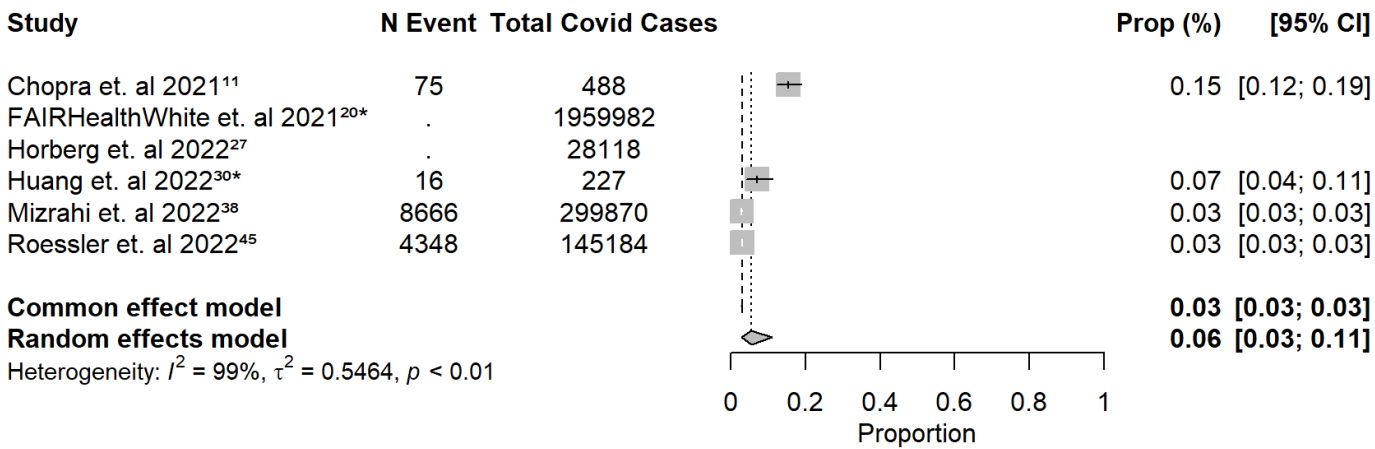

\* indicates value estimated from a figure

# Shortness Of Breath:

## Analysis 1 Shortness Of Breath: Survey

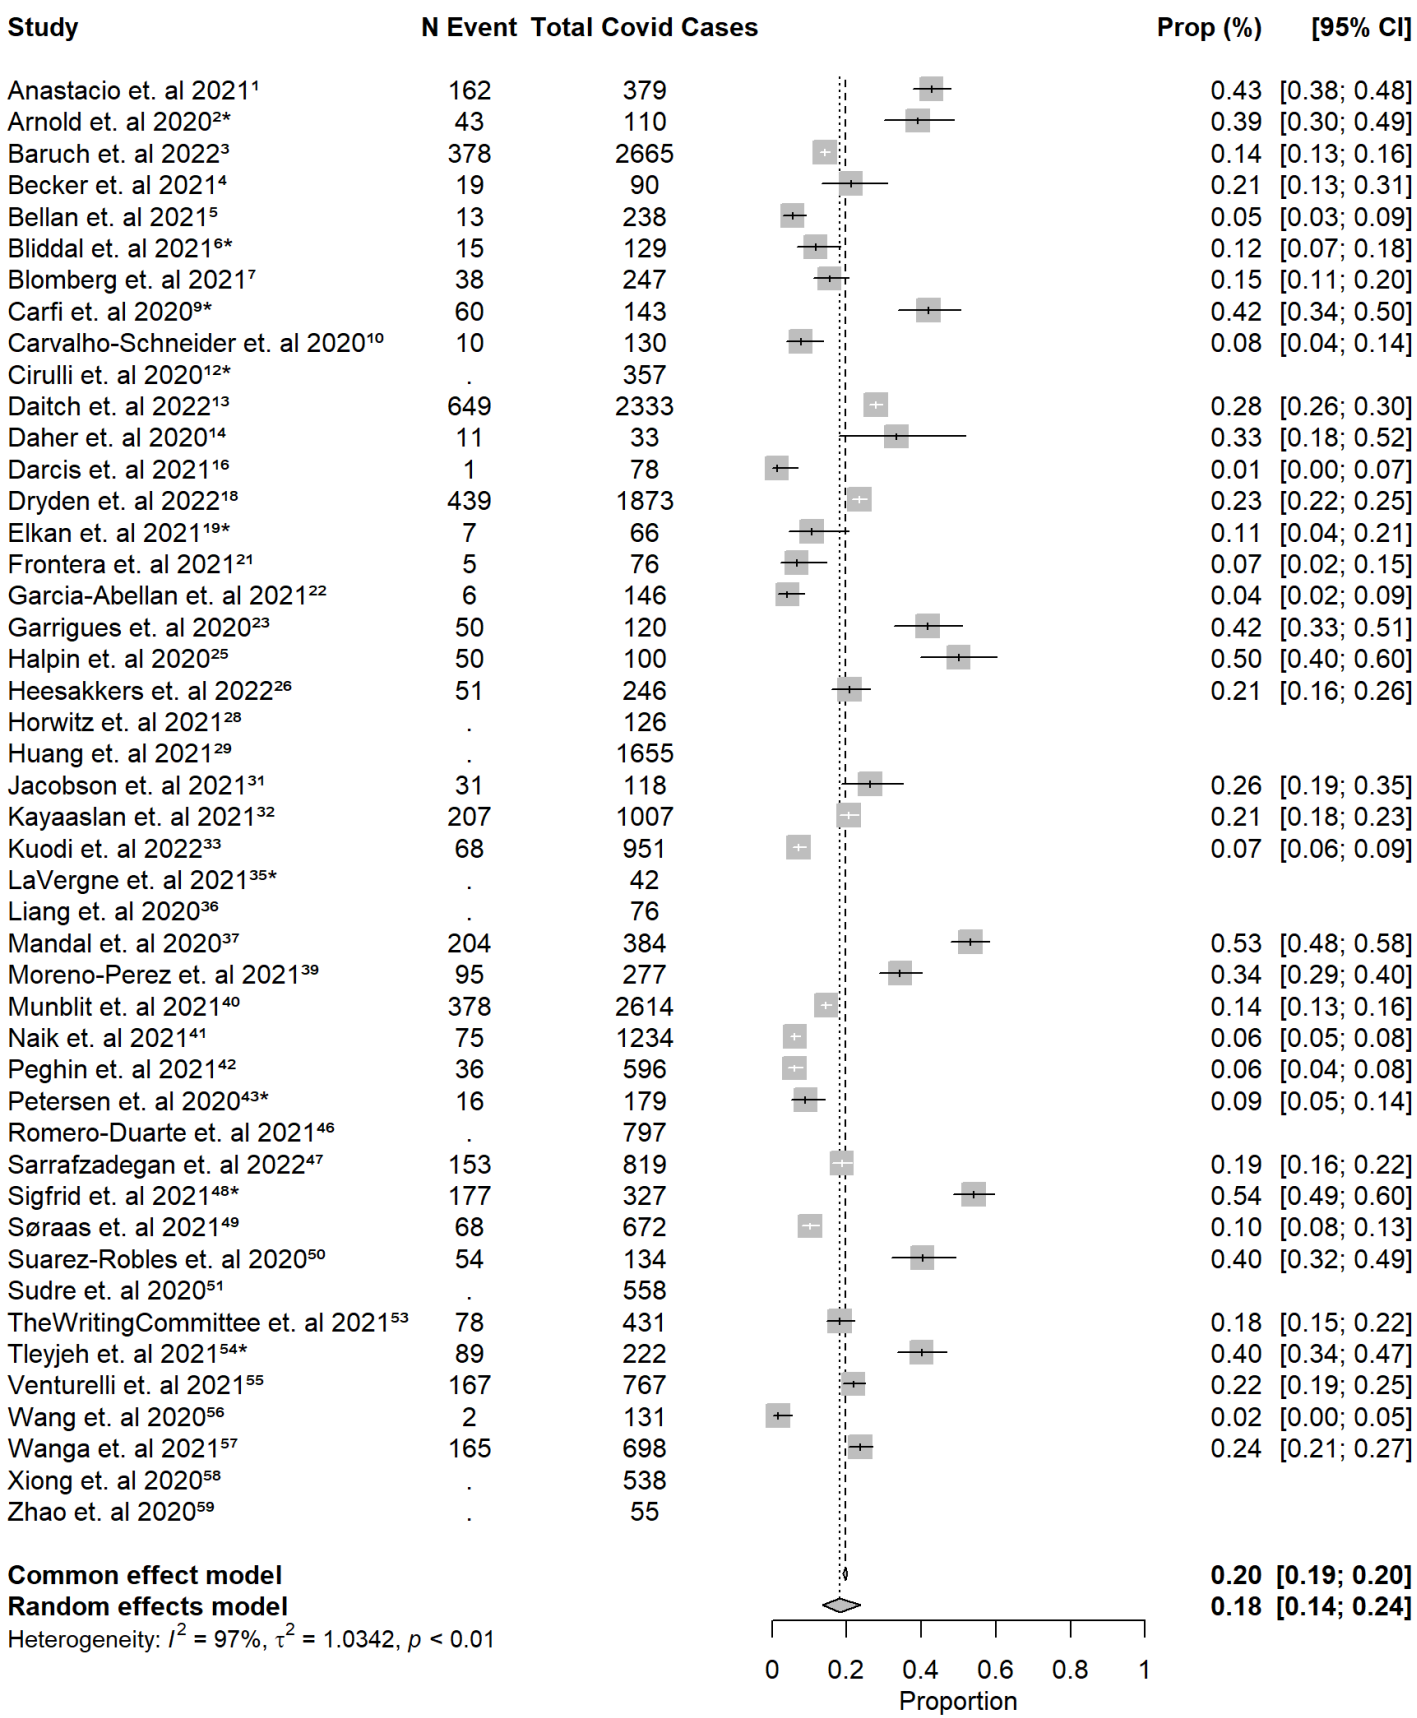

\* indicates value estimated from a figure

Analysis 1  
Shortness Of Breath: Long COVID

| Study                              | N Event | Total Covid Cases | Prop (%) | [95% CI]     |
|------------------------------------|---------|-------------------|----------|--------------|
| Buttery et. al 2021 <sup>8</sup>   | 1707    | 1865              | 0.92     | [0.90; 0.93] |
| Danesh et. al 2022 <sup>15</sup>   | 281     | 441               | 0.64     | [0.59; 0.68] |
| Davis et. al 2021 <sup>17*</sup>   | 2897    | 3762              | 0.77     | [0.76; 0.78] |
| Goertz et. al 2020 <sup>24</sup>   | 1500    | 2113              | 0.71     | [0.69; 0.73] |
| Larson et. al 2022 <sup>34</sup>   | .       | 2314              |          |              |
| Reese et. al 2022 <sup>44</sup>    | 690     | 2464              | 0.28     | [0.26; 0.30] |
| Tabacof et. al 2022 <sup>52*</sup> | 83      | 156               | 0.53     | [0.45; 0.61] |

Common effect model

Random effects model

Heterogeneity:  $I^2 = 100\%$ ,  $\tau^2 = 1.0267$ ,  $p = 0$

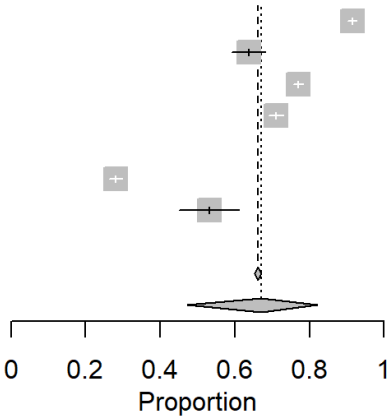

\* indicates value estimated from a figure

Analysis 1  
Shortness Of Breath: EHR

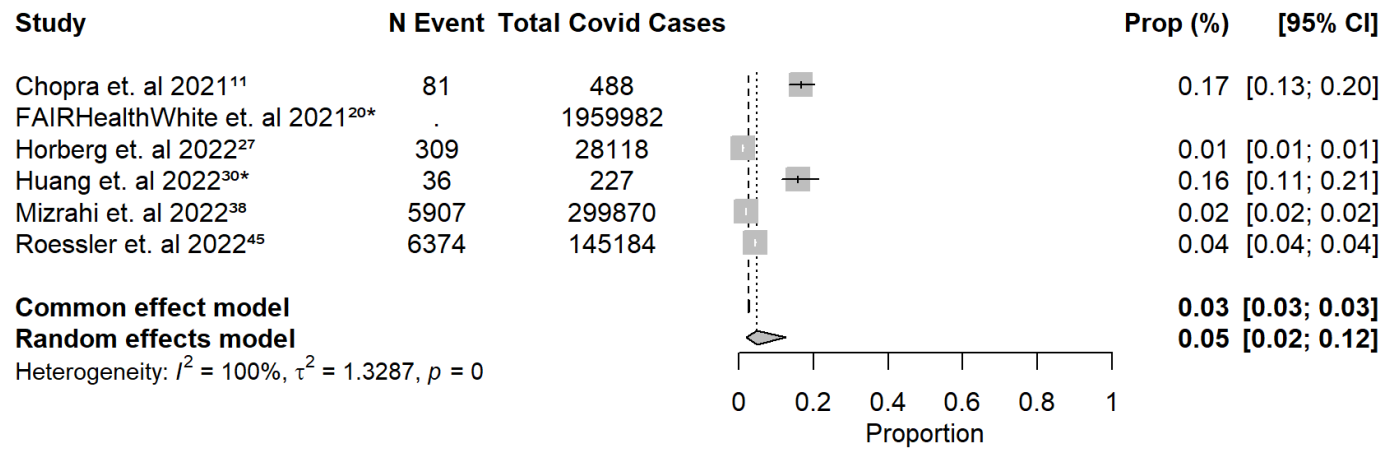

\* indicates value estimated from a figure

Sleep Problems:

Analysis 1  
Sleep Problems: Survey

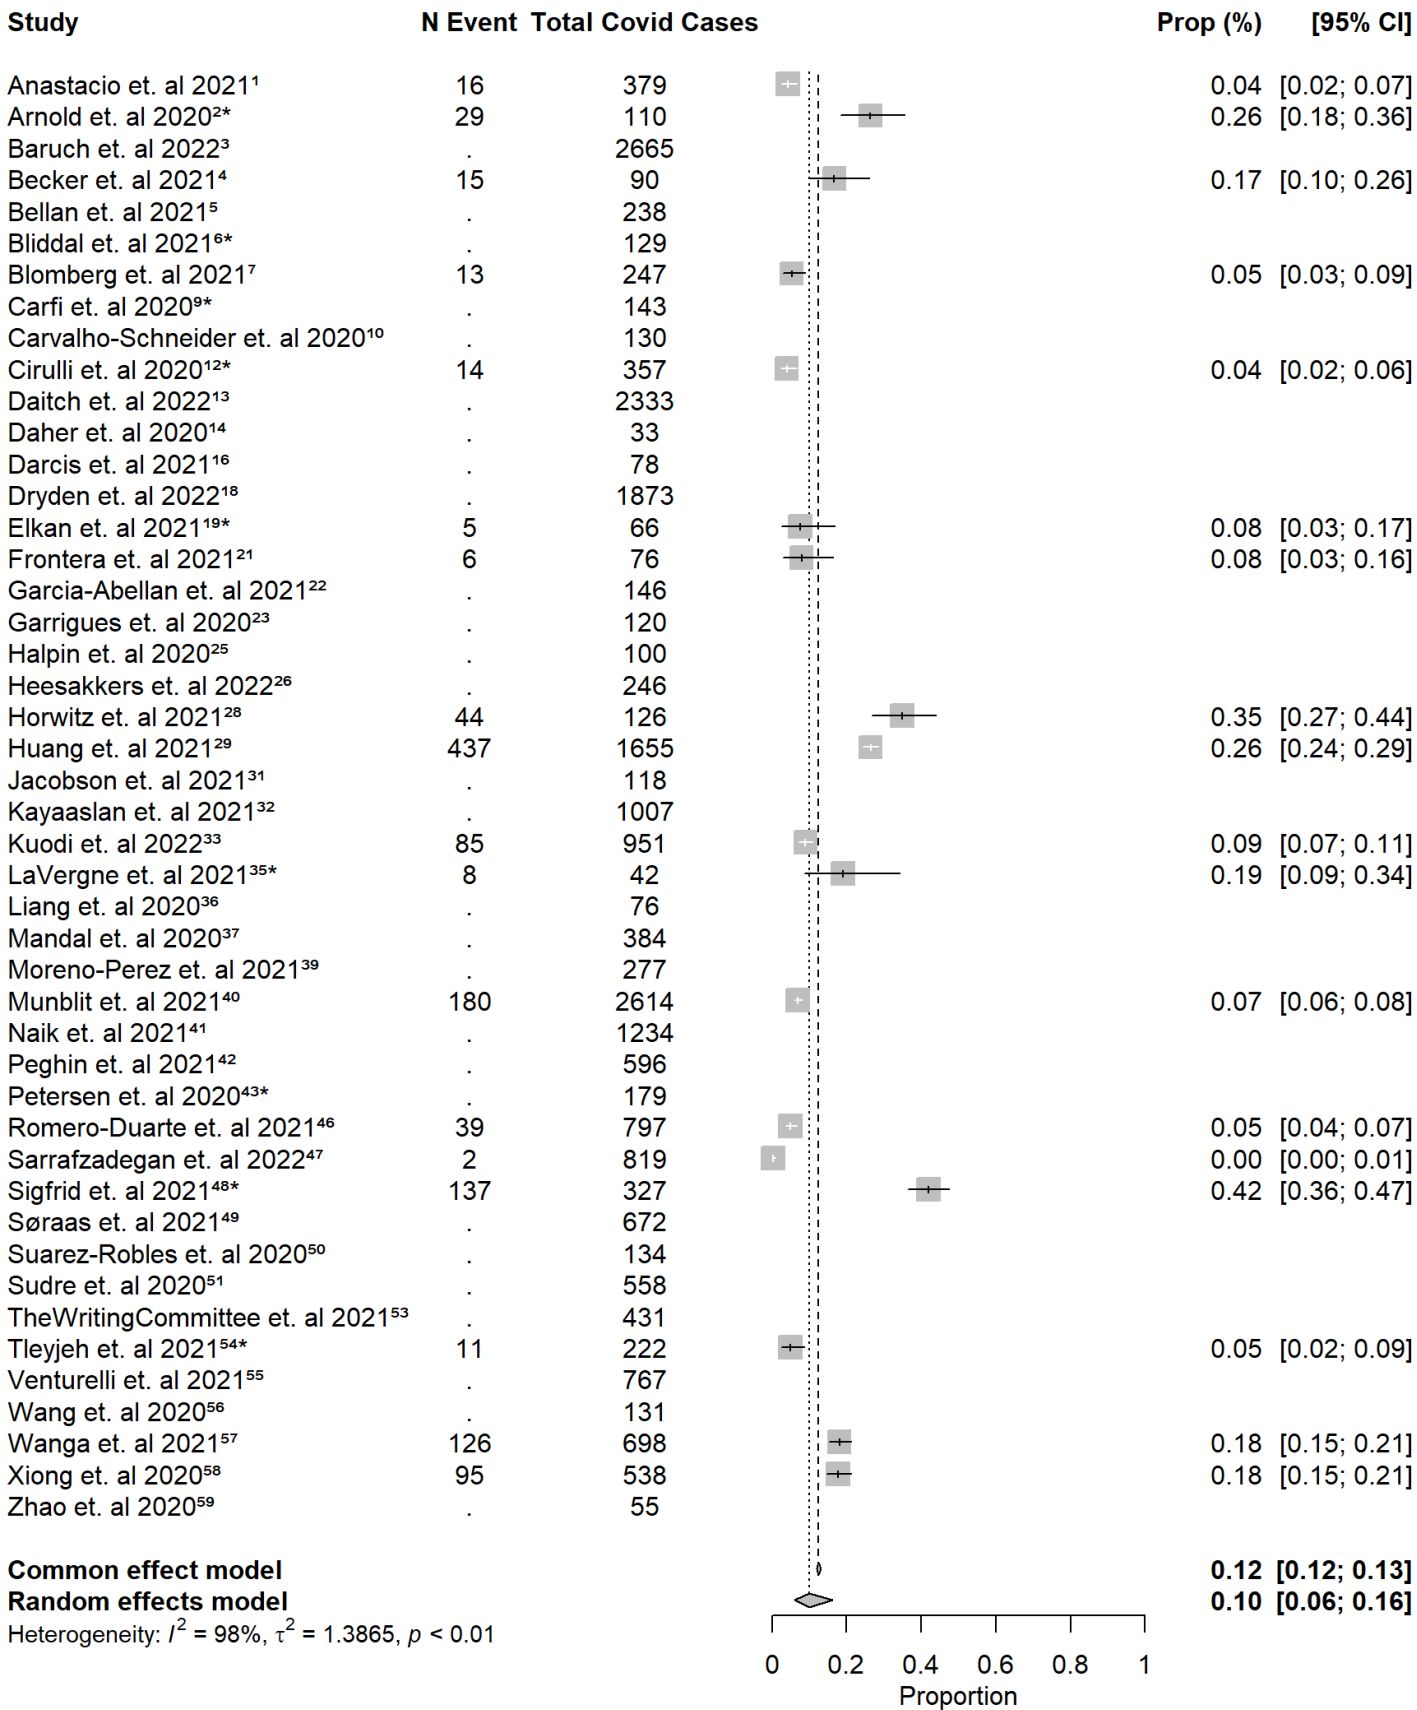

\* indicates value estimated from a figure



Analysis 1  
Sleep Problems: Long COVID

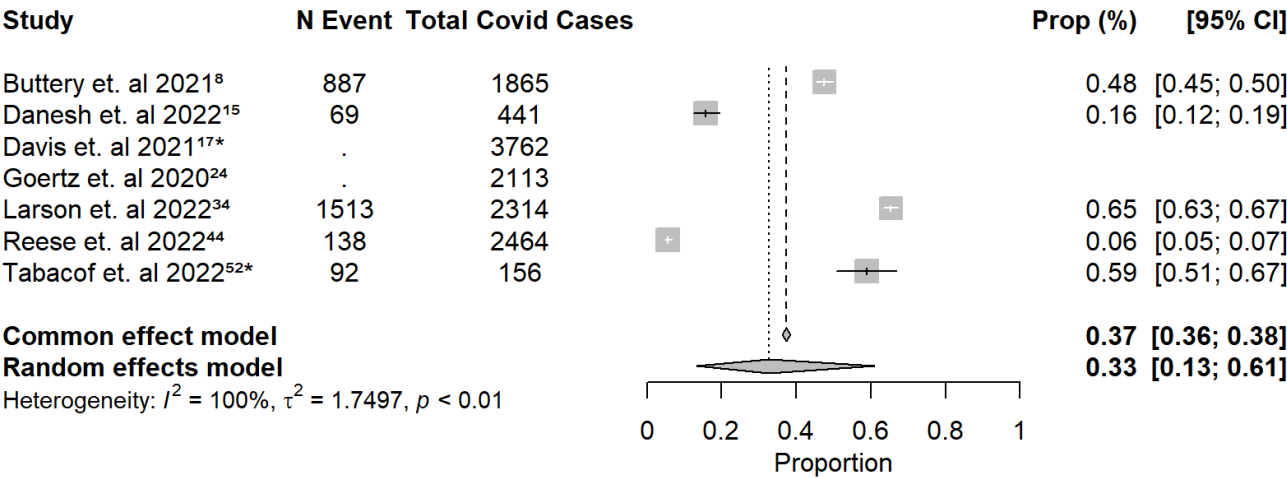

\* indicates value estimated from a figure

Analysis 1  
Sleep Problems: EHR

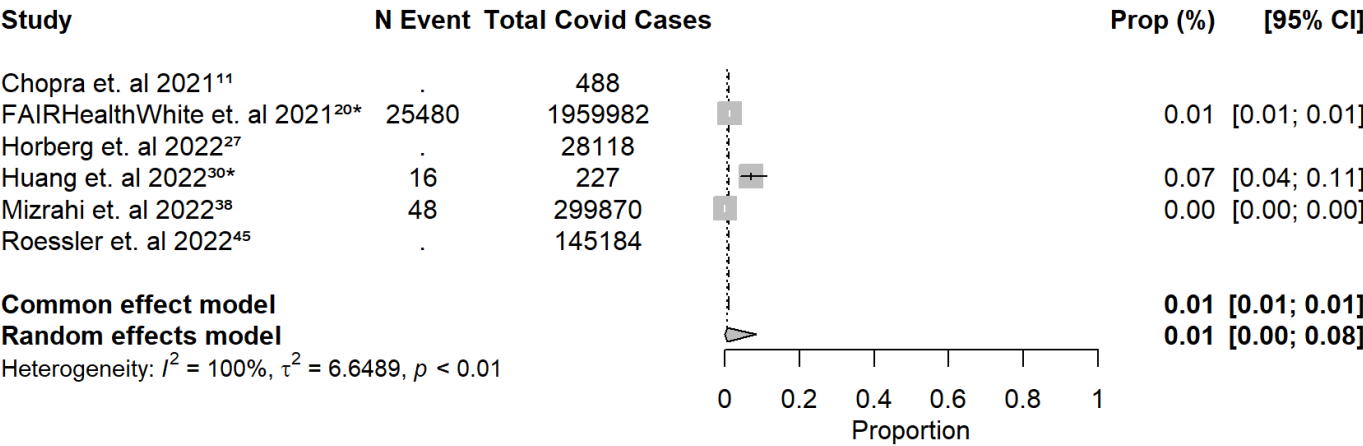

\* indicates value estimated from a figure

# Problems Thinking Or Concentrating:

Analysis 1  
Problems Thinking Or Concentrating: Survey

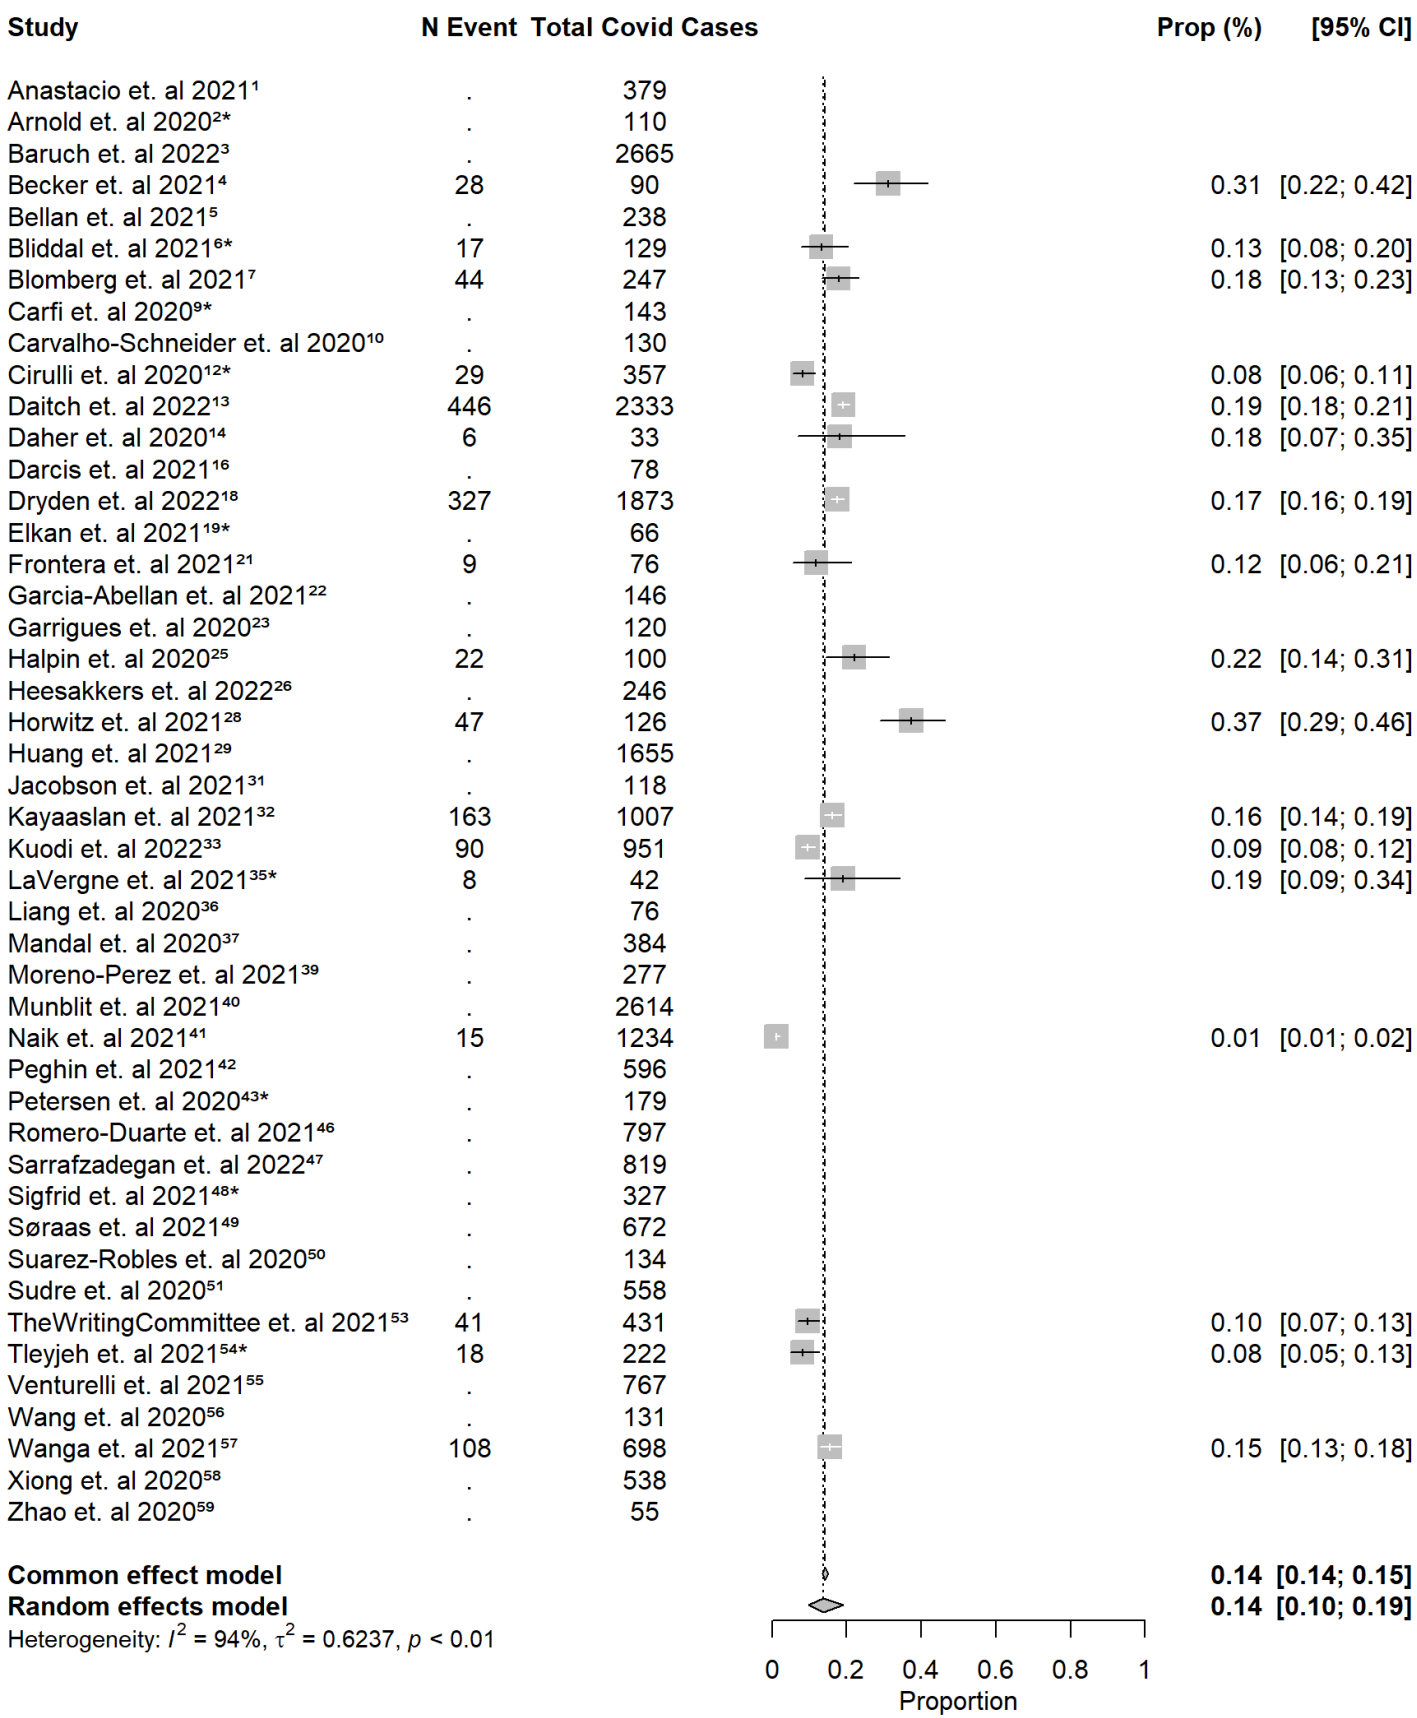

\* indicates value estimated from a figure

Analysis 1

Problems Thinking Or Concentrating: Long COVID

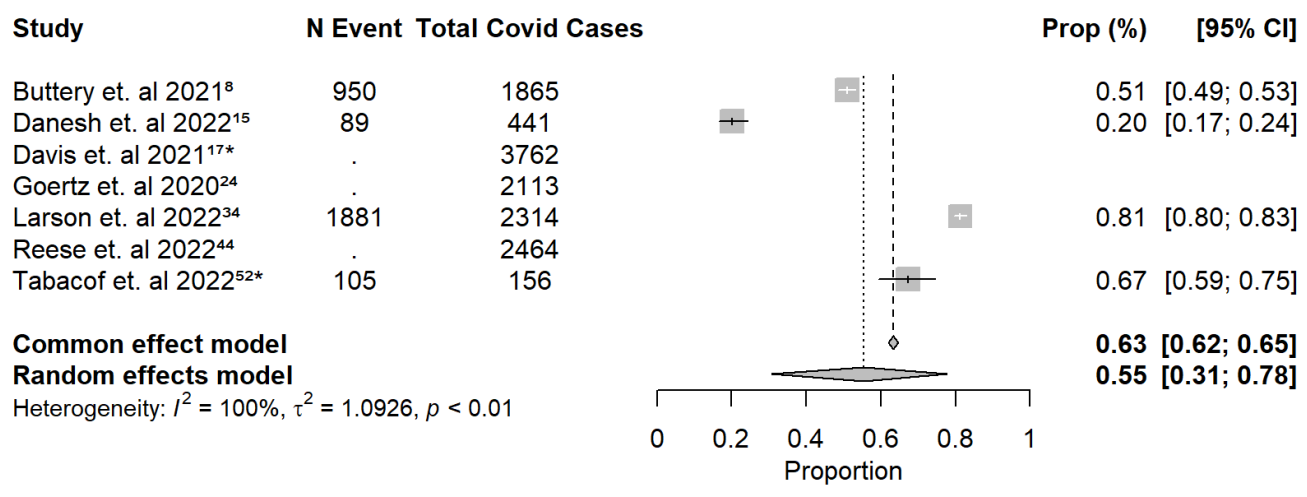

\* indicates value estimated from a figure

Analysis 1  
Problems Thinking Or Concentrating: EHR

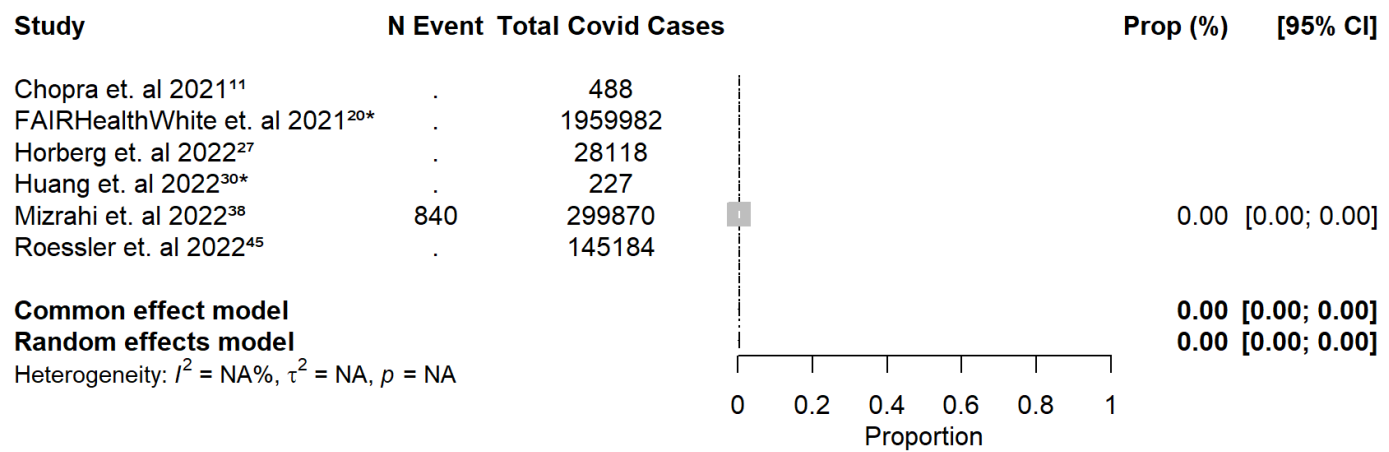

\* indicates value estimated from a figure

Dizziness:

Analysis 1  
Dizziness: Survey

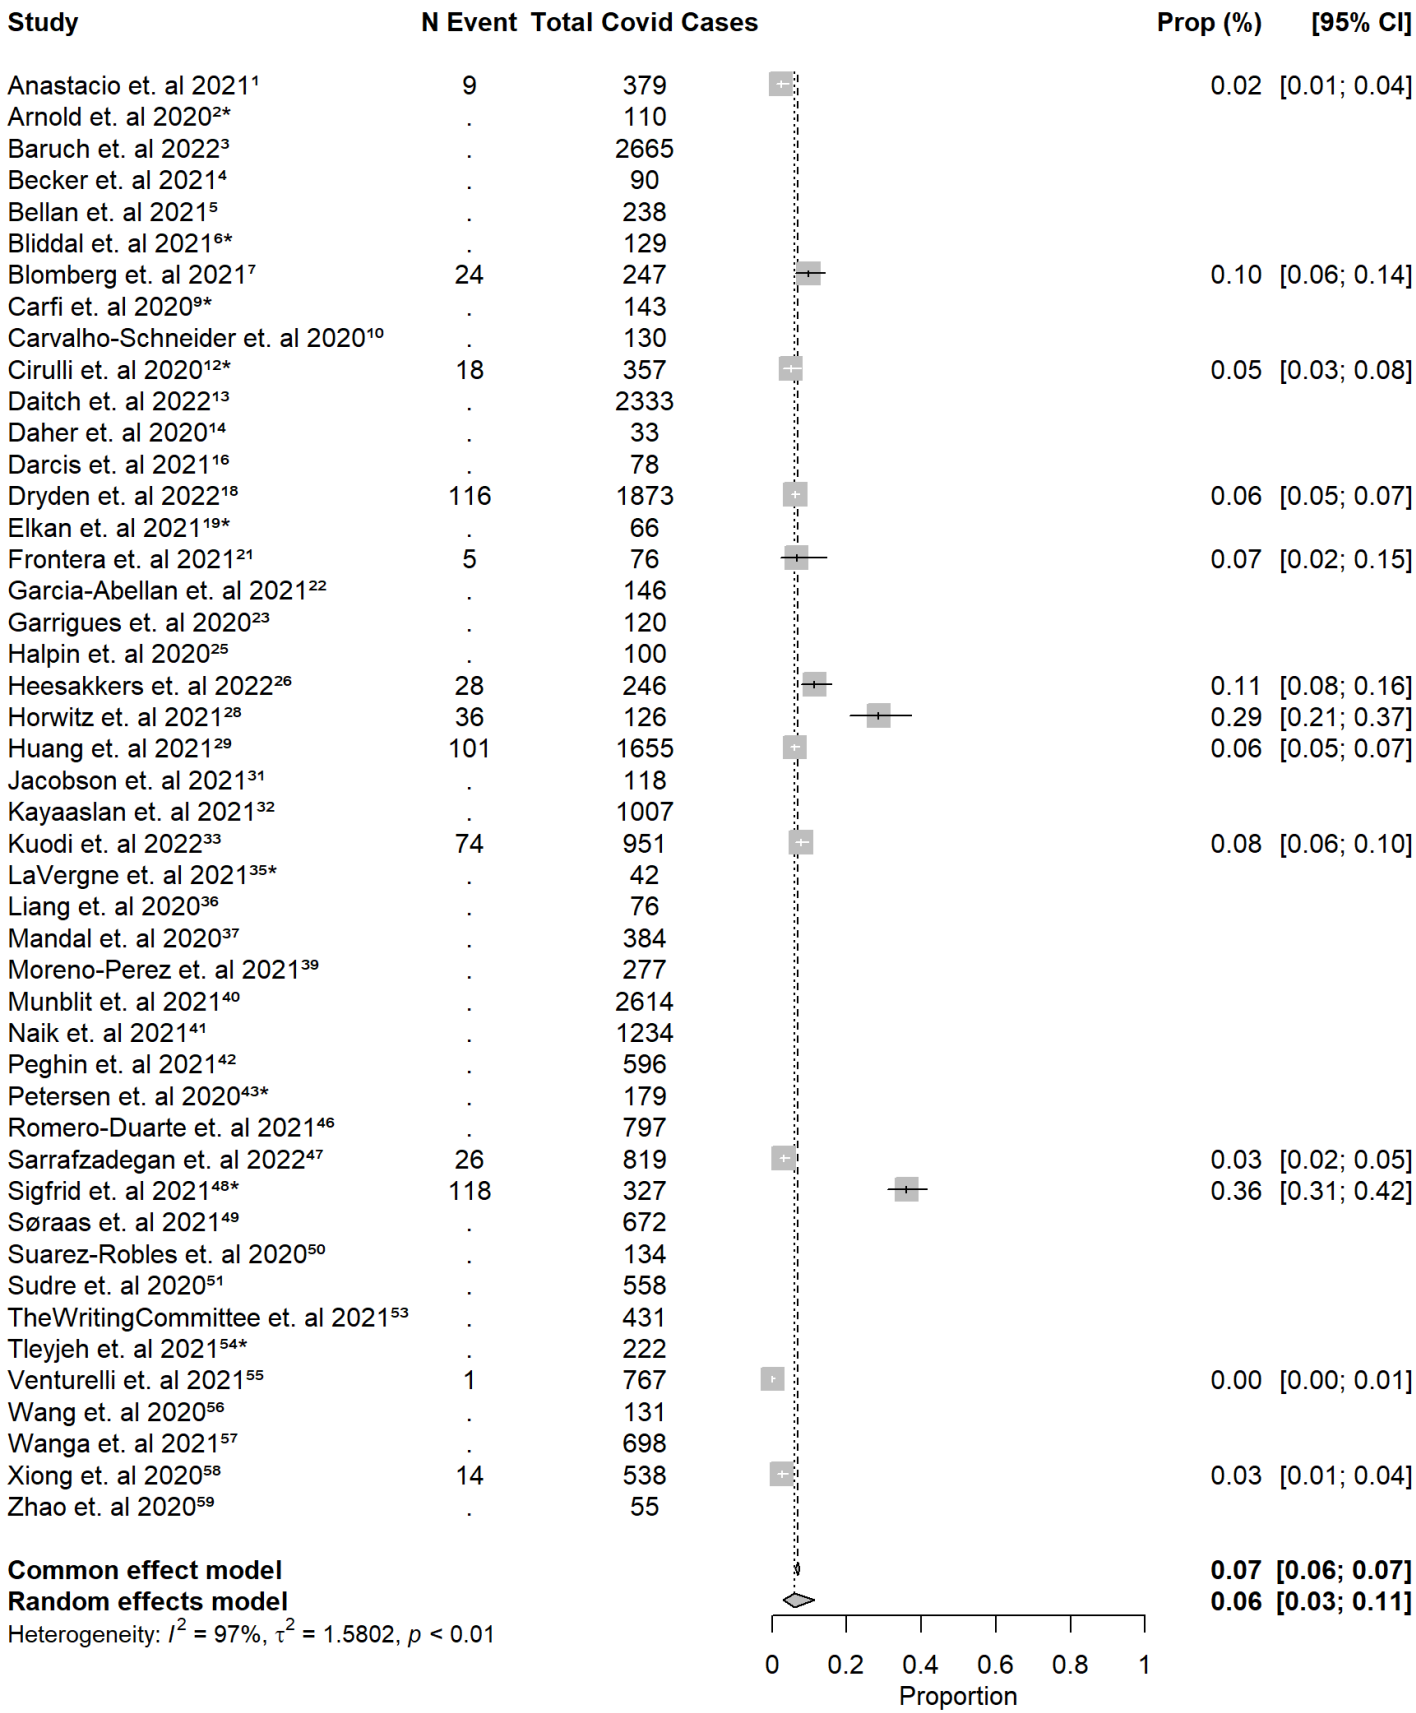

\* indicates value estimated from a figure

Analysis 1  
Dizziness: Long COVID

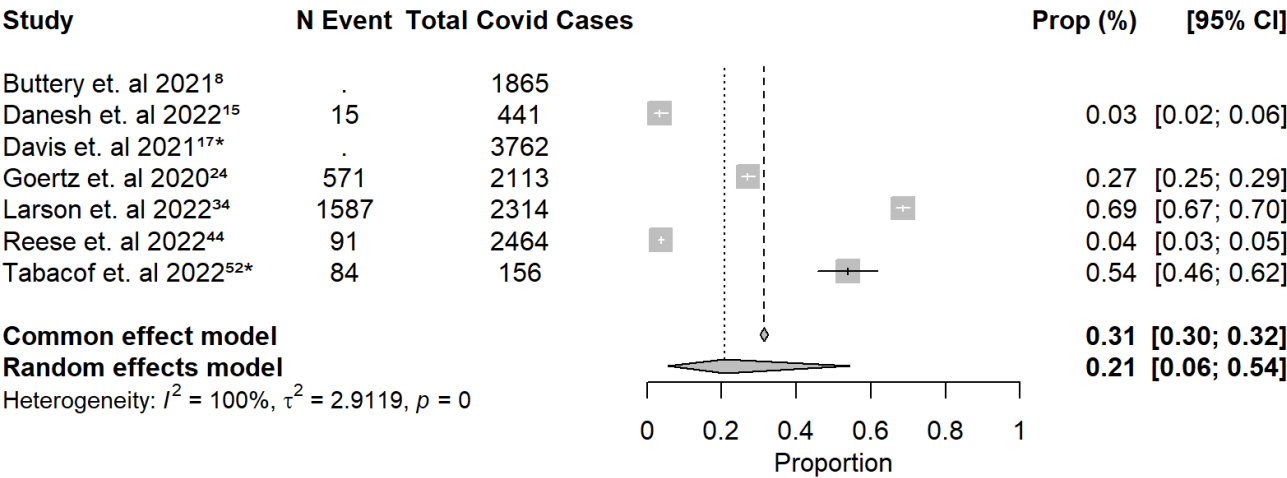

\* indicates value estimated from a figure

Analysis 1  
Dizziness: EHR

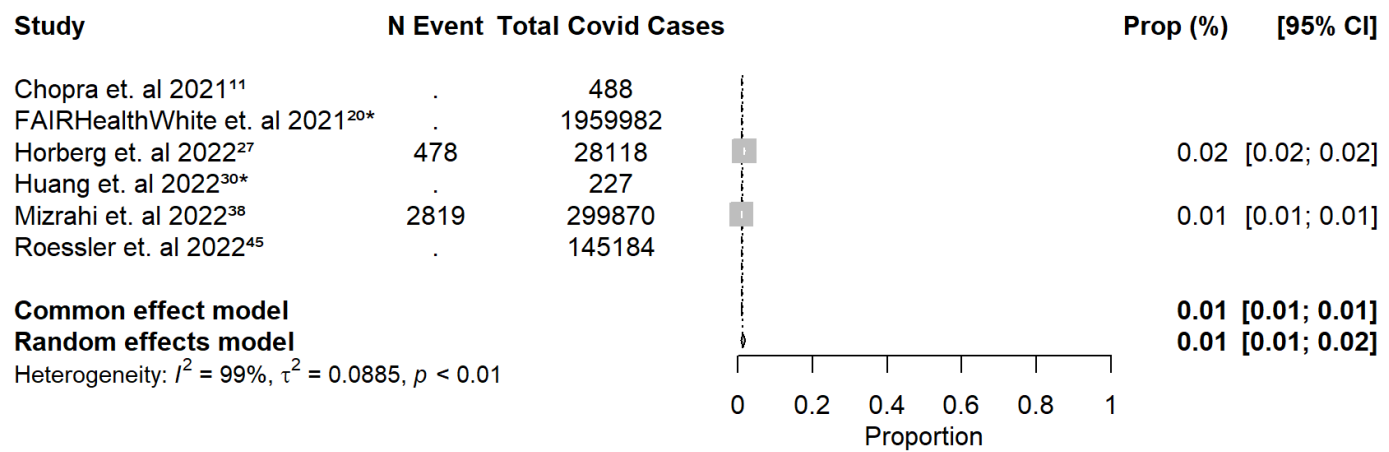

\* indicates value estimated from a figure



Headache:

Analysis 1  
Headache: Survey

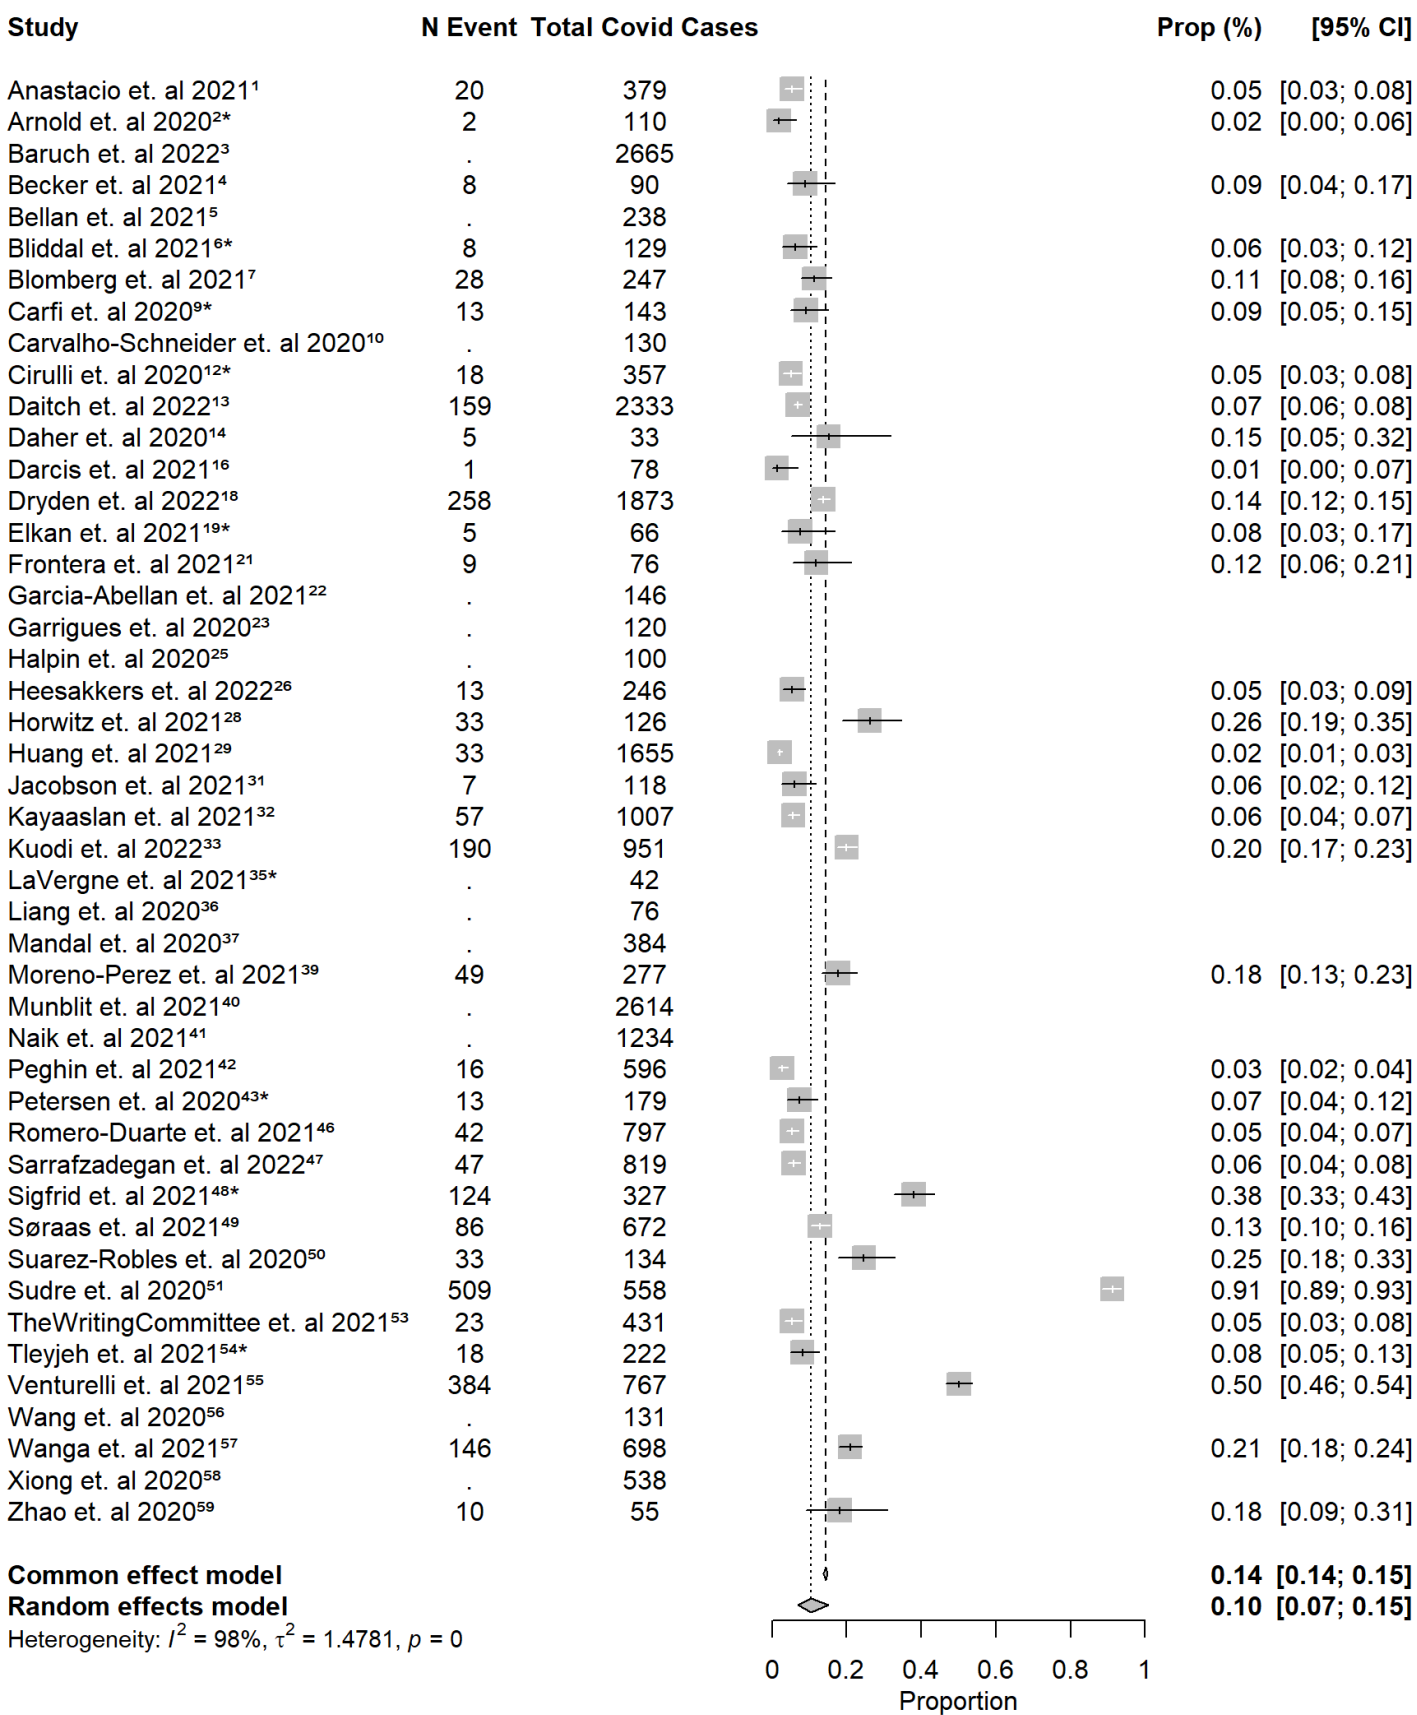

\* indicates value estimated from a figure

Analysis 1  
Headache: Long COVID

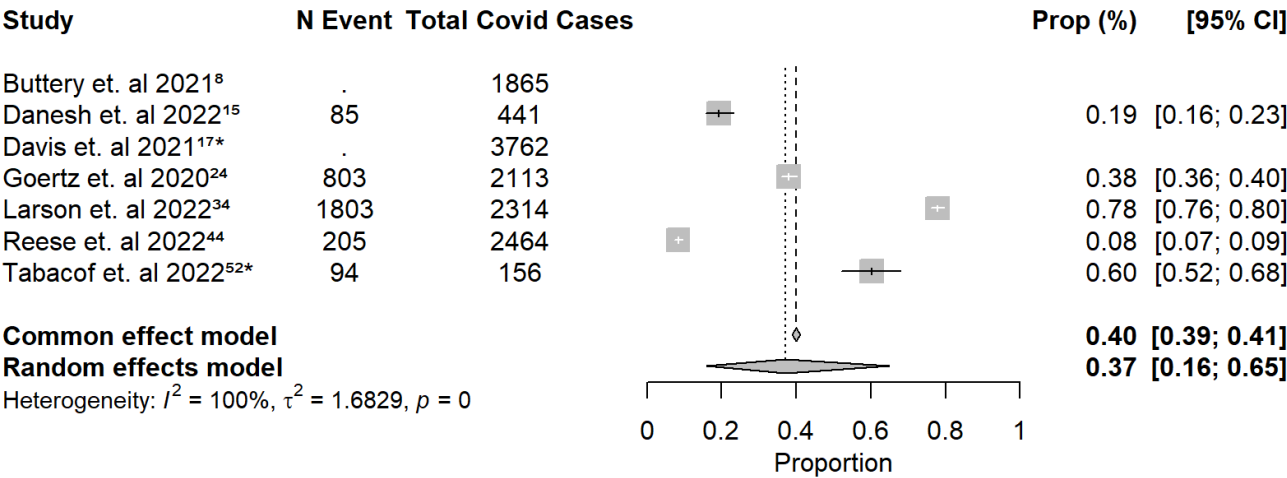

\* indicates value estimated from a figure

Analysis 1  
Headache: EHR

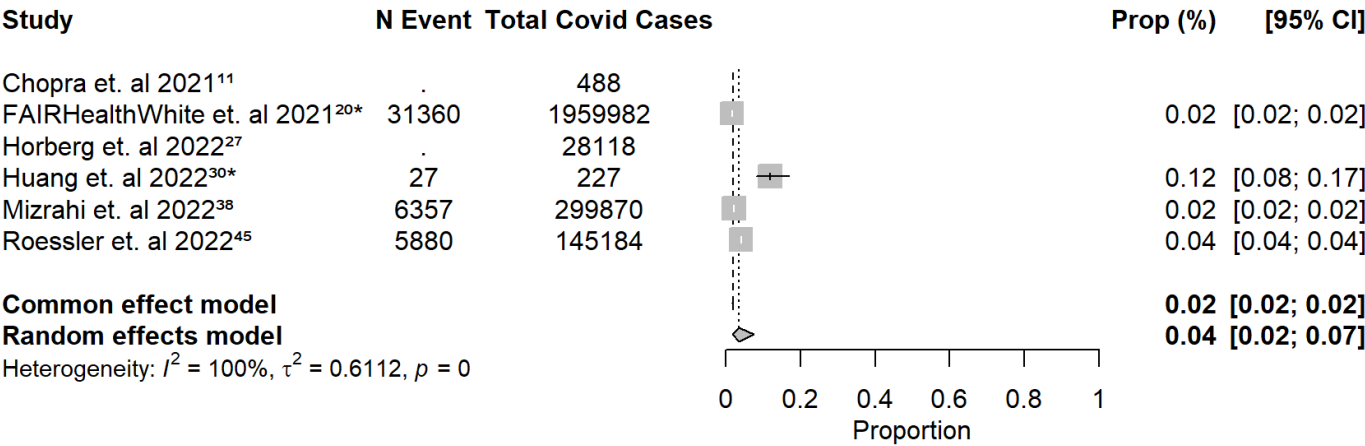

\* indicates value estimated from a figure

# Nerve Problems Seizures:

## Analysis 1 Nerve Problems Seizures: Survey

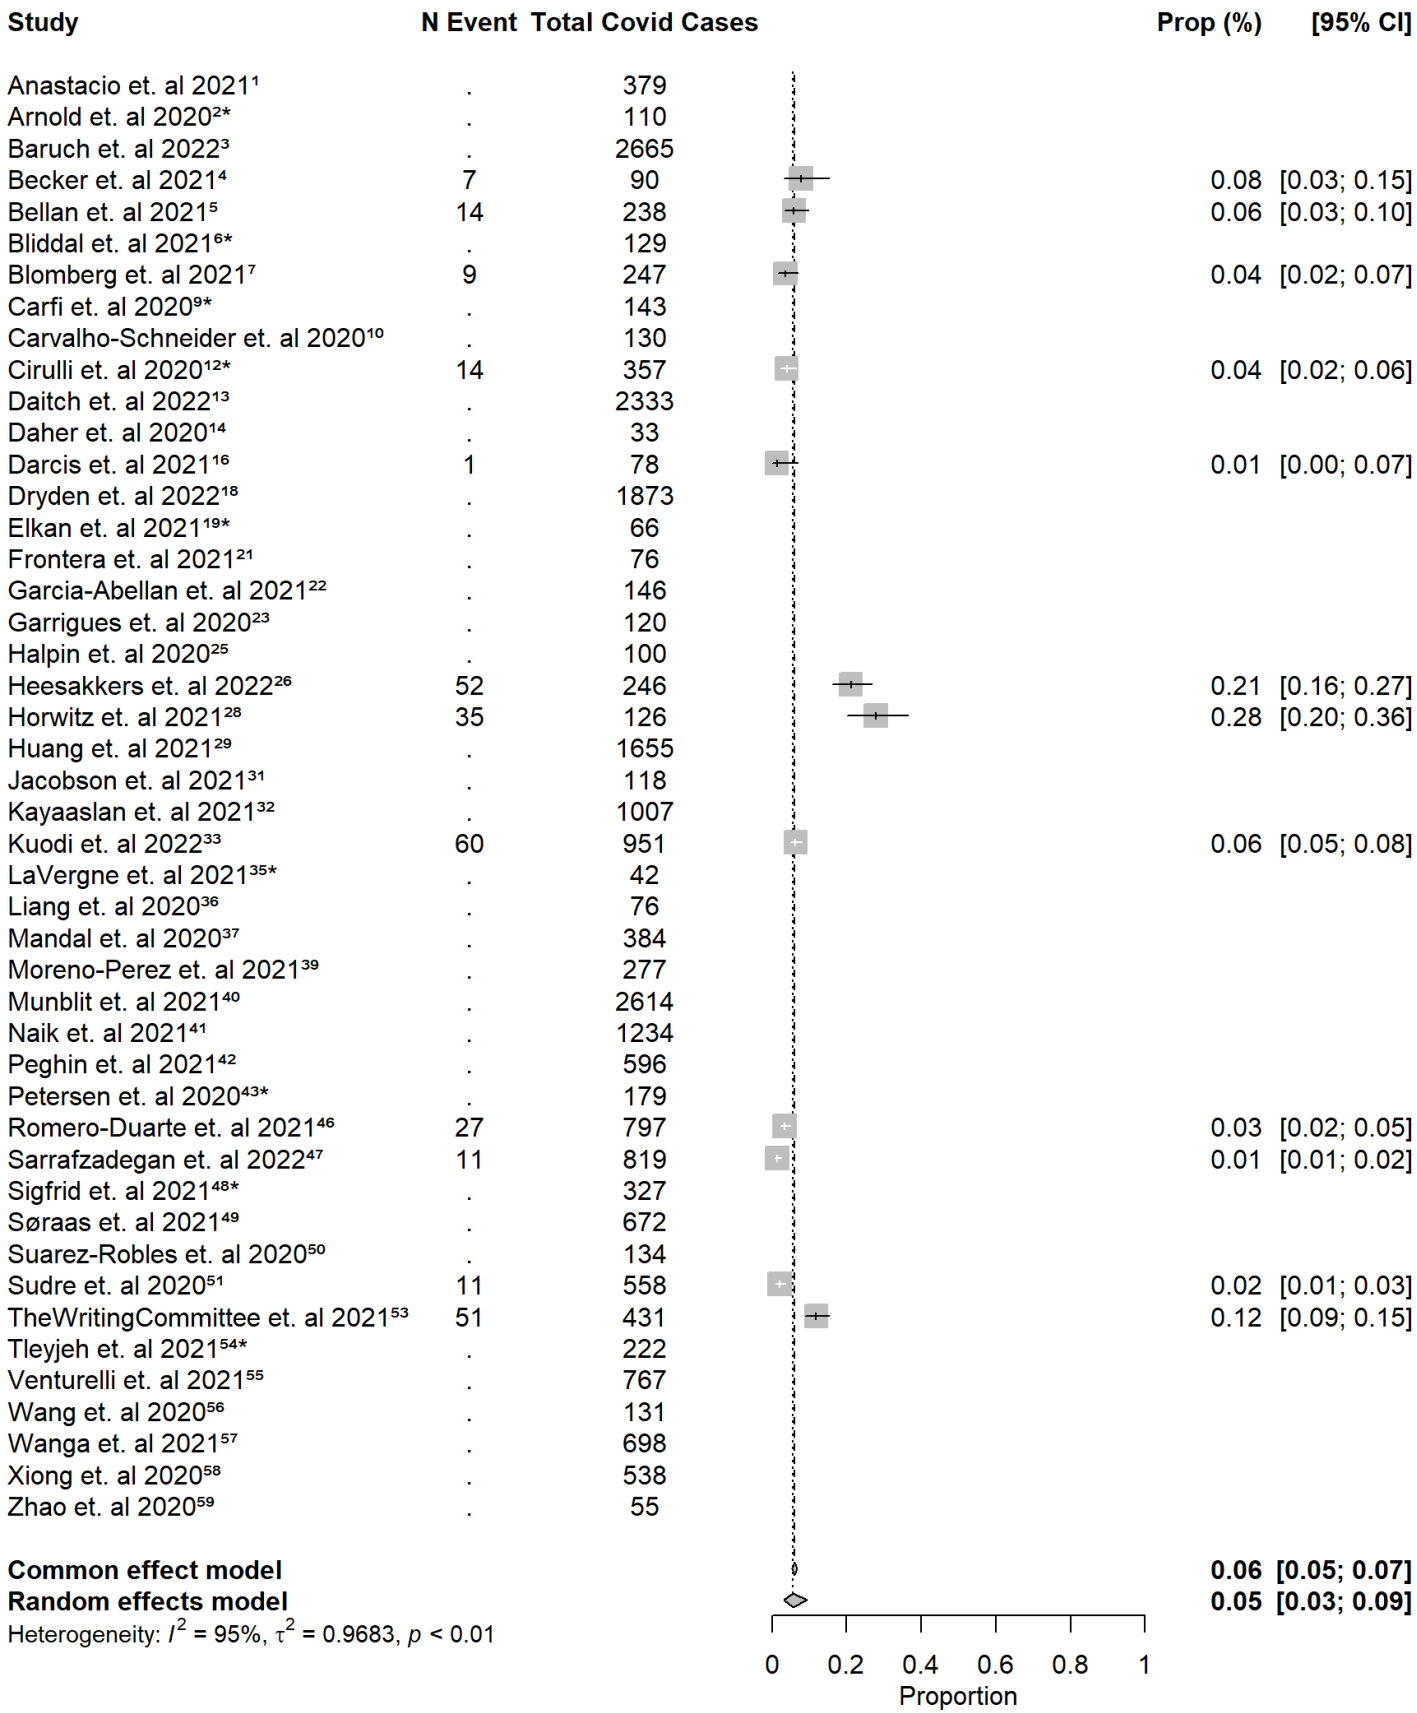

\* indicates value estimated from a figure

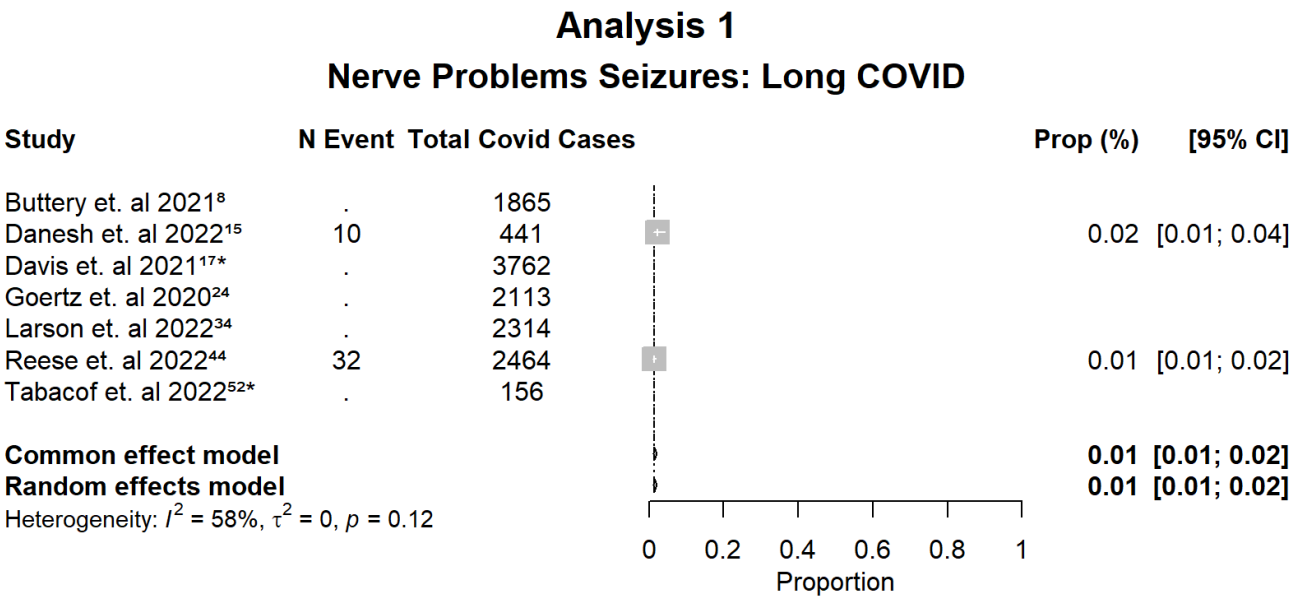

Analysis 1  
Nerve Problems Seizures: EHR

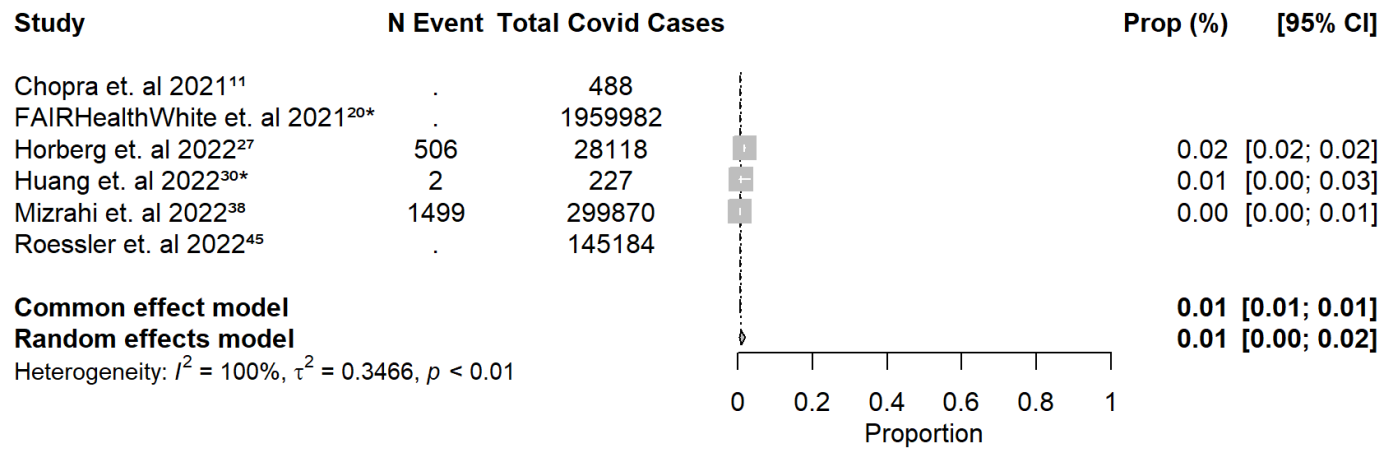

\* indicates value estimated from a figure

# Loss Of Or Change In Smell Or Taste:

## Analysis 1 Loss Of Or Change In Smell Or Taste: Survey

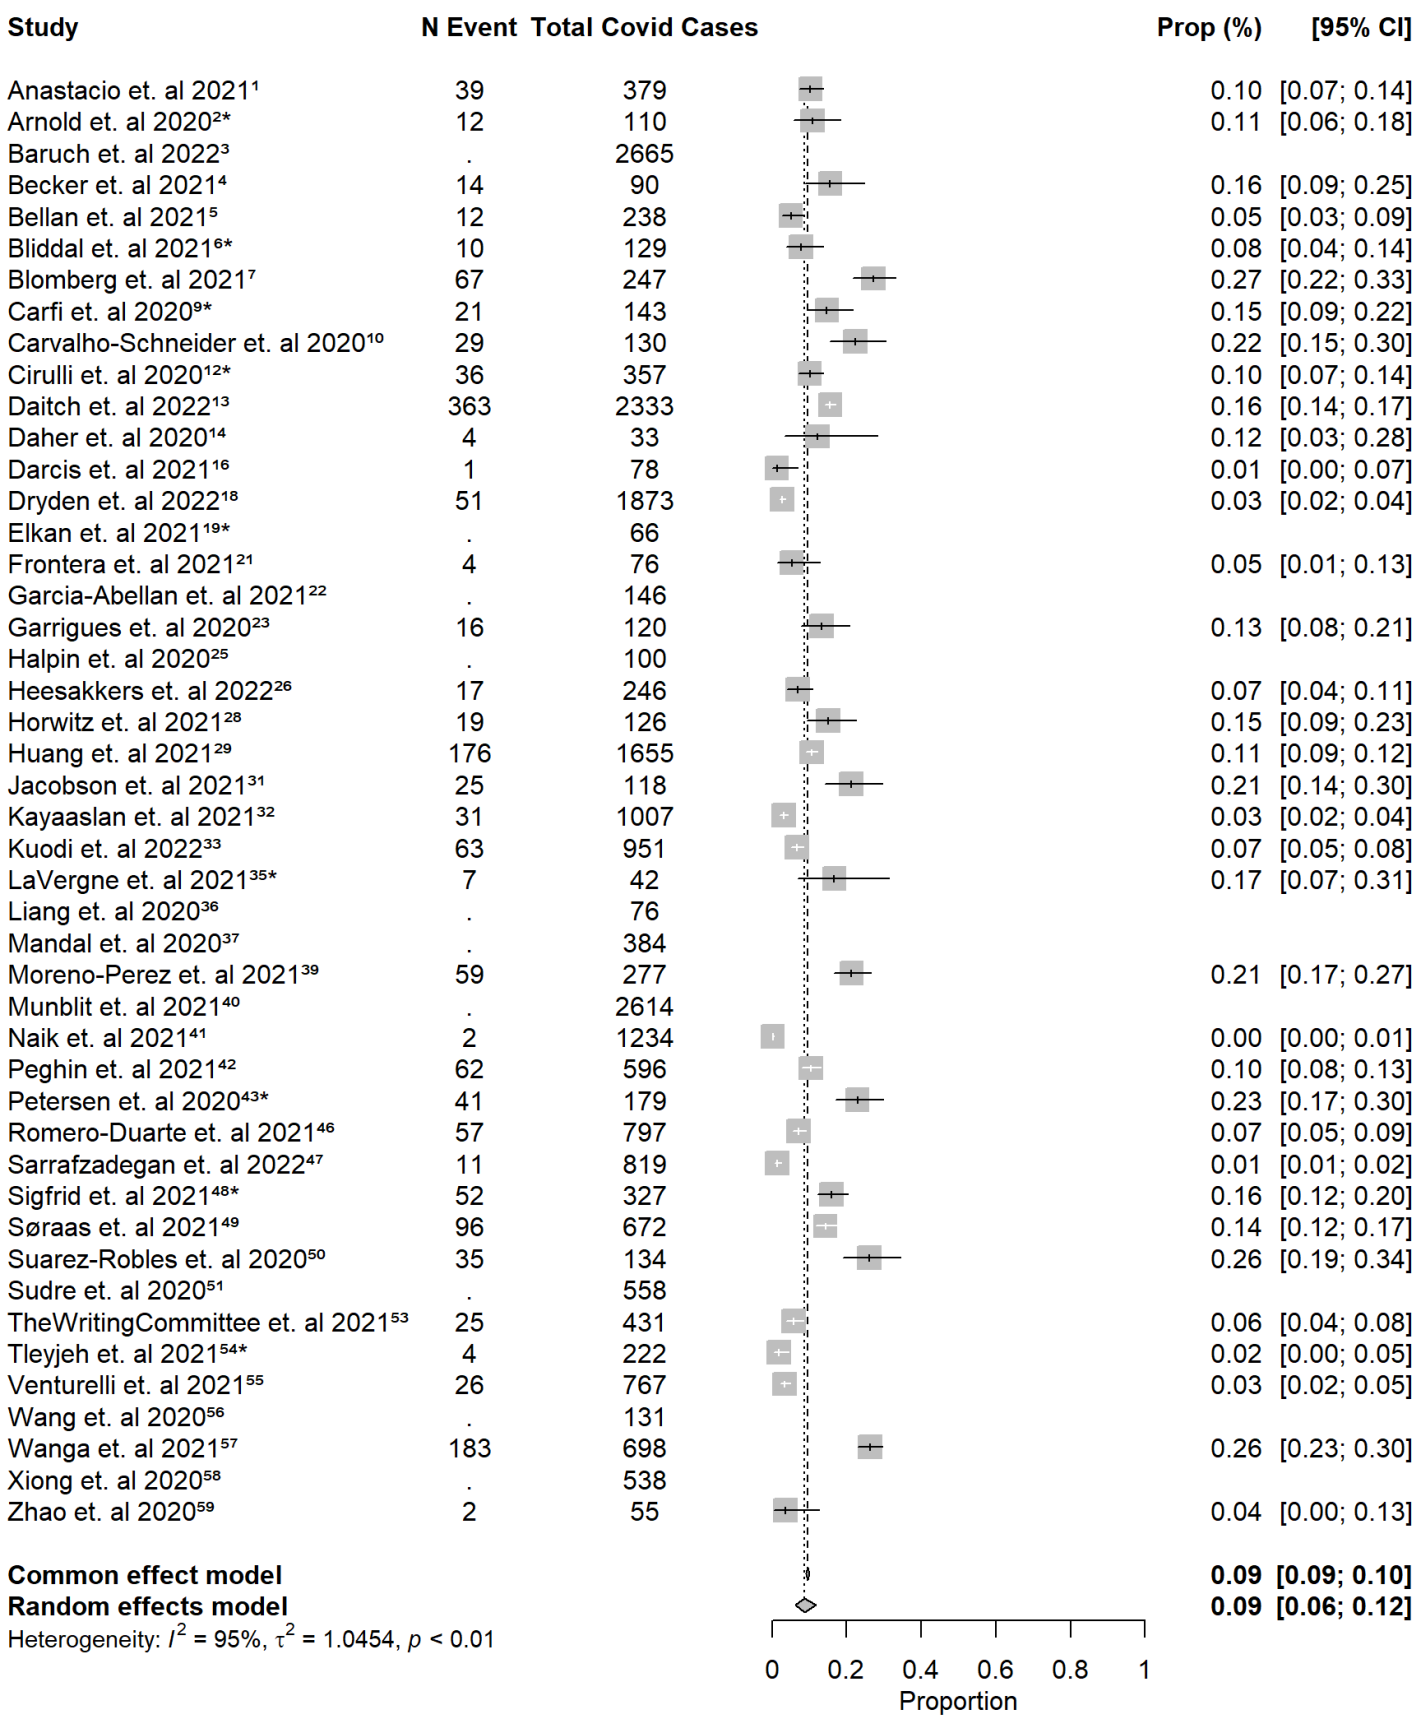

\* indicates value estimated from a figure

Analysis 1

Loss Of Or Change In Smell Or Taste: Long COVID

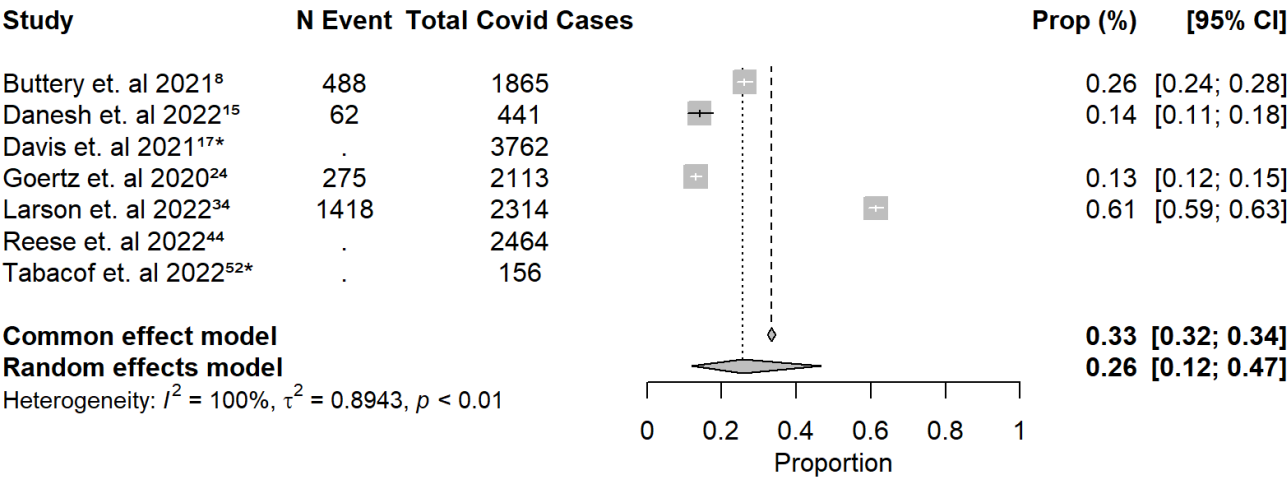

\* indicates value estimated from a figure



Analysis 1  
Loss Of Or Change In Smell Or Taste: EHR

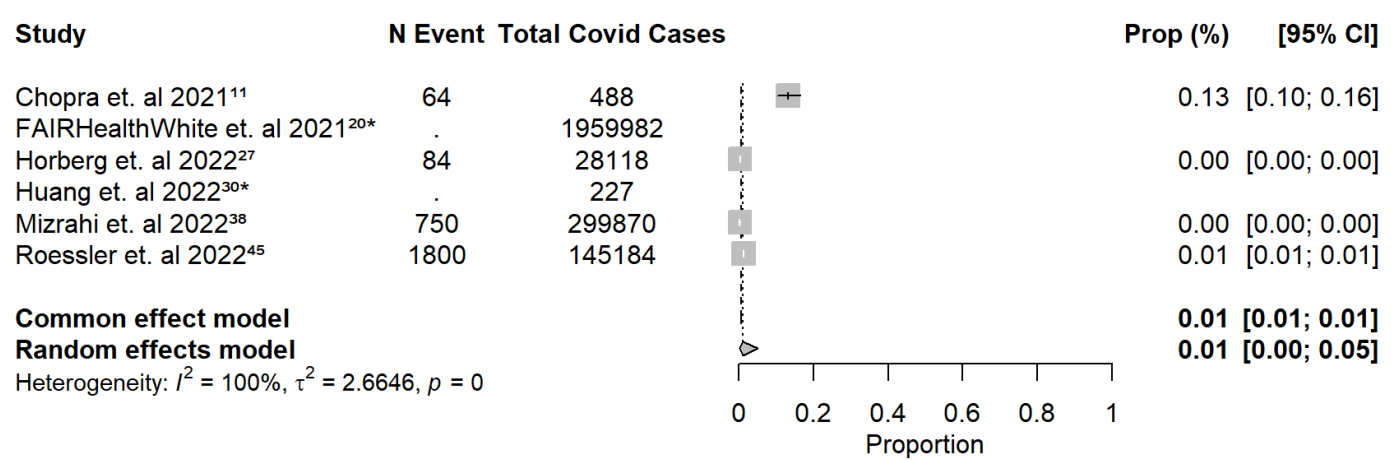

\* indicates value estimated from a figure

# Mental Health Concerns:

## Analysis 1 Mental Health Concerns: Survey

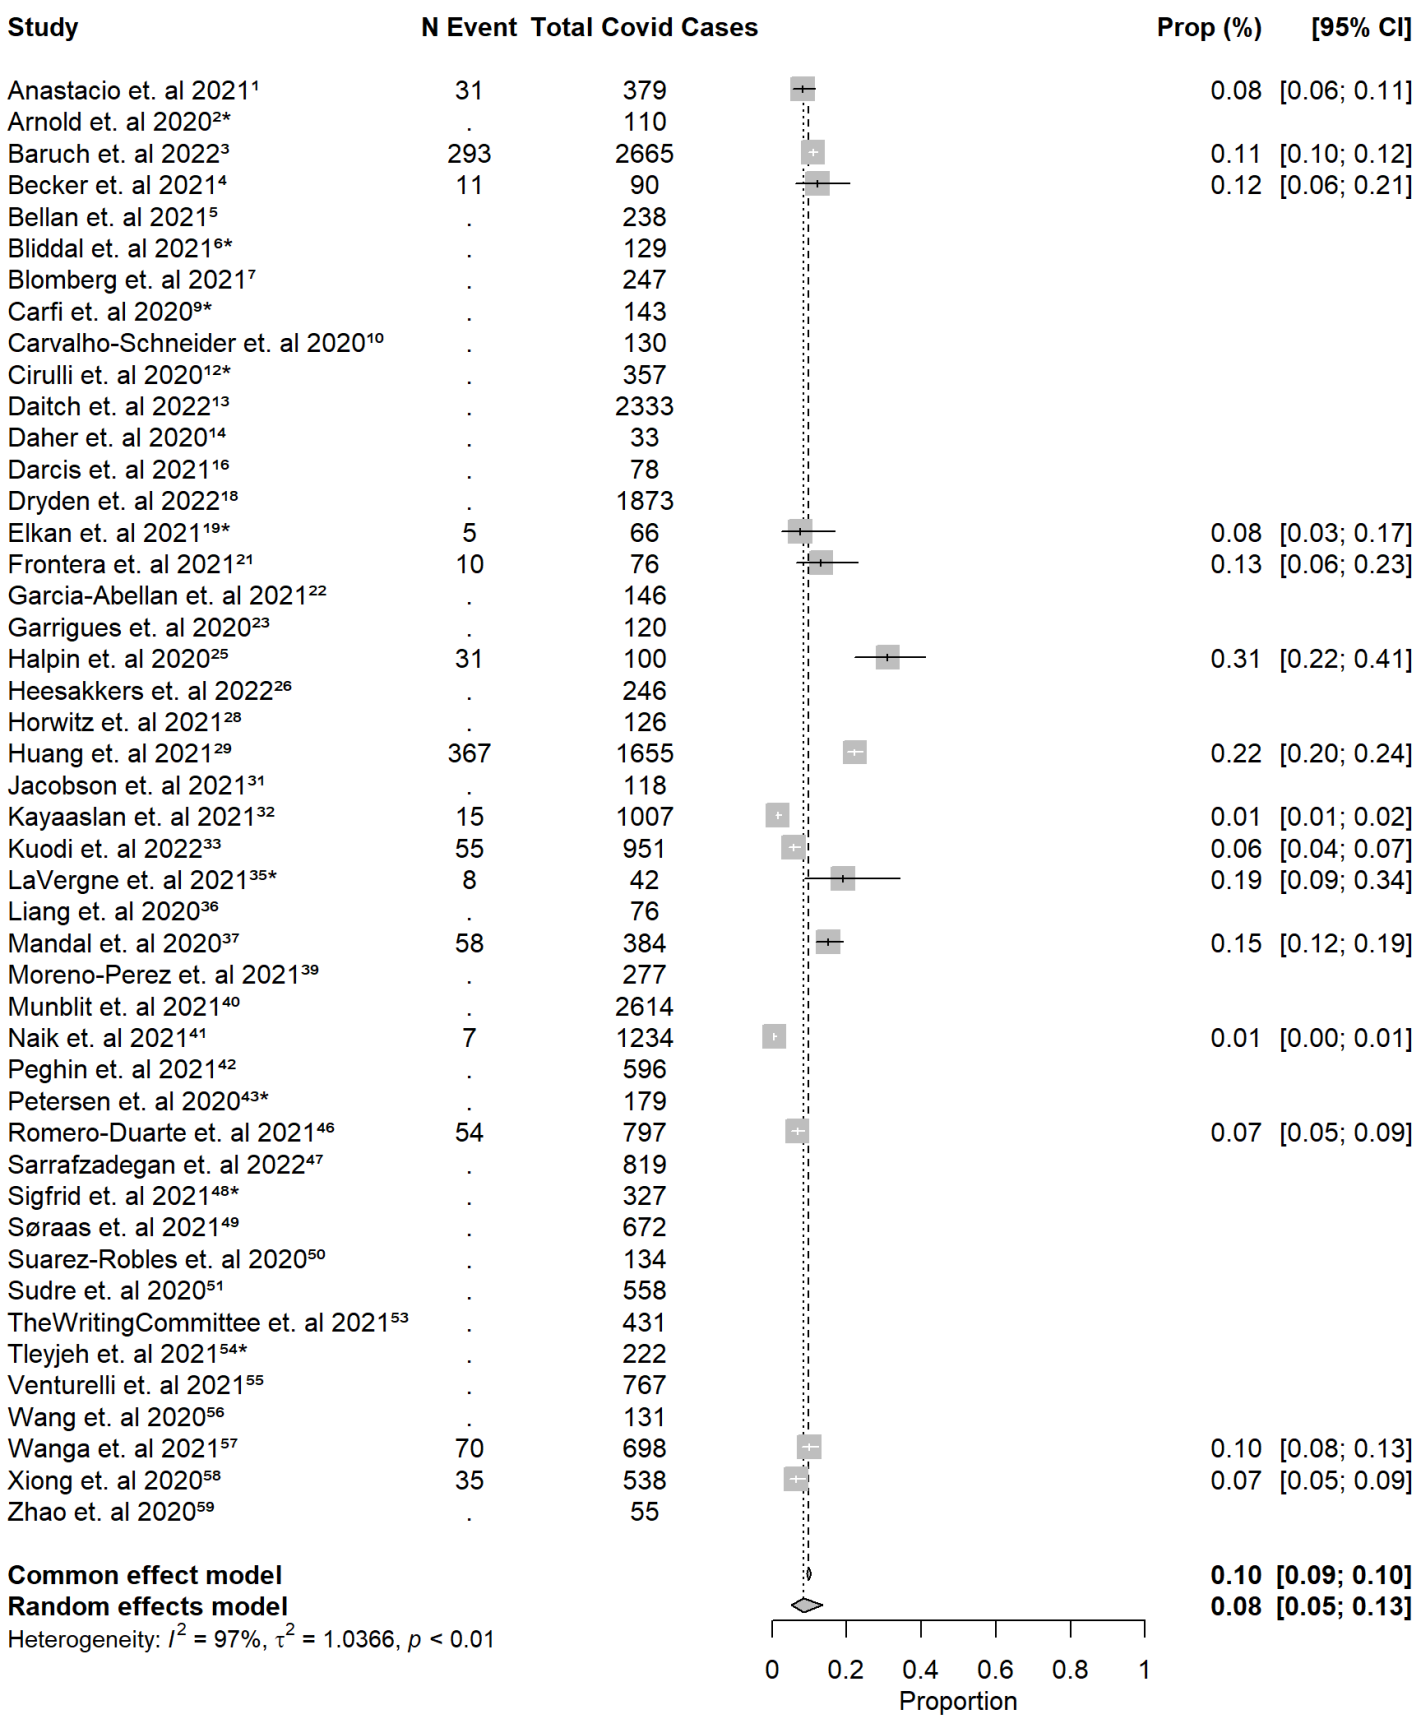

\* indicates value estimated from a figure

Analysis 1  
Mental Health Concerns: Long COVID

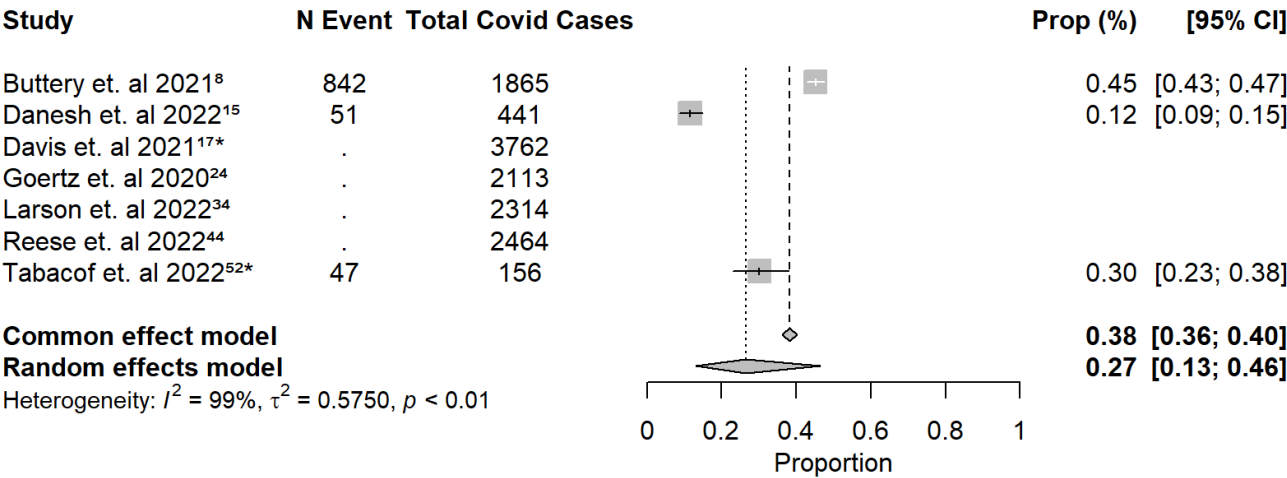

\* indicates value estimated from a figure

Analysis 1  
Mental Health Concerns: EHR

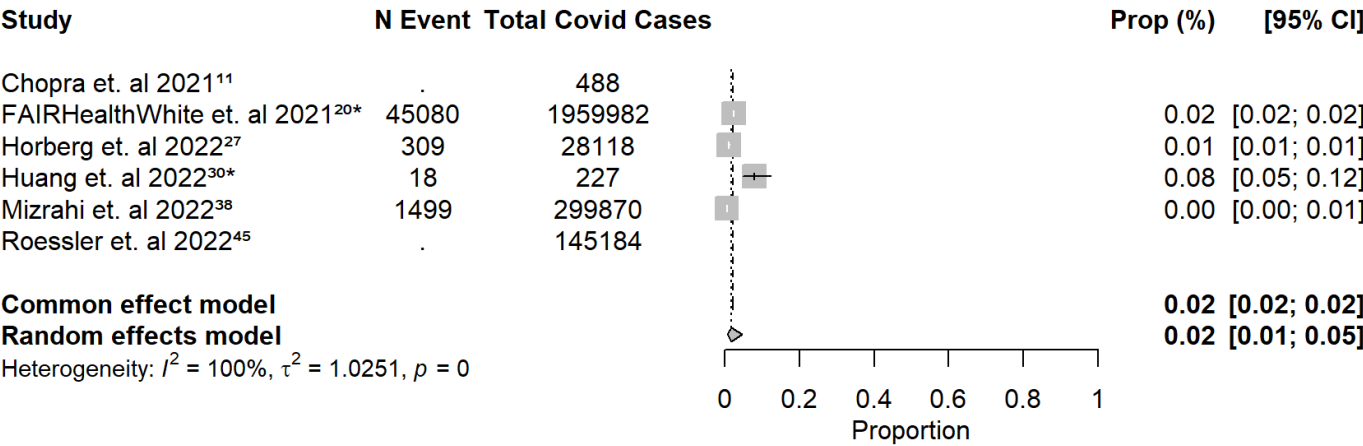

\* indicates value estimated from a figure

Joint Muscle Pain:

Analysis 1  
Joint Muscle Pain: Survey

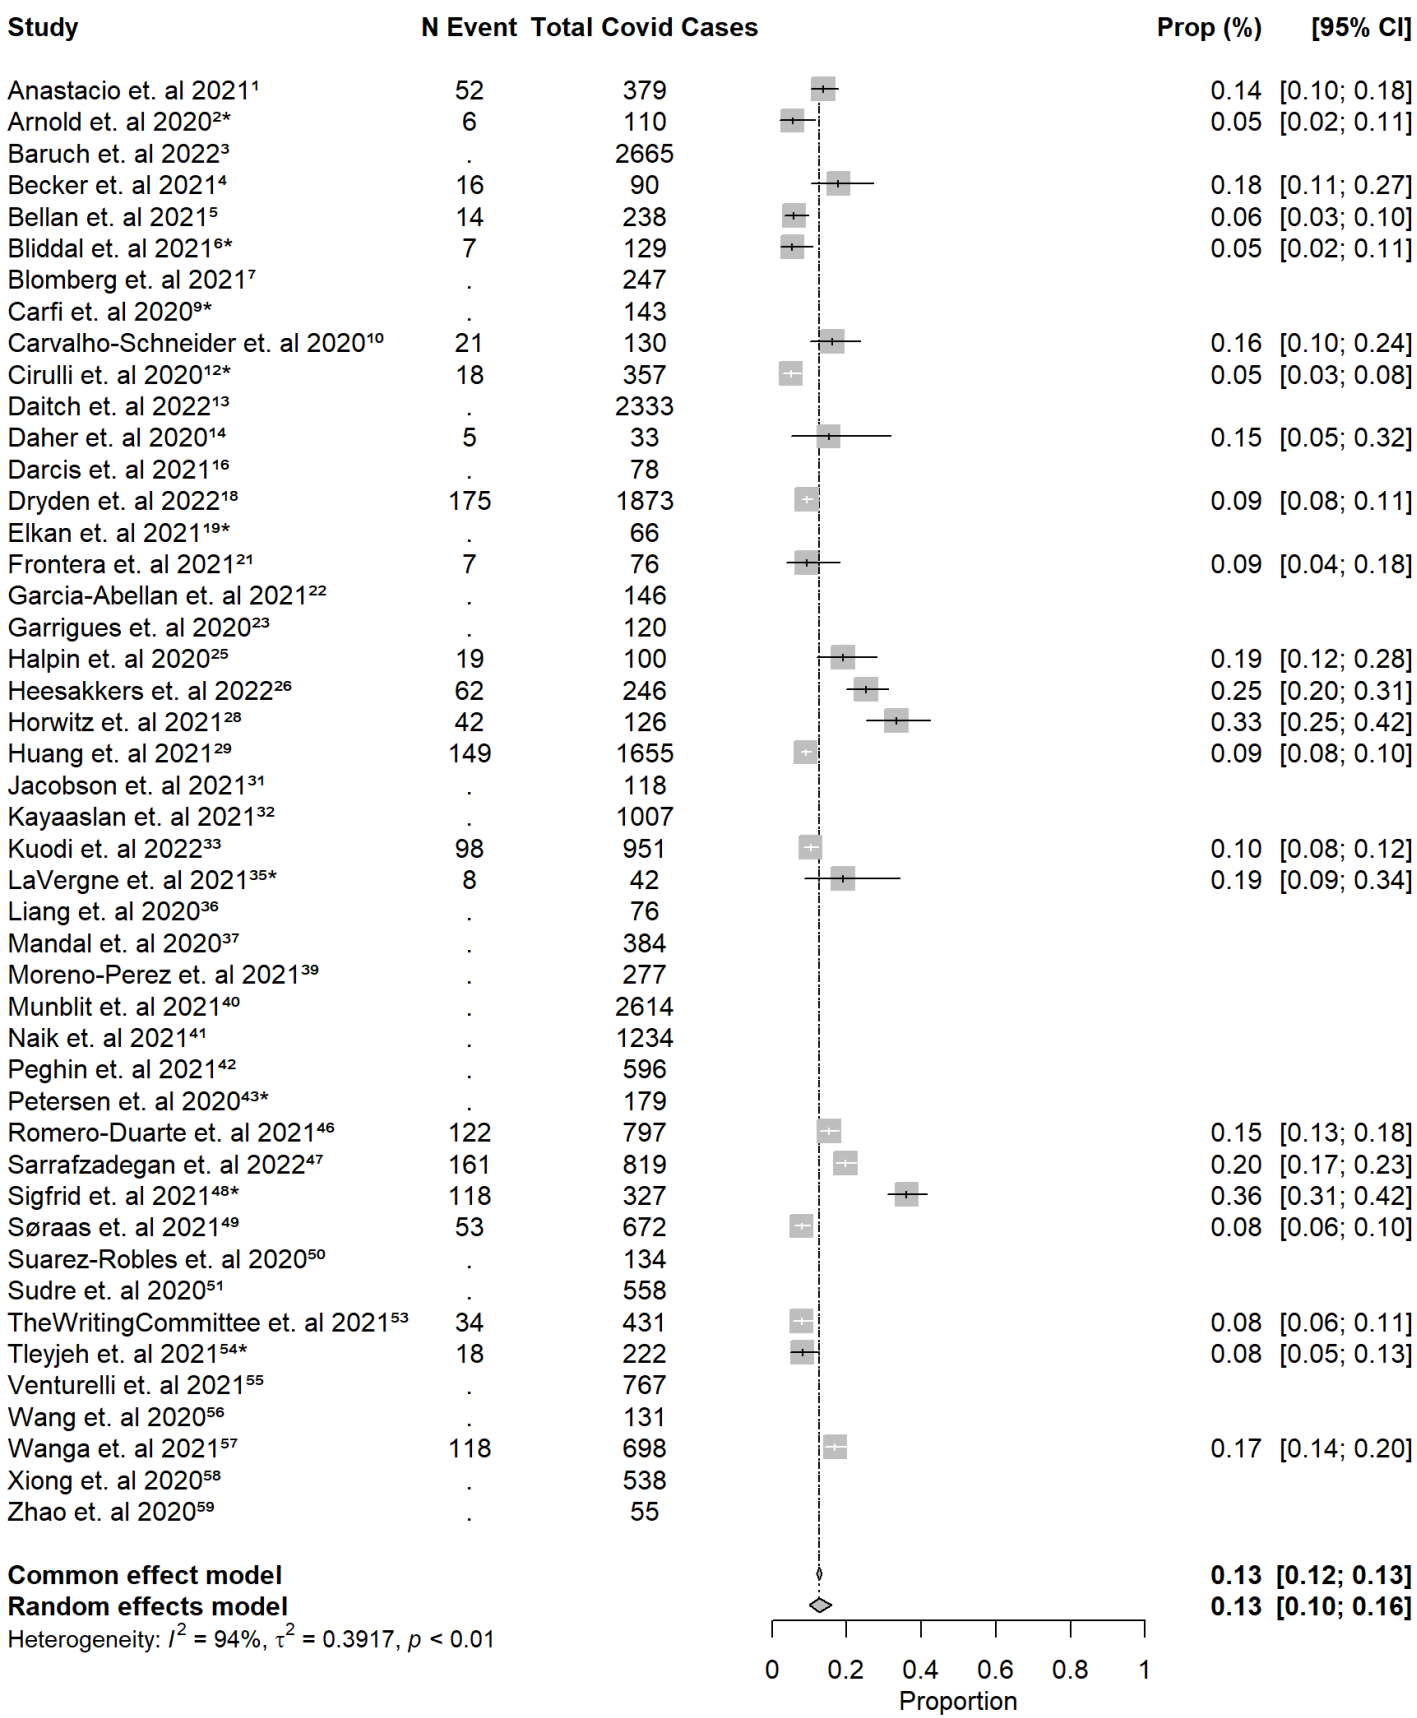

\* indicates value estimated from a figure

Analysis 1

Joint Muscle Pain: Long COVID

| Study                              | N Event | Total Covid Cases | Prop (%) | [95% CI]     |
|------------------------------------|---------|-------------------|----------|--------------|
| Buttery et. al 2021 <sup>8</sup>   | 984     | 1865              | 0.53     | [0.50; 0.55] |
| Danesh et. al 2022 <sup>15</sup>   | .       | 441               |          |              |
| Davis et. al 2021 <sup>17*</sup>   | 2633    | 3762              | 0.70     | [0.68; 0.71] |
| Goertz et. al 2020 <sup>24</sup>   | 1409    | 2113              | 0.67     | [0.65; 0.69] |
| Larson et. al 2022 <sup>34</sup>   | .       | 2314              |          |              |
| Reese et. al 2022 <sup>44</sup>    | 1082    | 2464              | 0.44     | [0.42; 0.46] |
| Tabacof et. al 2022 <sup>52*</sup> | 51      | 156               | 0.33     | [0.25; 0.41] |

Common effect model

Random effects model

Heterogeneity:  $I^2 = 99\%$ ,  $\tau^2 = 0.3221$ ,  $p < 0.01$

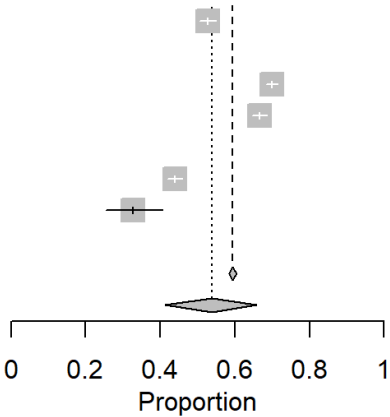

\* indicates value estimated from a figure

Analysis 1  
Joint Muscle Pain: EHR

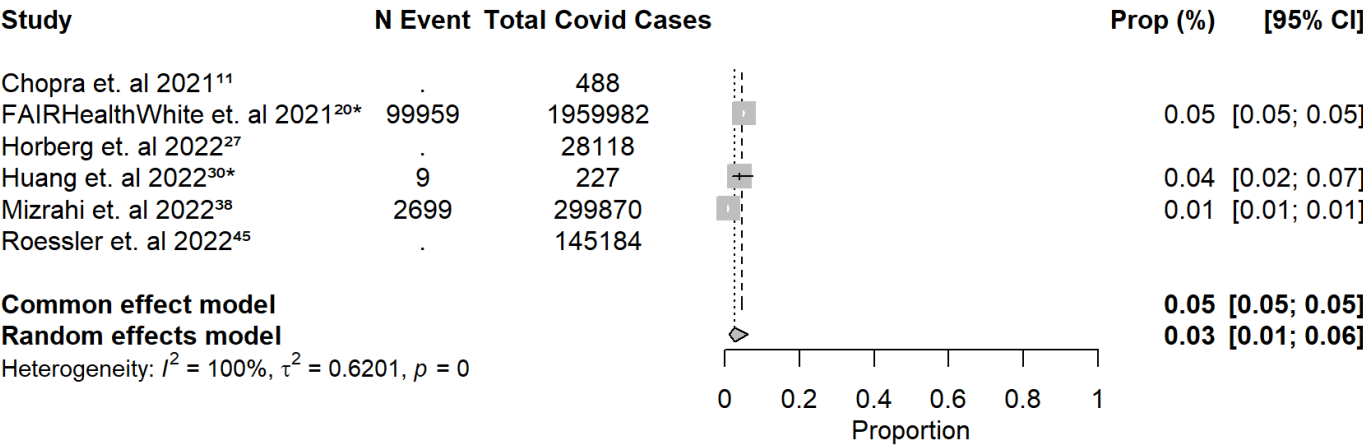

\* indicates value estimated from a figure

# Weakness In Arms Or Legs:

## Analysis 1 Weakness In Arms Or Legs: Survey

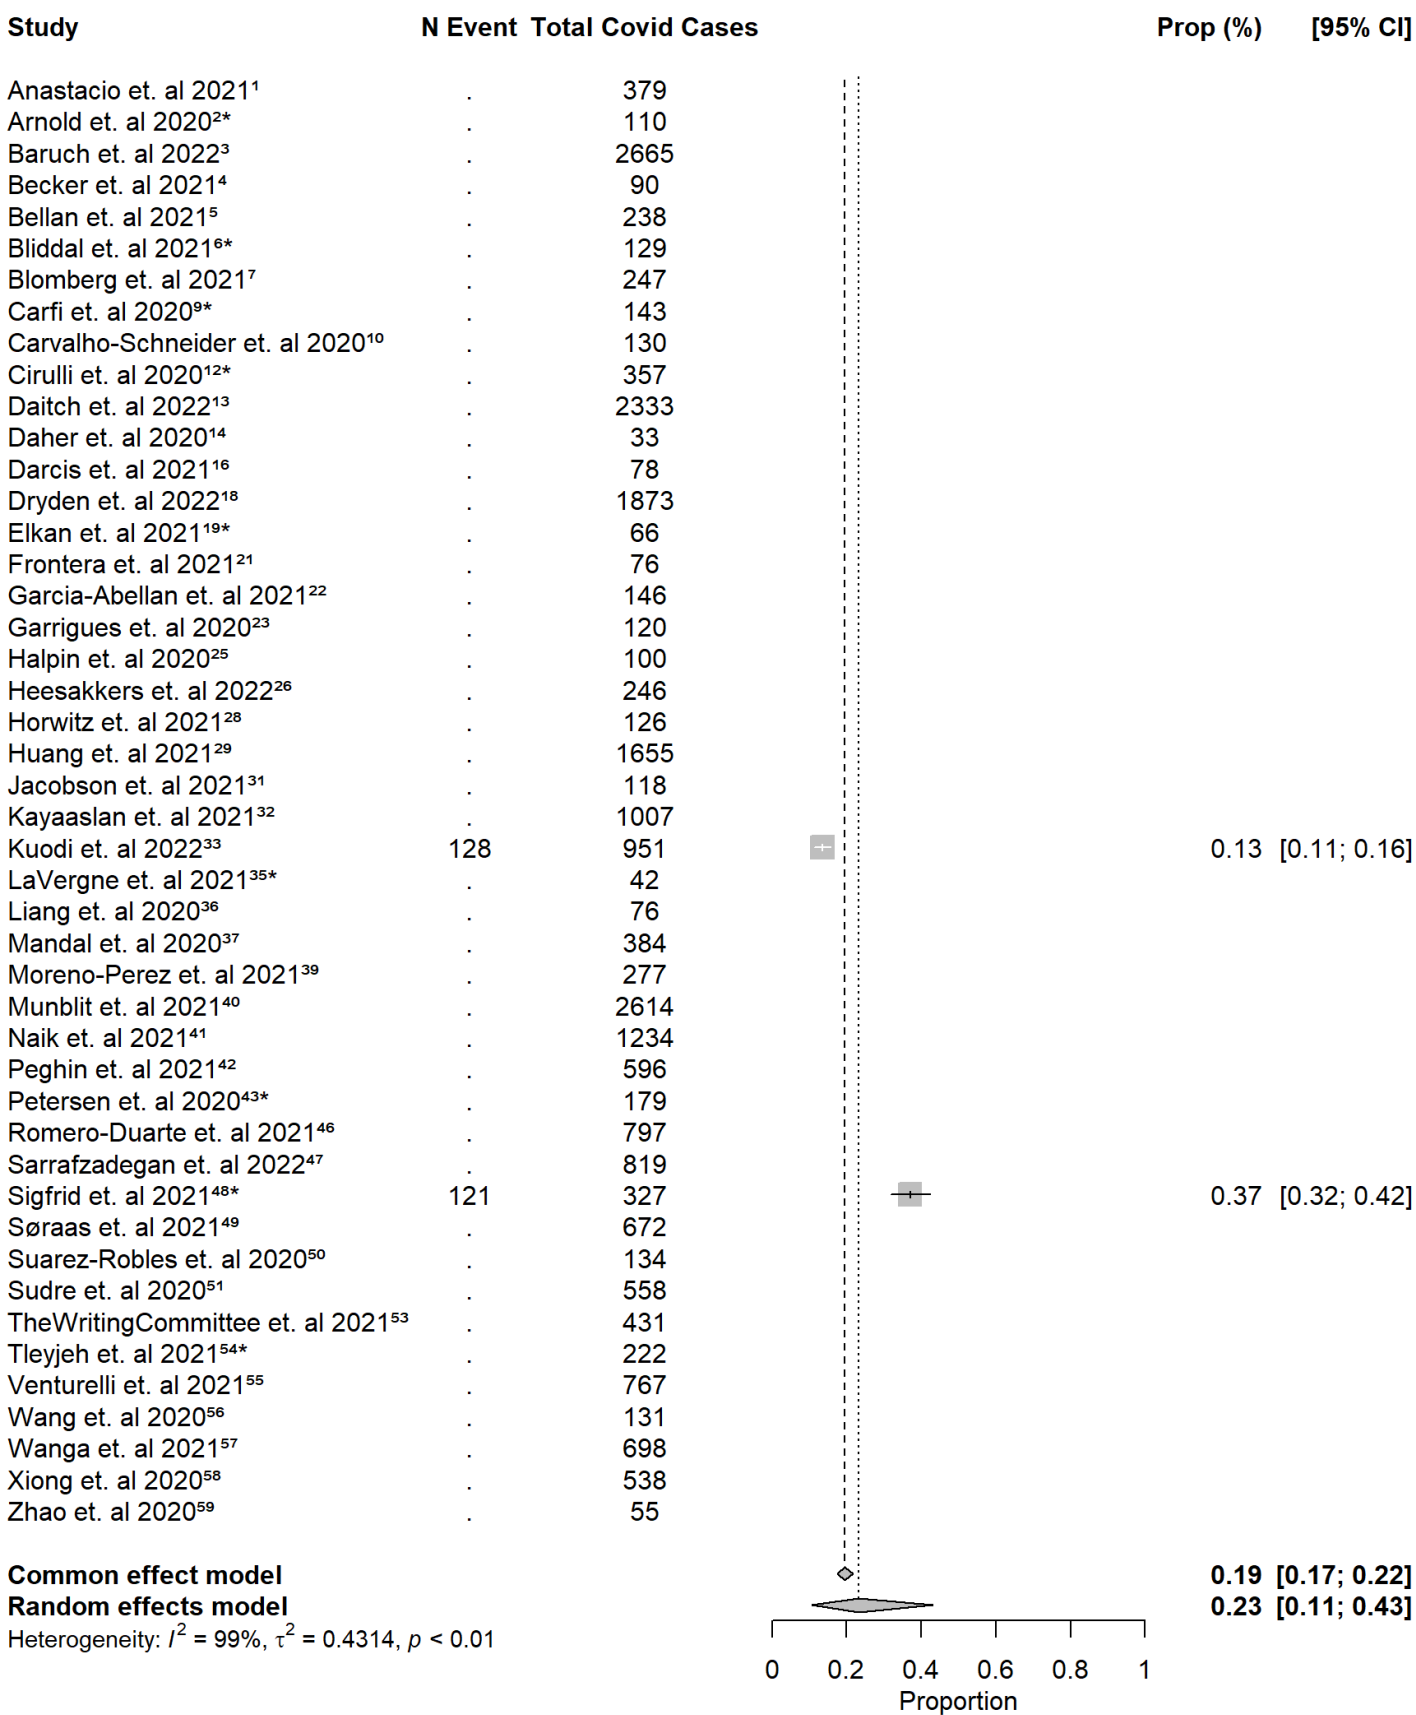

\* indicates value estimated from a figure



Analysis 1  
Weakness In Arms Or Legs: EHR

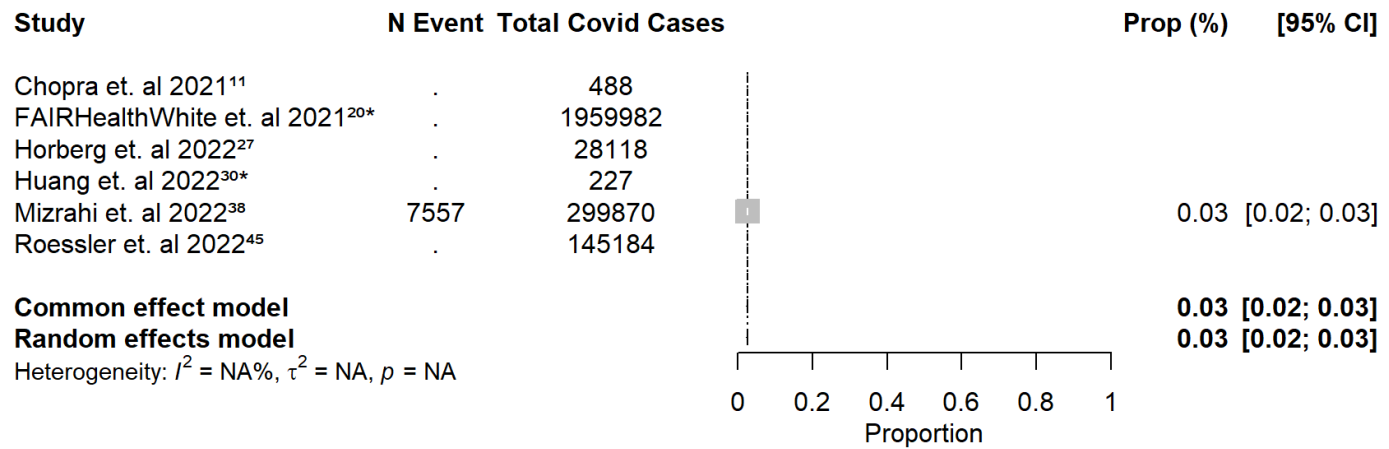

\* indicates value estimated from a figure

# Gi Symptoms Including Abdominal Pain:

## Analysis 1

### Gi Symptoms Including Abdominal Pain: Survey

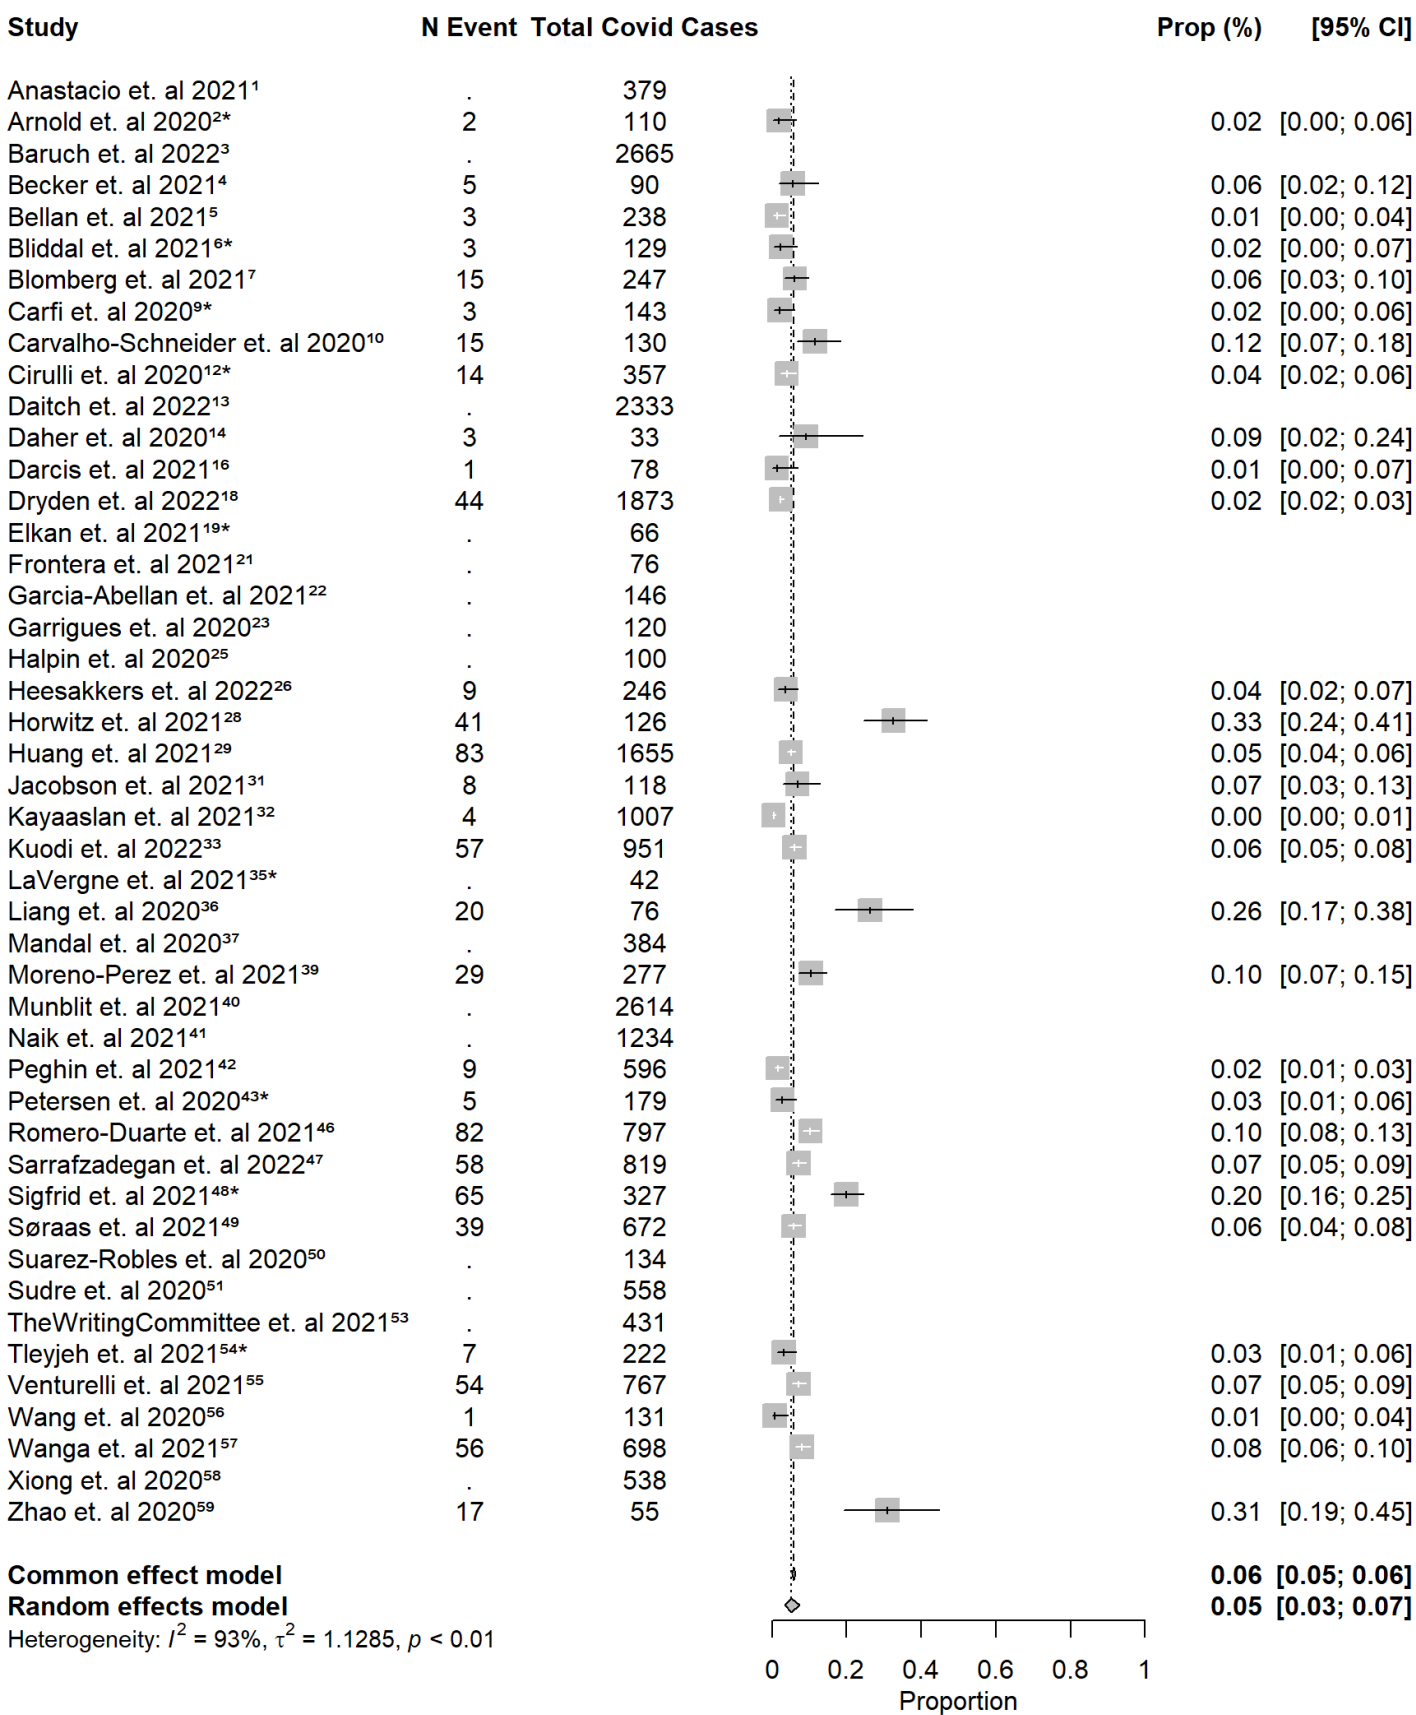

\* indicates value estimated from a figure

Analysis 1

Gi Symptoms Including Abdominal Pain: Long COVID

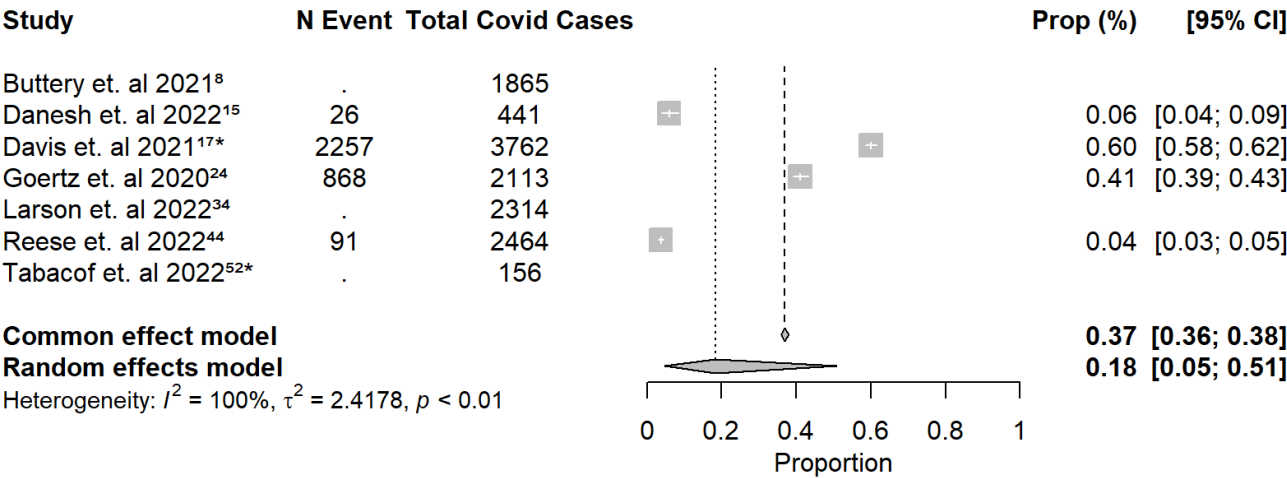

\* indicates value estimated from a figure

Analysis 1  
Gi Symptoms Including Abdominal Pain: EHR

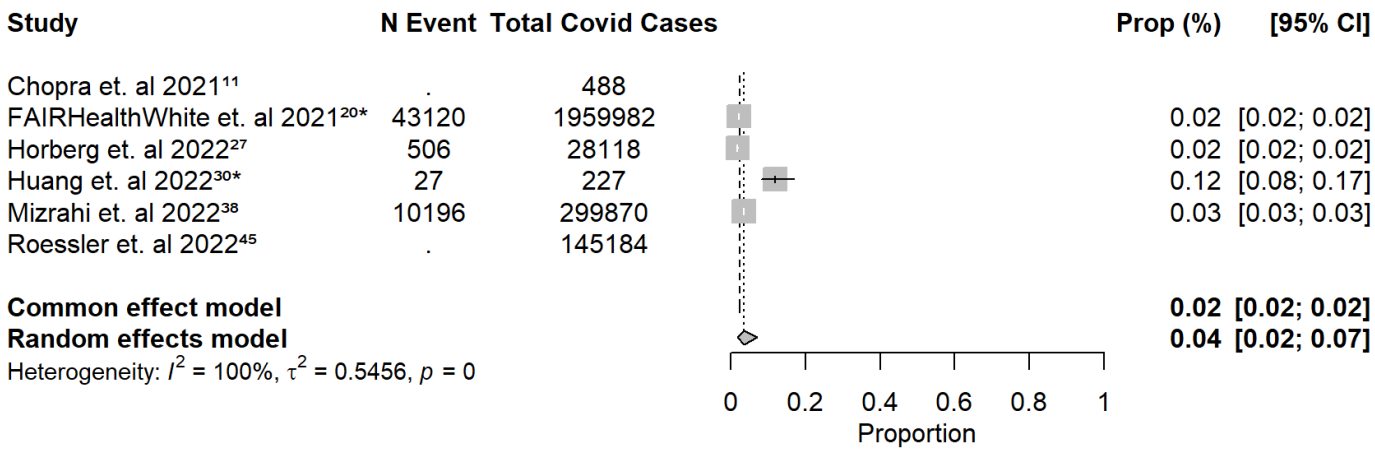

\* indicates value estimated from a figure

# Urinary Symptoms:

## Analysis 1 Urinary Symptoms: Survey

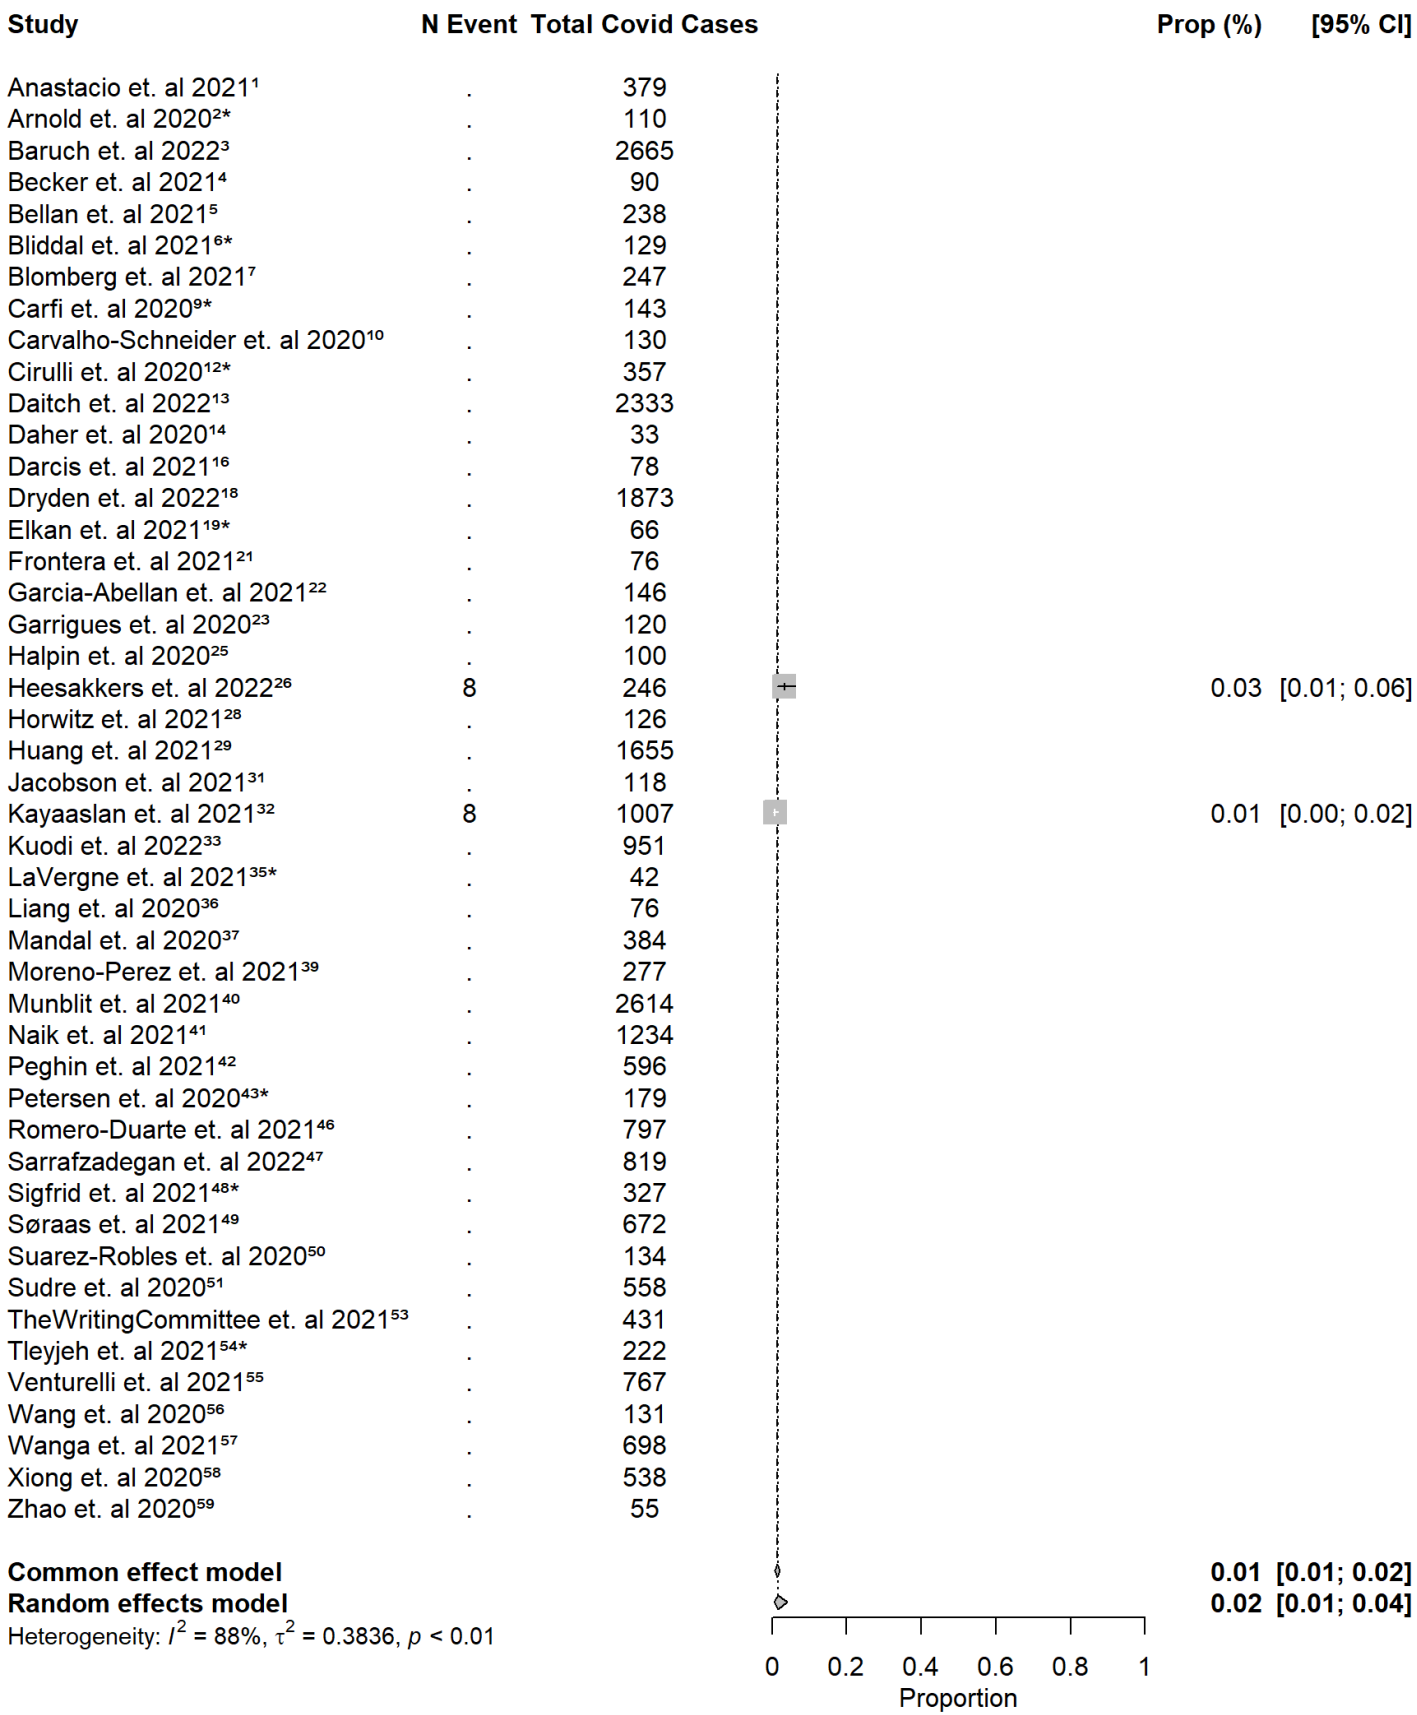

\* indicates value estimated from a figure

Analysis 1  
Urinary Symptoms: EHR

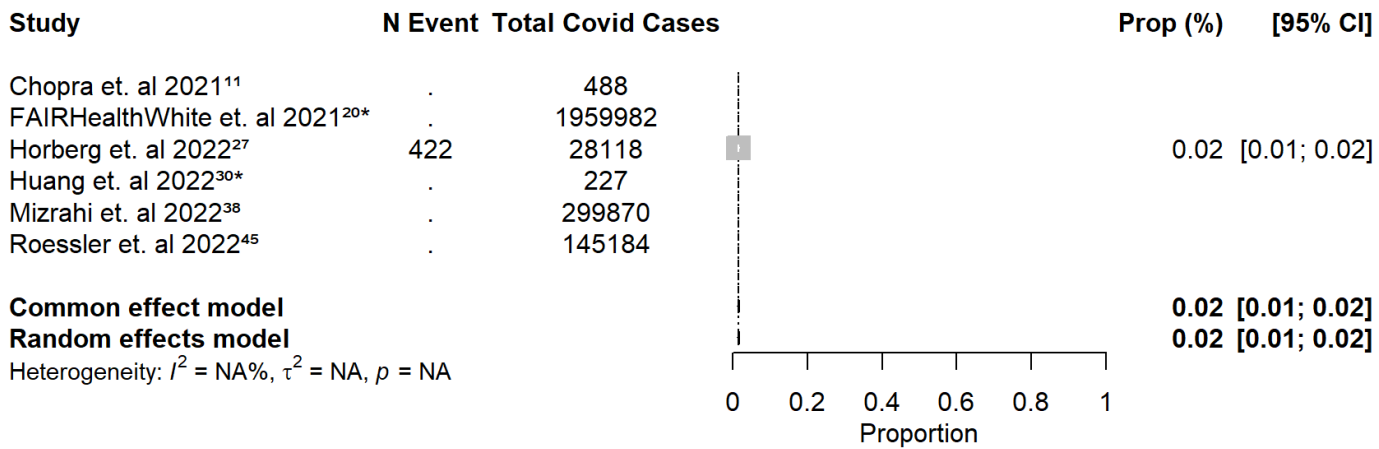

\* indicates value estimated from a figure

Hair Loss:

Analysis 1  
Hair Loss: Survey

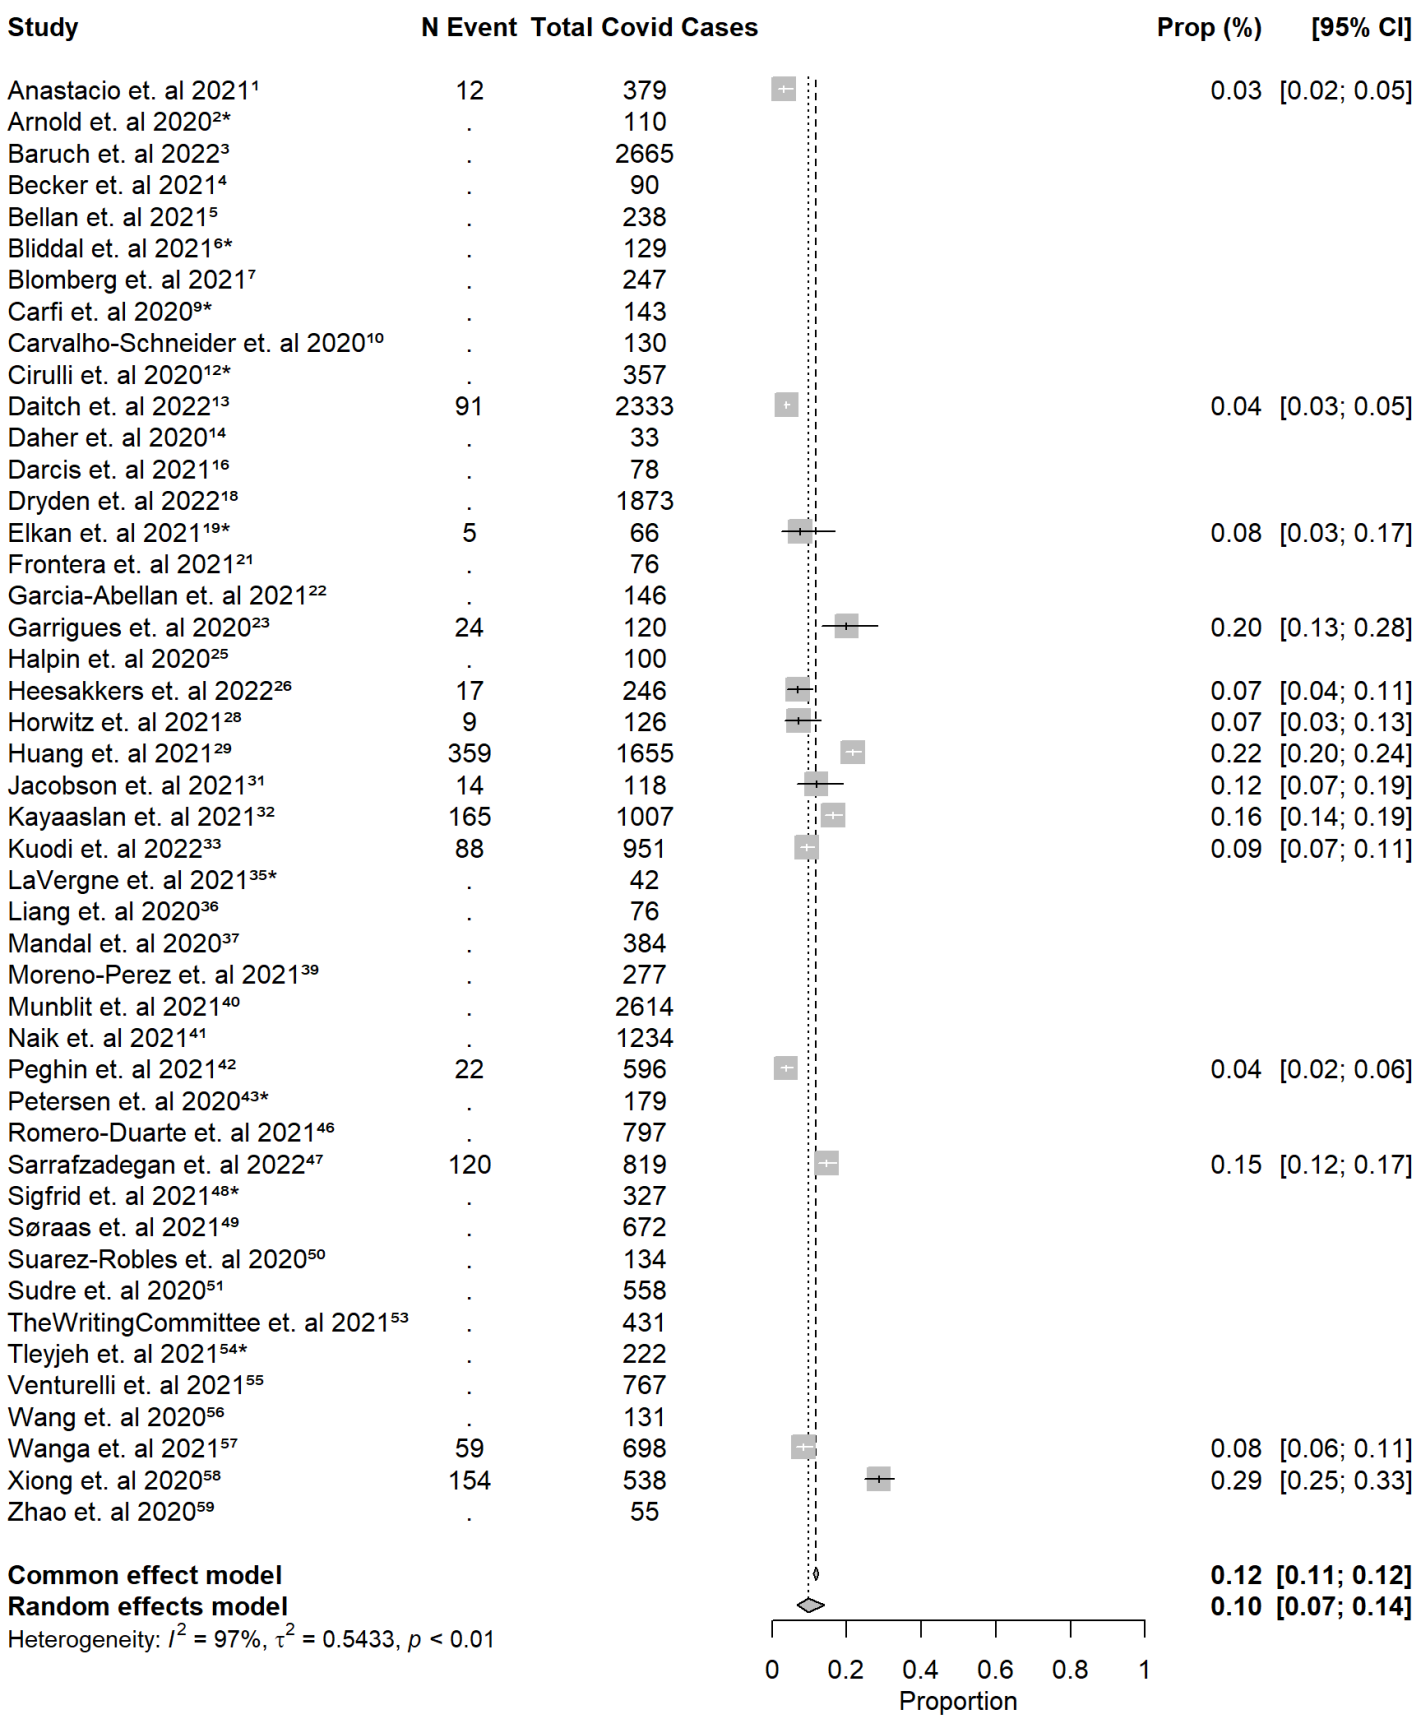

\* indicates value estimated from a figure

Analysis 1  
Hair Loss: Long COVID

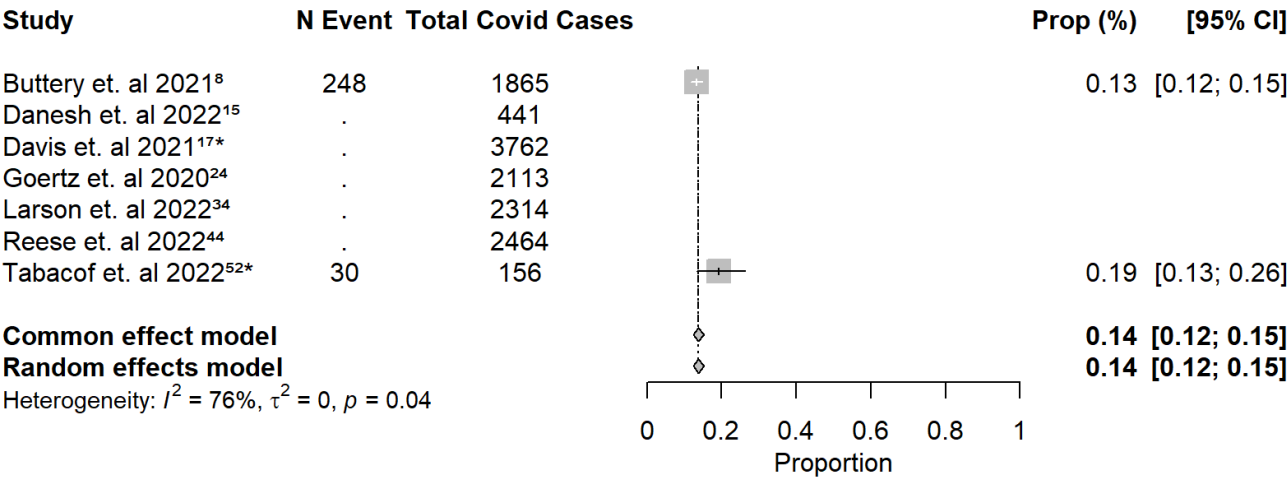

\* indicates value estimated from a figure



Analysis 1  
Hair Loss: EHR

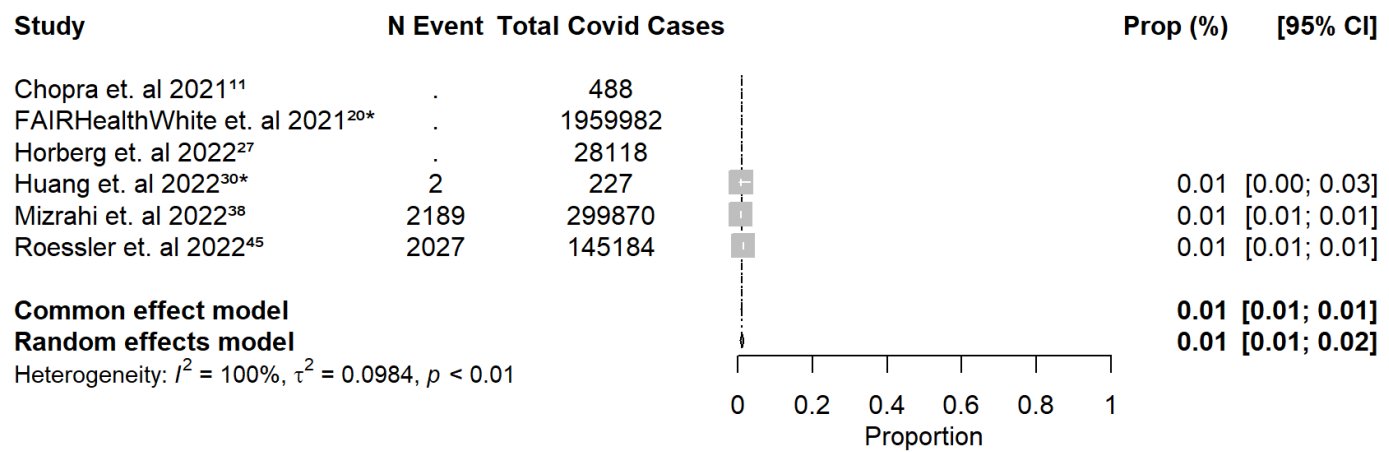

\* indicates value estimated from a figure

Skin Rash:

Analysis 1  
Skin Rash: Survey

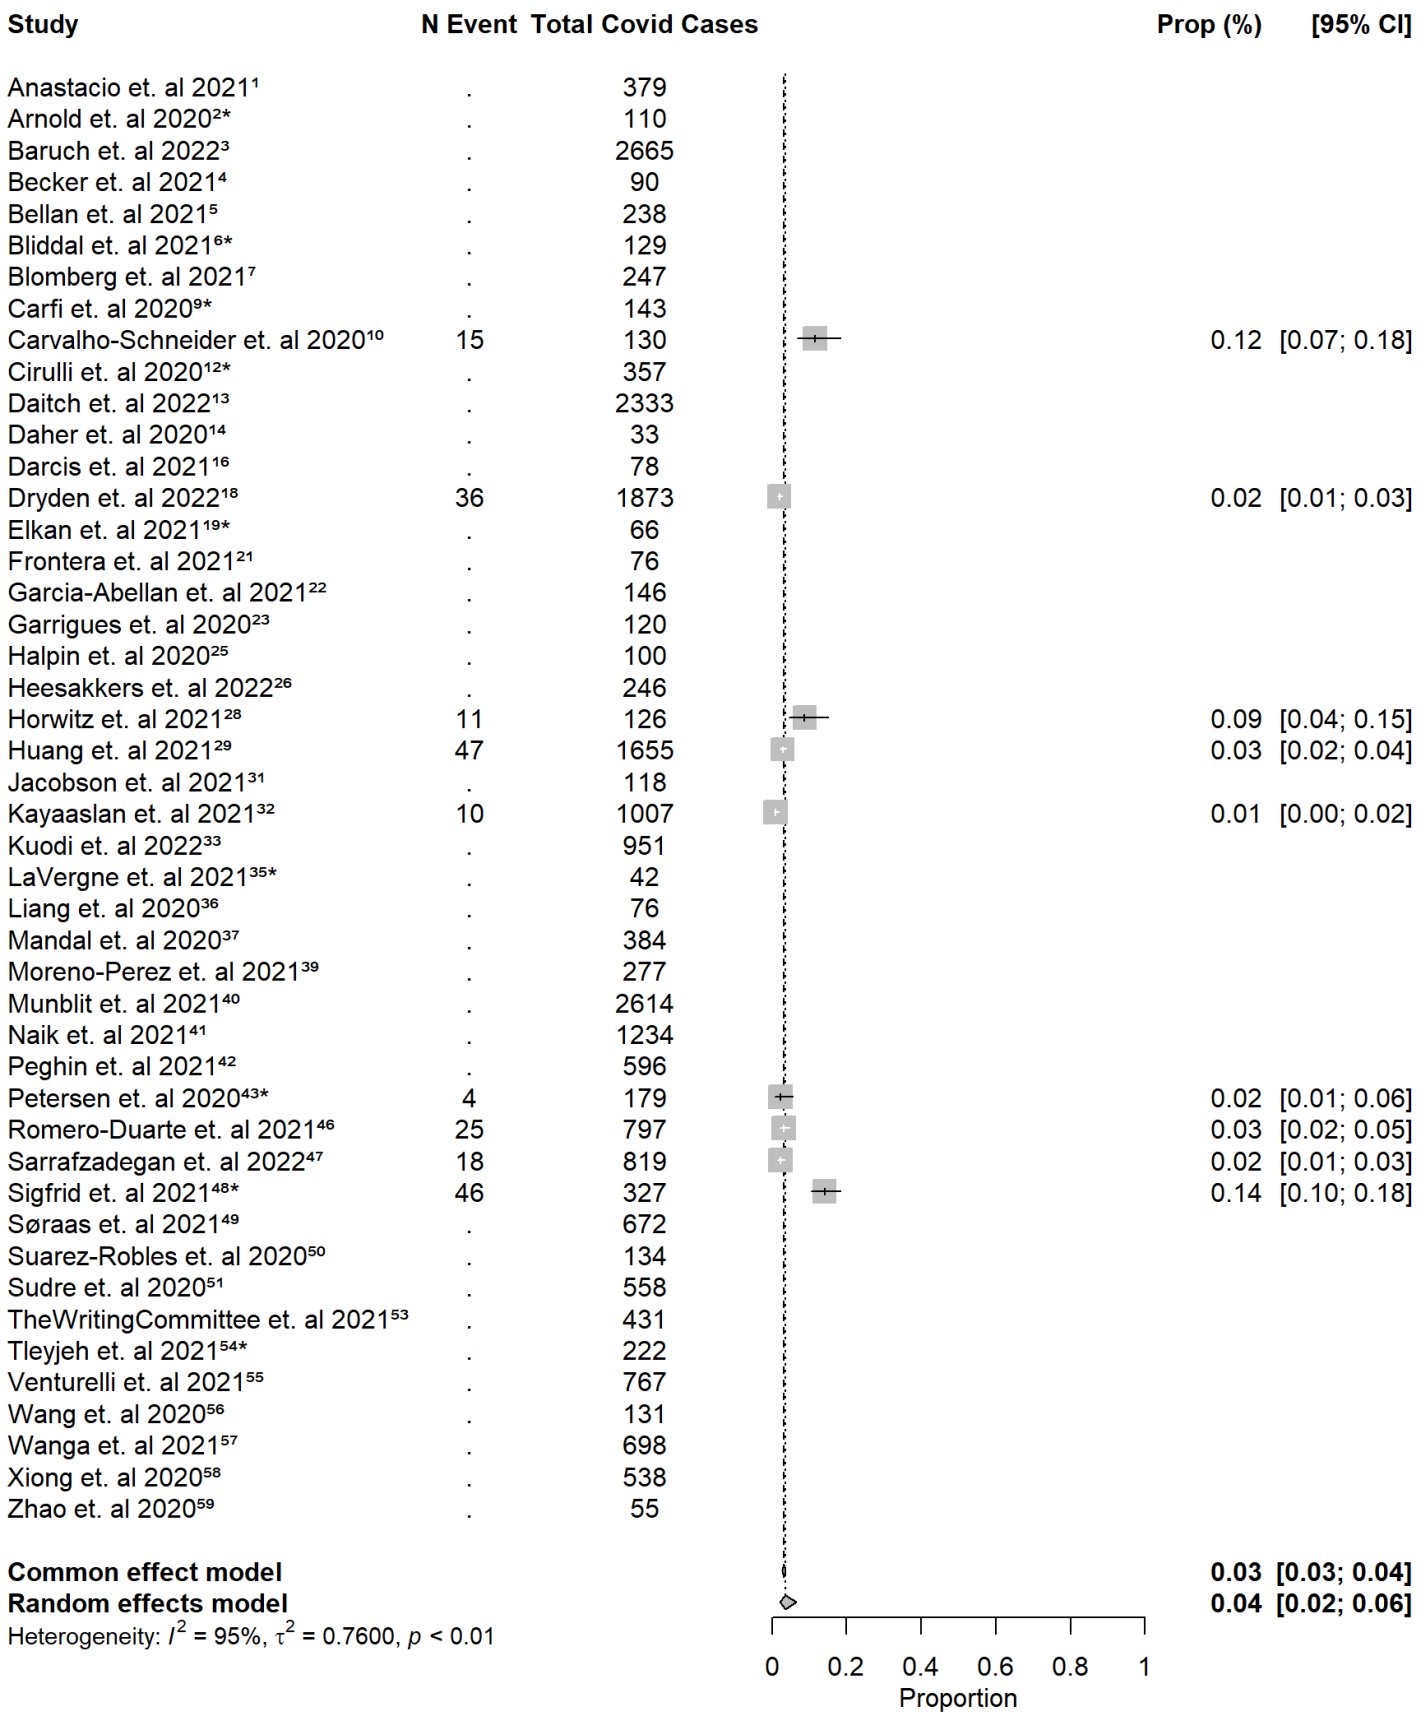

\* indicates value estimated from a figure

Analysis 1  
Skin Rash: EHR

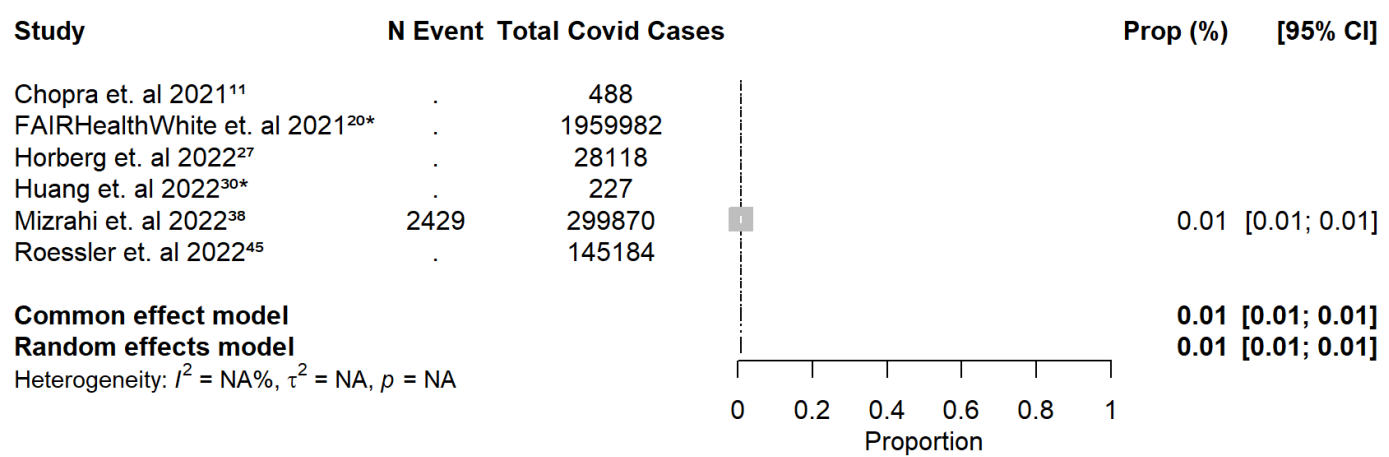

\* indicates value estimated from a figure

# Hearing Problems:

## Analysis 1 Hearing Problems: Survey

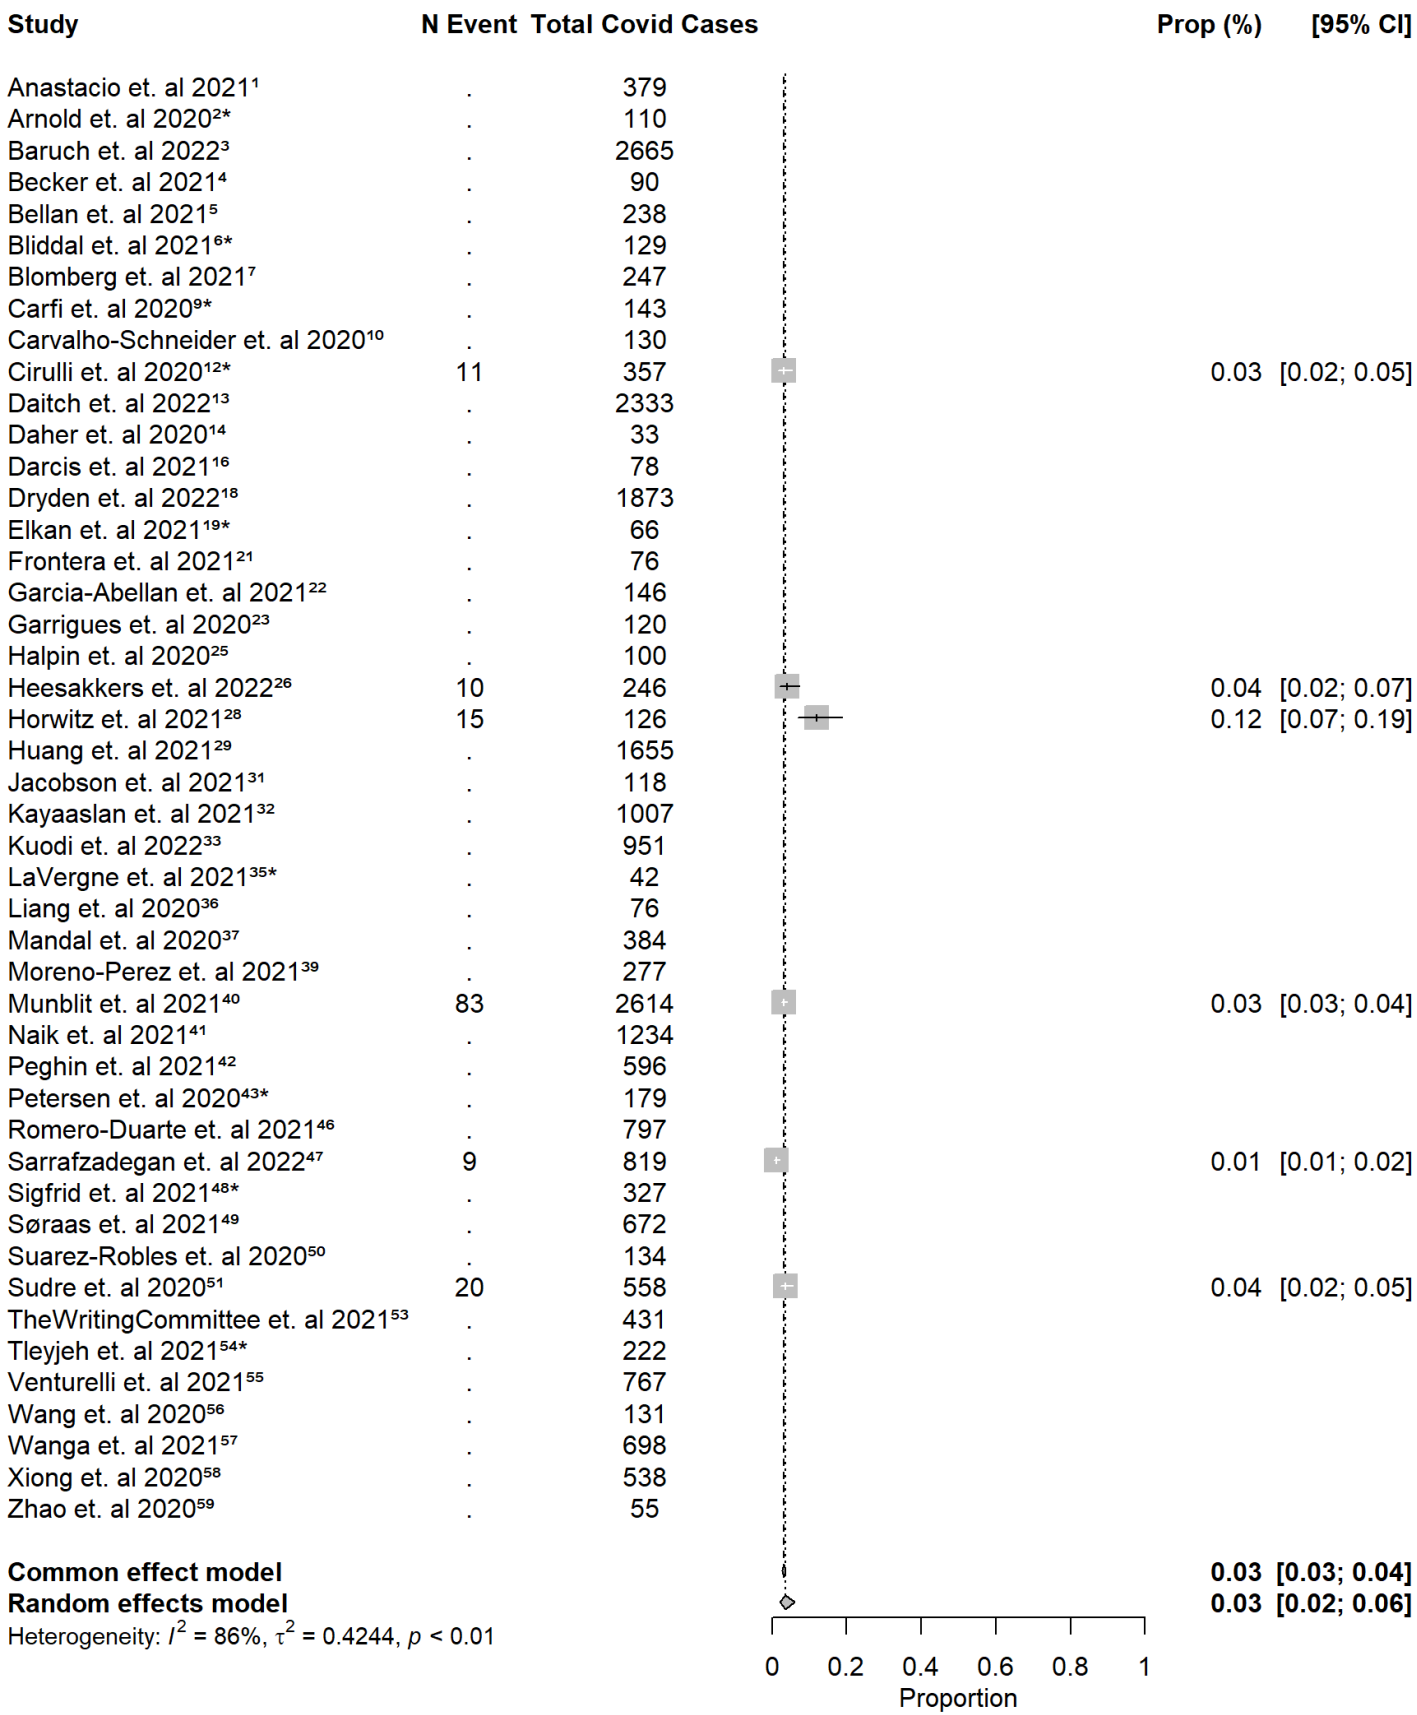

\* indicates value estimated from a figure

Analysis 1  
Hearing Problems: Long COVID

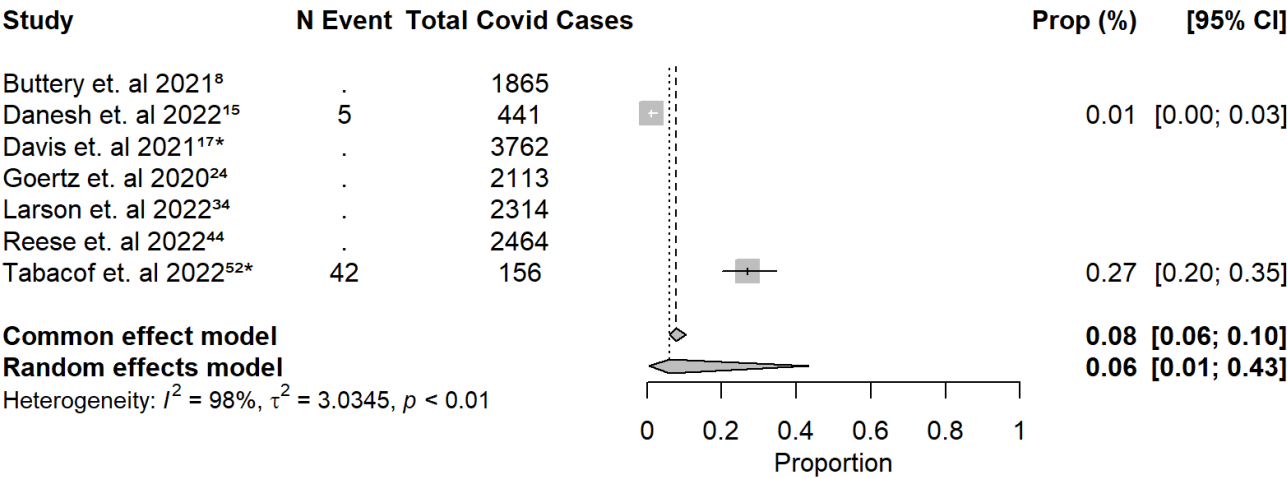

\* indicates value estimated from a figure

Analysis 1  
Hearing Problems: EHR

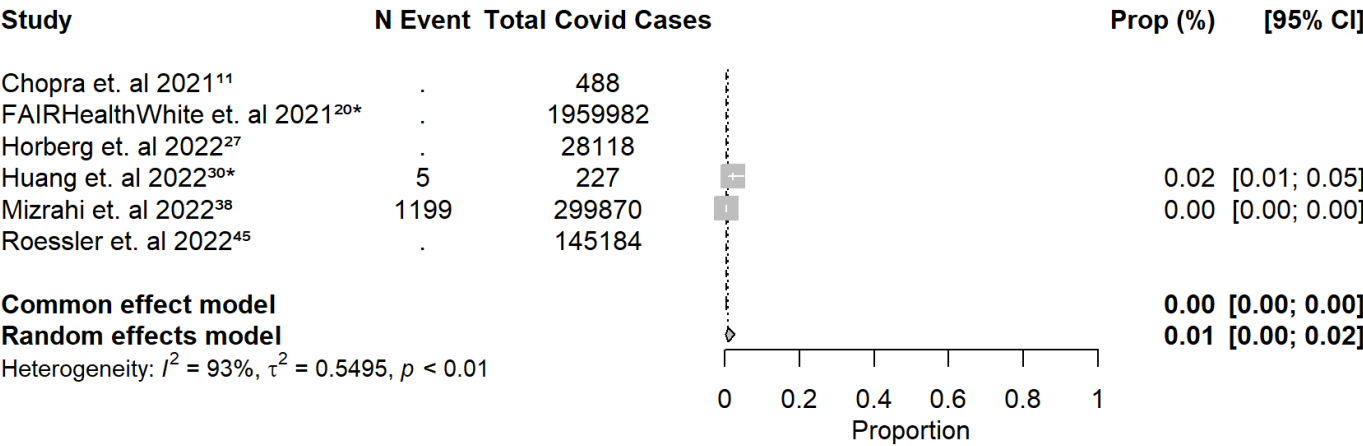

\* indicates value estimated from a figure

Vision Problems:

Analysis 1  
Vision Problems: Survey

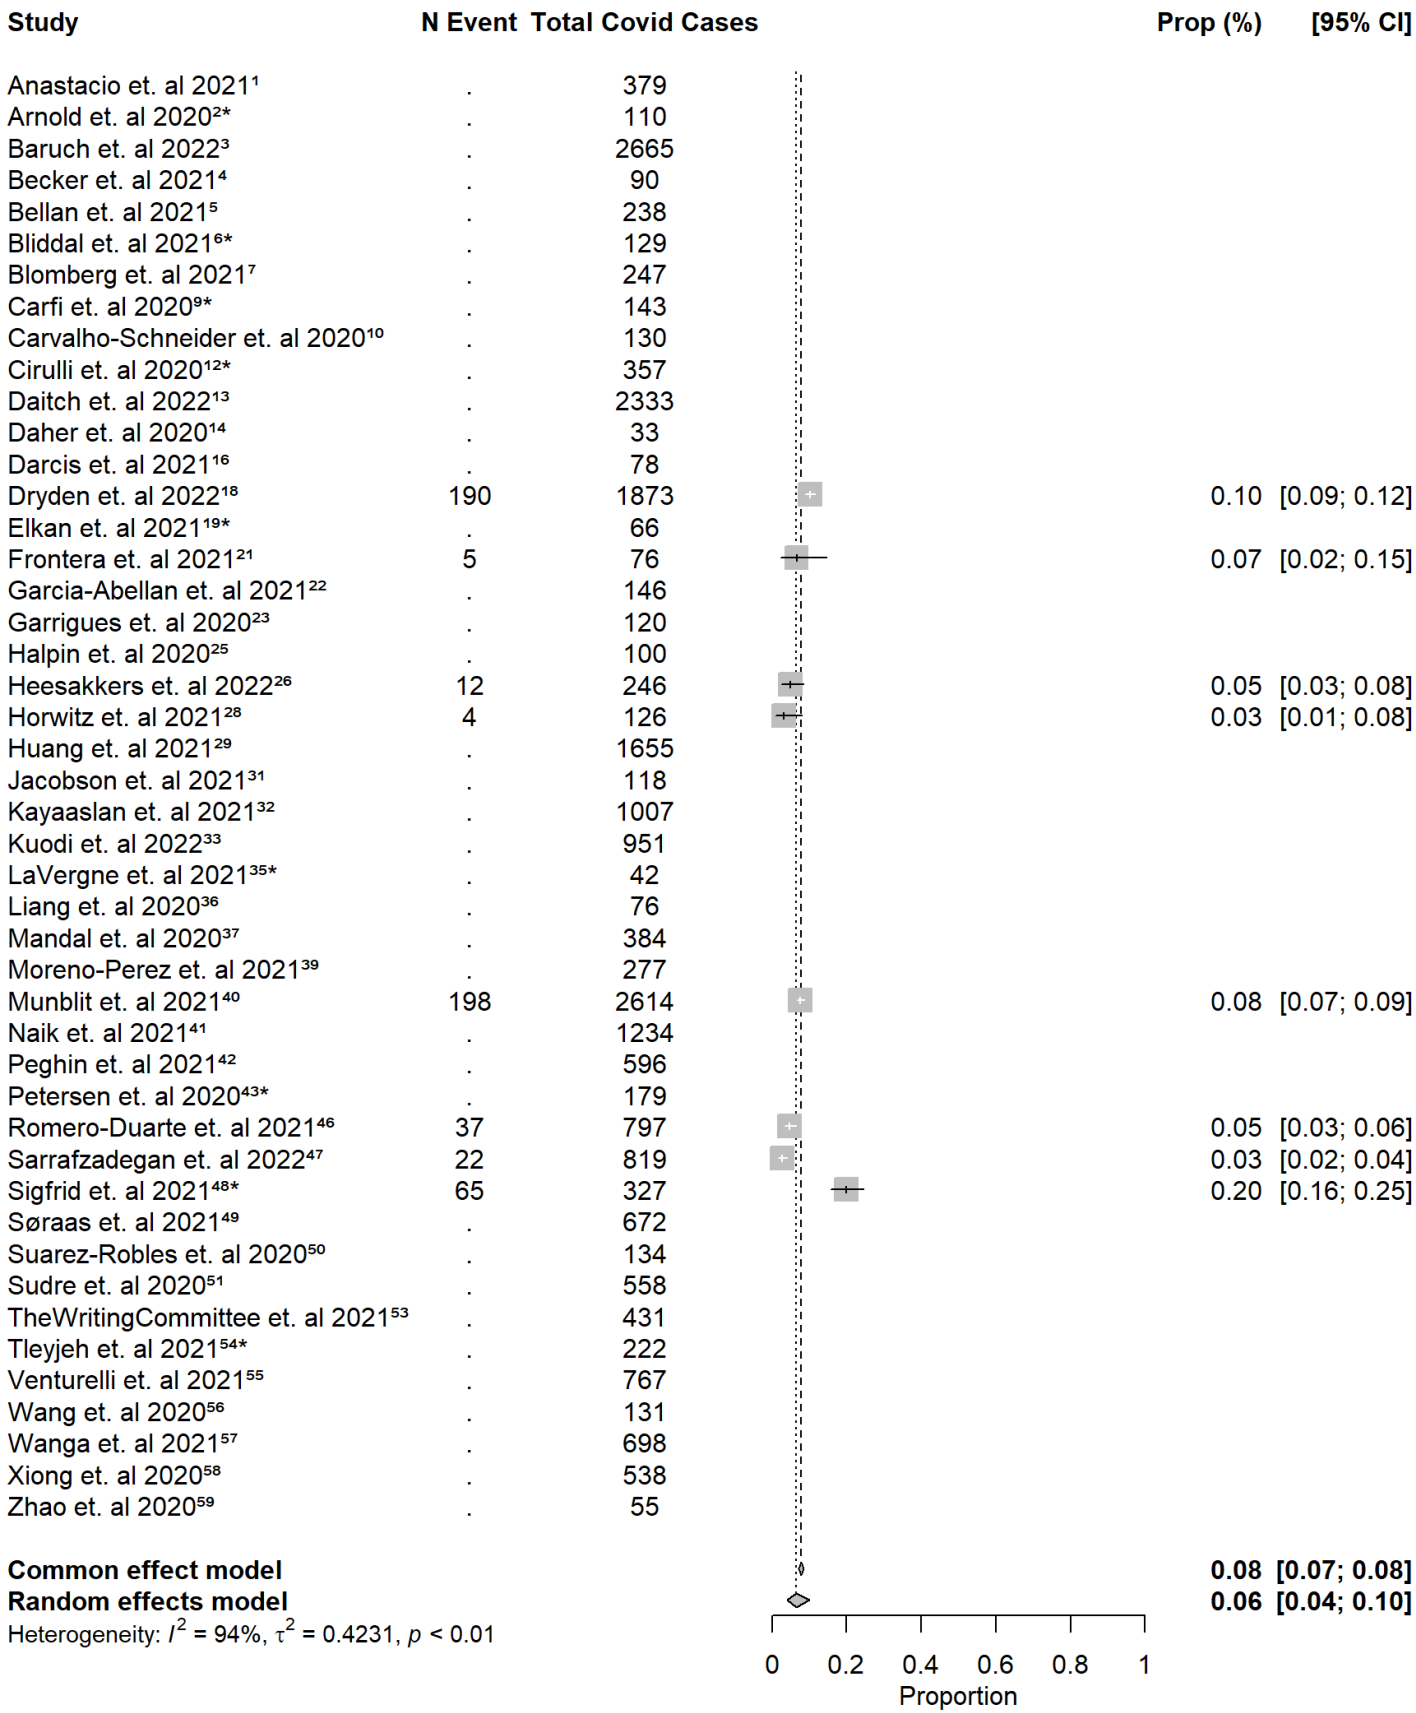

\* indicates value estimated from a figure

Analysis 1  
Vision Problems: Long COVID

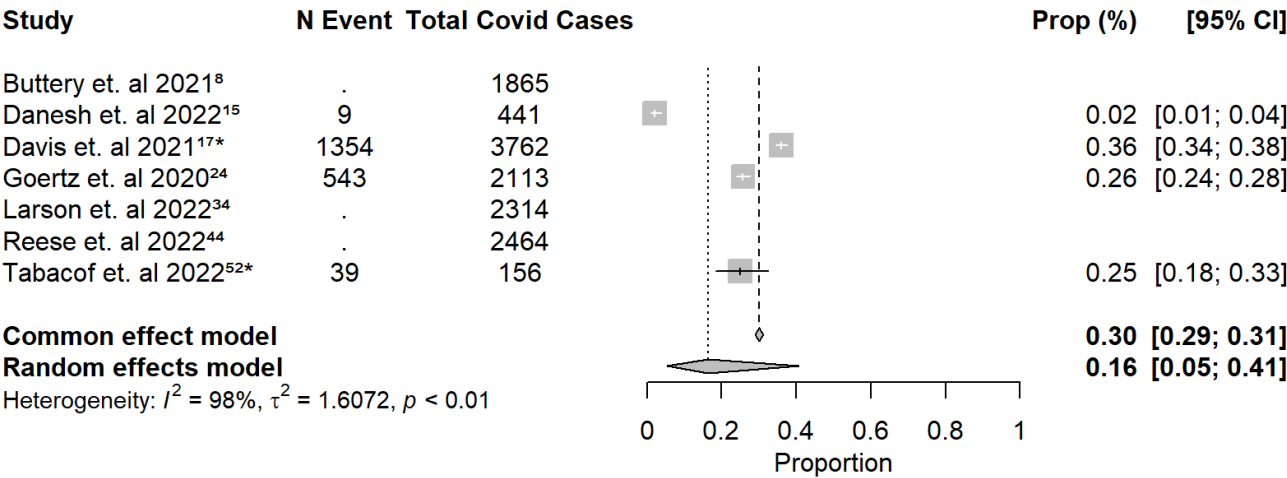

\* indicates value estimated from a figure



Analysis 1  
Vision Problems: EHR

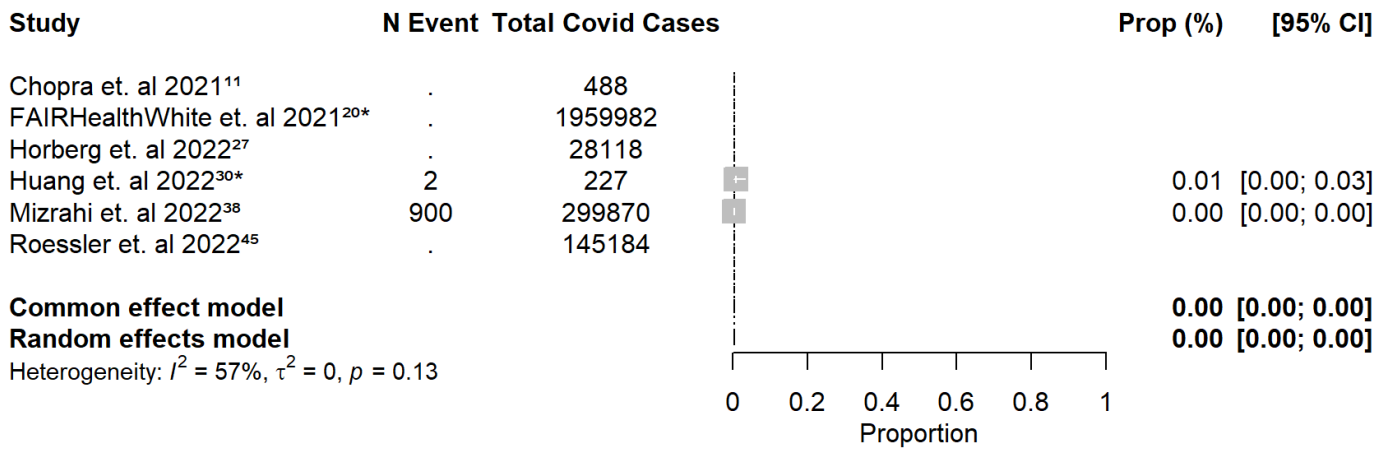

\* indicates value estimated from a figure

# Analysis 2, stratified by Risk of Bias High, Risk of Bias Moderate, Risk of Bias Low

Fatigue:

Analysis 2  
Fatigue: Risk of Bias High

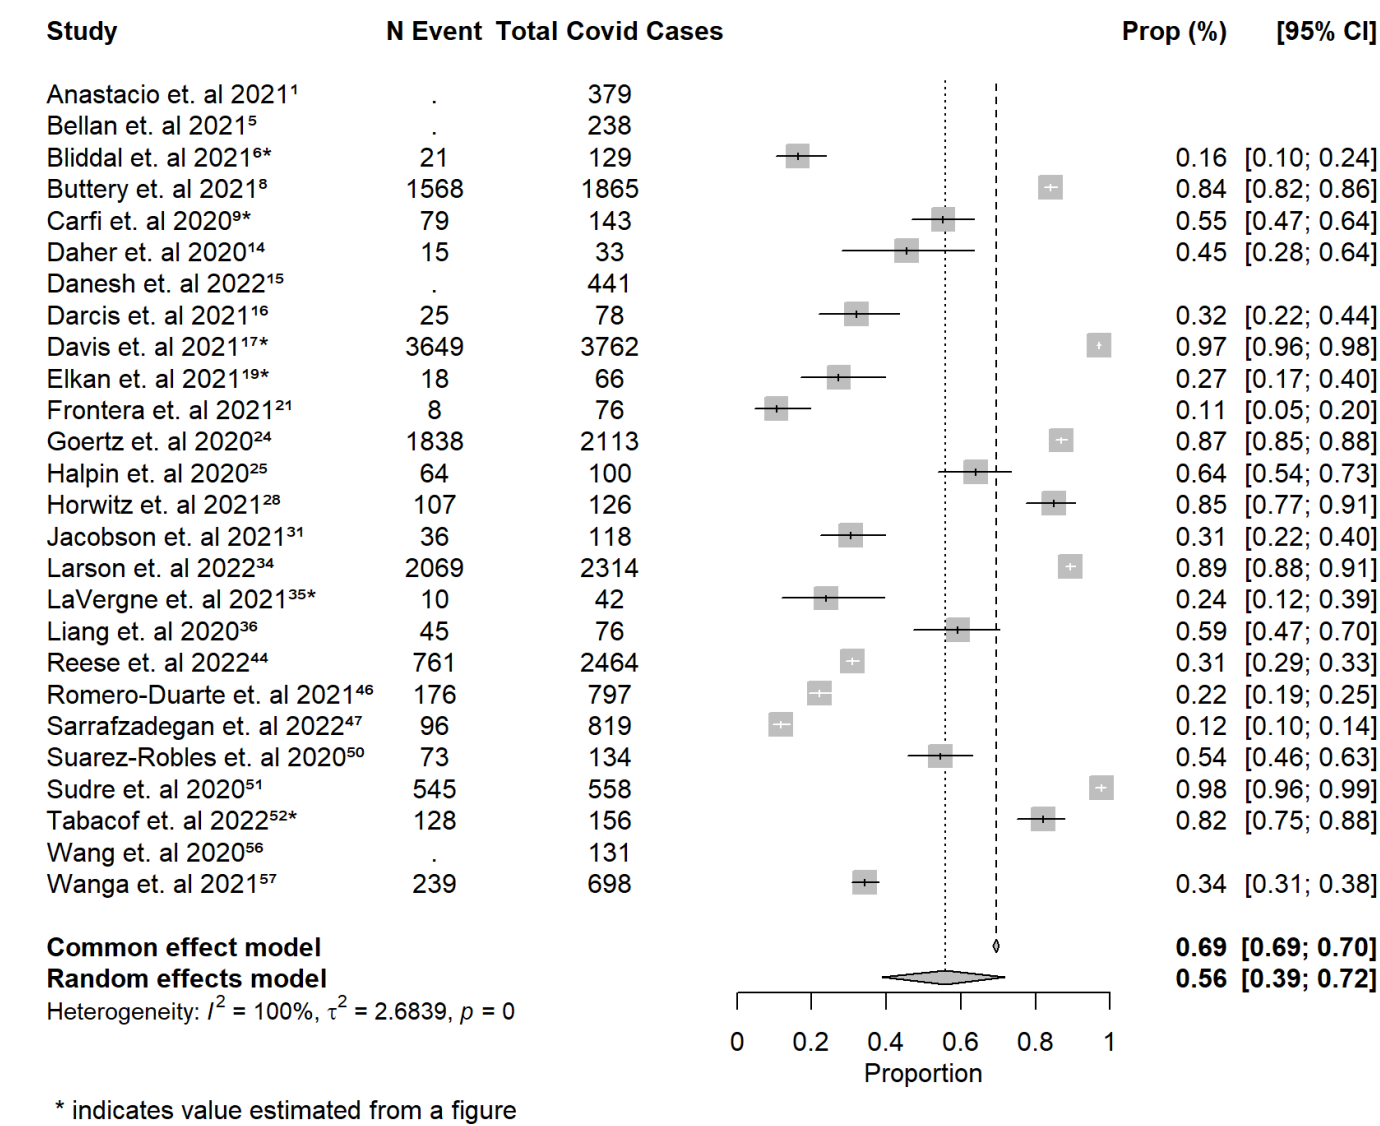

Analysis 2  
Fatigue: Risk of Bias Moderate

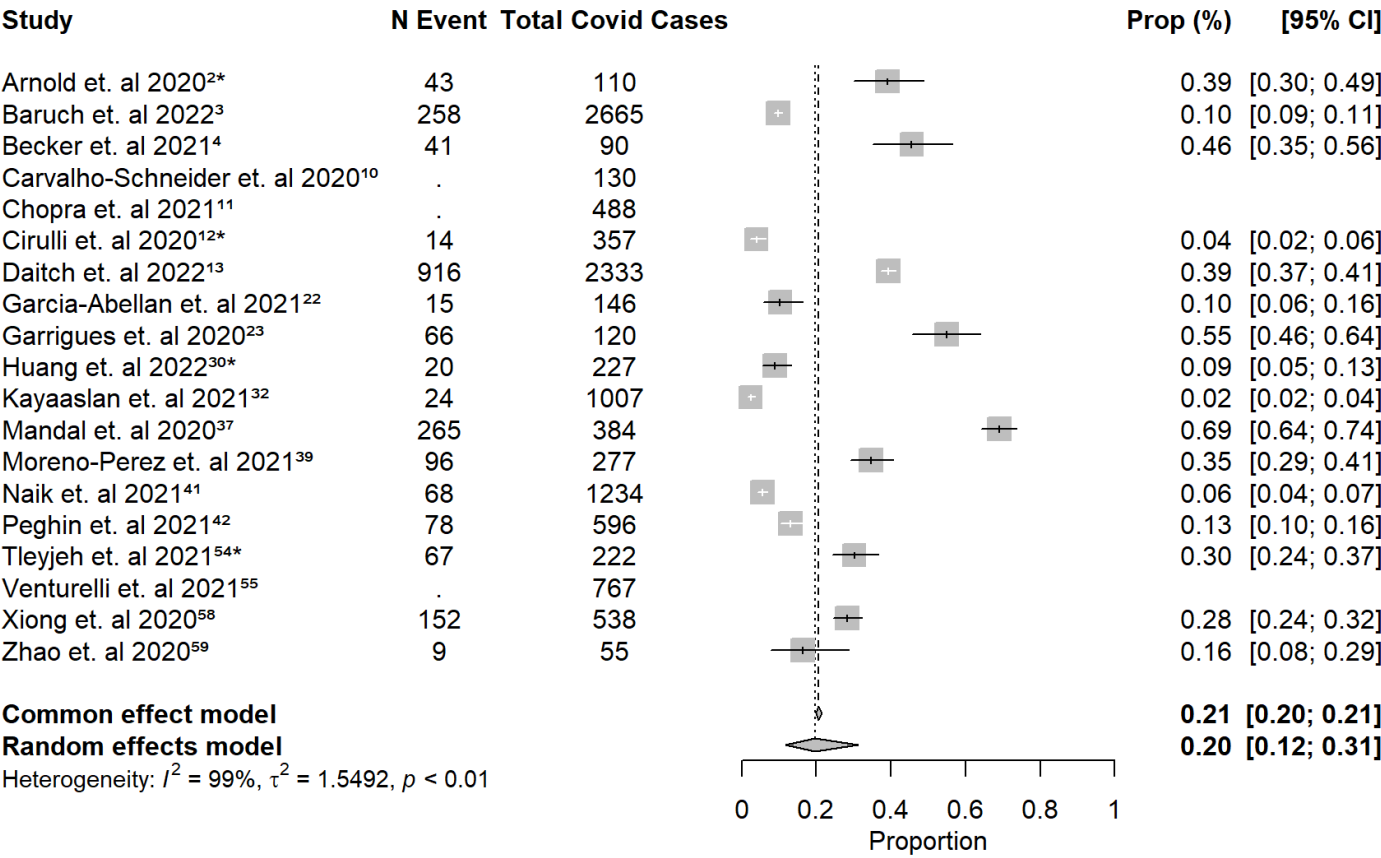

\* indicates value estimated from a figure

Analysis 2

Fatigue: Risk of Bias Low

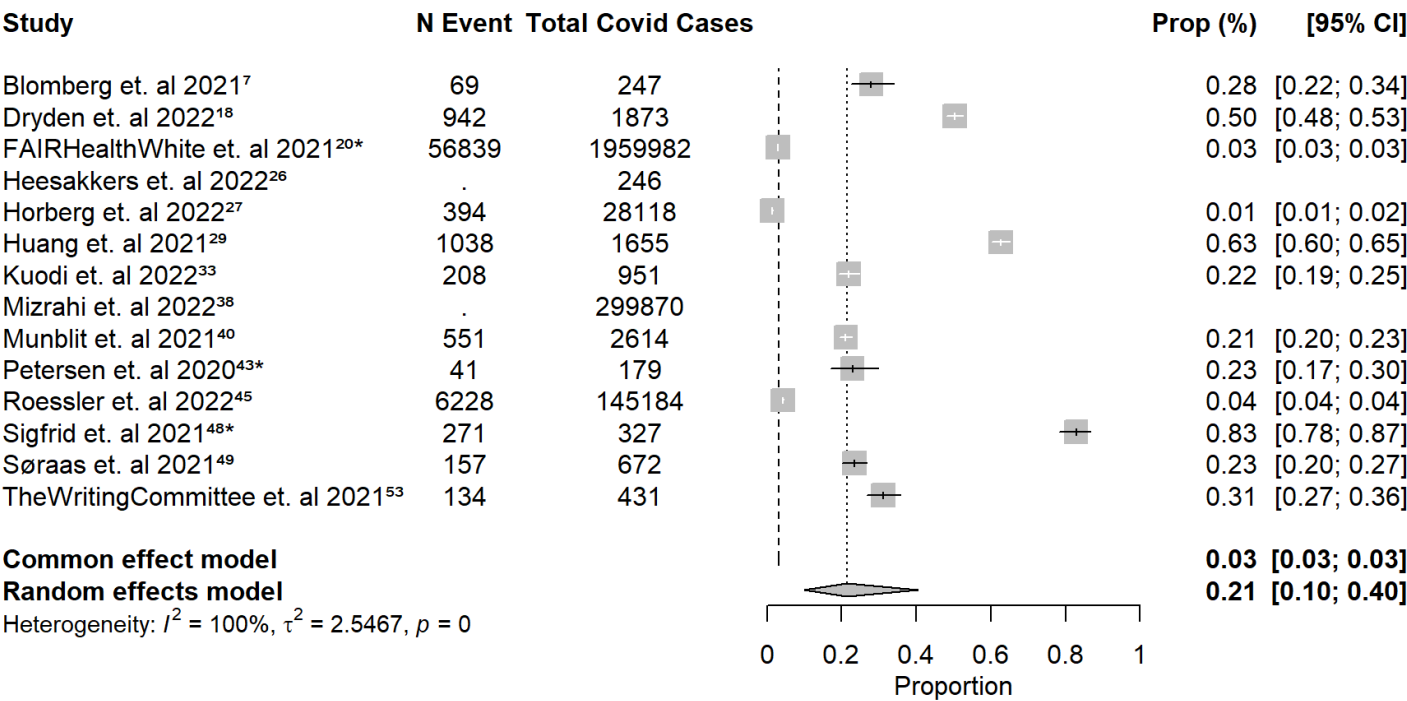

\* indicates value estimated from a figure

# Fever Chills Sweats Or Flushing:

## Analysis 2 Fever Chills Sweats Or Flushing: Risk of Bias High

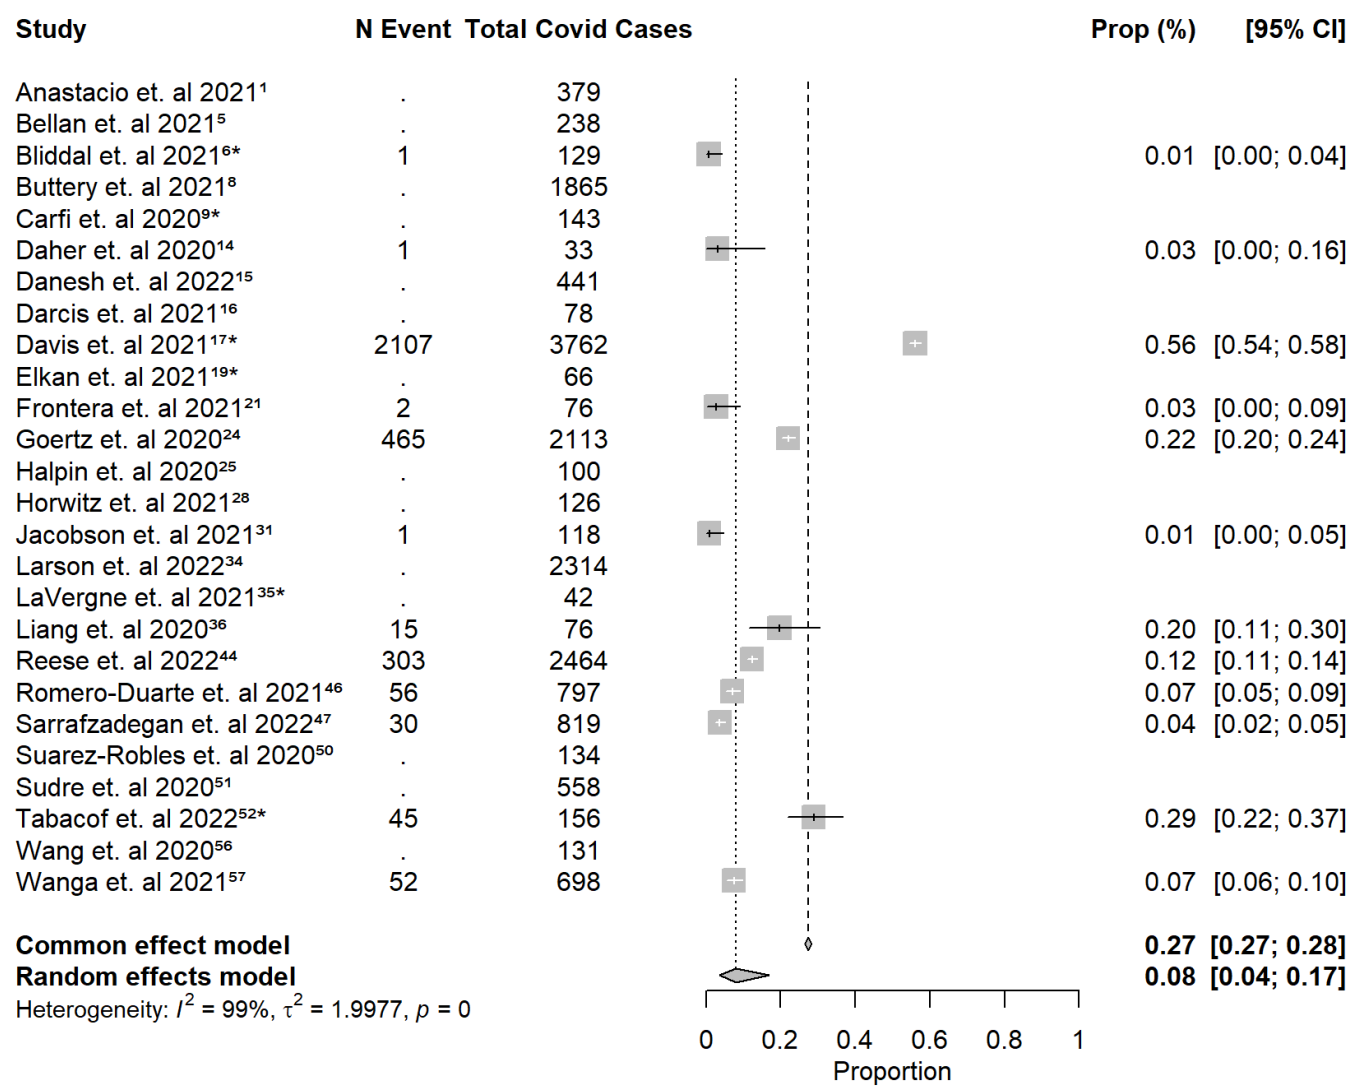

\* indicates value estimated from a figure

## Analysis 2

### Fever Chills Sweats Or Flushing: Risk of Bias Moderate

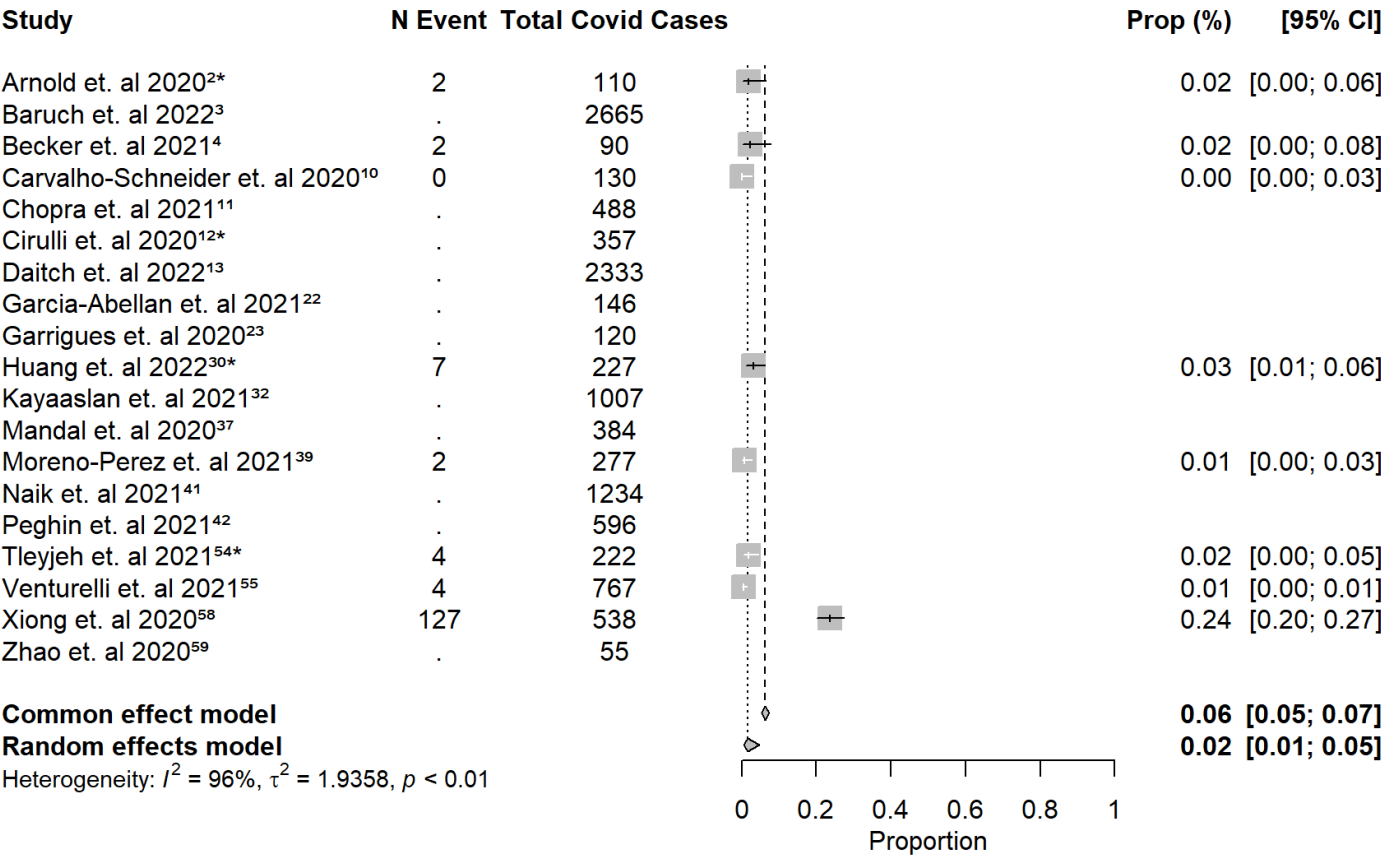

\* indicates value estimated from a figure

Analysis 2

Fever Chills Sweats Or Flushing: Risk of Bias Low

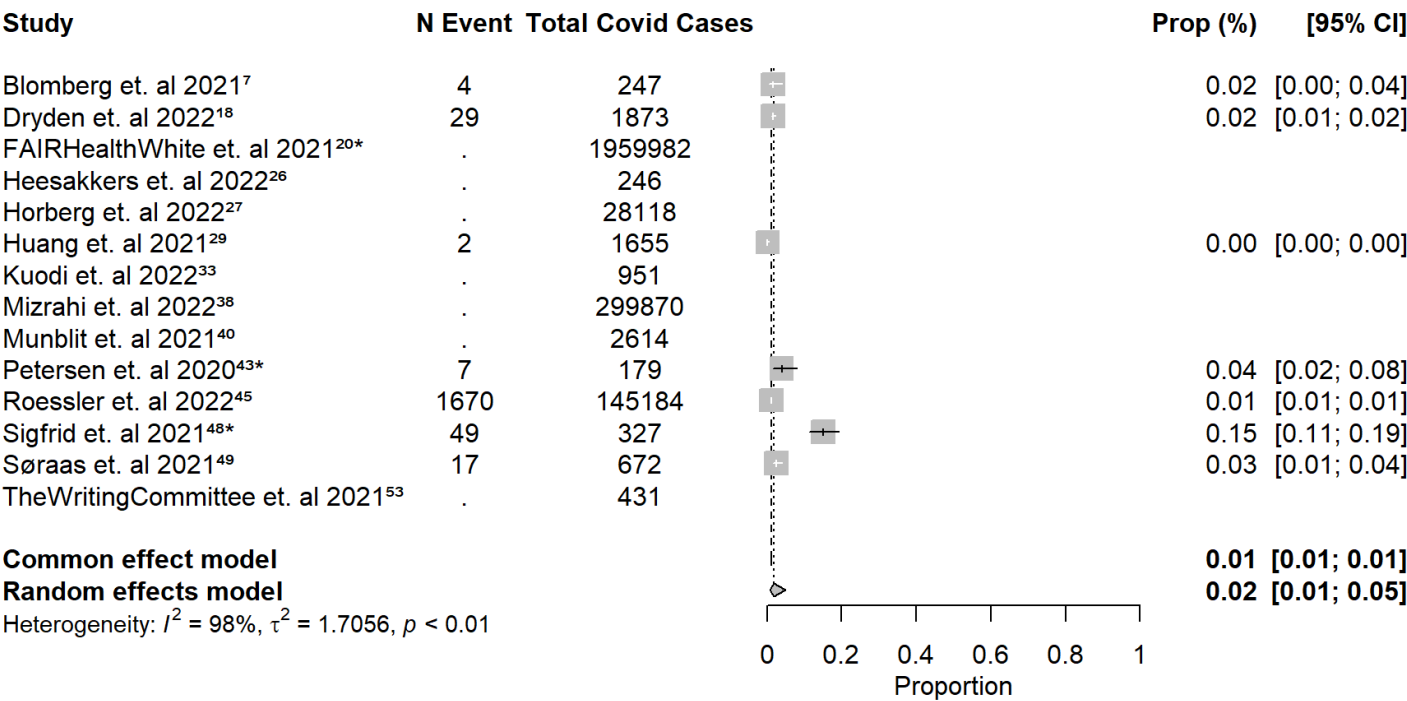

\* indicates value estimated from a figure

Post Exertional Malaise:

Analysis 2  
Post Exertional Malaise: Risk of Bias High

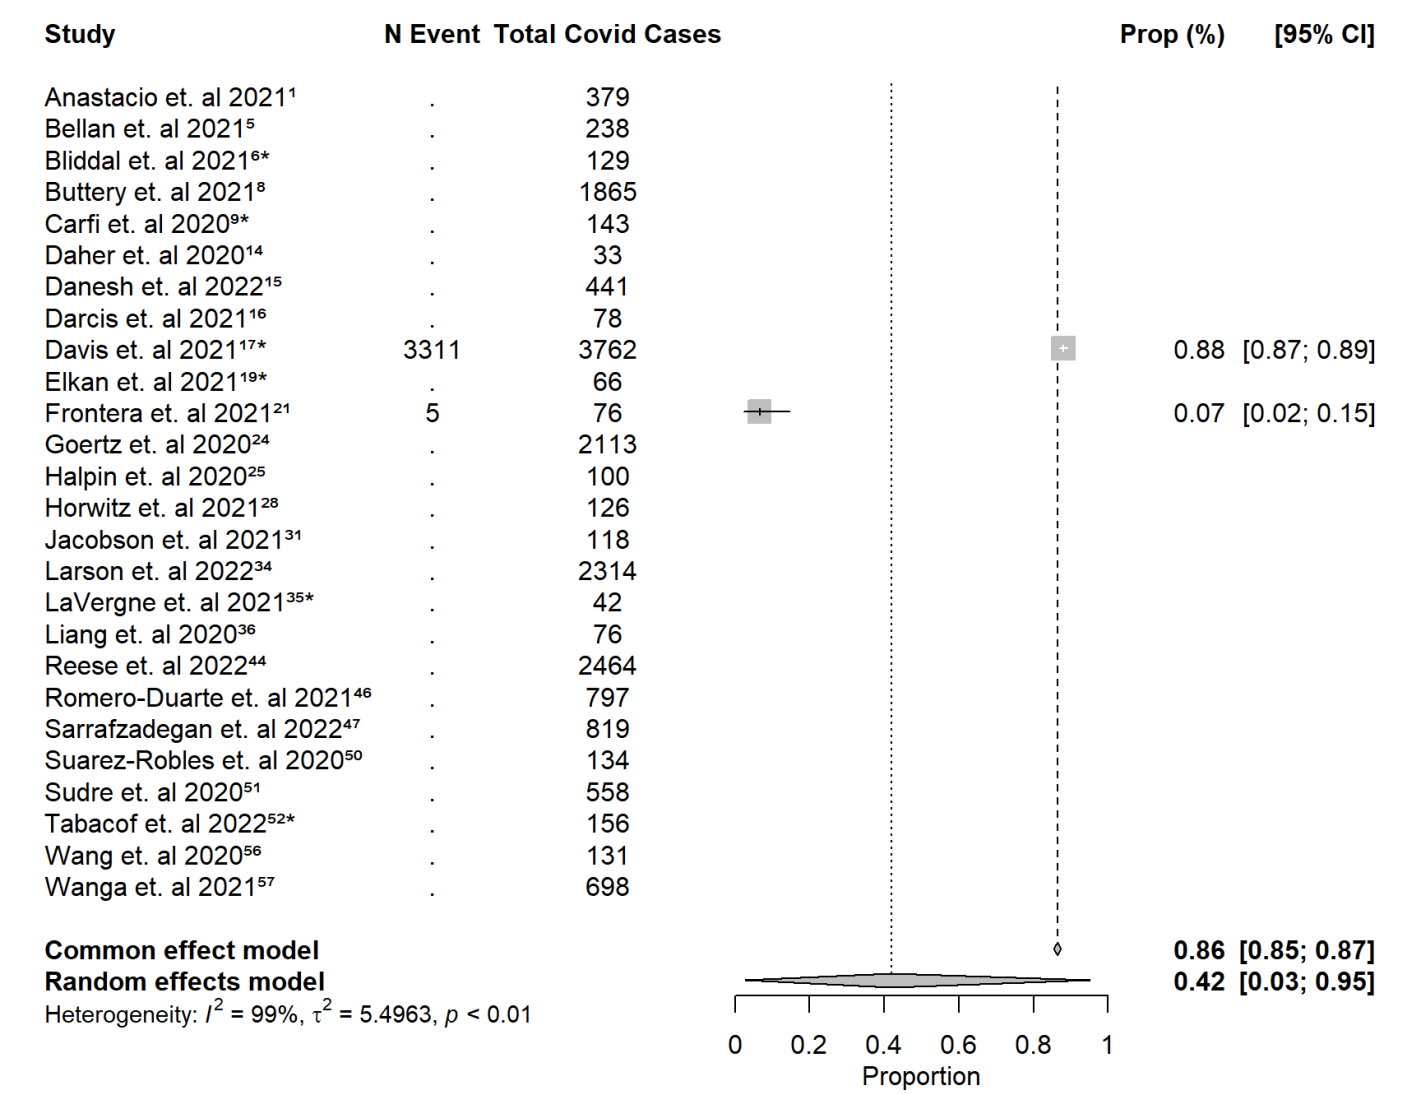



Analysis 2

Post Exertional Malaise: Risk of Bias Moderate

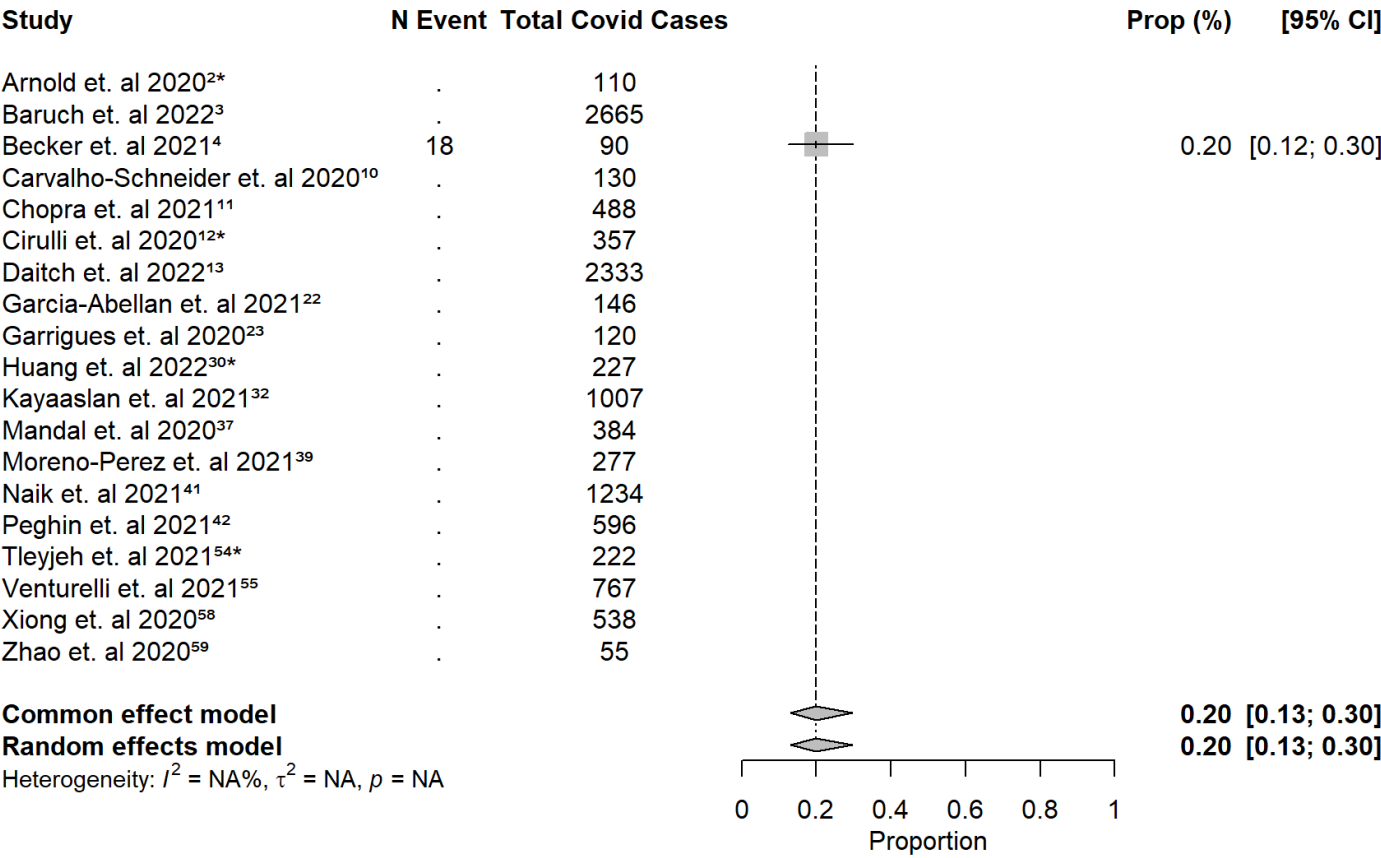

\* indicates value estimated from a figure

# Cardiac Symptoms Including Chest Pain:

## Analysis 2

### Cardiac Symptoms Including Chest Pain: Risk of Bias High

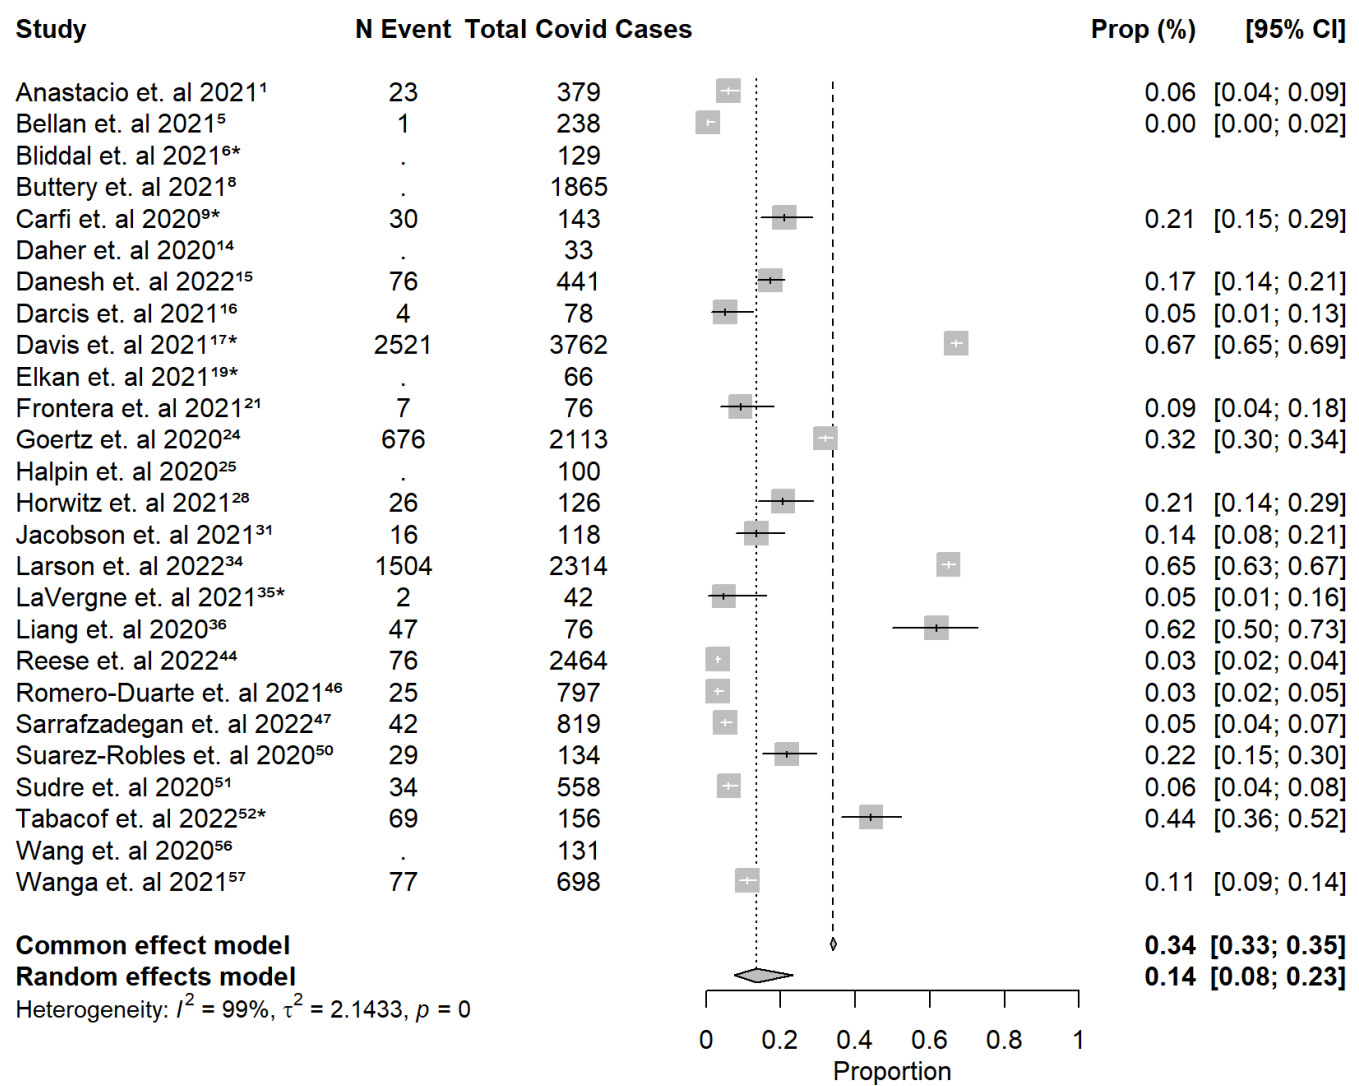

\* indicates value estimated from a figure

Analysis 2

Cardiac Symptoms Including Chest Pain: Risk of Bias Moderate

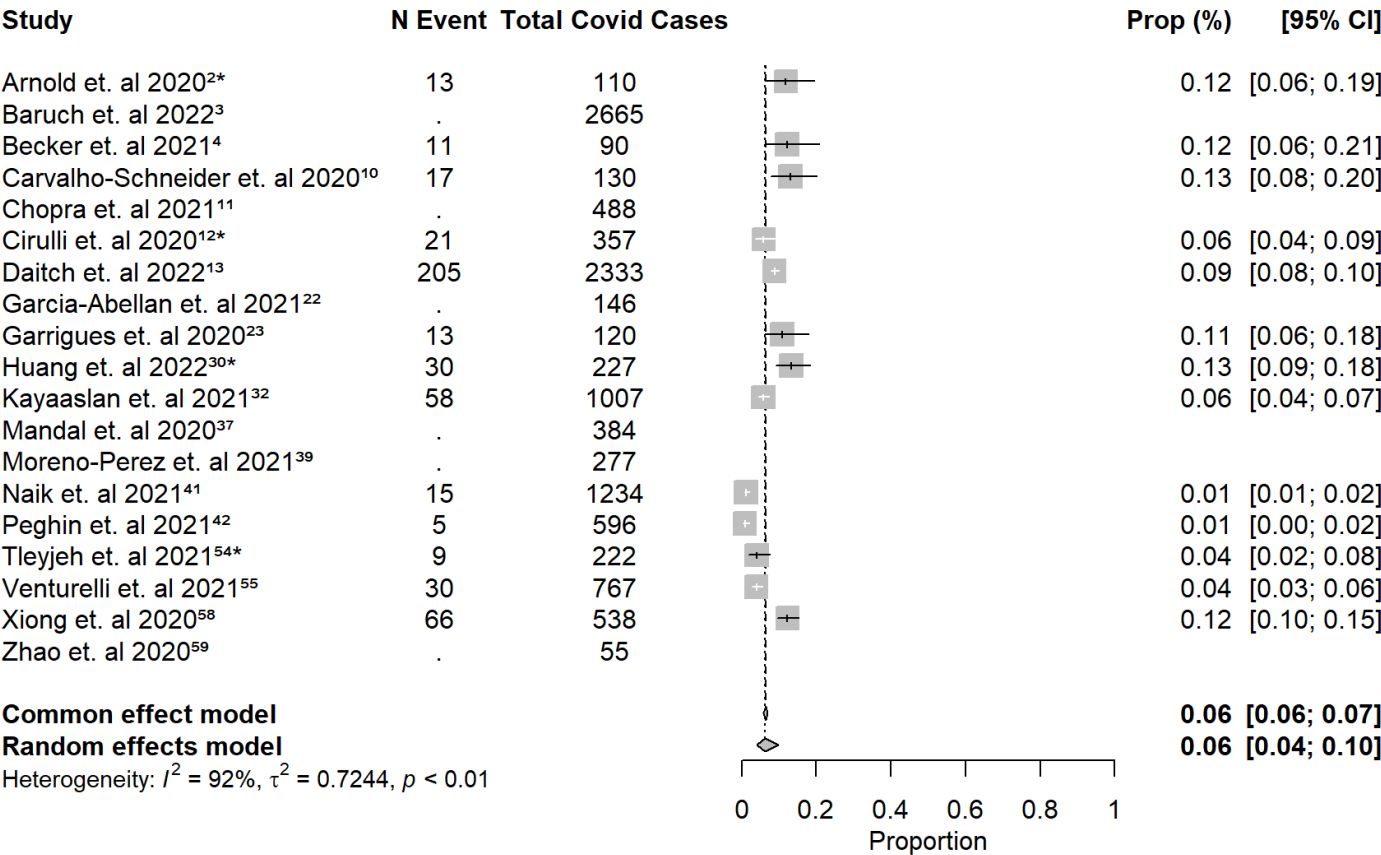

\* indicates value estimated from a figure

Analysis 2

Cardiac Symptoms Including Chest Pain: Risk of Bias Low

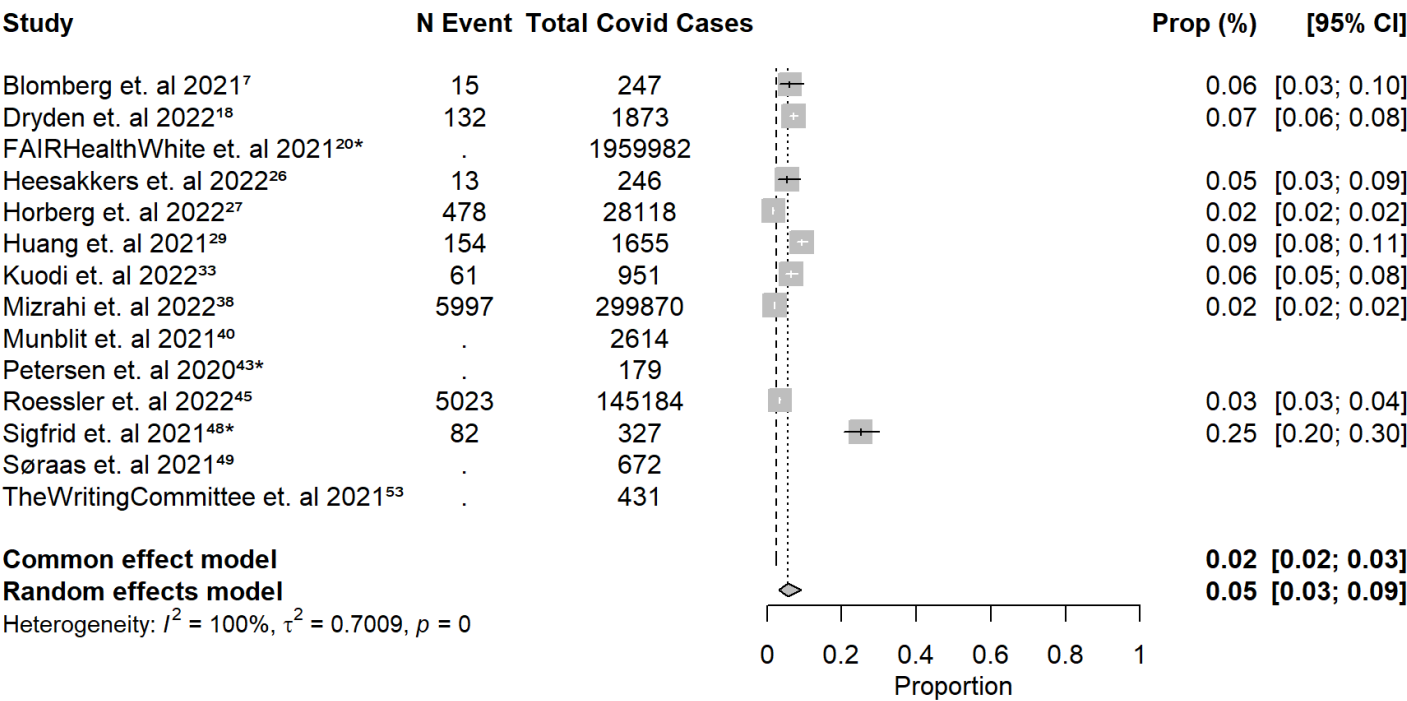

\* indicates value estimated from a figure

Persistant Cough:

Analysis 2  
Persistant Cough: Risk of Bias High

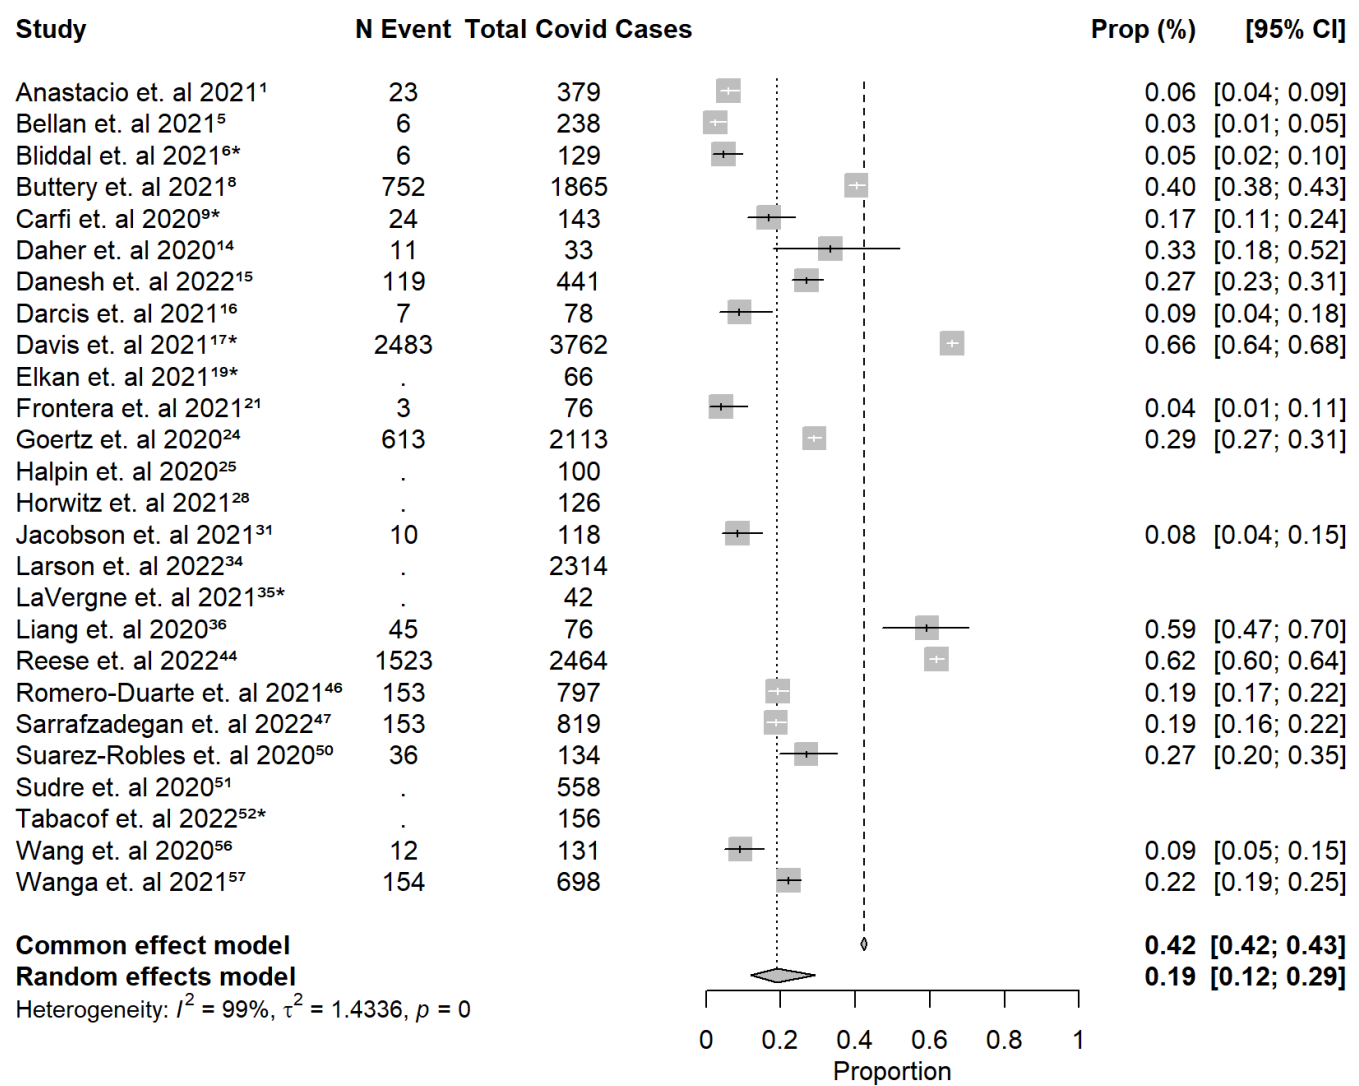

\* indicates value estimated from a figure

Analysis 2  
Persistant Cough: Risk of Bias Moderate

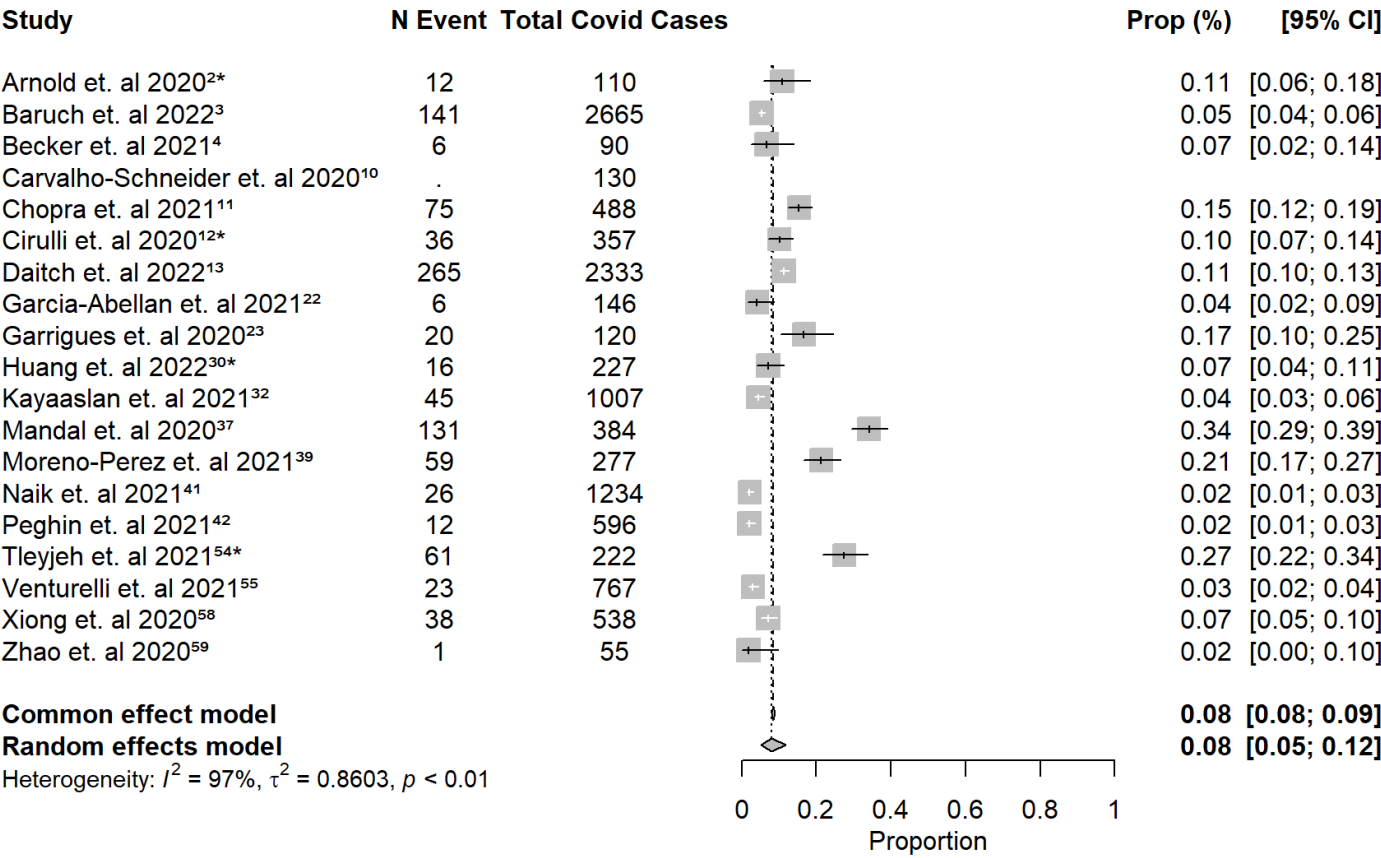

\* indicates value estimated from a figure

Analysis 2  
Persistant Cough: Risk of Bias Low

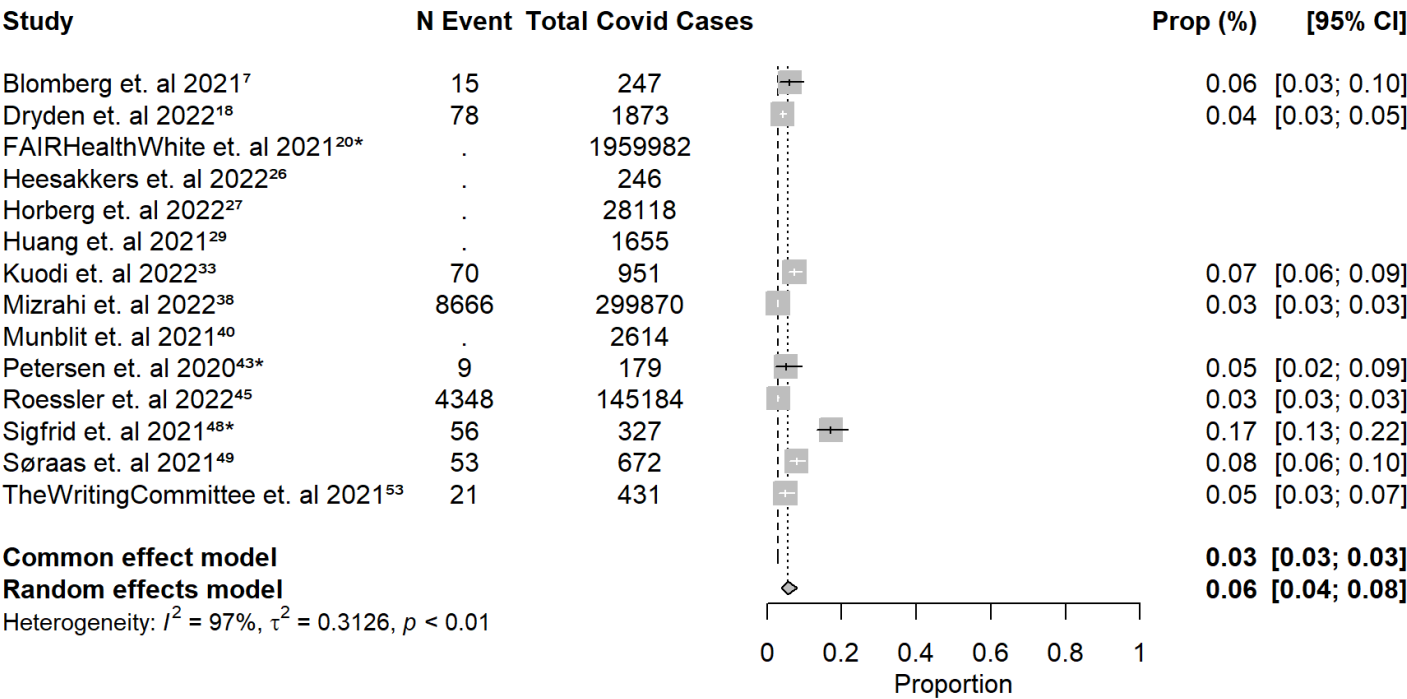

\* indicates value estimated from a figure

# Shortness Of Breath:

## Analysis 2

### Shortness Of Breath: Risk of Bias High

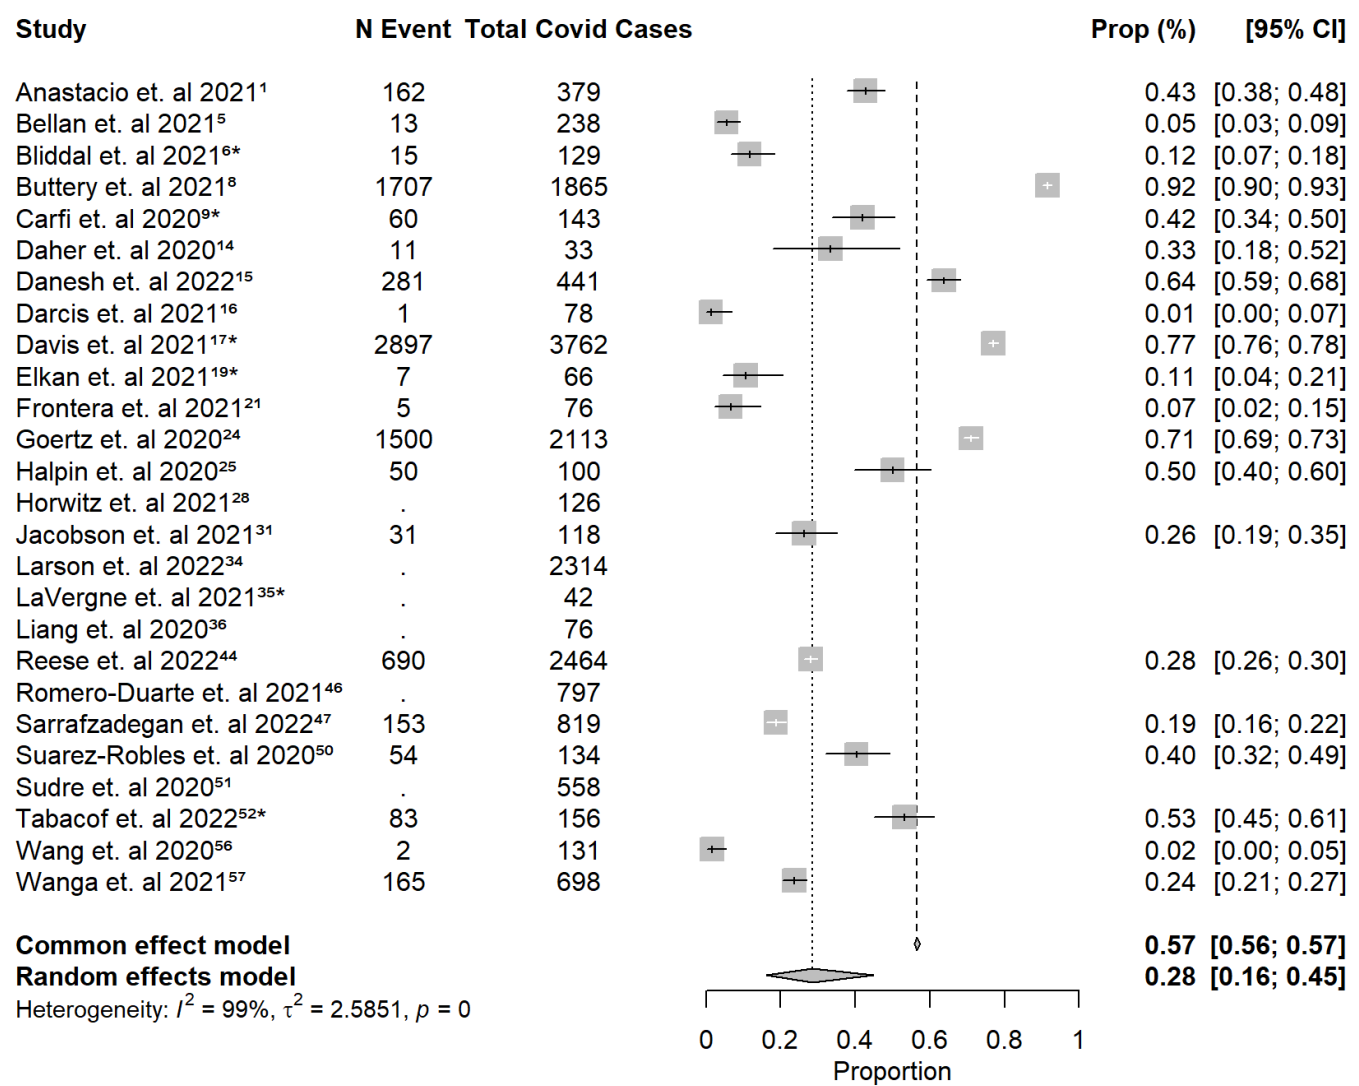

\* indicates value estimated from a figure



Analysis 2

Shortness Of Breath: Risk of Bias Moderate

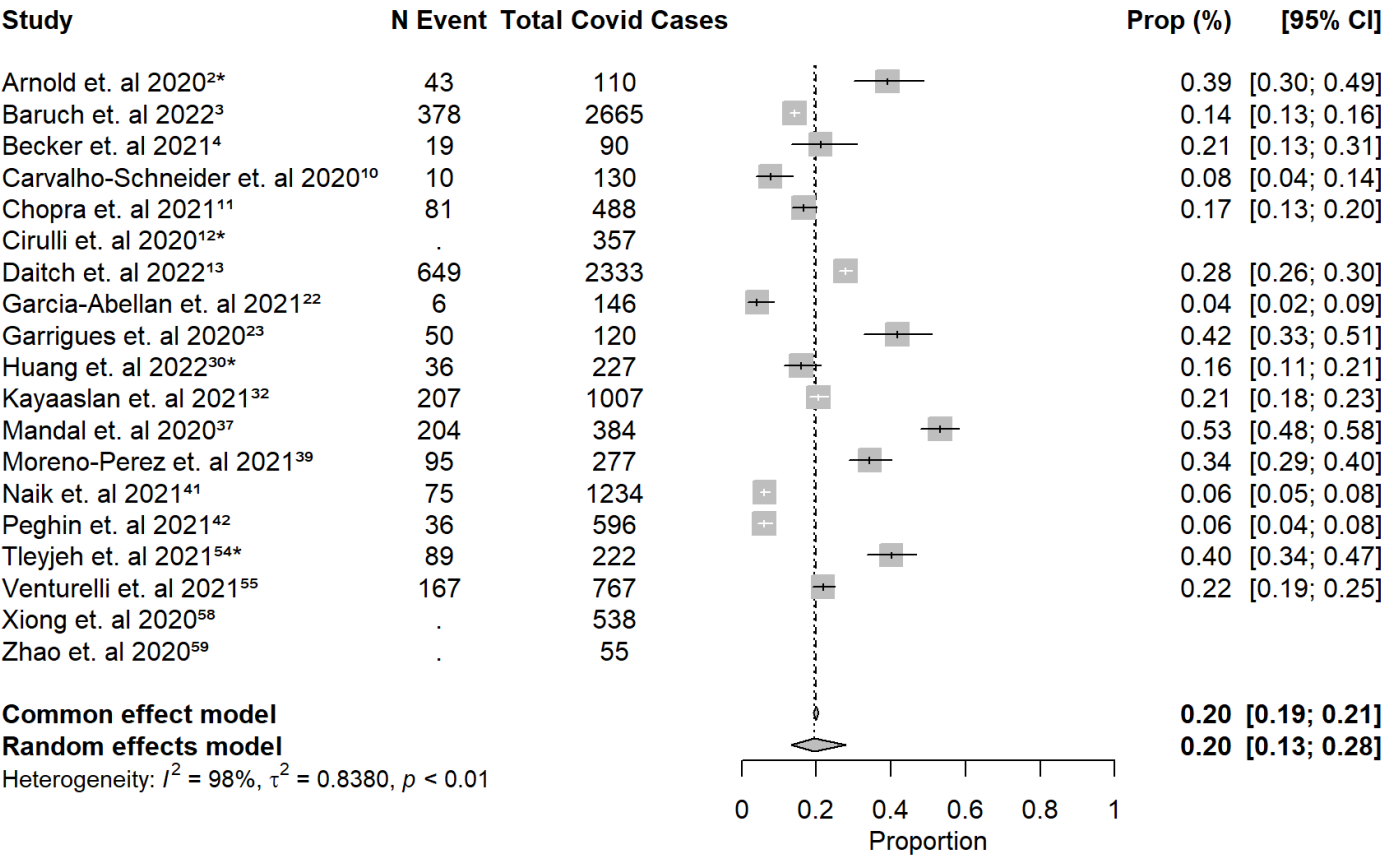

\* indicates value estimated from a figure

Analysis 2

Shortness Of Breath: Risk of Bias Low

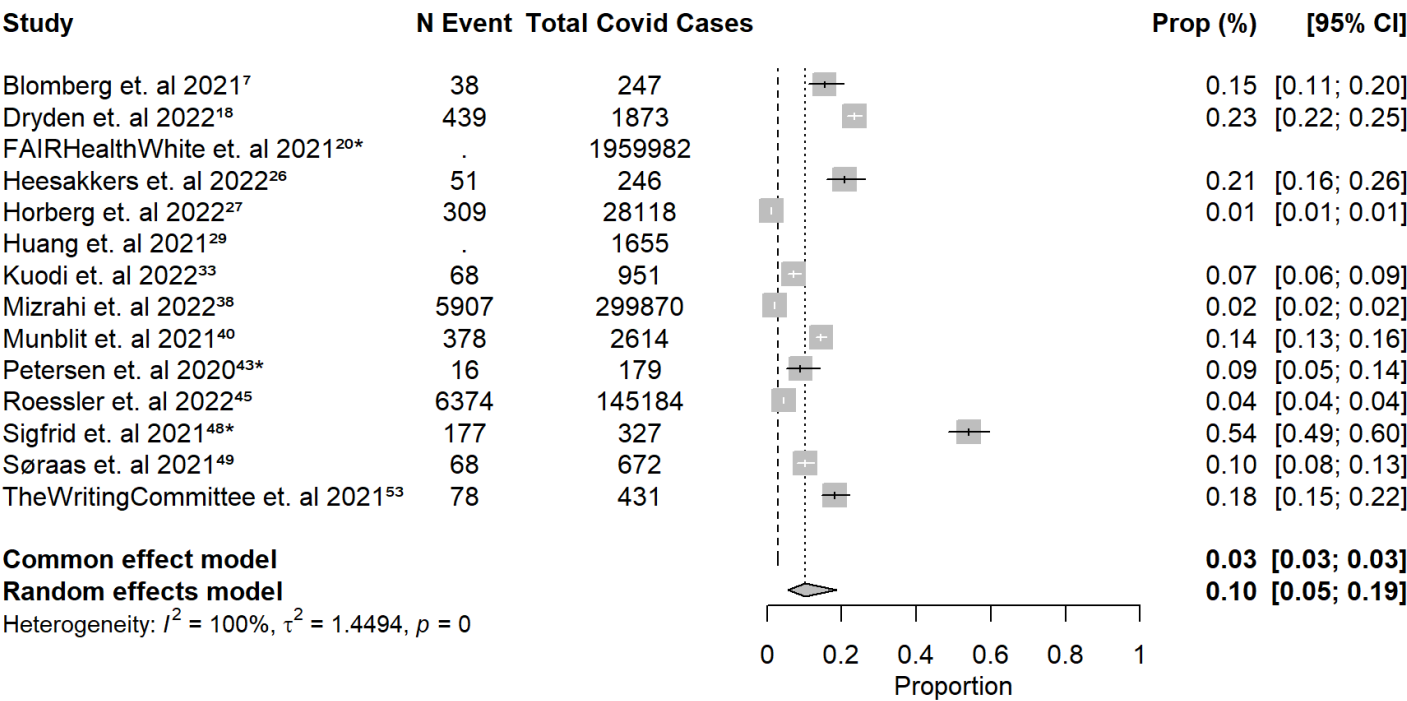

\* indicates value estimated from a figure

# Sleep Problems:

## Analysis 2

### Sleep Problems: Risk of Bias High

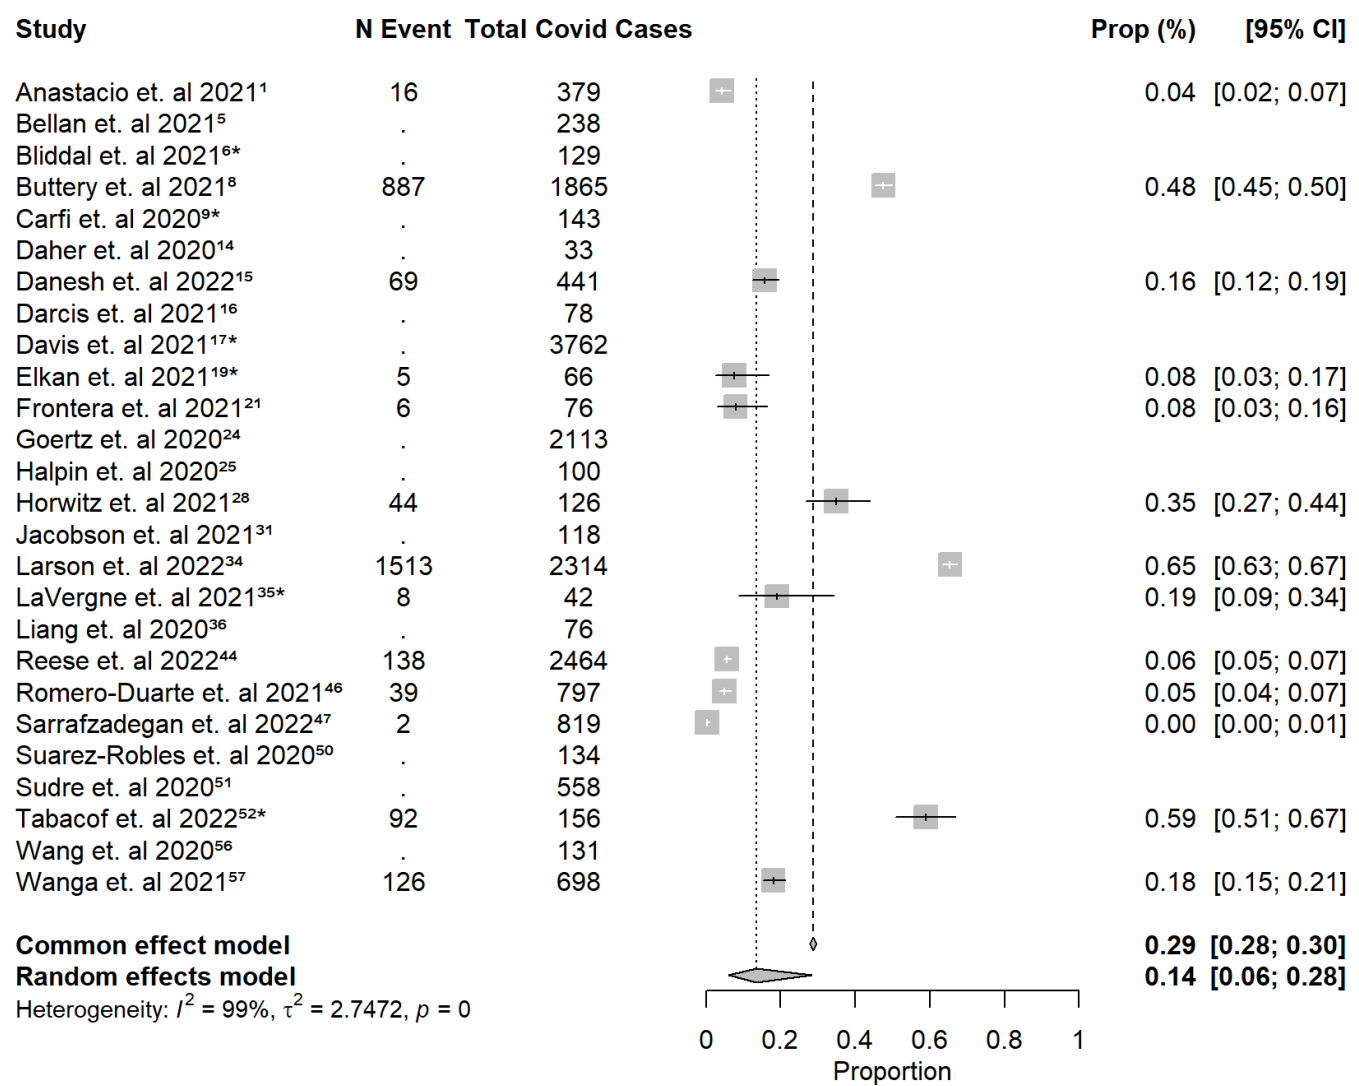

\* indicates value estimated from a figure

Analysis 2

Sleep Problems: Risk of Bias Moderate

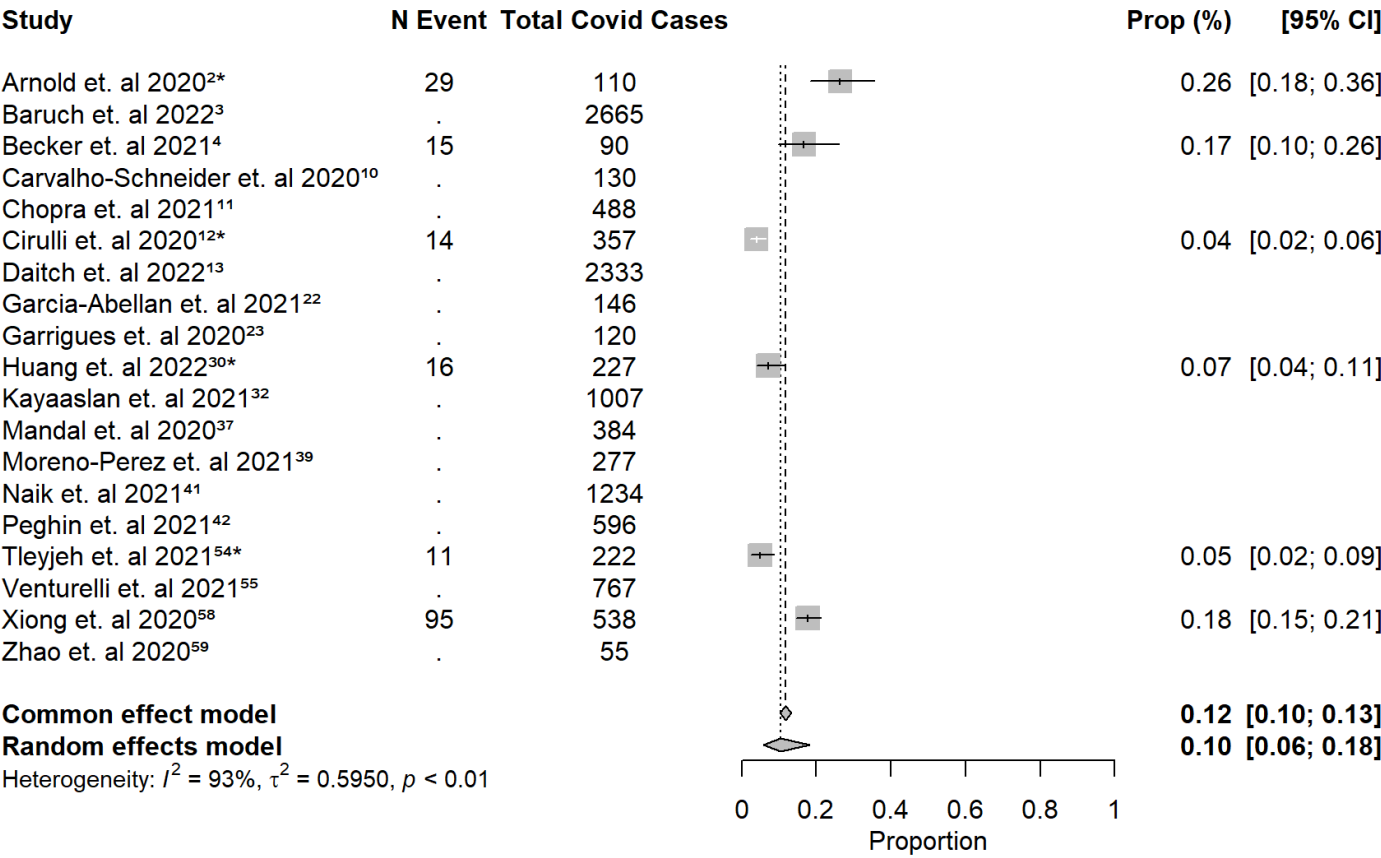

\* indicates value estimated from a figure

Analysis 2

Sleep Problems: Risk of Bias Low

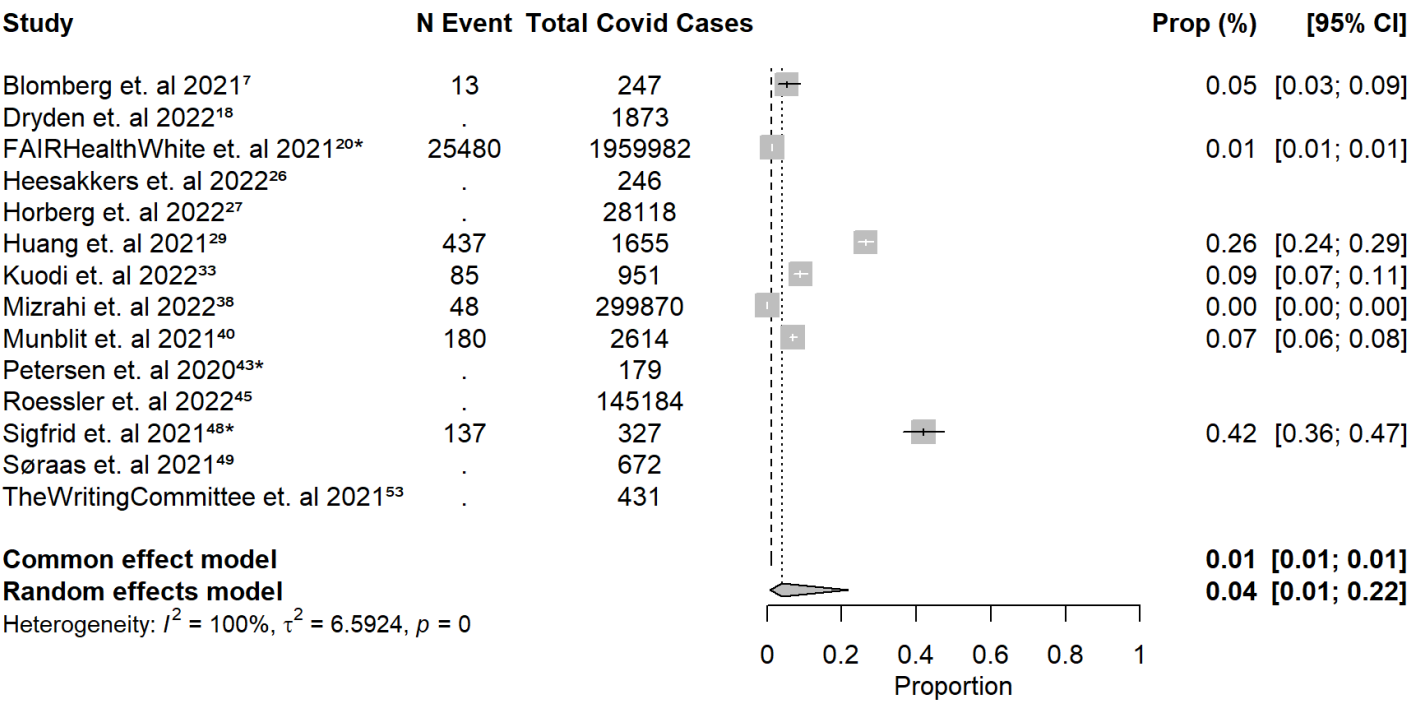

\* indicates value estimated from a figure

# Problems Thinking Or Concentrating:

## Analysis 2

### Problems Thinking Or Concentrating: Risk of Bias High

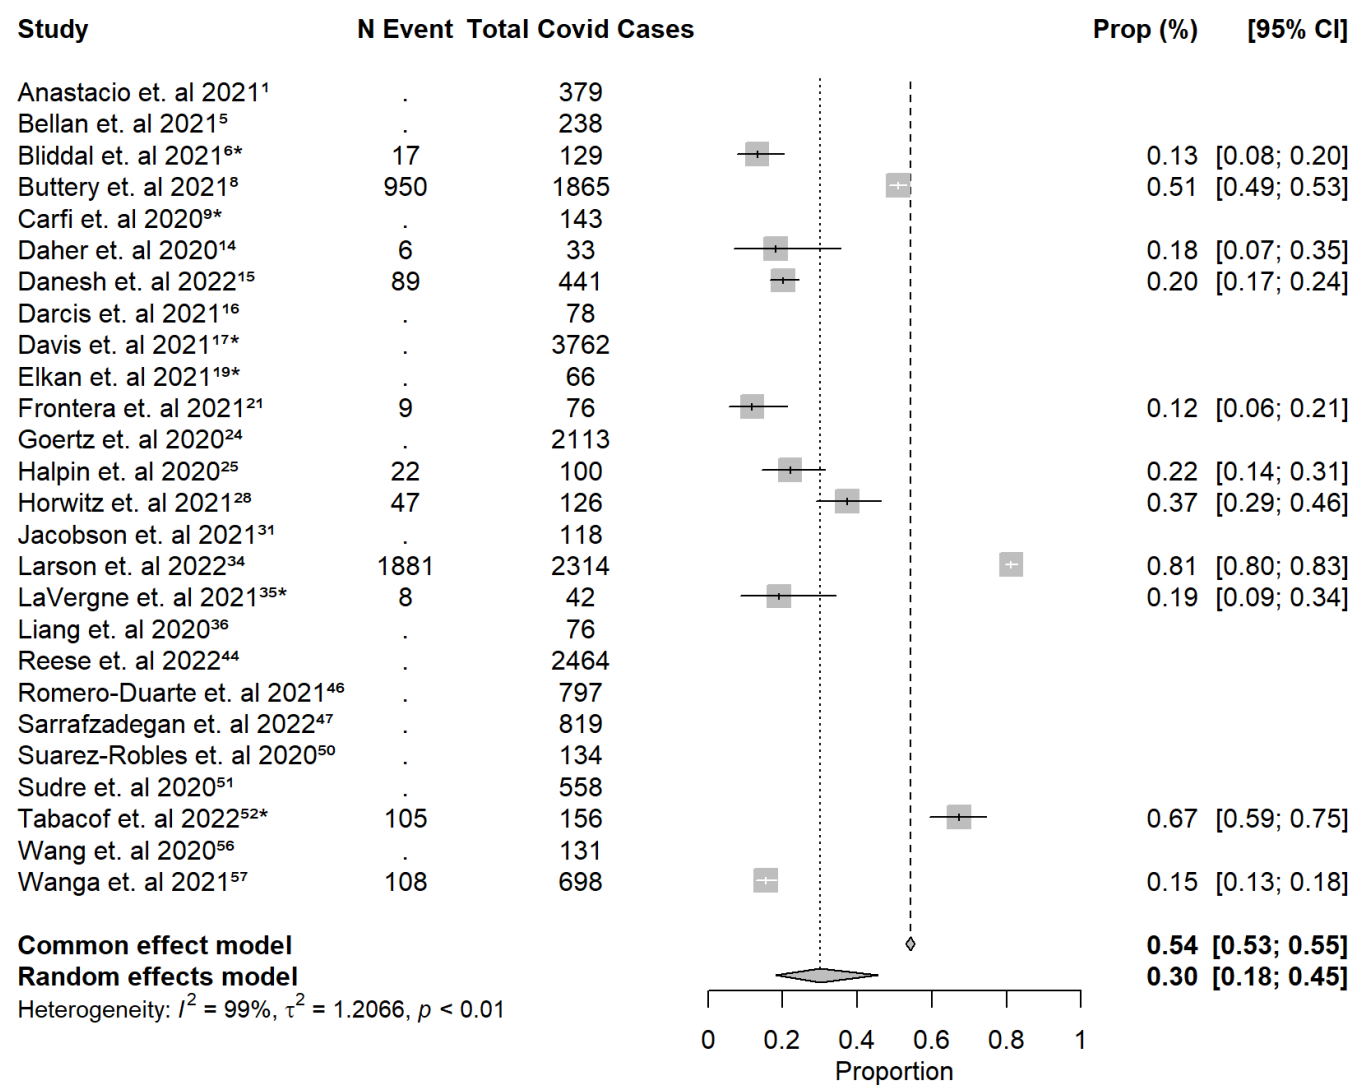

\* indicates value estimated from a figure

Analysis 2

Problems Thinking Or Concentrating: Risk of Bias Moderate

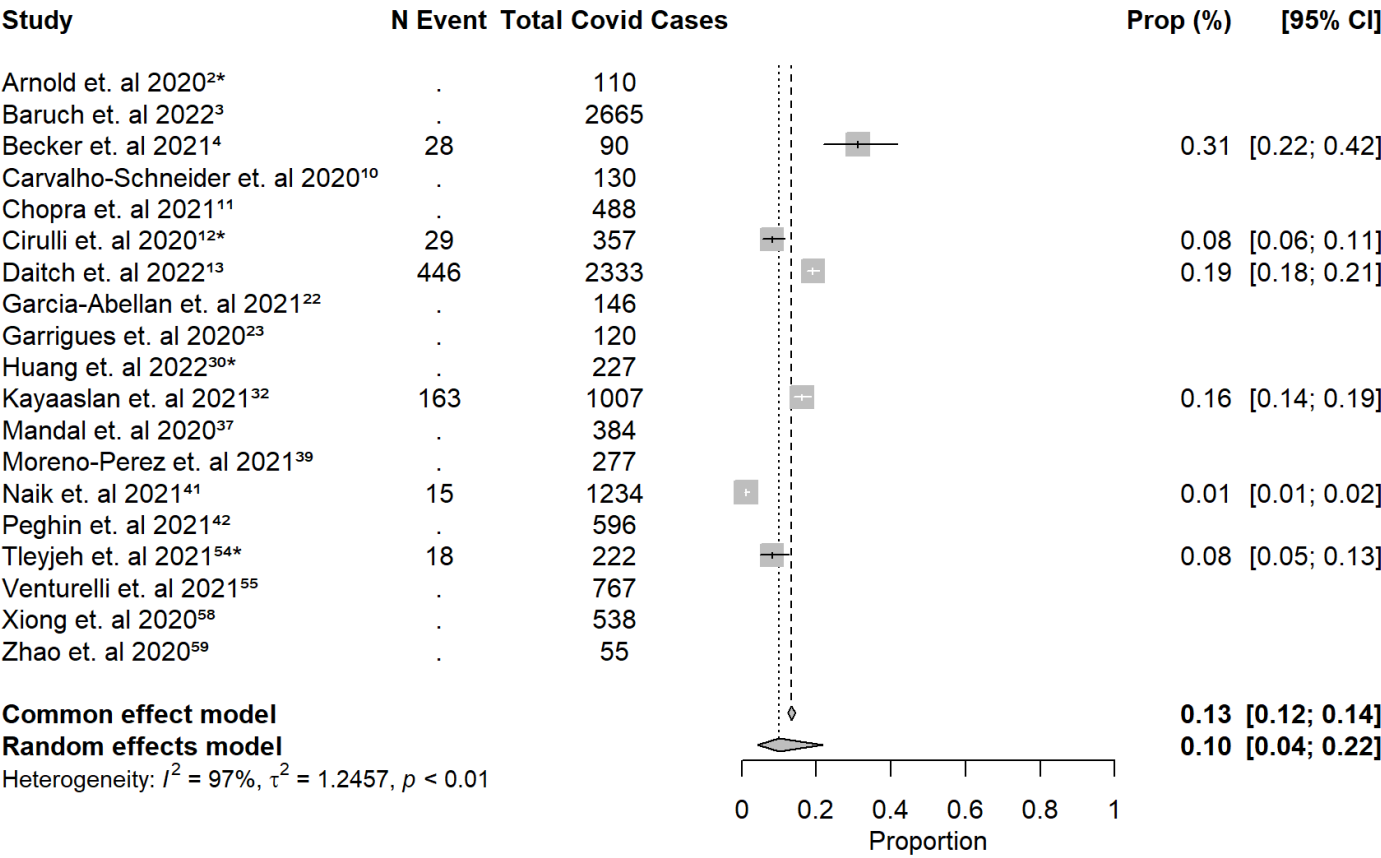

\* indicates value estimated from a figure

## Analysis 2

### Problems Thinking Or Concentrating: Risk of Bias Low

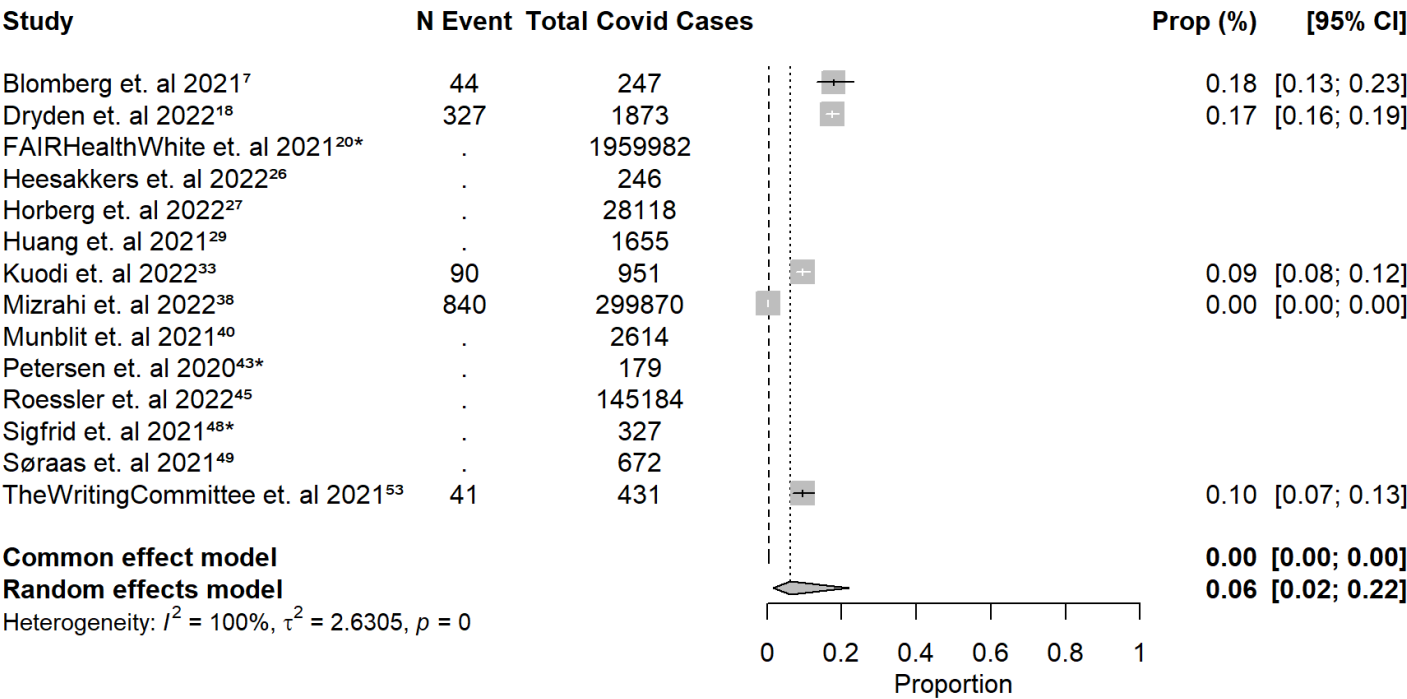

\* indicates value estimated from a figure



Dizziness:

Analysis 2  
Dizziness: Risk of Bias High

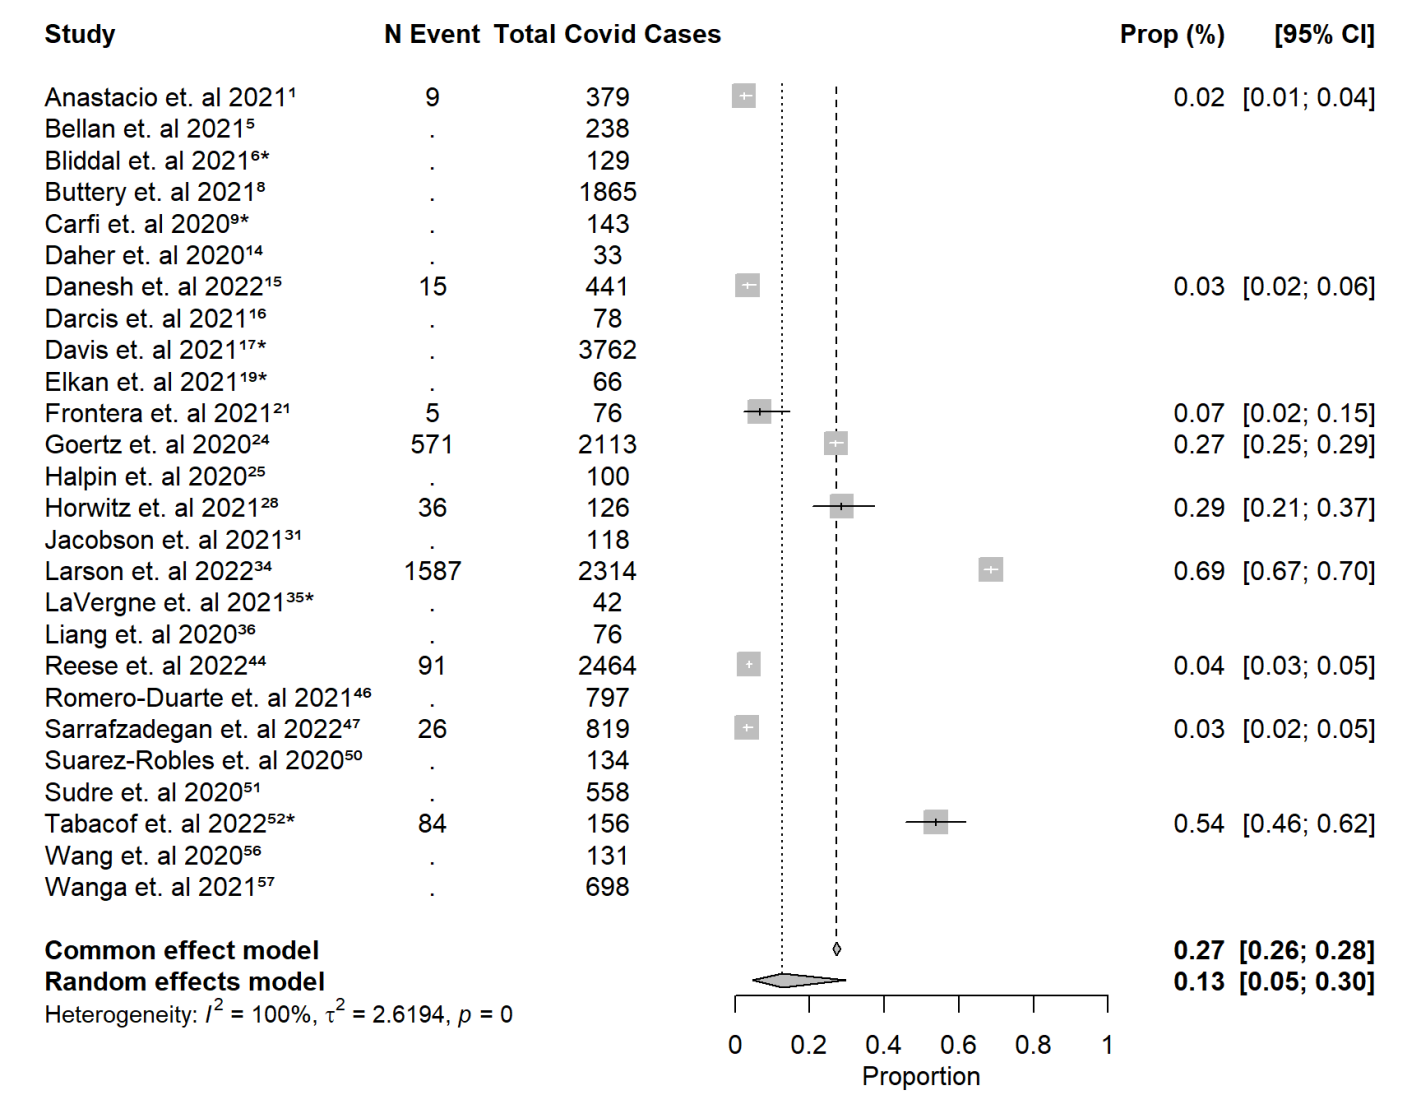

\* indicates value estimated from a figure

Analysis 2  
Dizziness: Risk of Bias Moderate

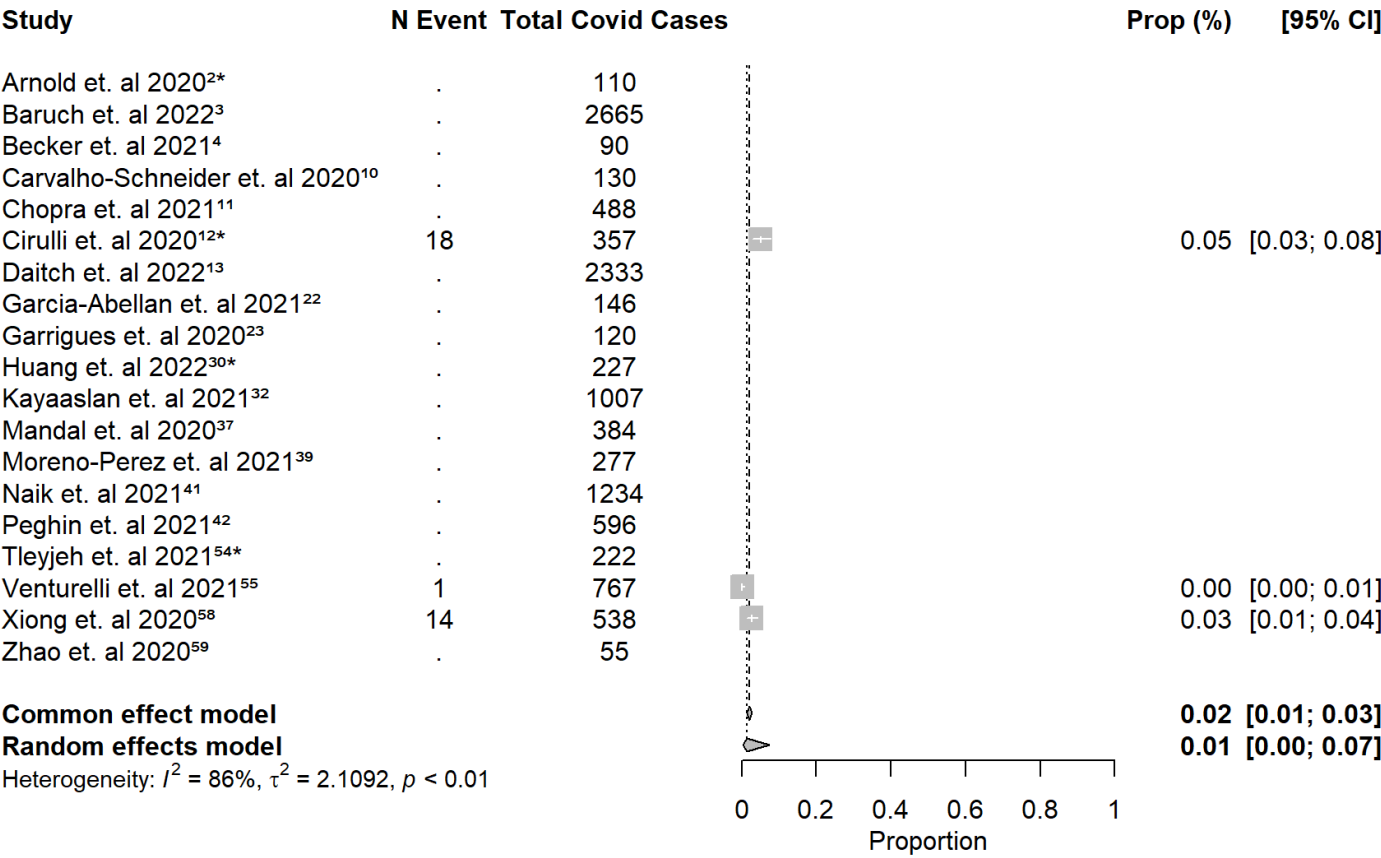

\* indicates value estimated from a figure

Analysis 2  
Dizziness: Risk of Bias Low

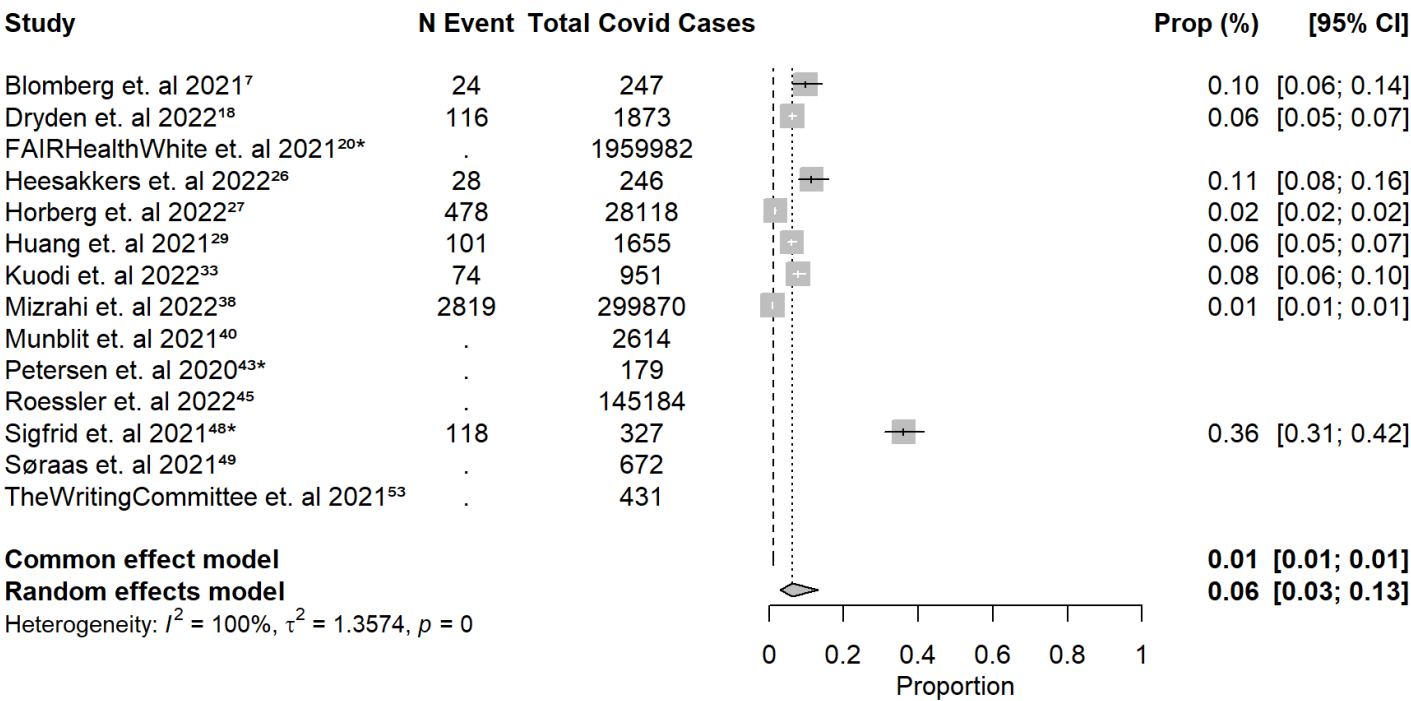

\* indicates value estimated from a figure

Headache:

Analysis 2  
Headache: Risk of Bias High

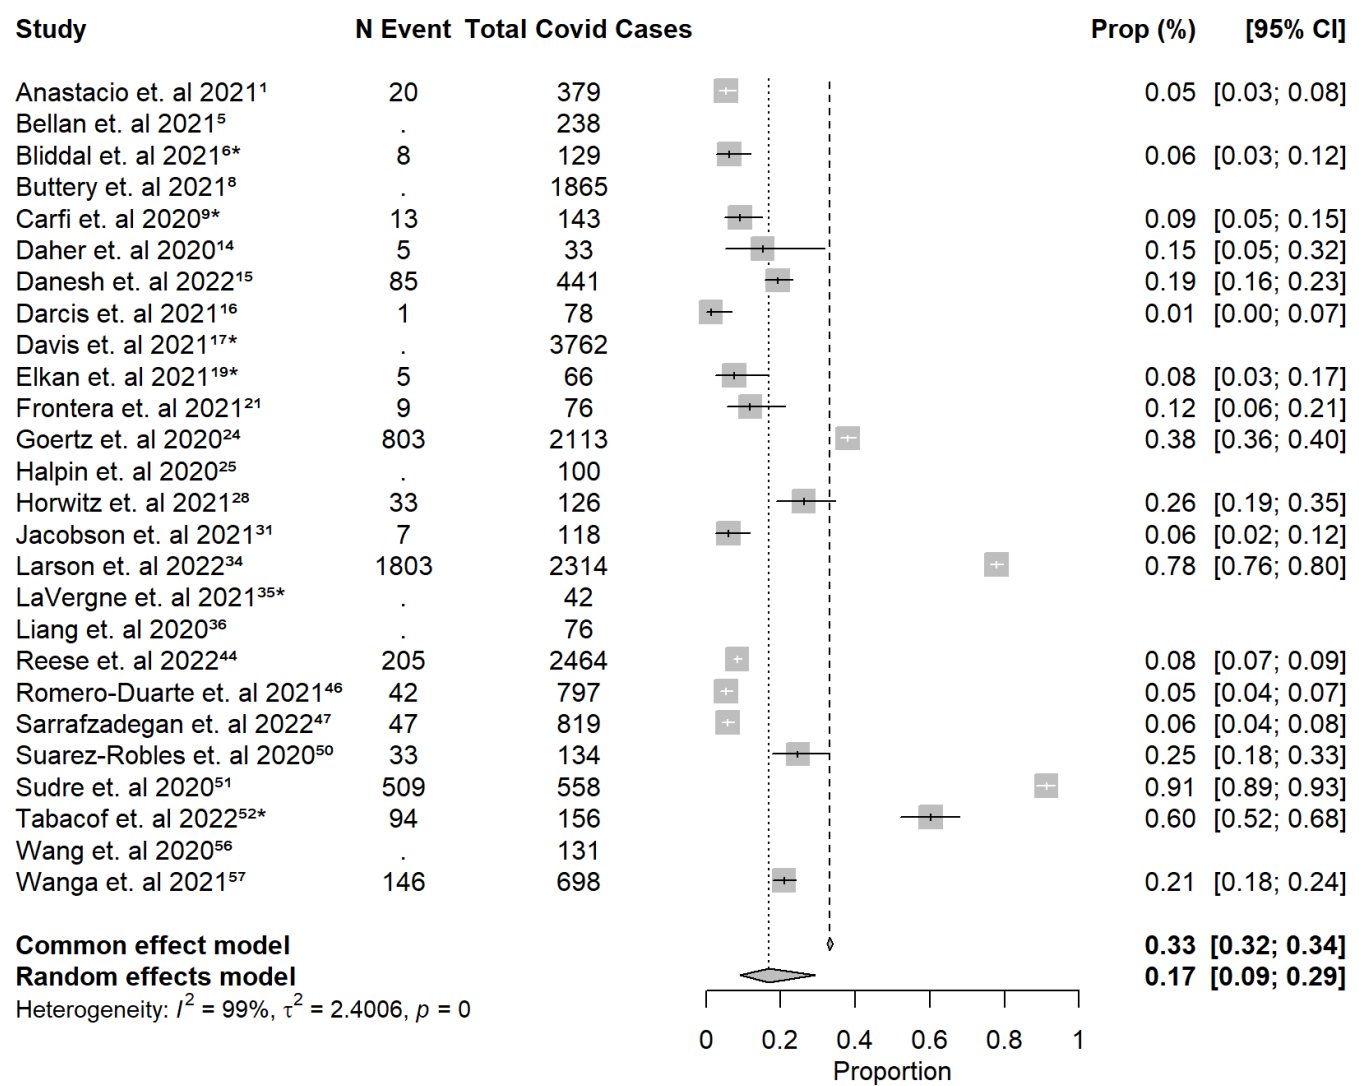

\* indicates value estimated from a figure

Analysis 2  
Headache: Risk of Bias Moderate

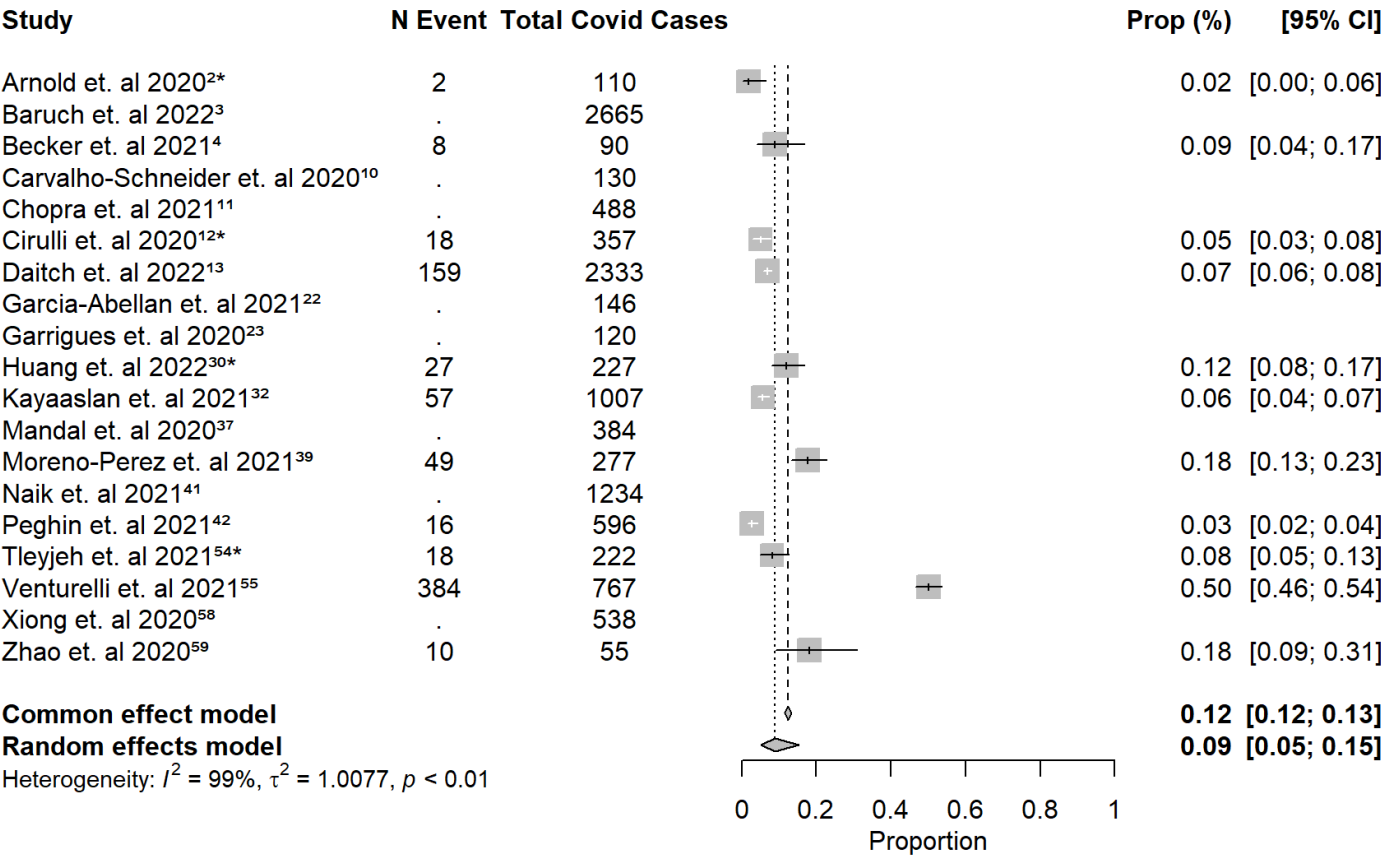

\* indicates value estimated from a figure

Analysis 2  
Headache: Risk of Bias Low

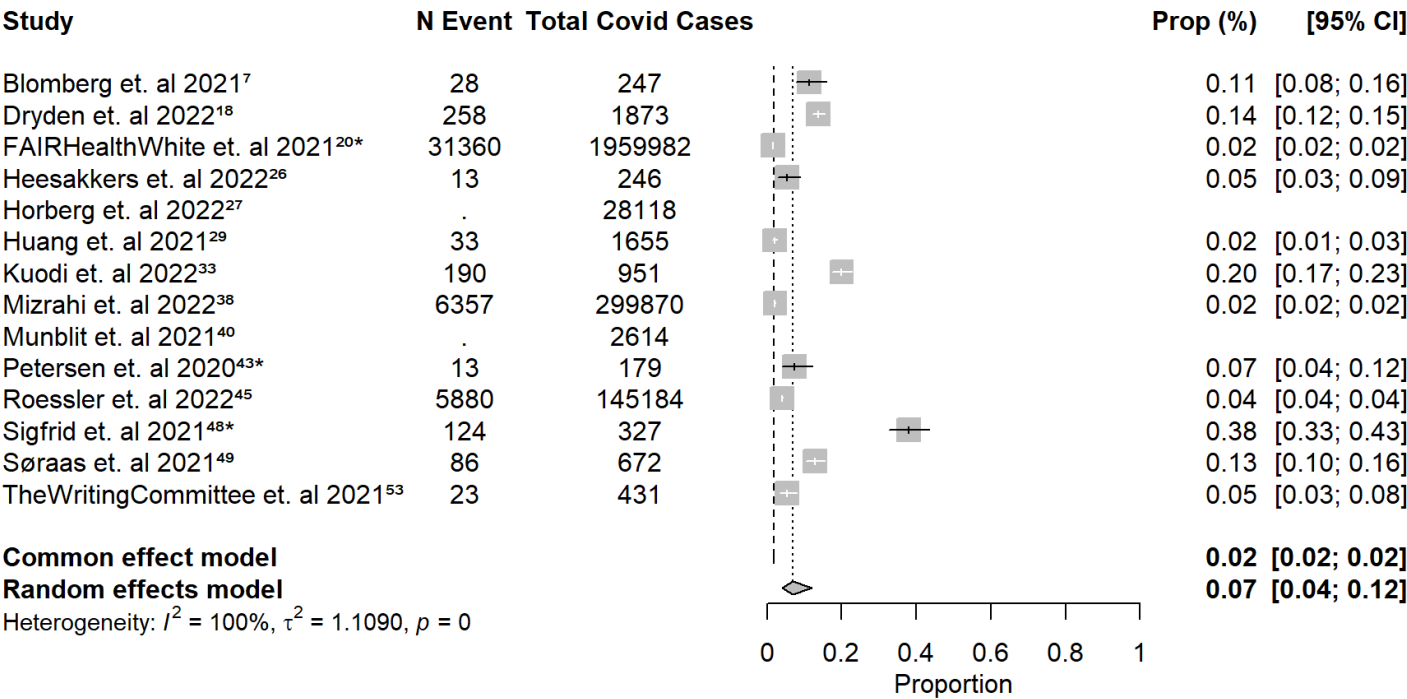

\* indicates value estimated from a figure

# Nerve Problems Seizures:

## Analysis 2

### Nerve Problems Seizures: Risk of Bias High

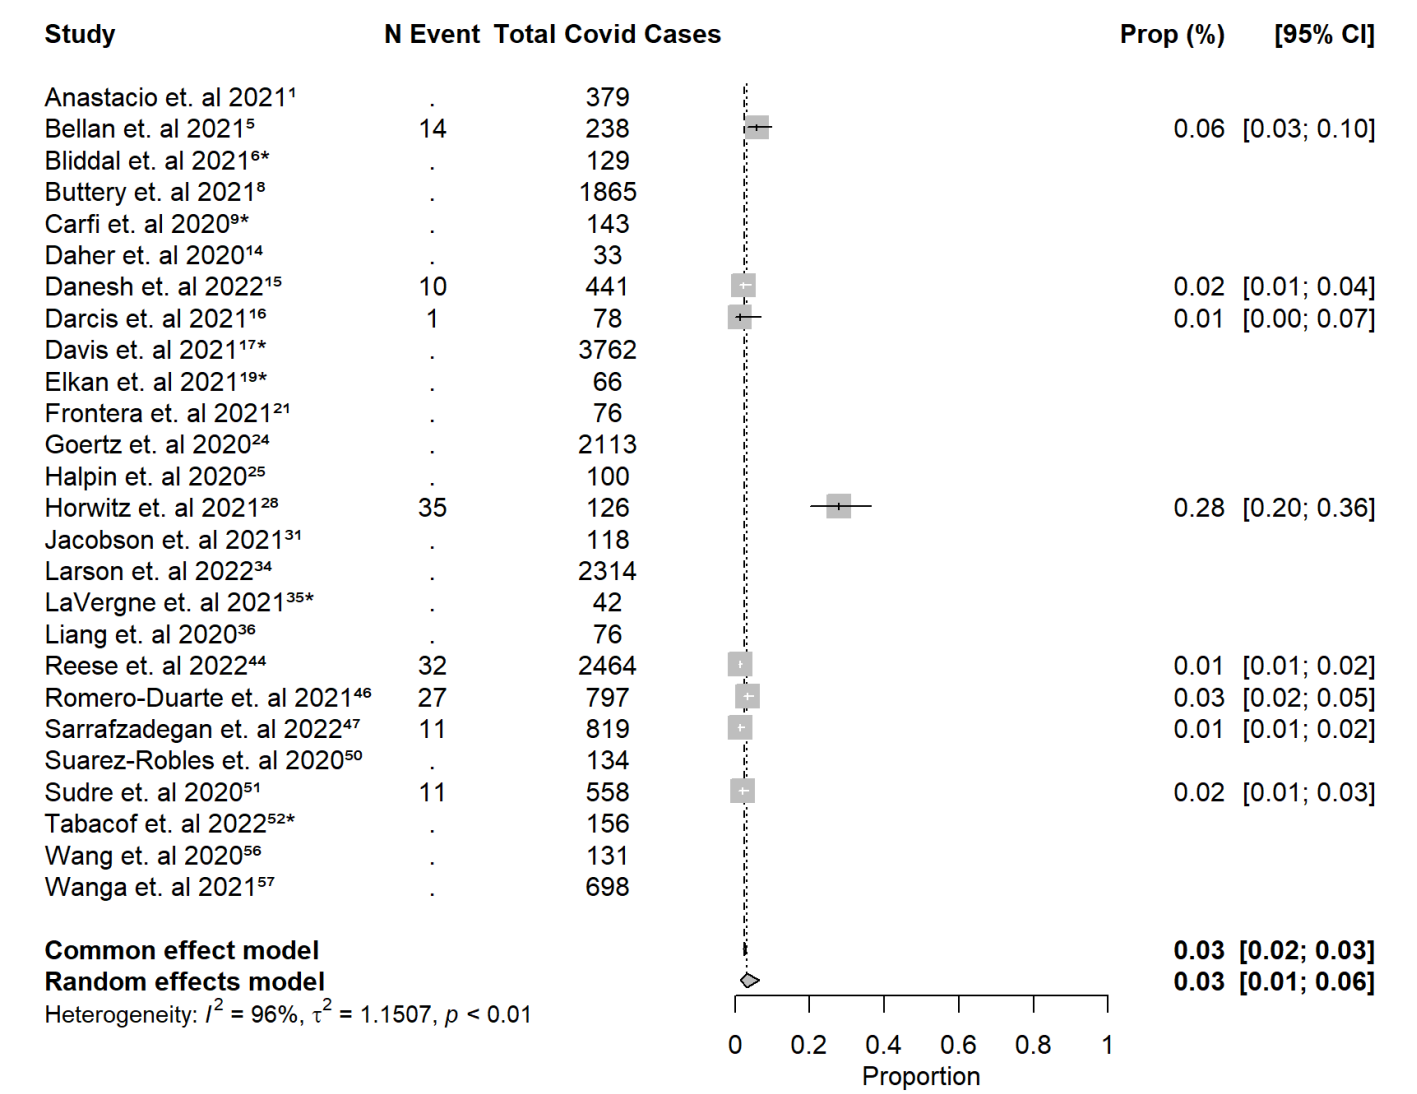

Analysis 2

Nerve Problems Seizures: Risk of Bias Moderate

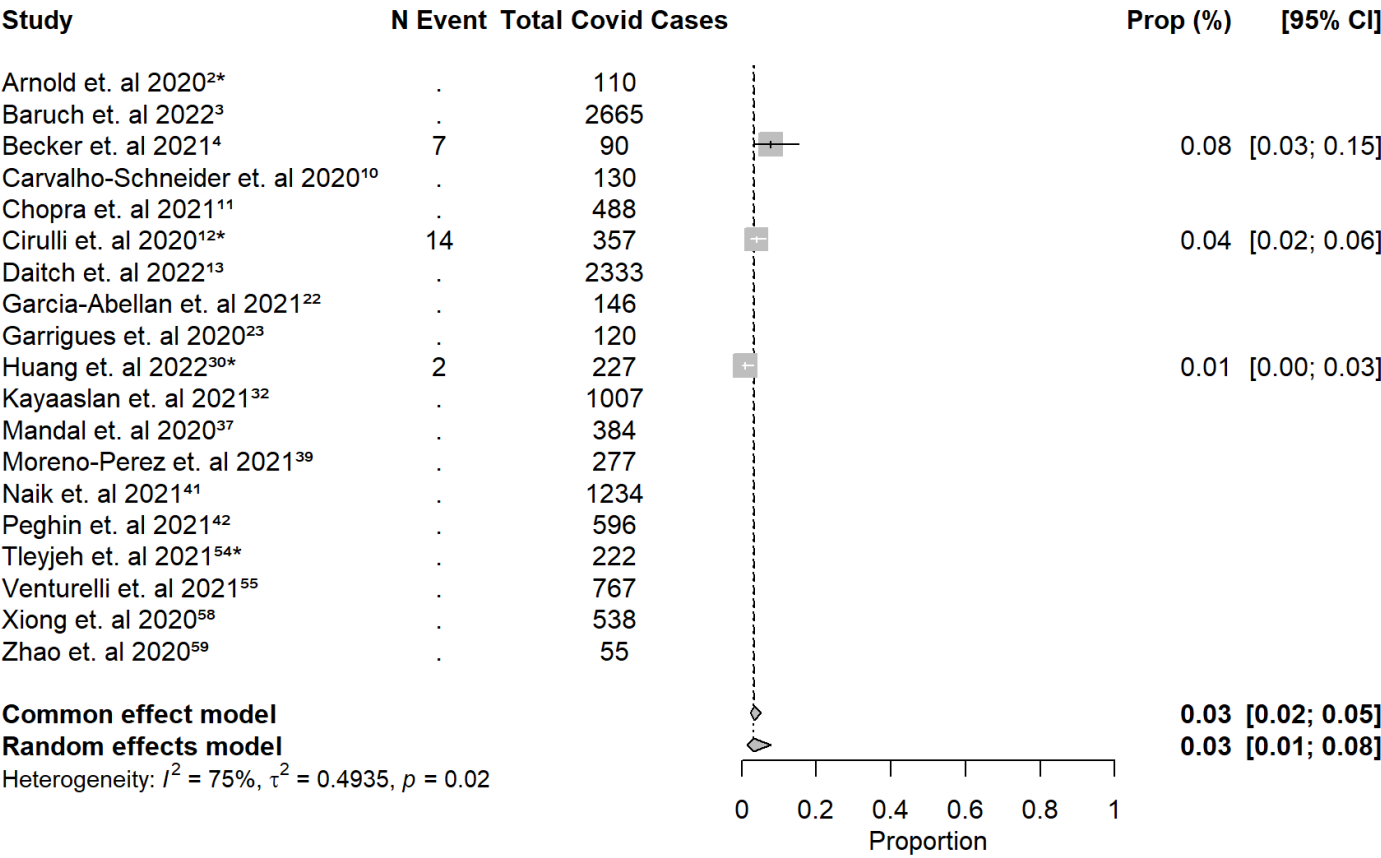

\* indicates value estimated from a figure



Analysis 2

Nerve Problems Seizures: Risk of Bias Low

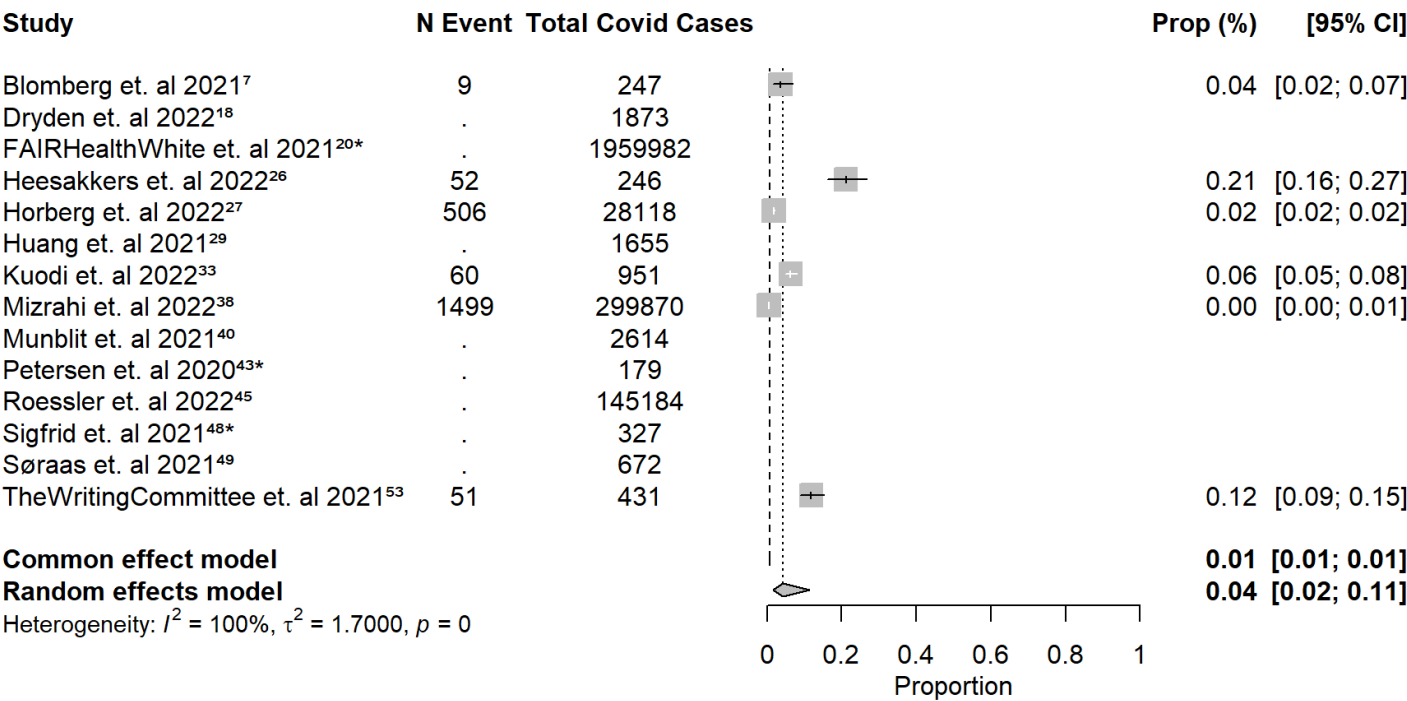

\* indicates value estimated from a figure

# Loss Of Or Change In Smell Or Taste:

## Analysis 2

### Loss Of Or Change In Smell Or Taste: Risk of Bias High

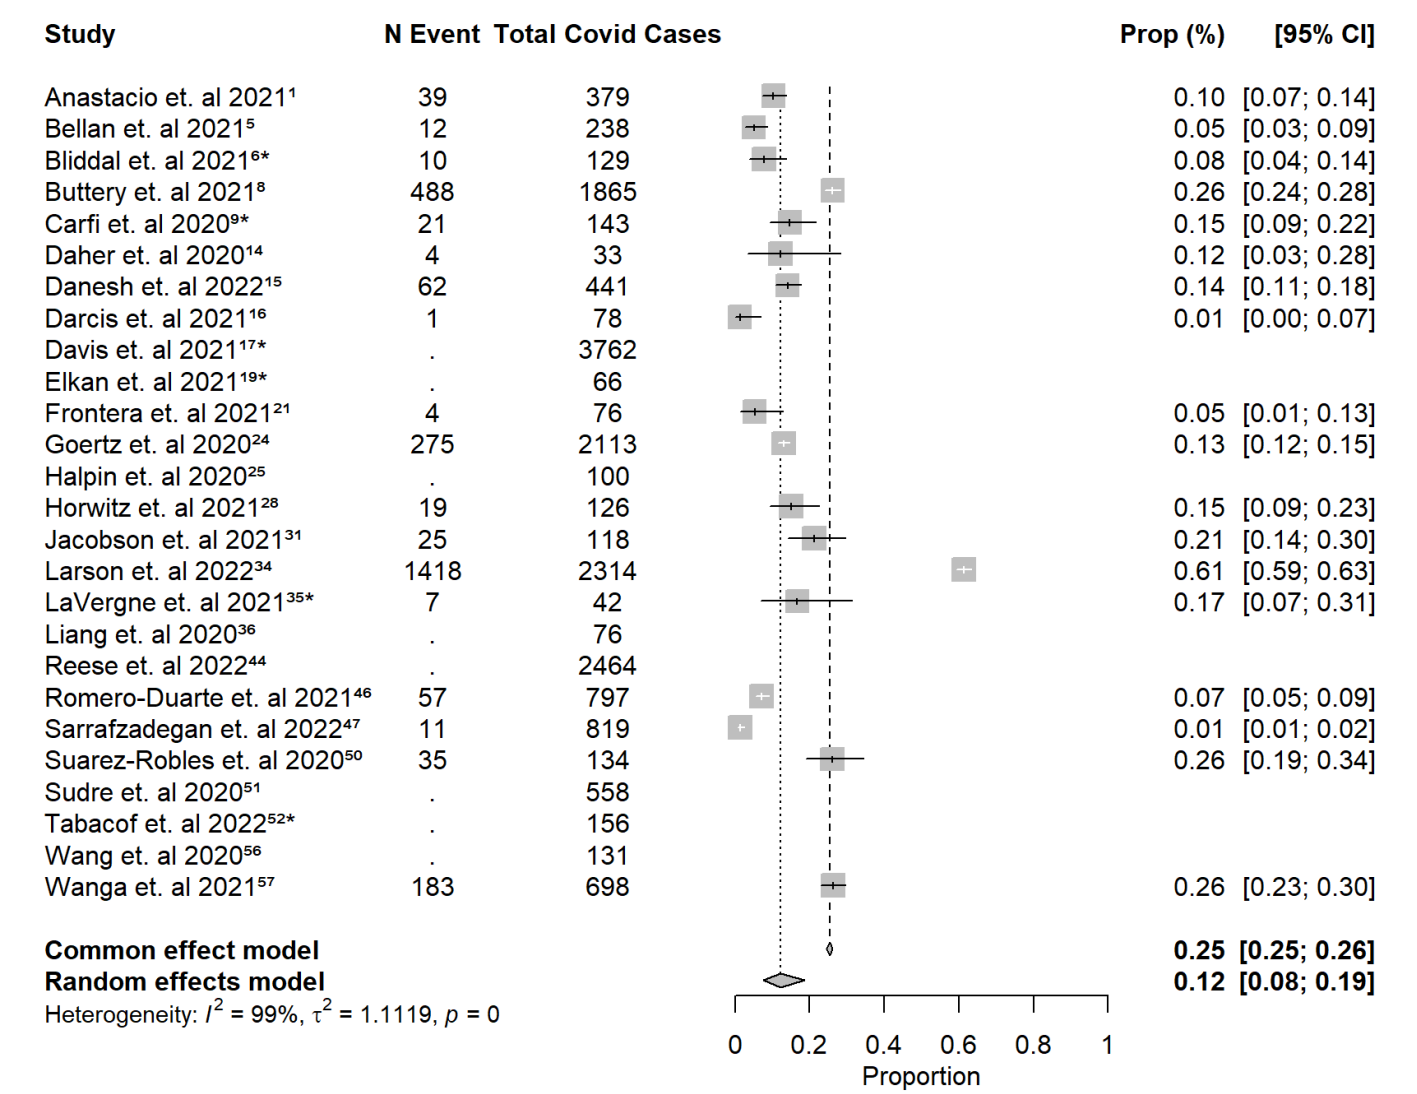

\* indicates value estimated from a figure

Analysis 2

Loss Of Or Change In Smell Or Taste: Risk of Bias Moderate

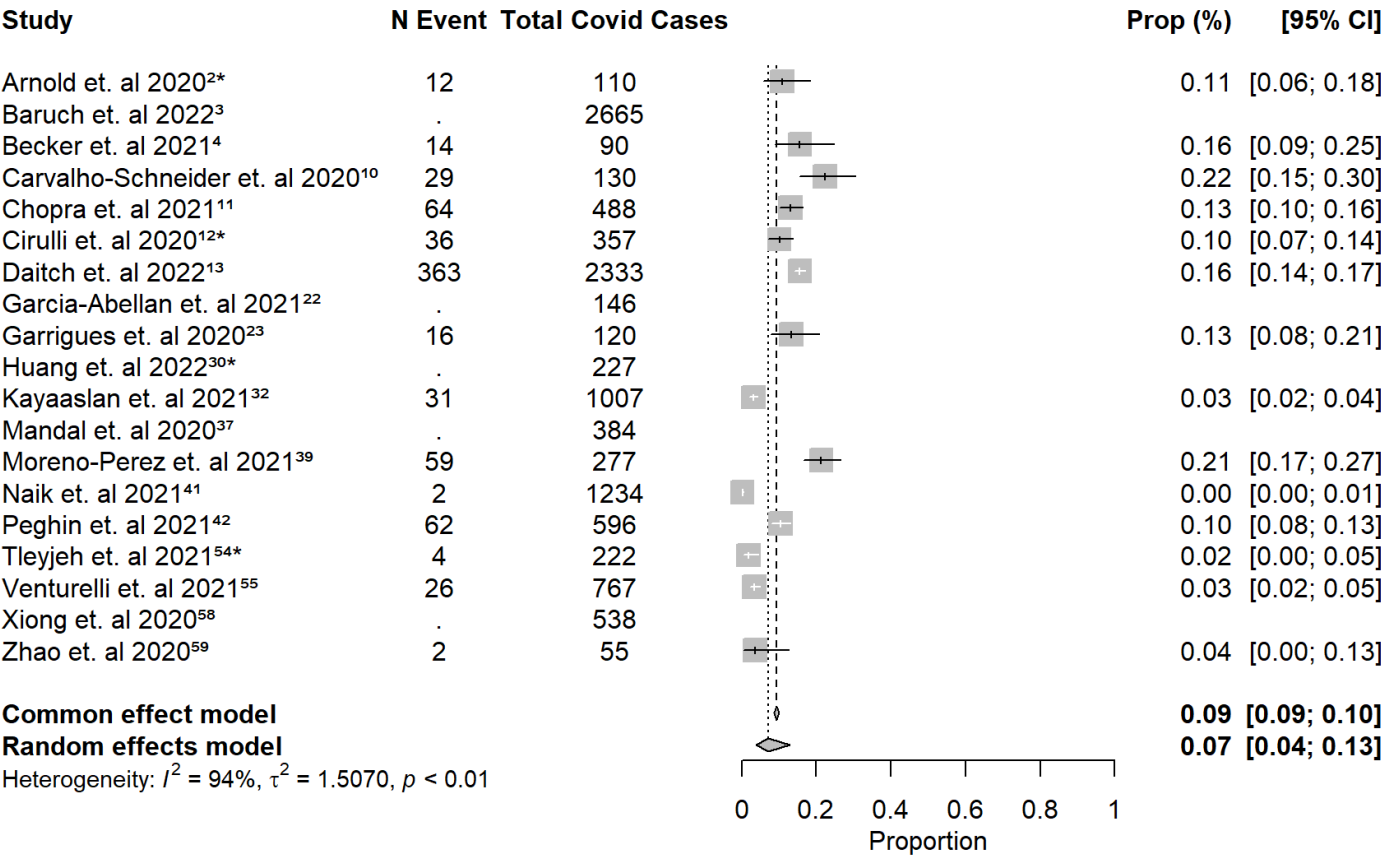

\* indicates value estimated from a figure

Analysis 2

Loss Of Or Change In Smell Or Taste: Risk of Bias Low

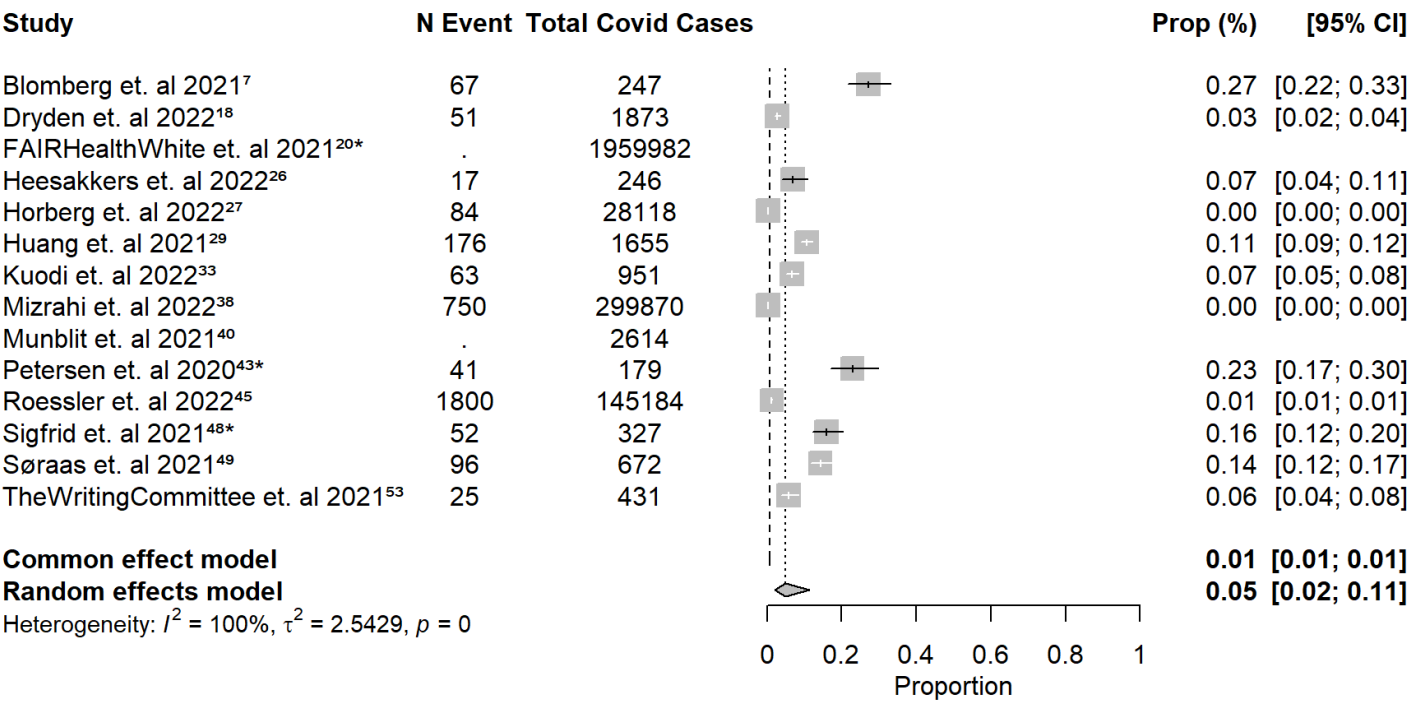

\* indicates value estimated from a figure

# Mental Health Concerns:

Analysis 2  
Mental Health Concerns: Risk of Bias High

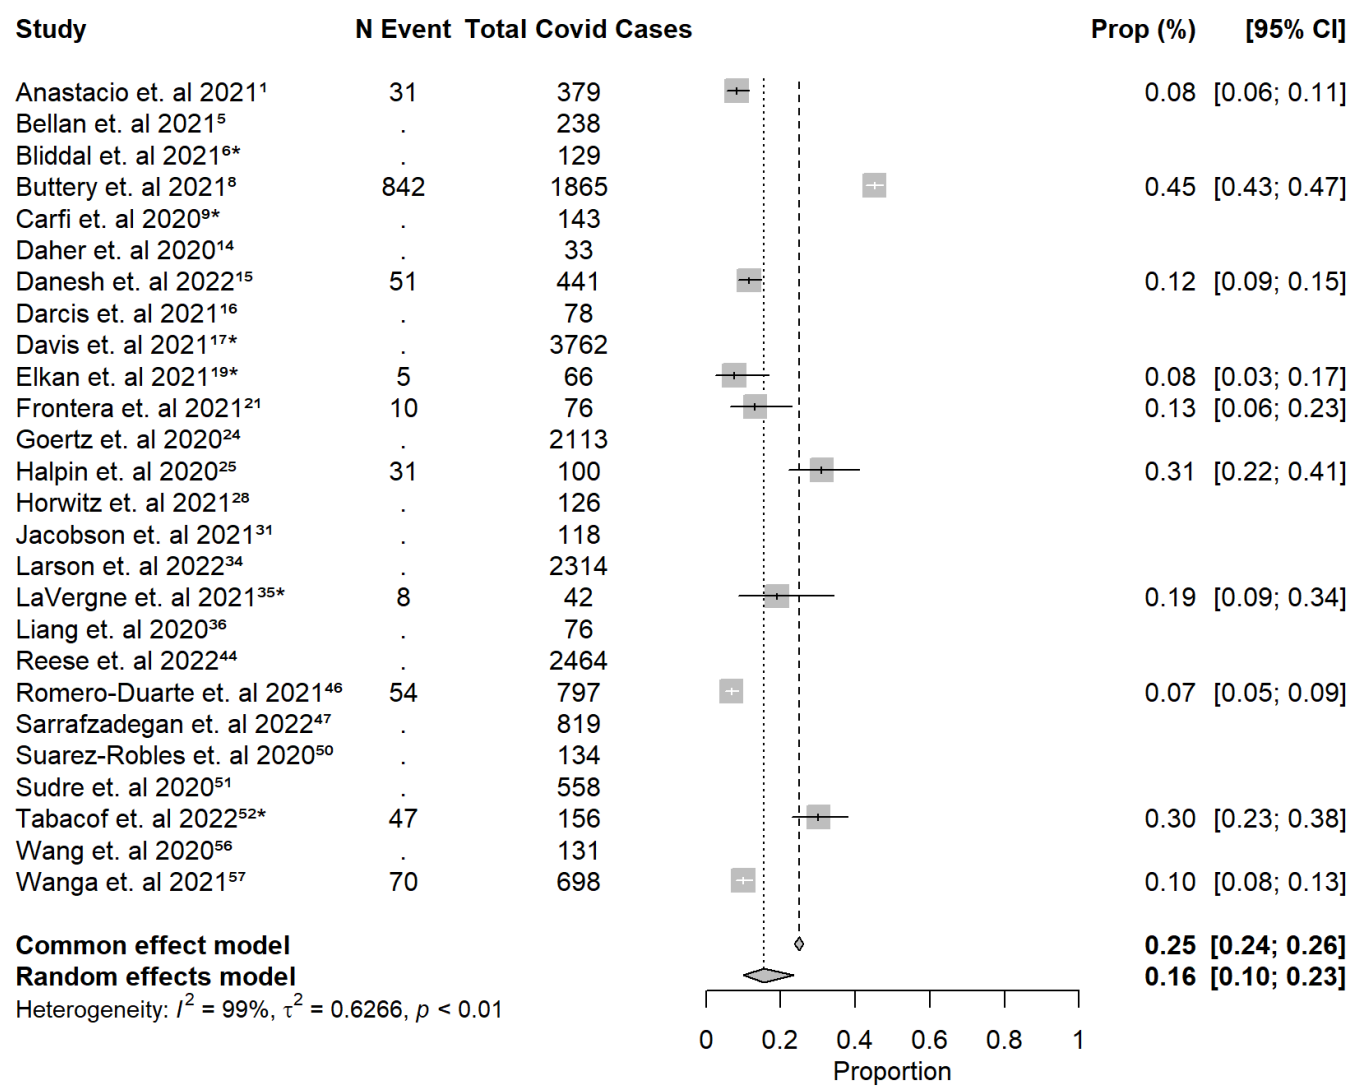

\* indicates value estimated from a figure

Analysis 2

Mental Health Concerns: Risk of Bias Moderate

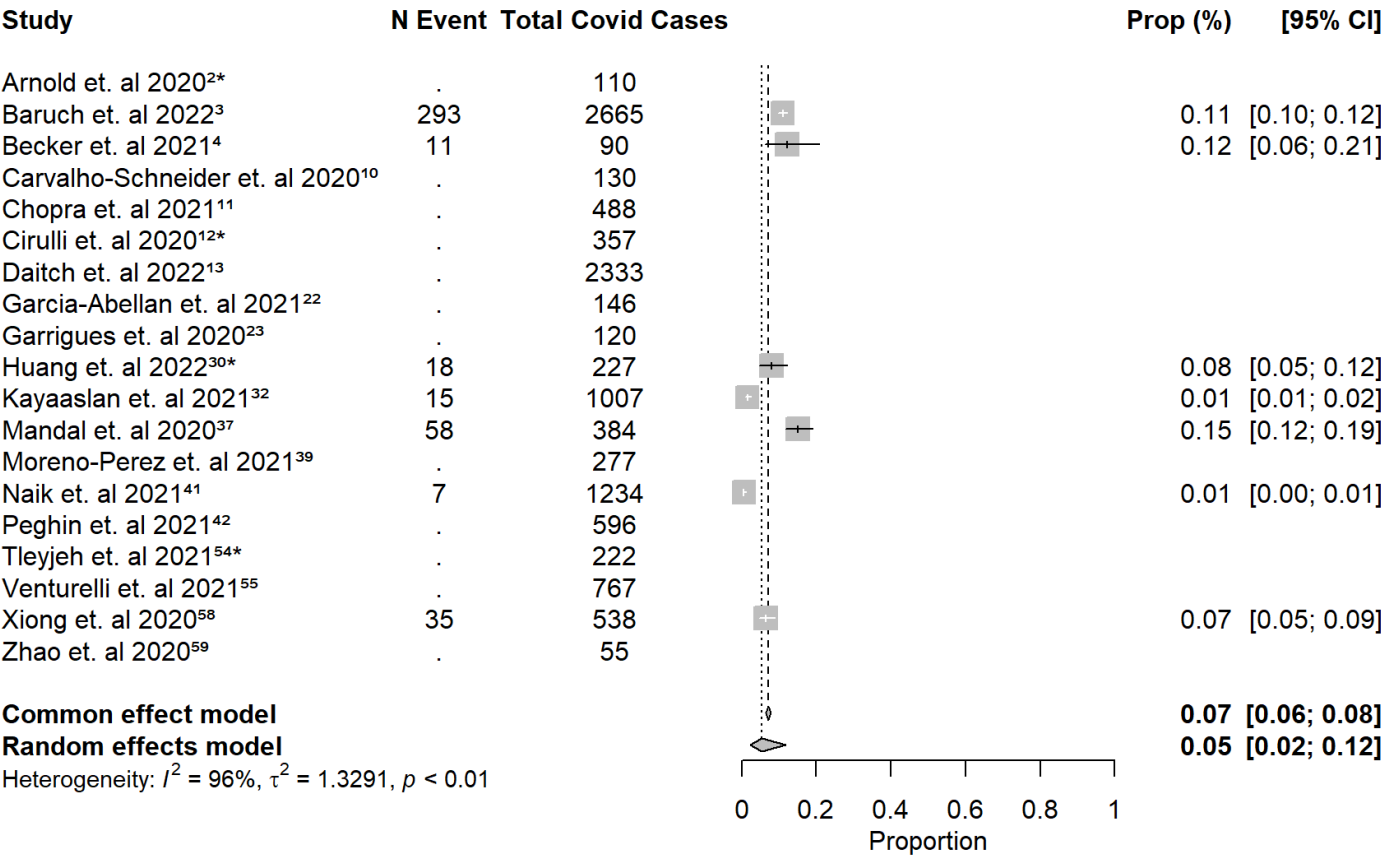

\* indicates value estimated from a figure

Analysis 2

Mental Health Concerns: Risk of Bias Low

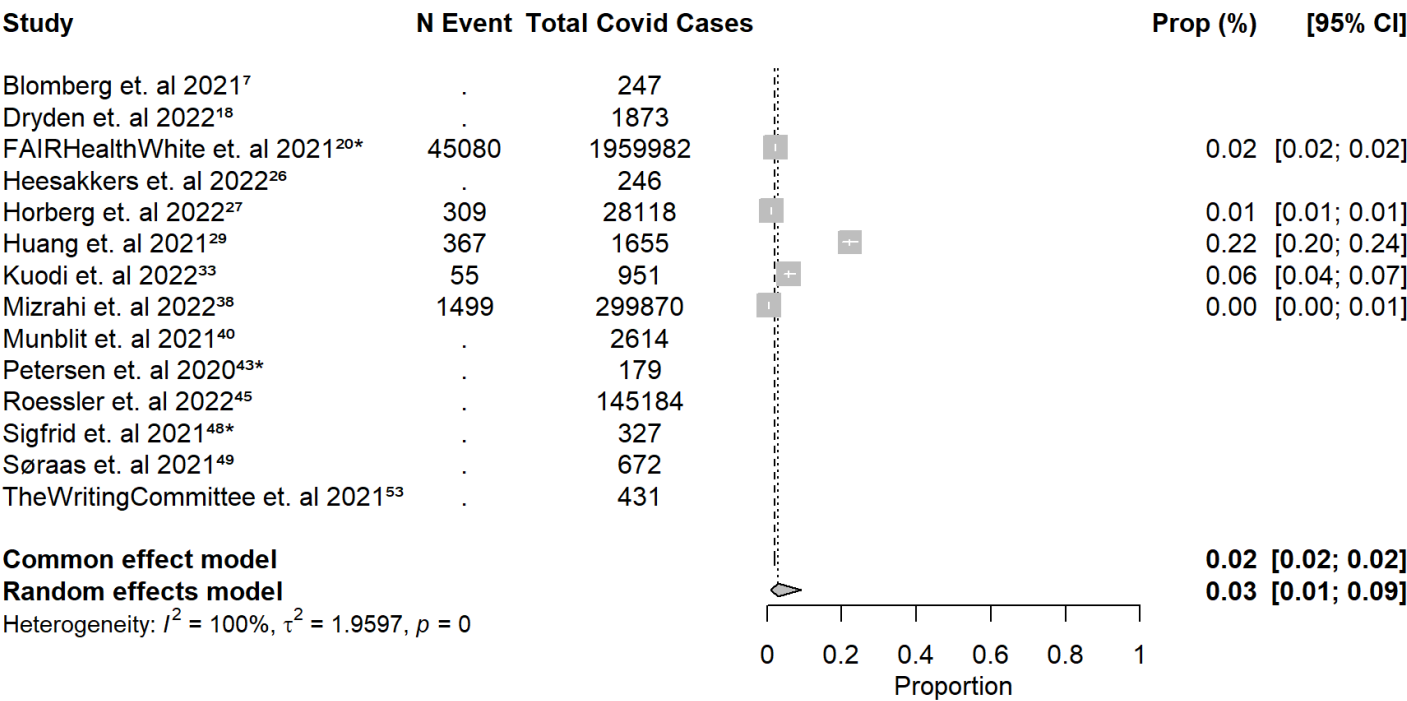

\* indicates value estimated from a figure

Joint Muscle Pain:

Analysis 2  
Joint Muscle Pain: Risk of Bias High

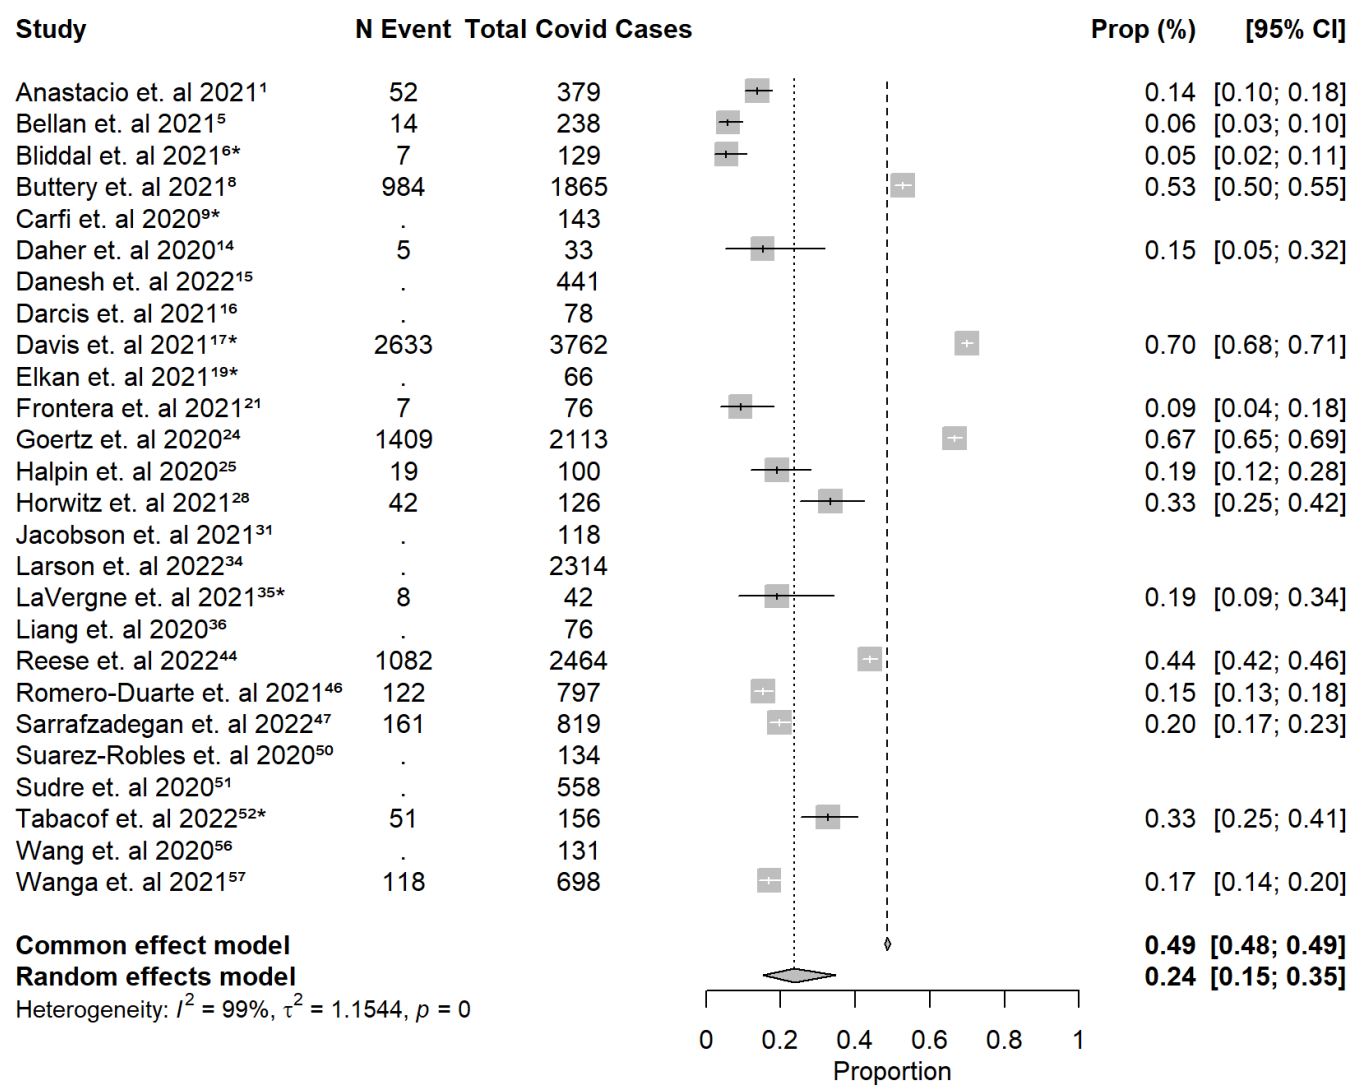

\* indicates value estimated from a figure



Analysis 2  
Joint Muscle Pain: Risk of Bias Moderate

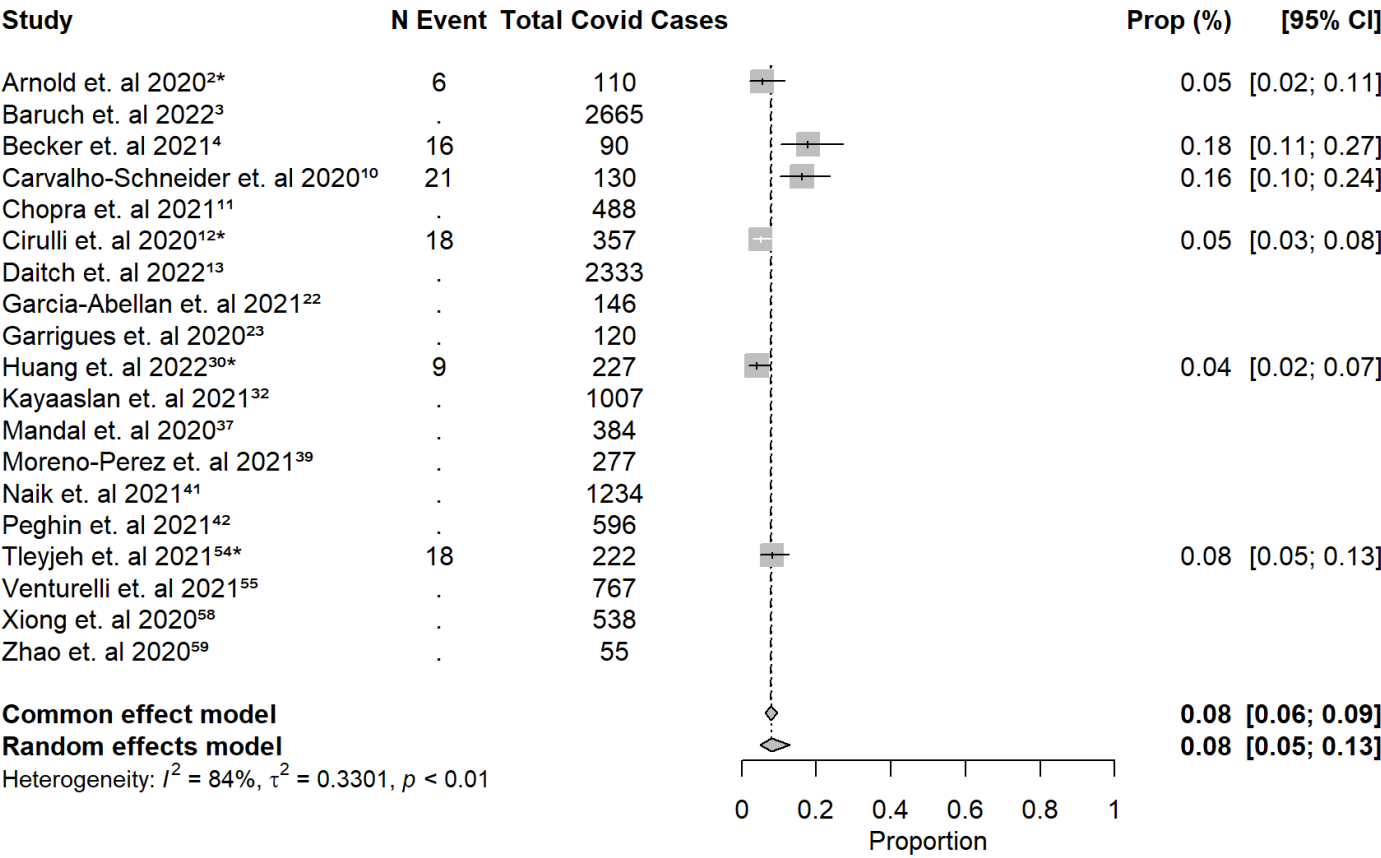

\* indicates value estimated from a figure

Analysis 2  
Joint Muscle Pain: Risk of Bias Low

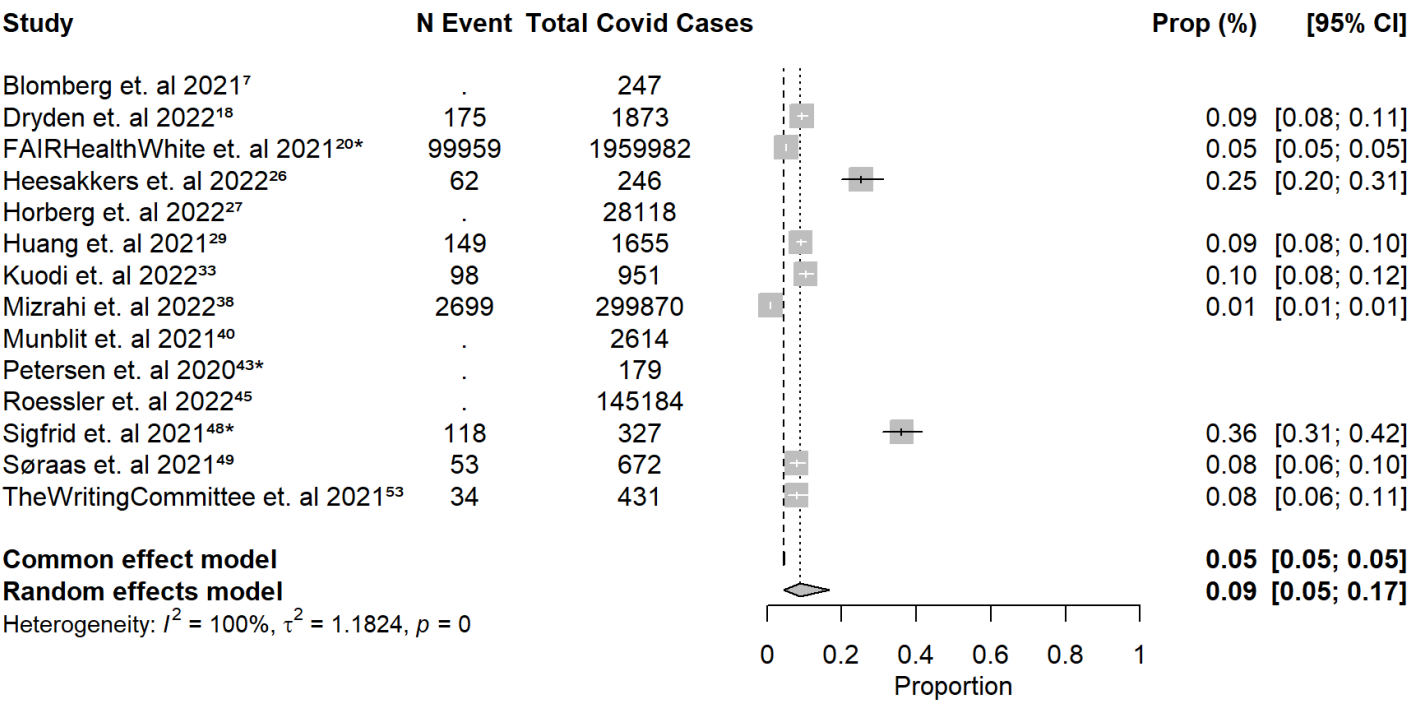

\* indicates value estimated from a figure

# Weakness In Arms Or Legs:

## Analysis 2 Weakness In Arms Or Legs: Risk of Bias Low

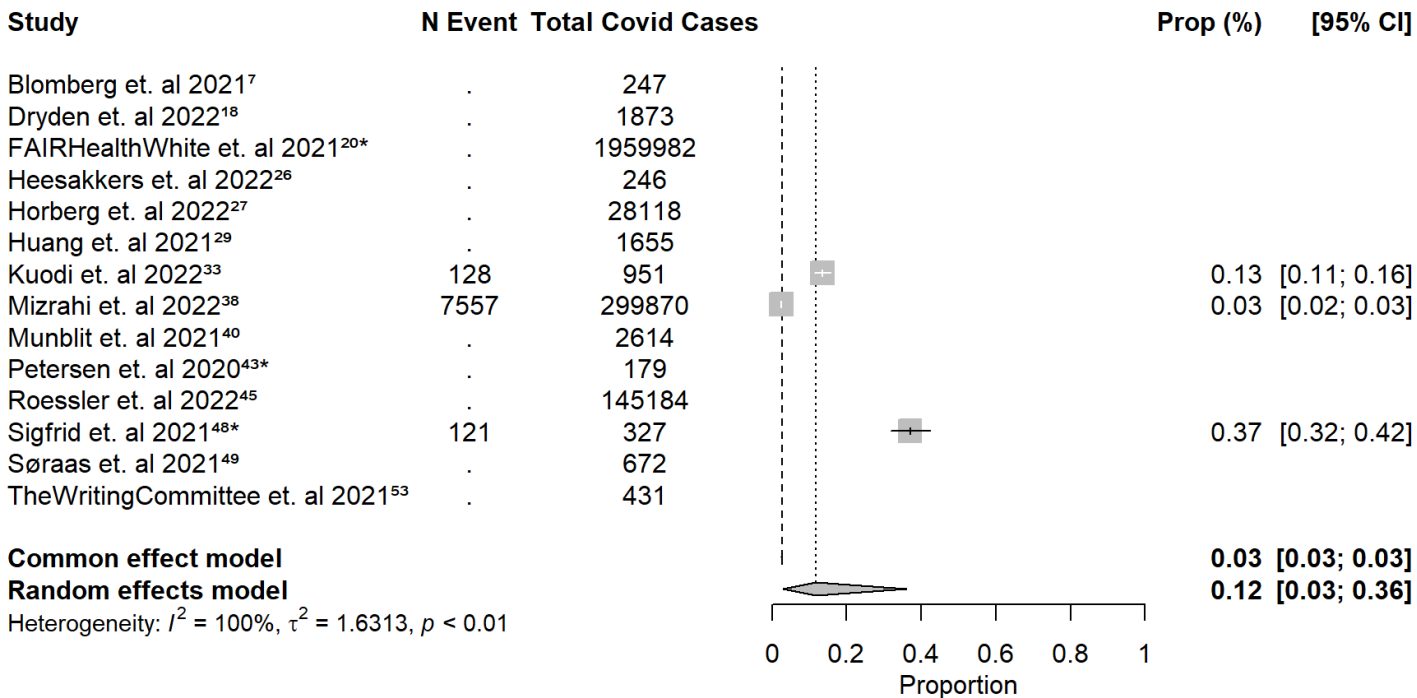

\* indicates value estimated from a figure

# Gi Symptoms Including Abdominal Pain:

## Analysis 2

### Gi Symptoms Including Abdominal Pain: Risk of Bias High

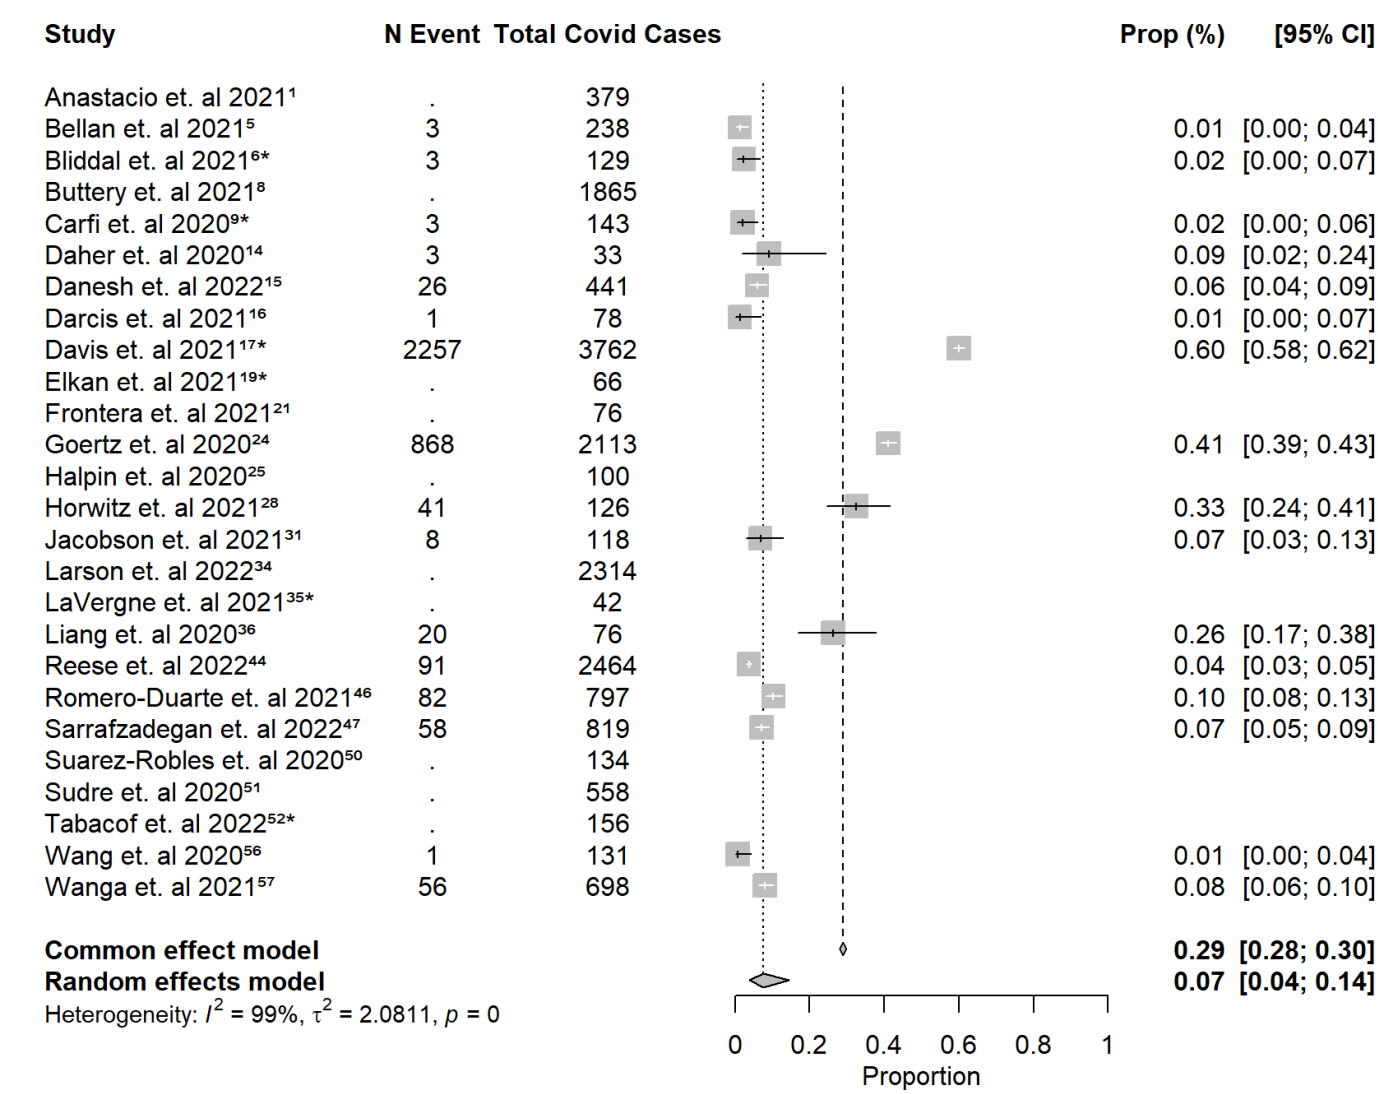

## Analysis 2

### Gi Symptoms Including Abdominal Pain: Risk of Bias Moderate

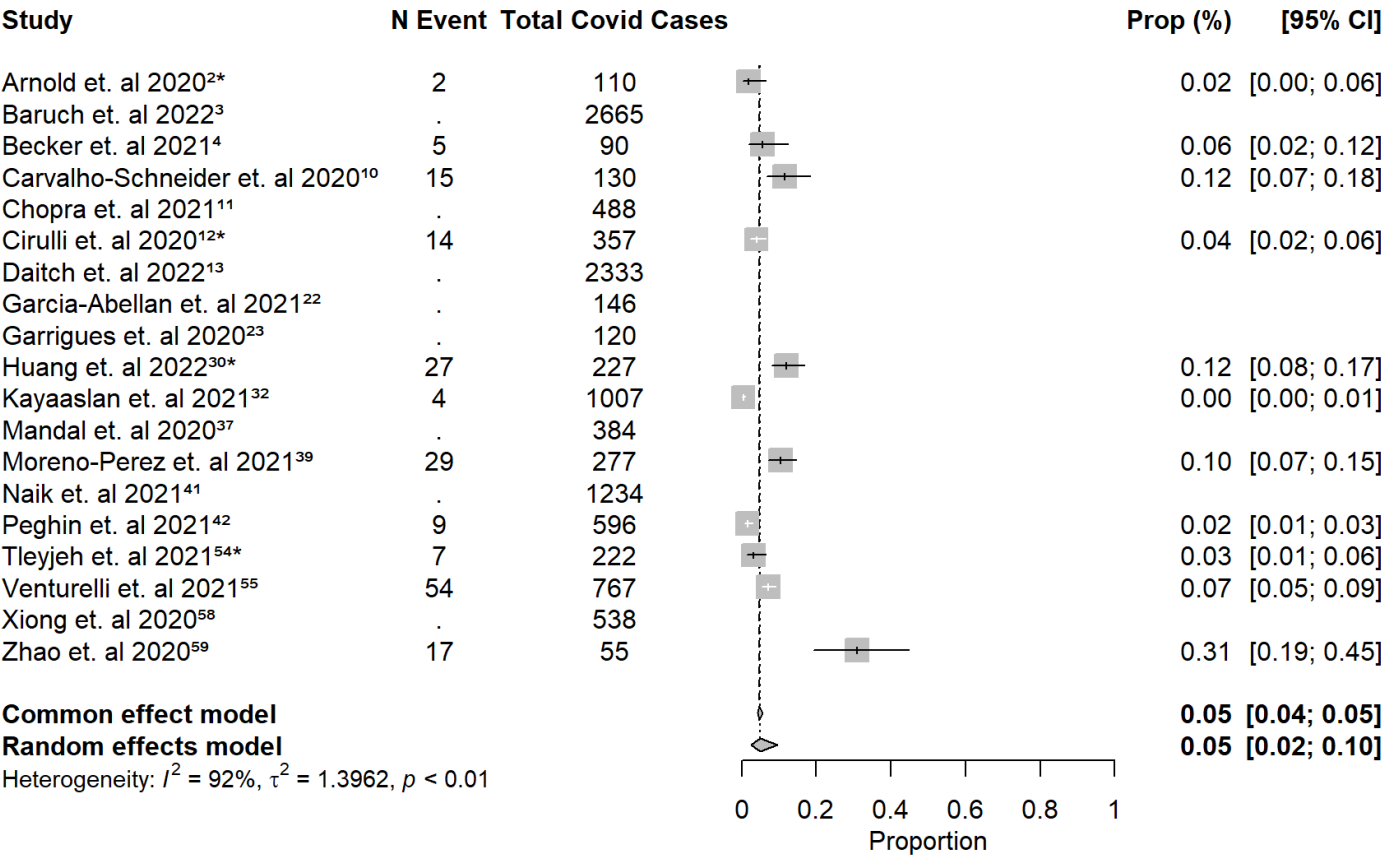

\* indicates value estimated from a figure

Analysis 2

Gi Symptoms Including Abdominal Pain: Risk of Bias Low

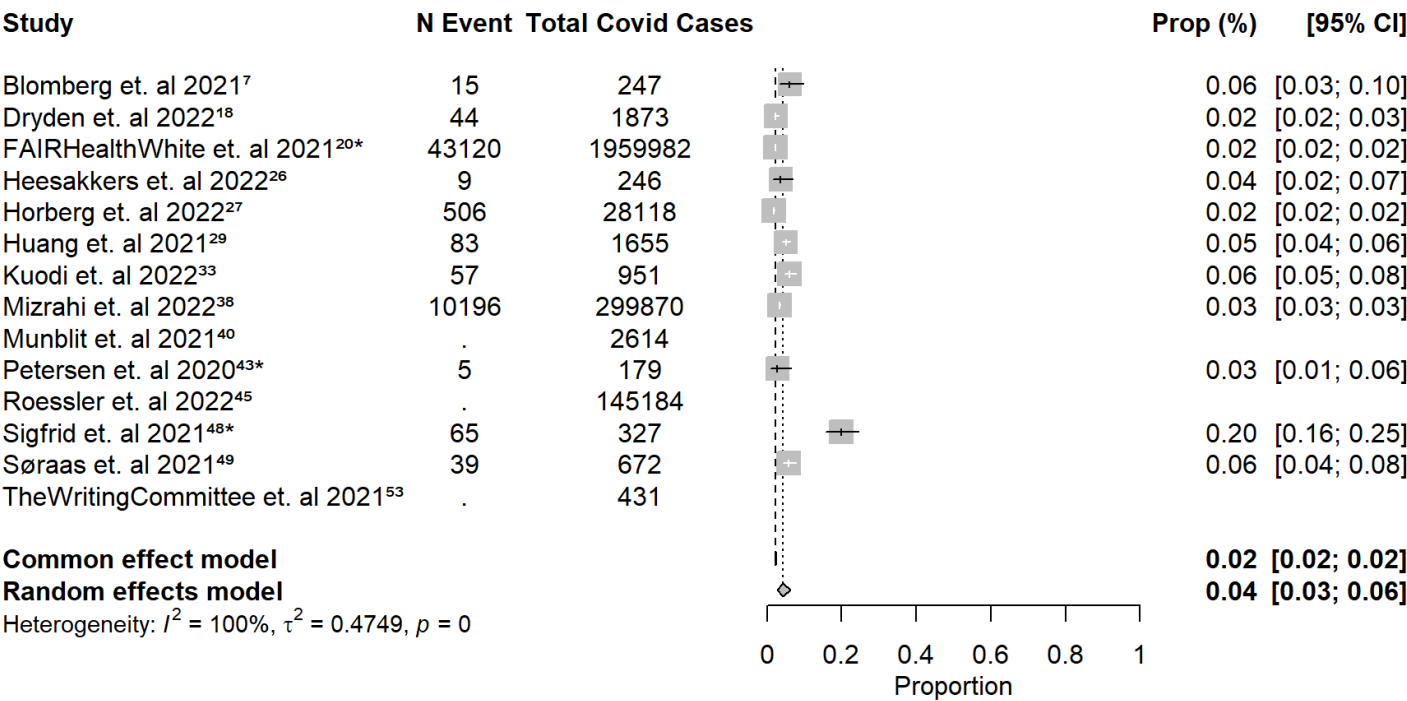

\* indicates value estimated from a figure

Urinary Symptoms:

Analysis 2  
Urinary Symptoms: Risk of Bias Moderate

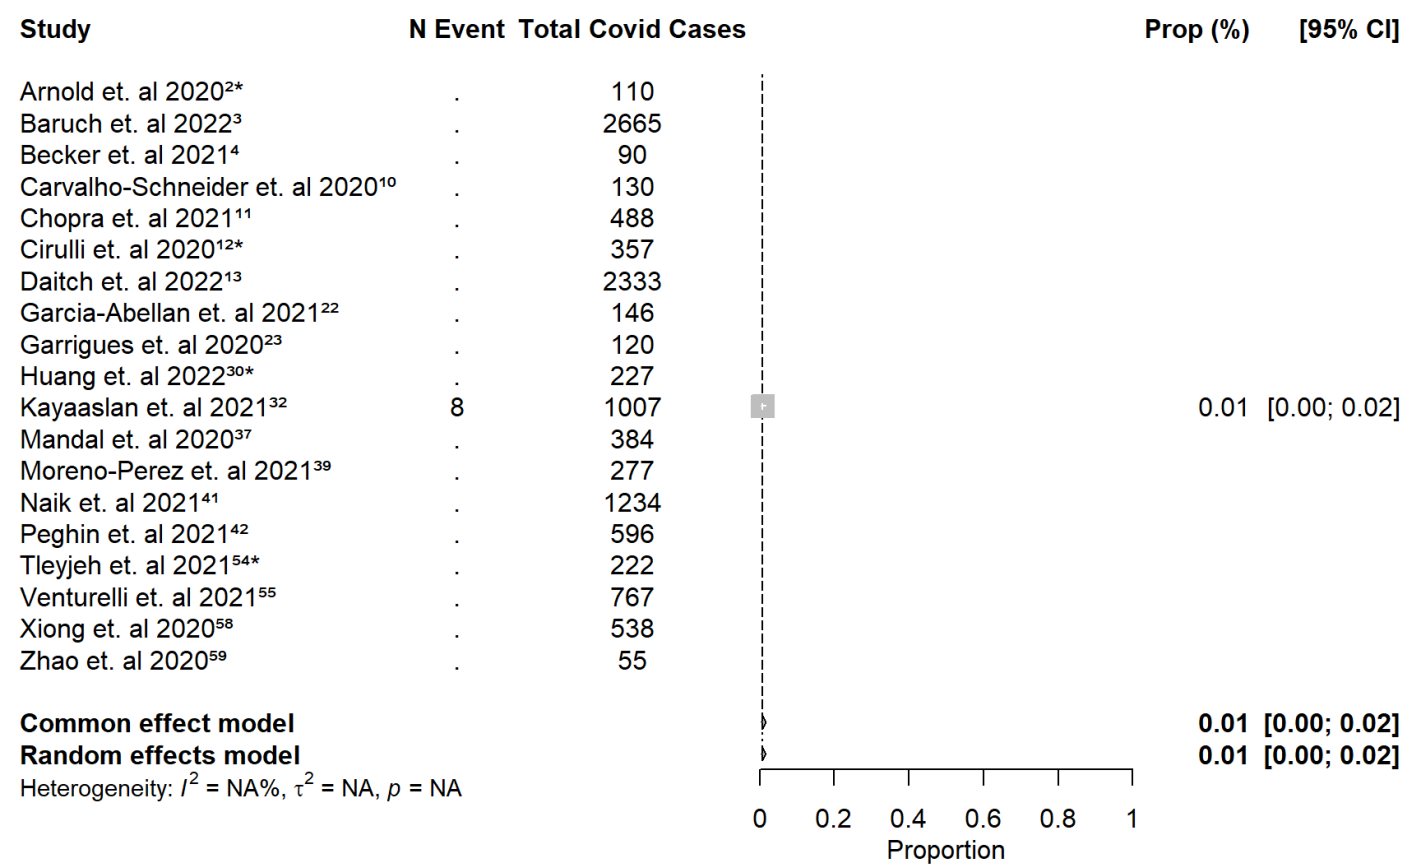

\* indicates value estimated from a figure

Analysis 2

Urinary Symptoms: Risk of Bias Low

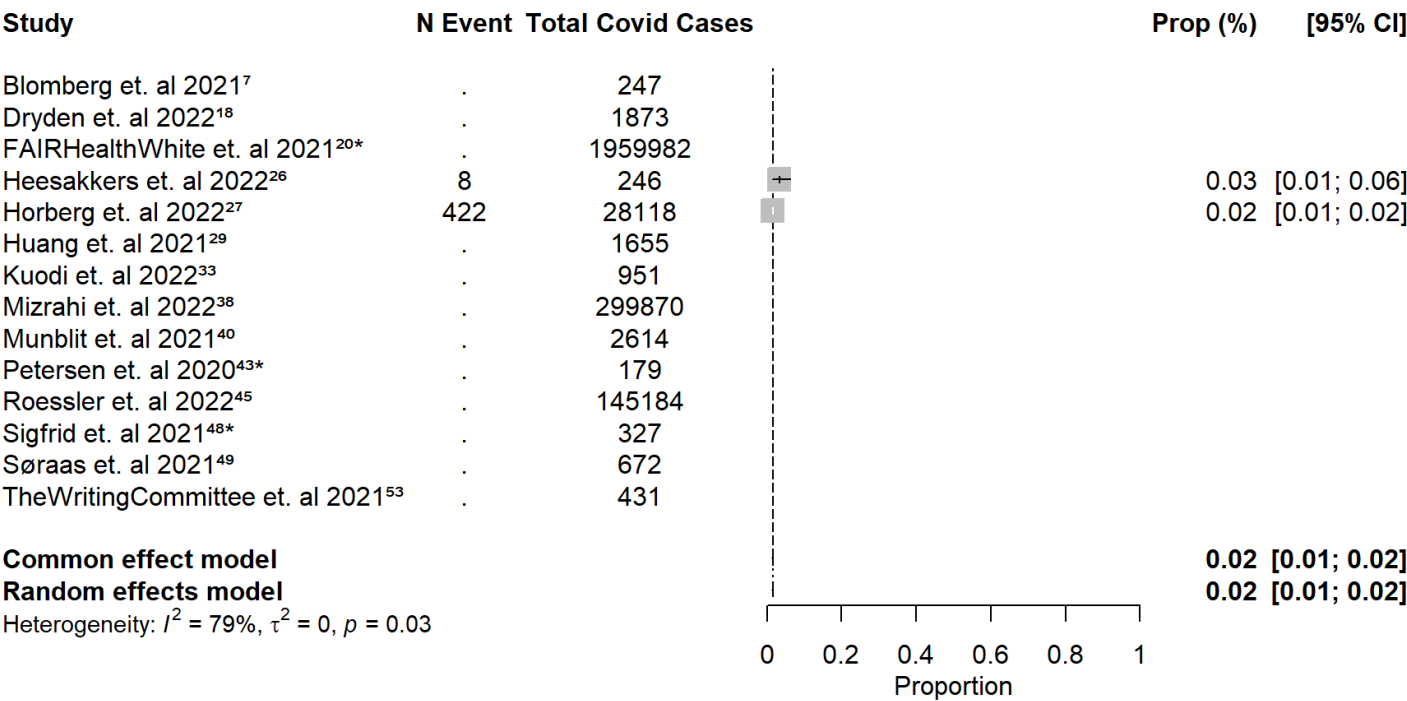

\* indicates value estimated from a figure



Hair Loss:

Analysis 2  
Hair Loss: Risk of Bias High

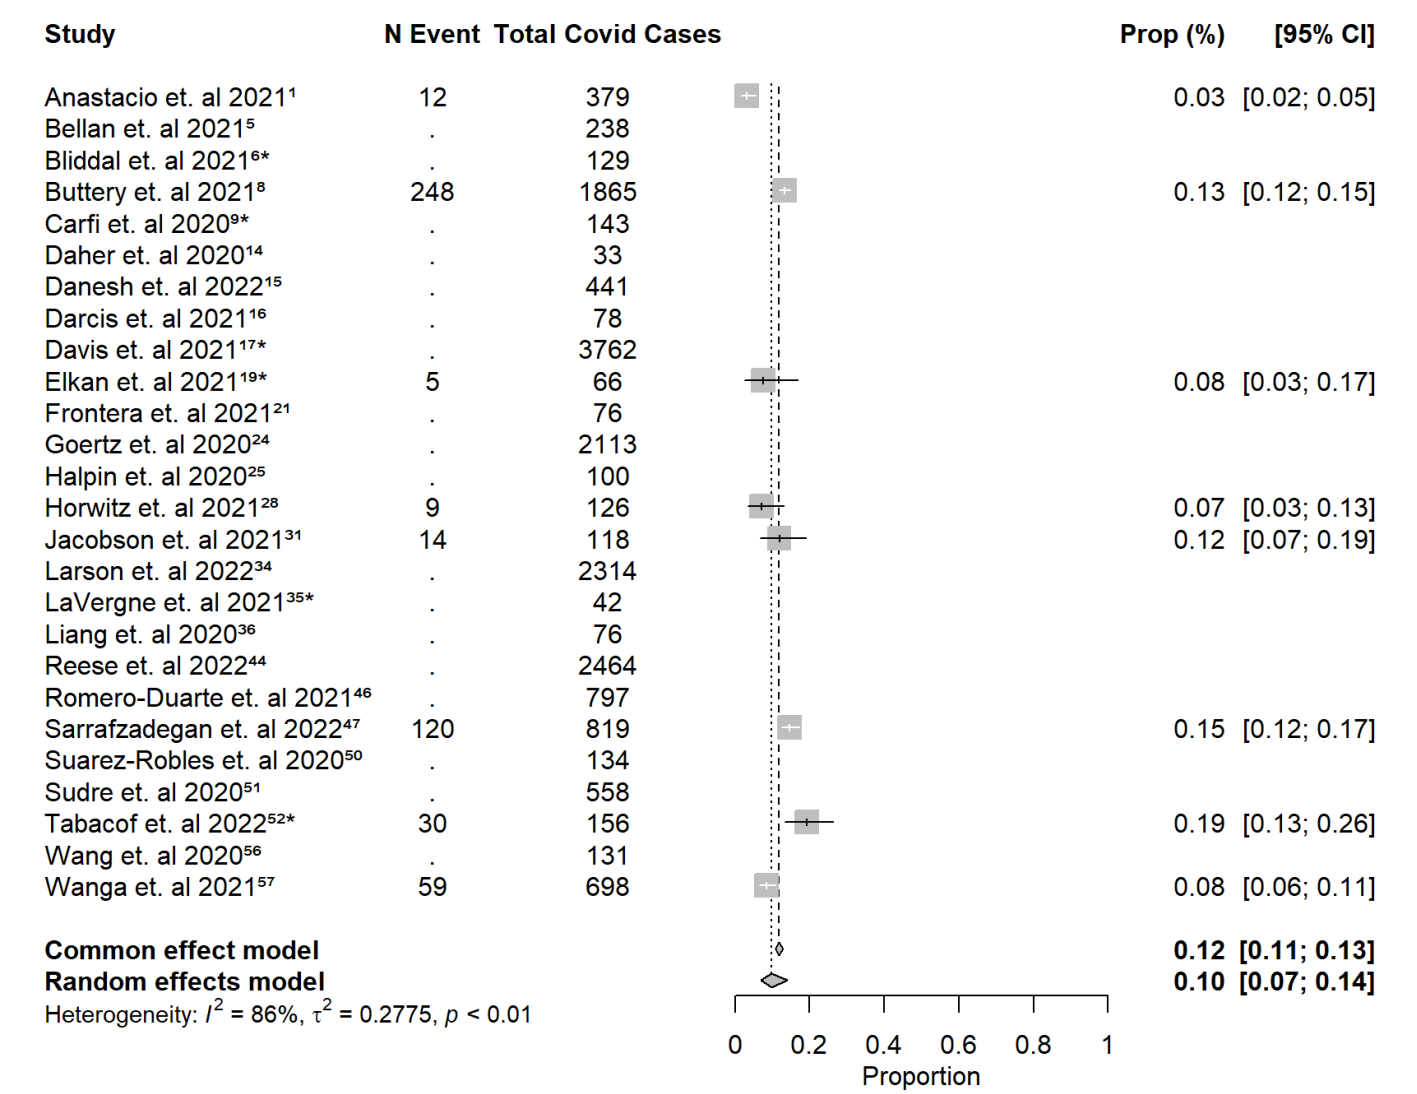

\* indicates value estimated from a figure

Analysis 2  
Hair Loss: Risk of Bias Moderate

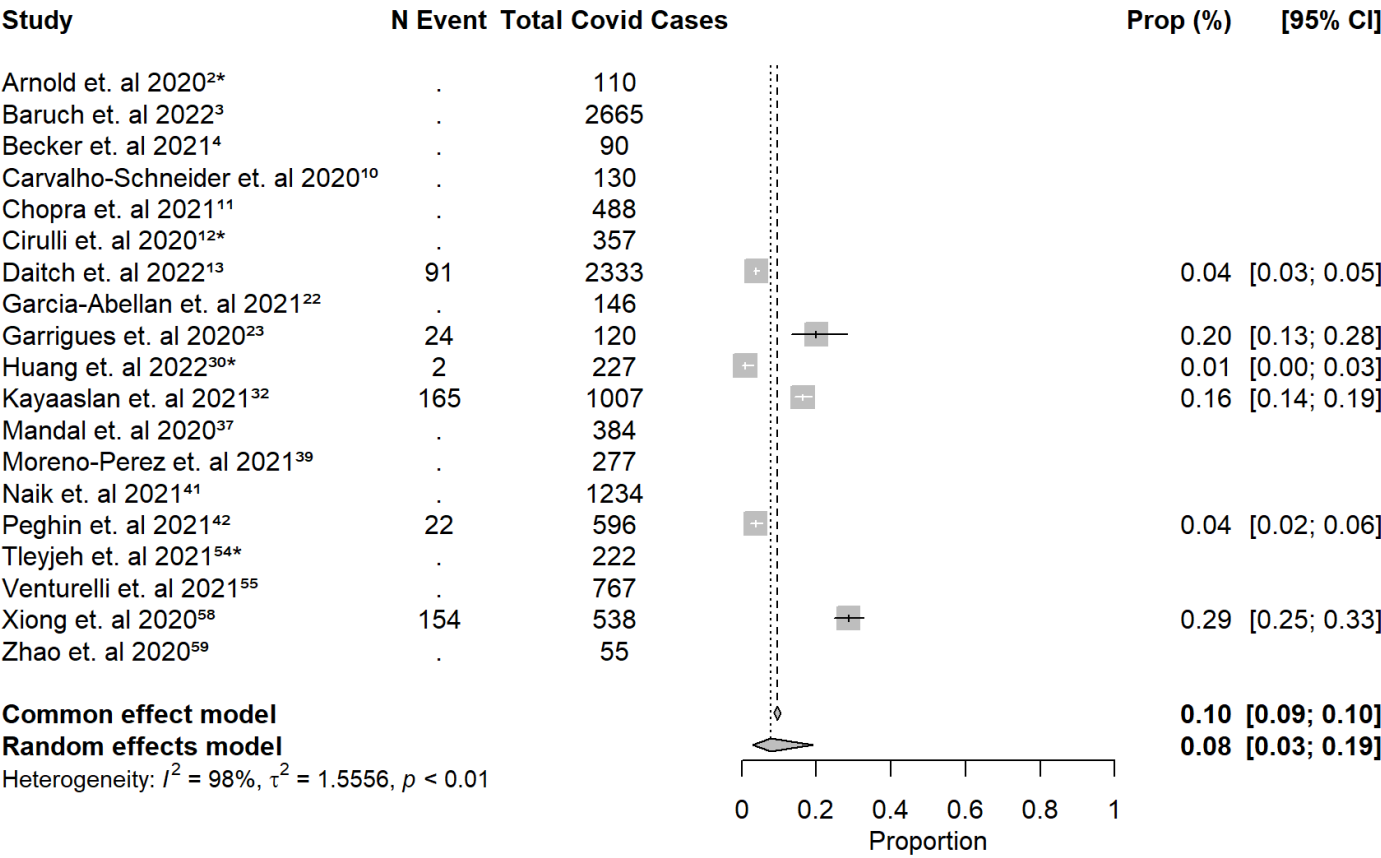

\* indicates value estimated from a figure

Analysis 2

Hair Loss: Risk of Bias Low

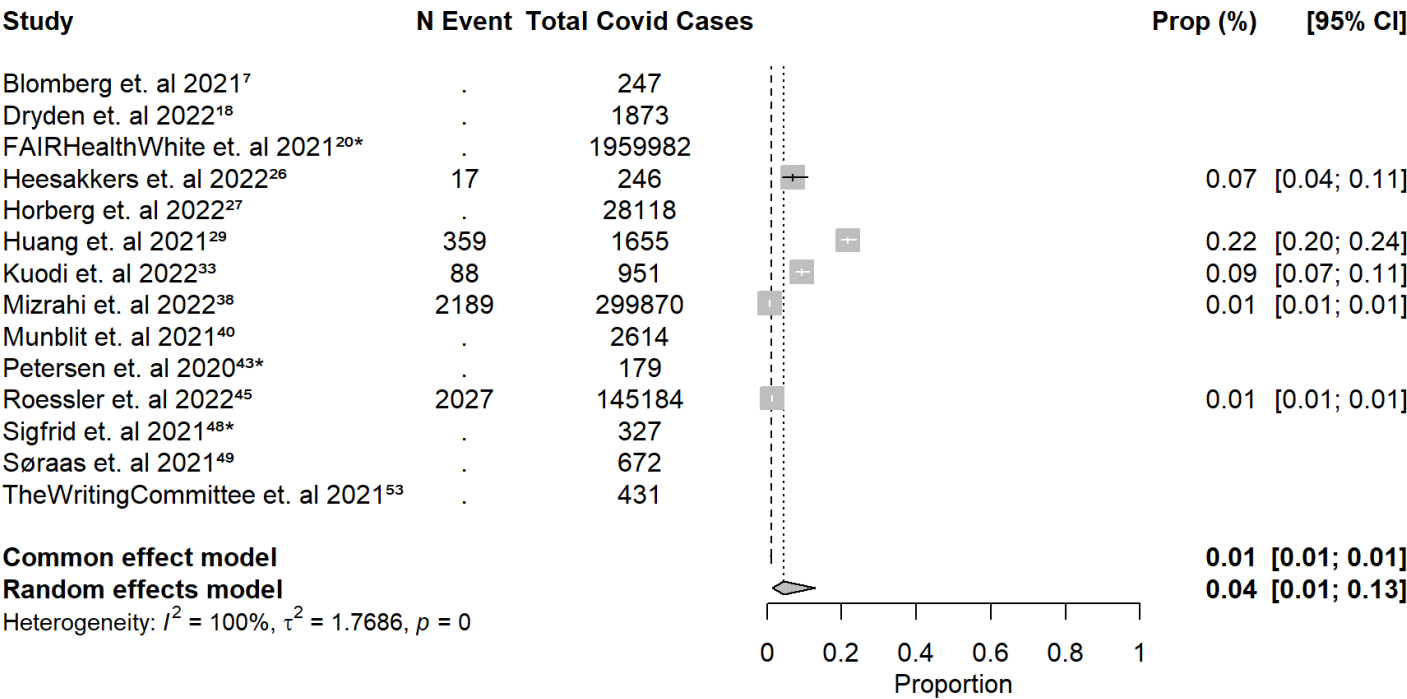

\* indicates value estimated from a figure

Skin Rash:

Analysis 2  
Skin Rash: Risk of Bias High

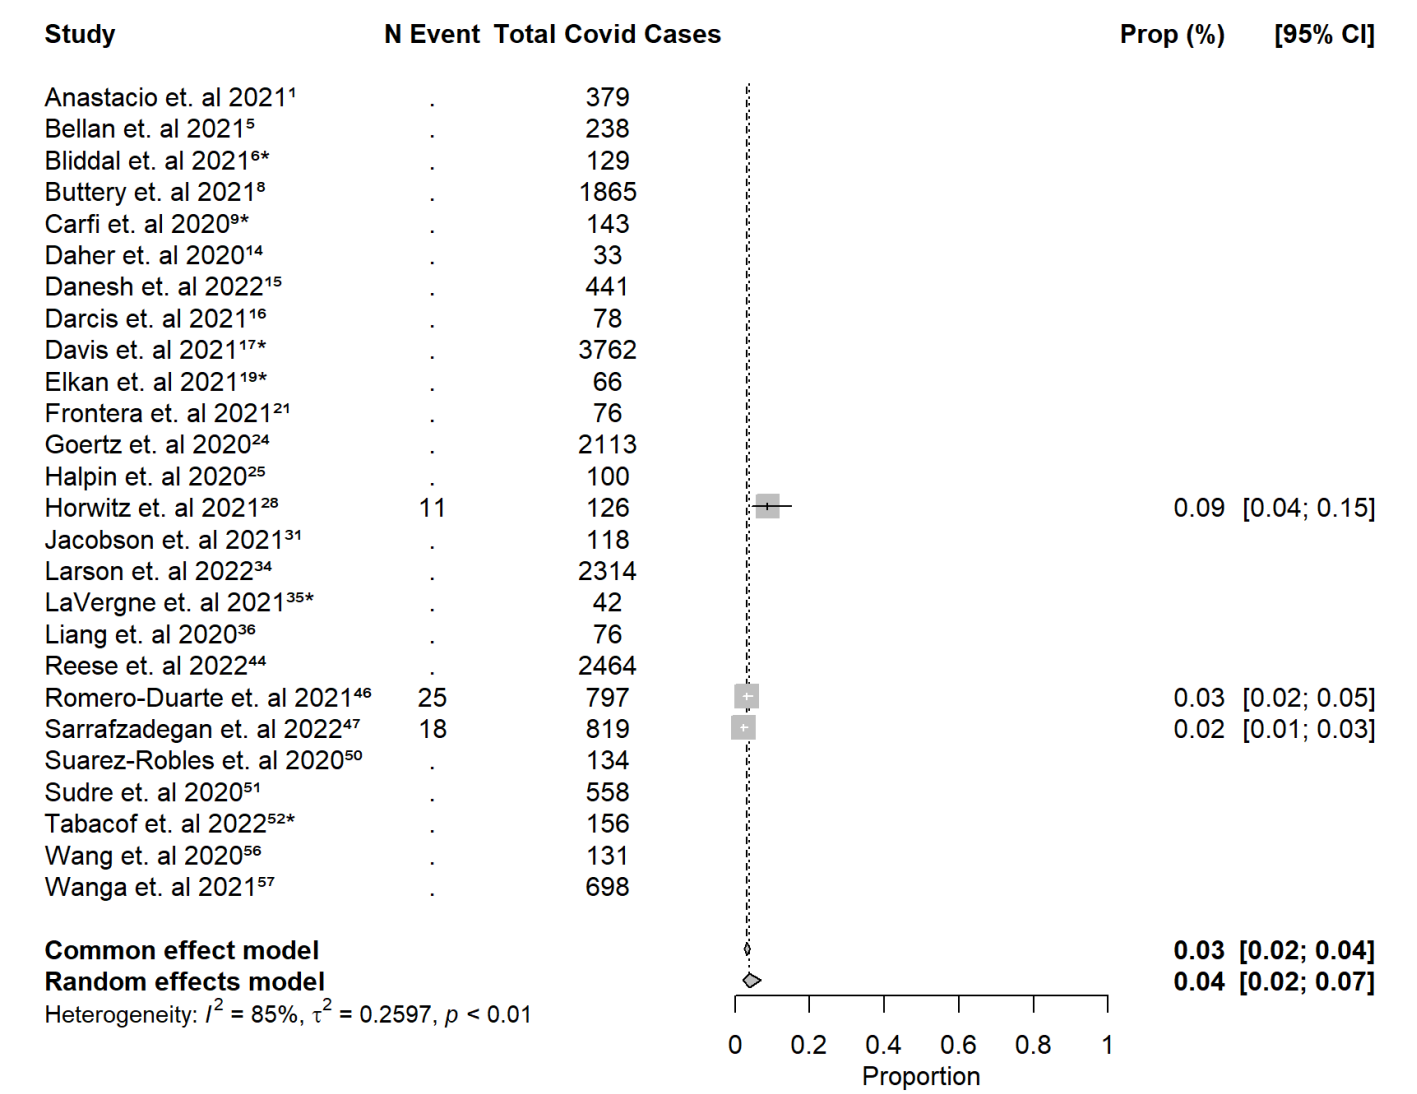

\* indicates value estimated from a figure

Analysis 2  
Skin Rash: Risk of Bias Moderate

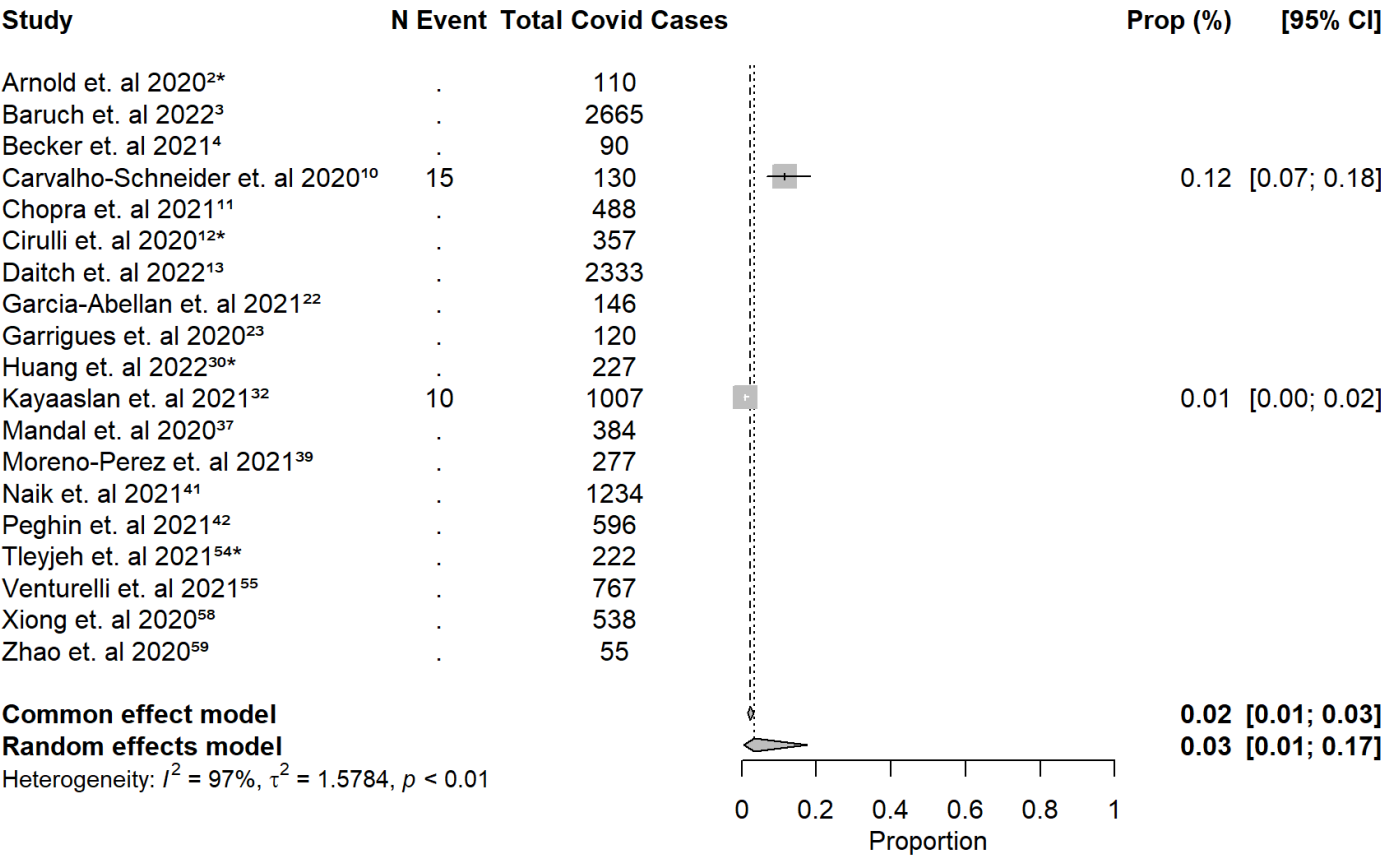

\* indicates value estimated from a figure

Analysis 2

Skin Rash: Risk of Bias Low

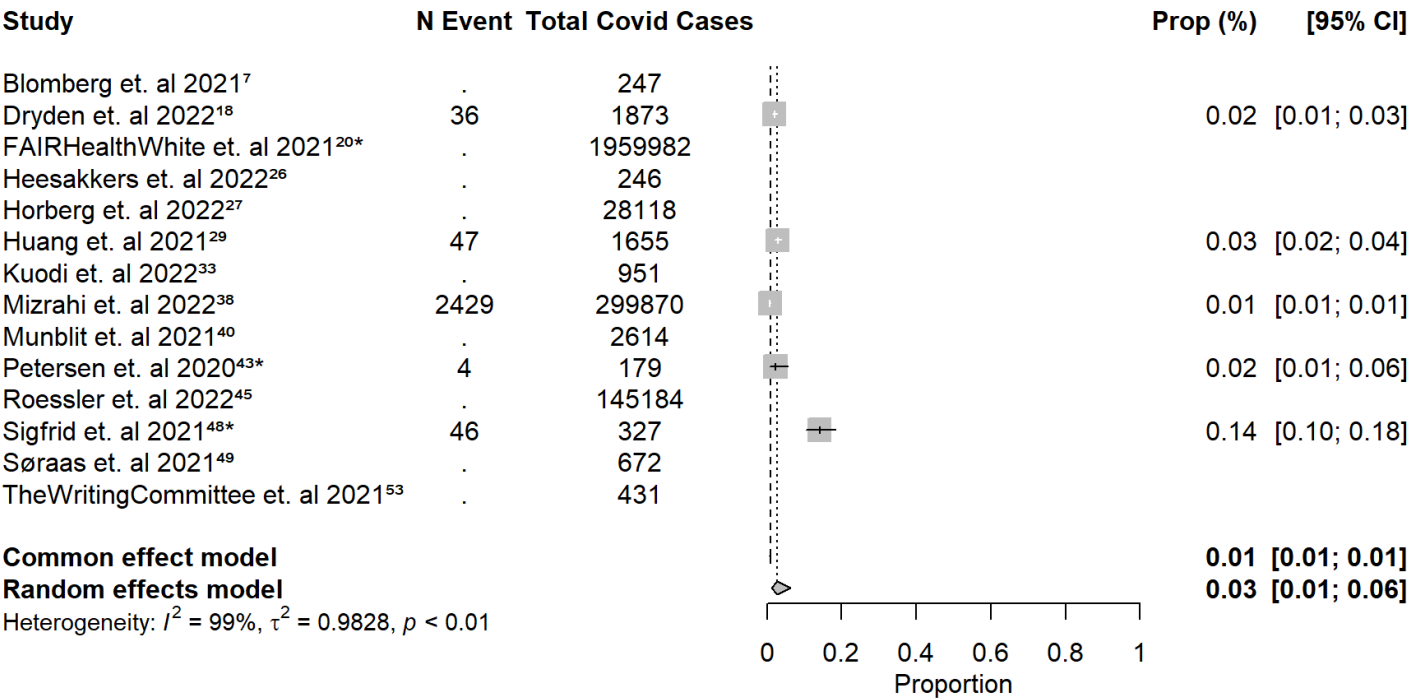

\* indicates value estimated from a figure

# Hearing Problems:

## Analysis 2

### Hearing Problems: Risk of Bias High

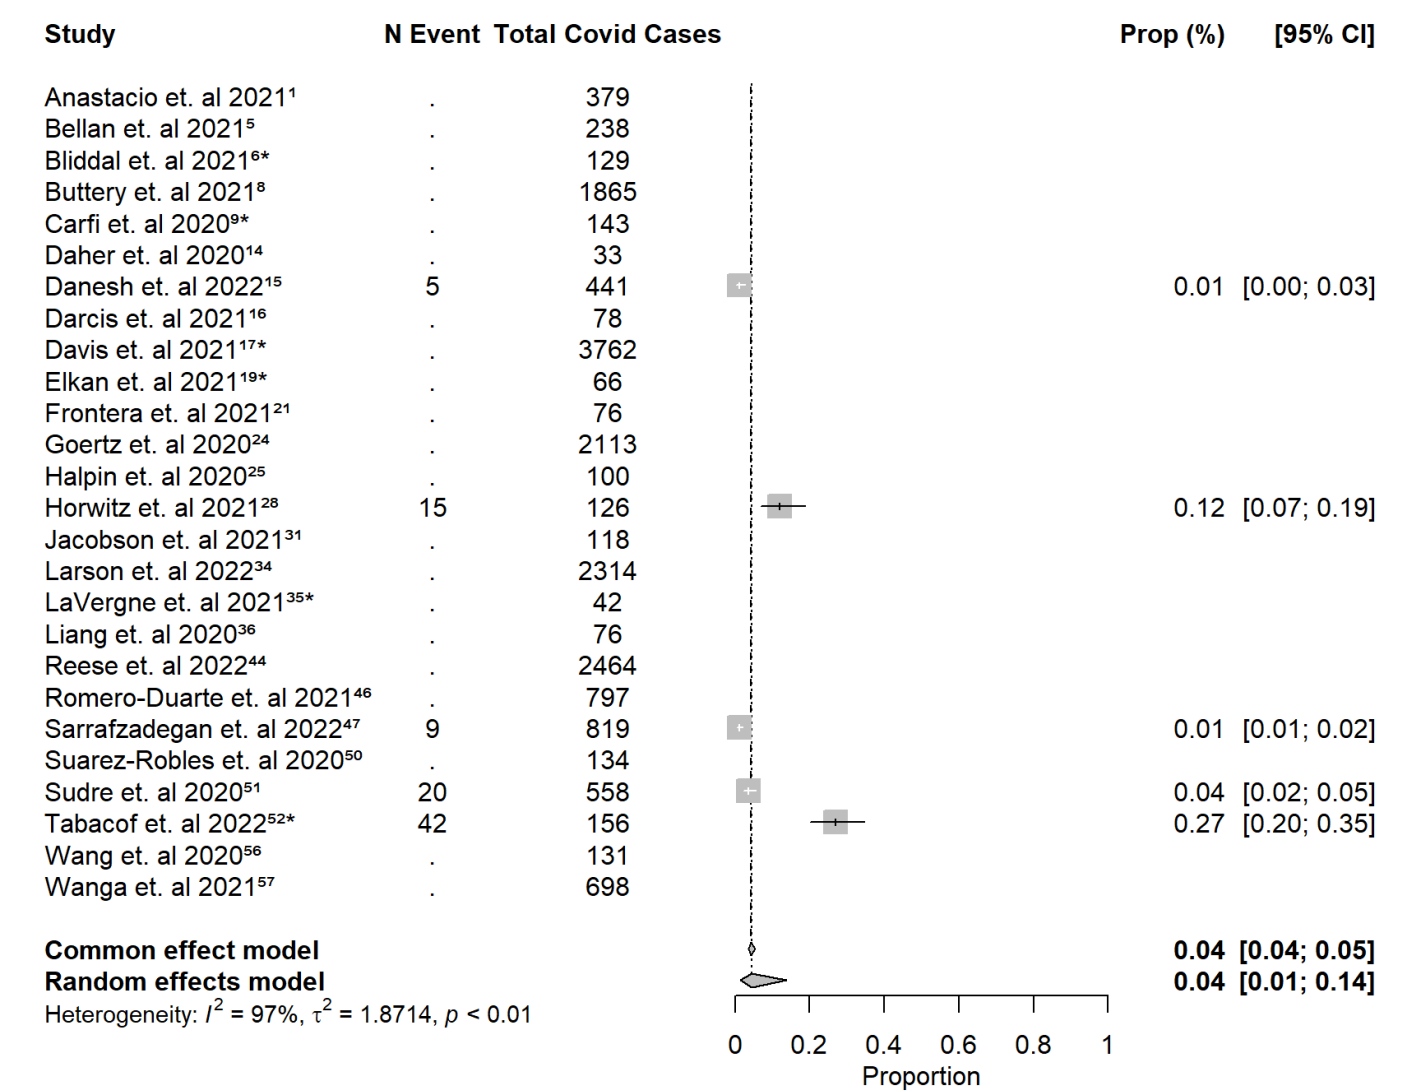

\* indicates value estimated from a figure

Analysis 2  
Hearing Problems: Risk of Bias Moderate

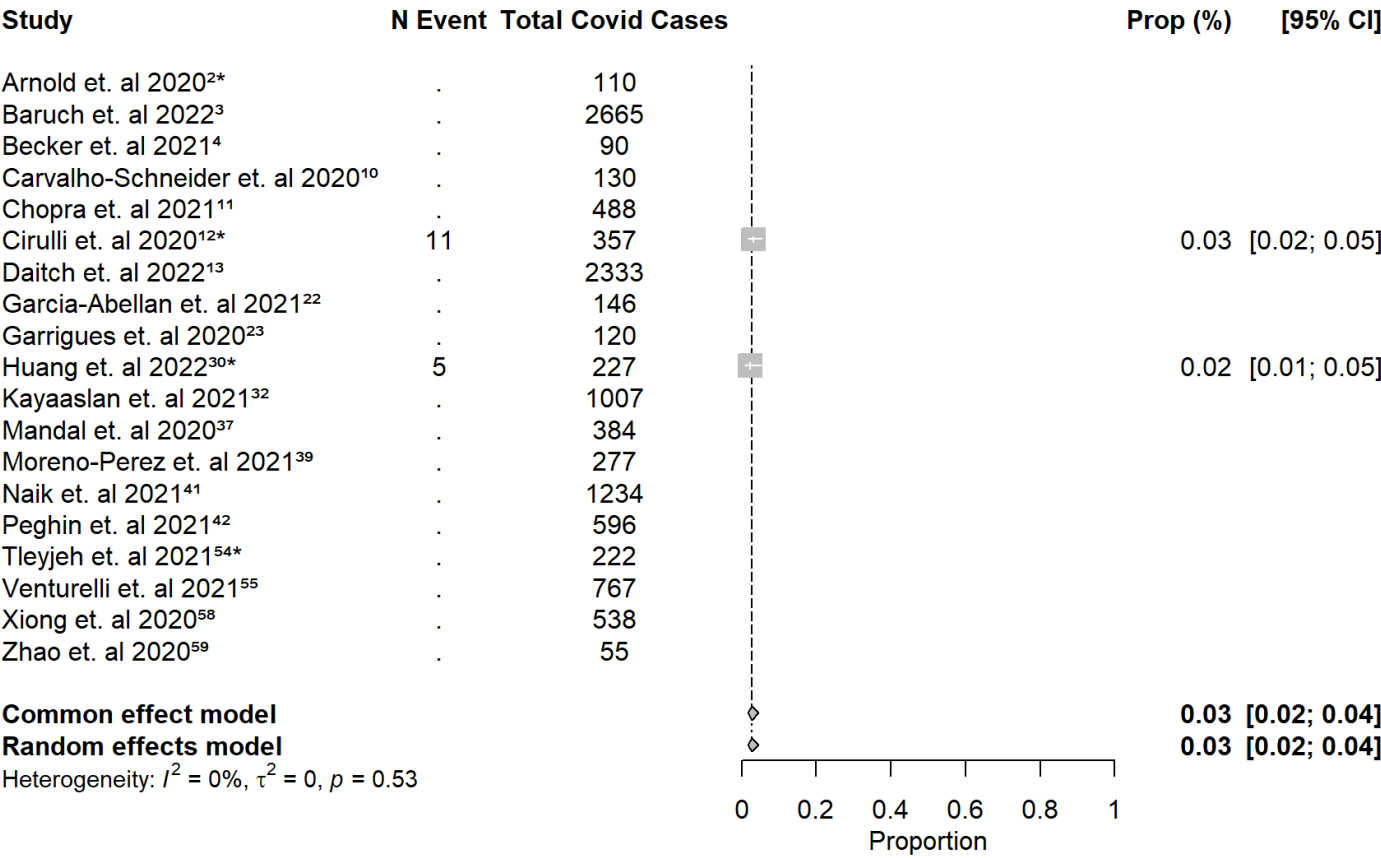

\* indicates value estimated from a figure



Analysis 2

Hearing Problems: Risk of Bias Low

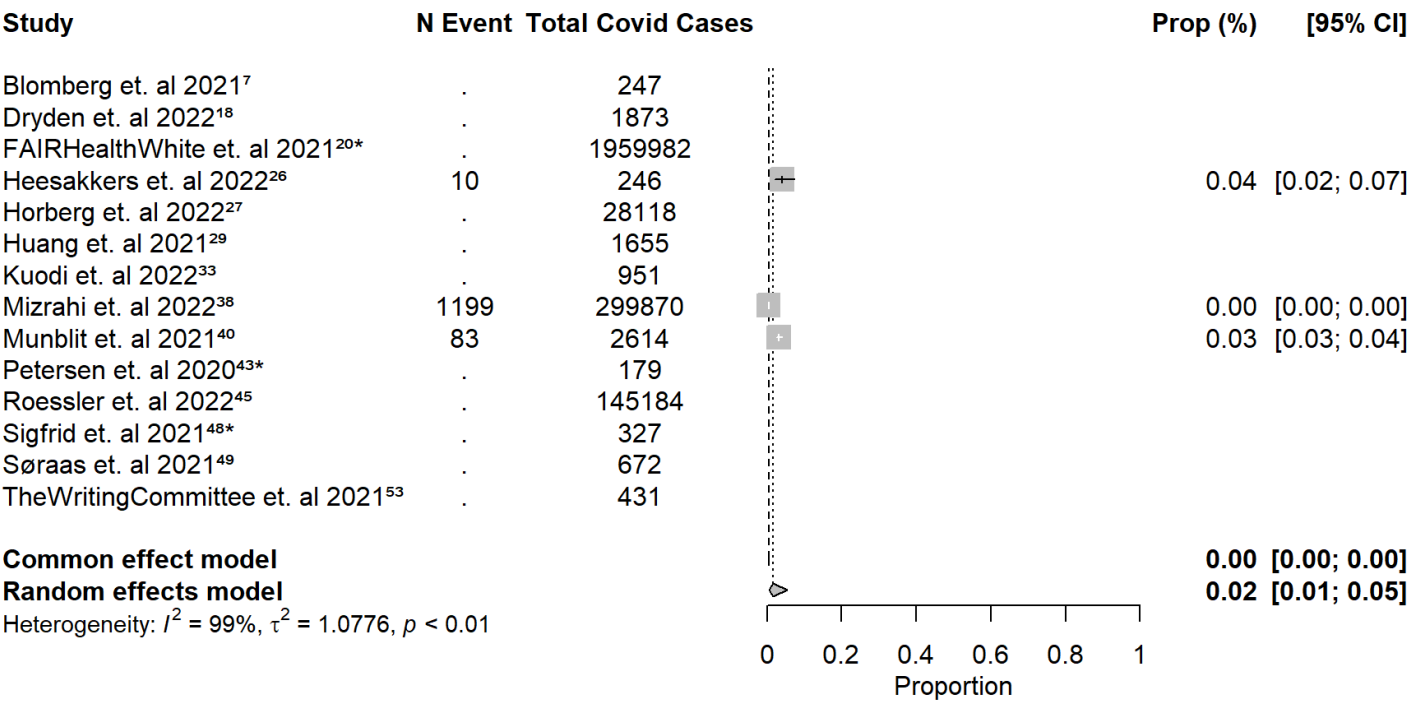

\* indicates value estimated from a figure

Vision Problems:

Analysis 2  
Vision Problems: Risk of Bias High

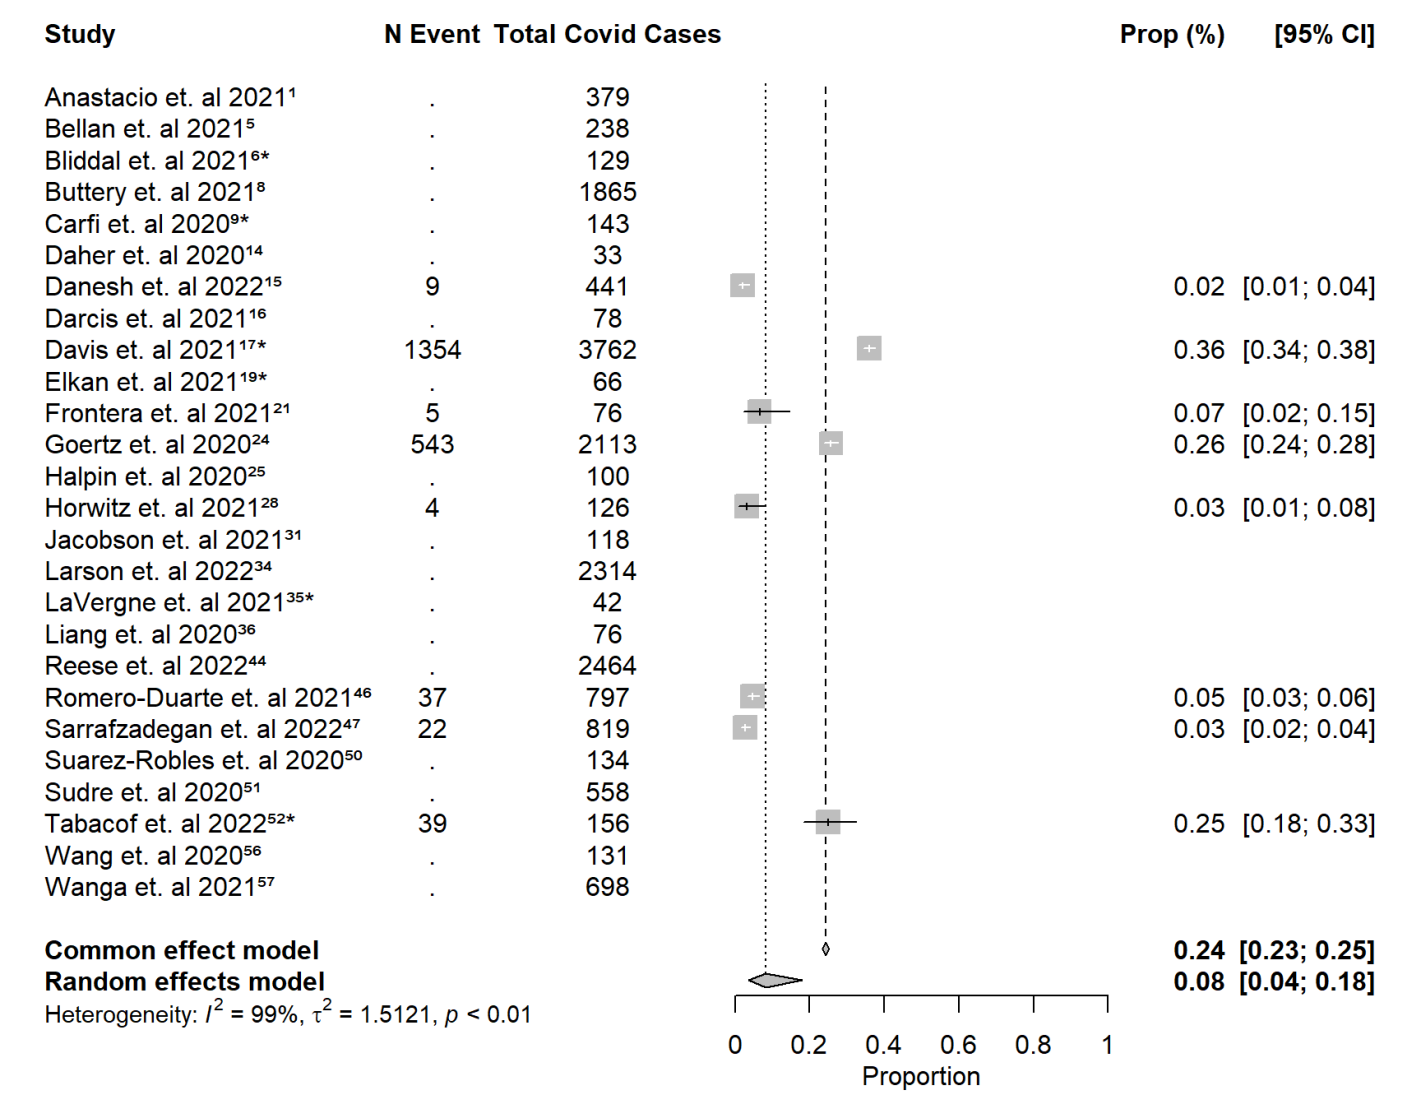

\* indicates value estimated from a figure

Analysis 2

Vision Problems: Risk of Bias Moderate

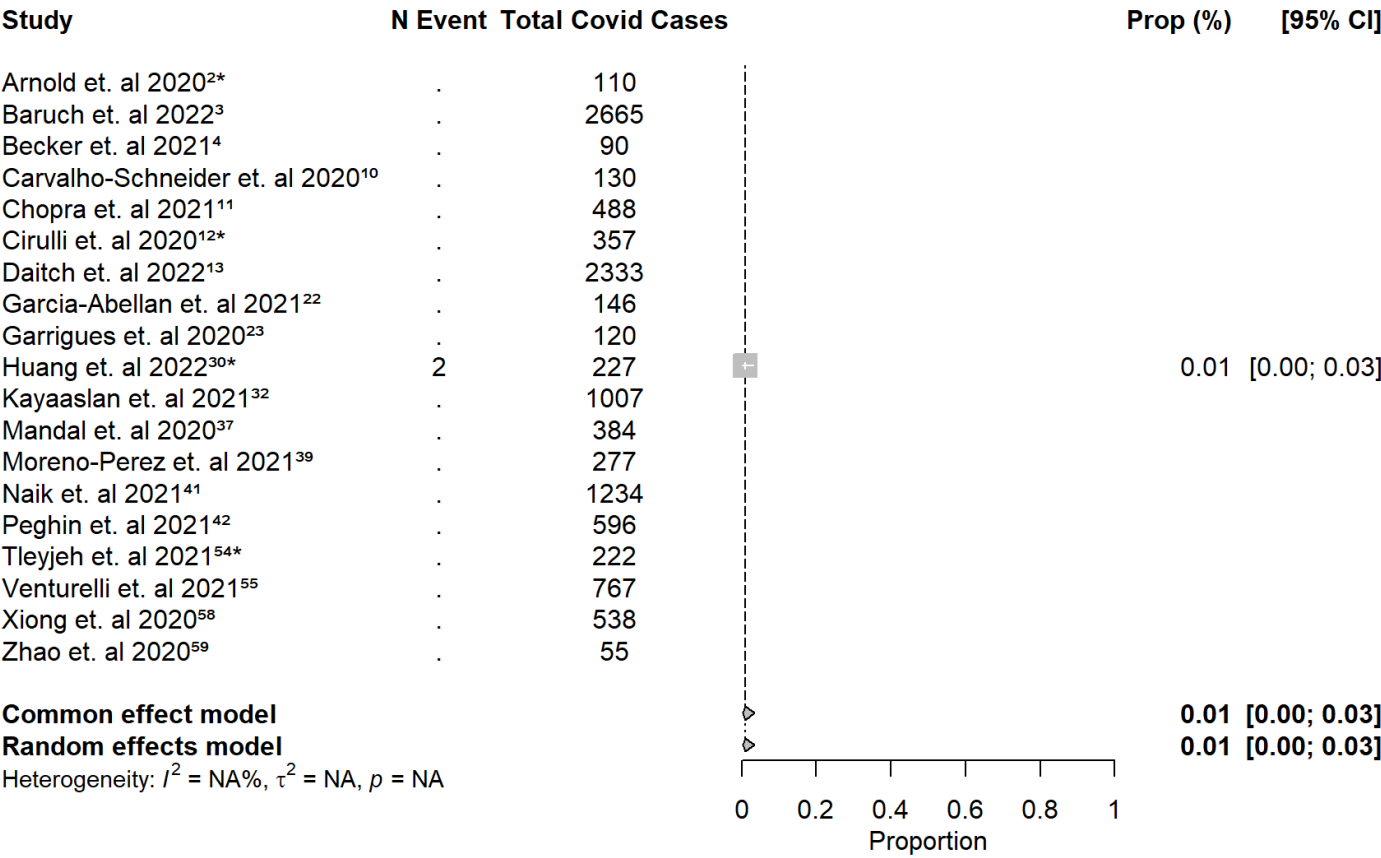

\* indicates value estimated from a figure

Analysis 2

Vision Problems: Risk of Bias Low

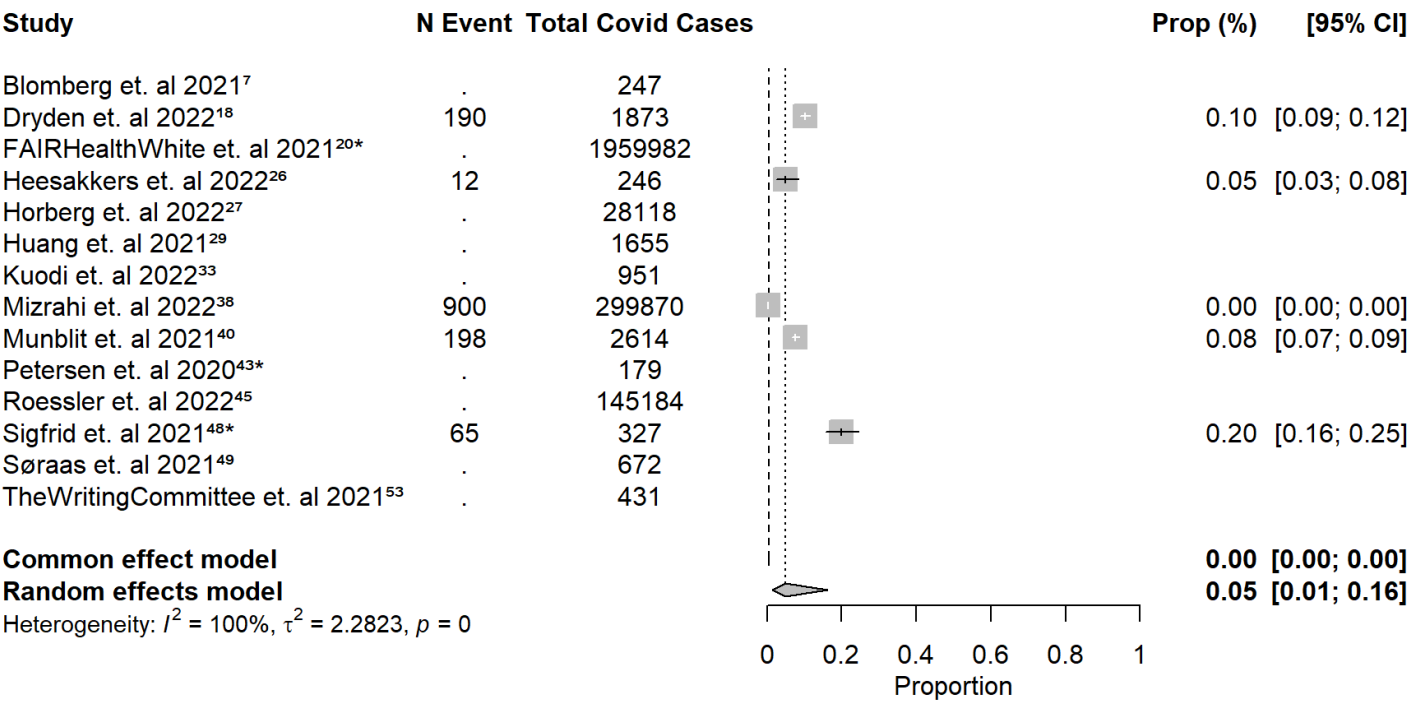

\* indicates value estimated from a figure

# Analysis 3, stratified by Survey, EHR

Fatigue:

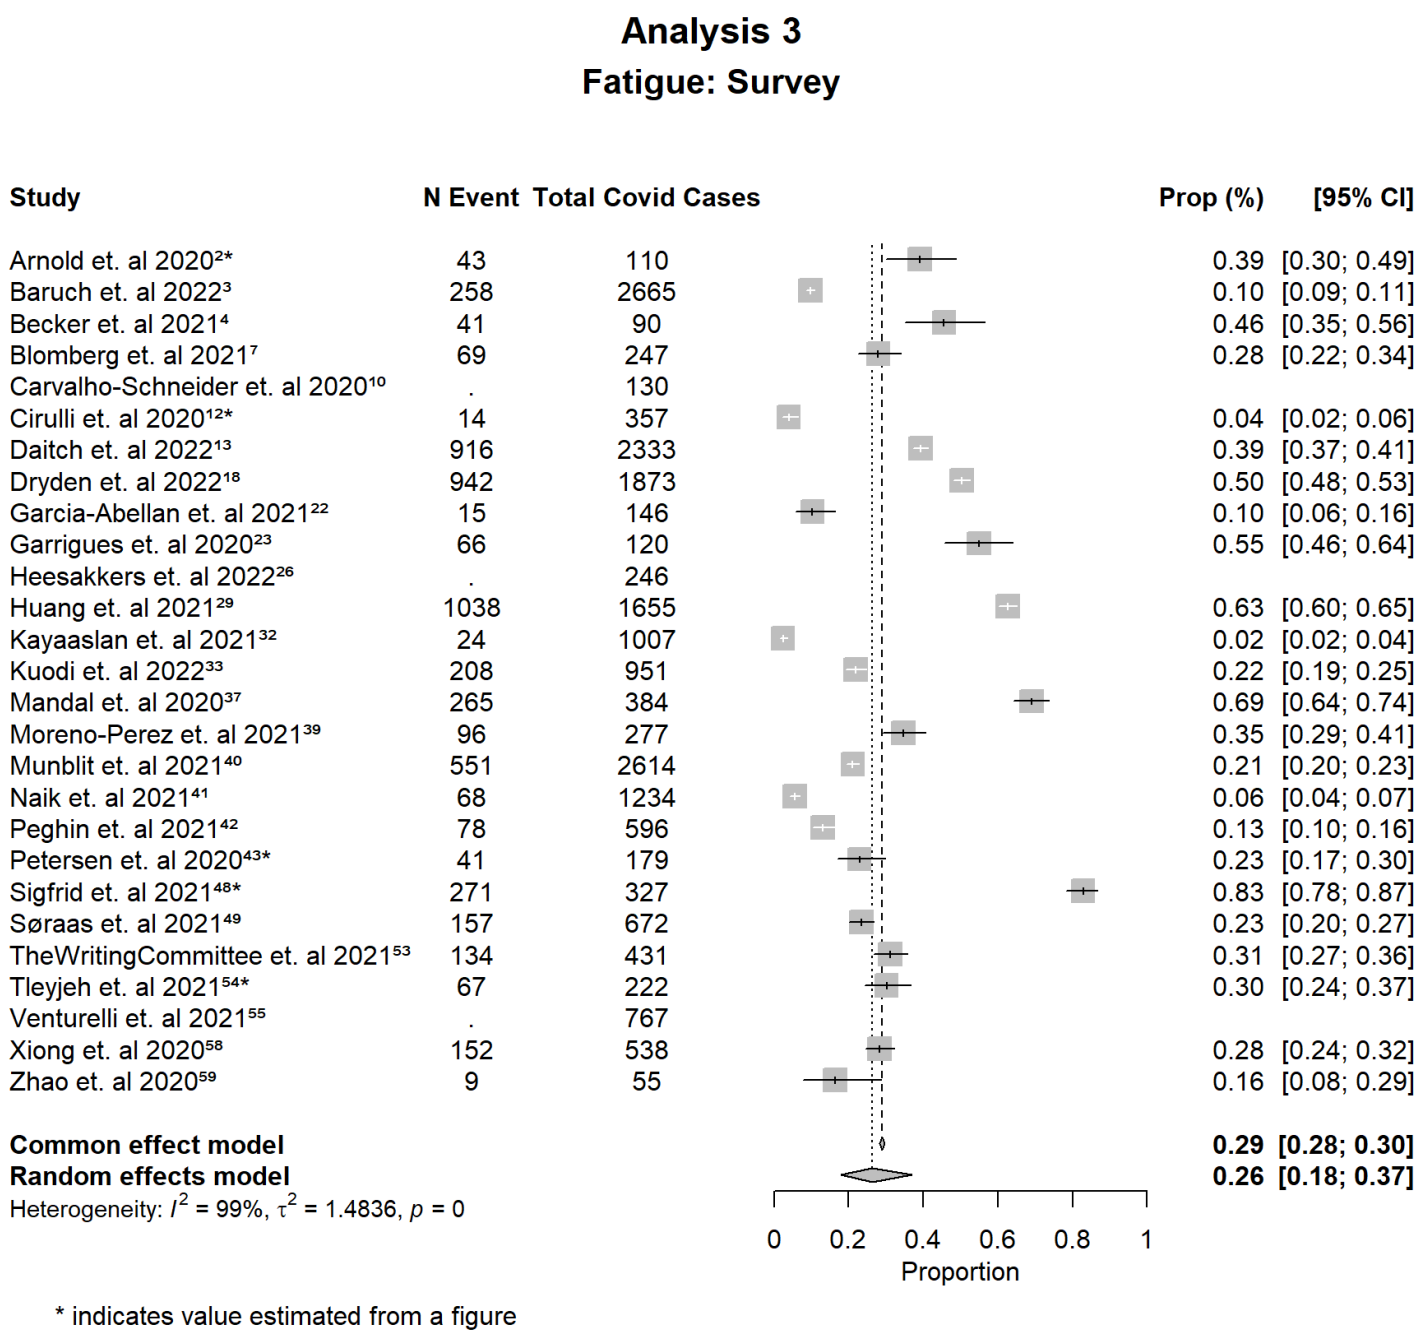

Analysis 3  
Fatigue: EHR



\* indicates value estimated from a figure

# Fever Chills Sweats Or Flushing:

Analysis 3  
Fever Chills Sweats Or Flushing: Survey

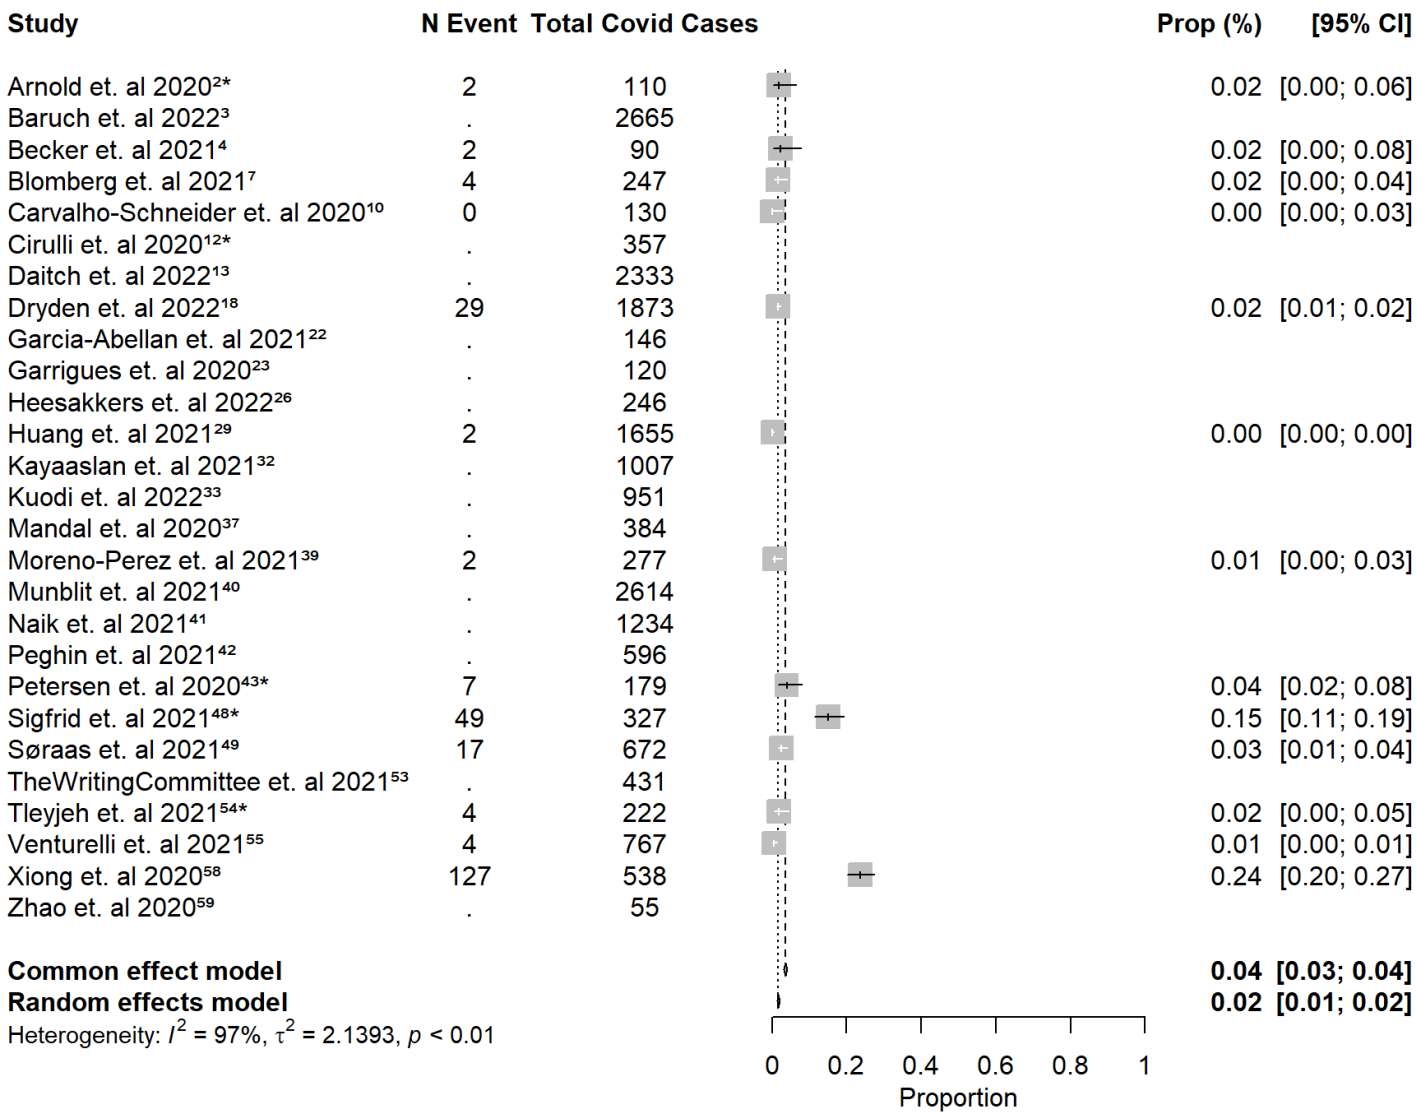

\* indicates value estimated from a figure

Analysis 3  
Fever Chills Sweats Or Flushing: EHR

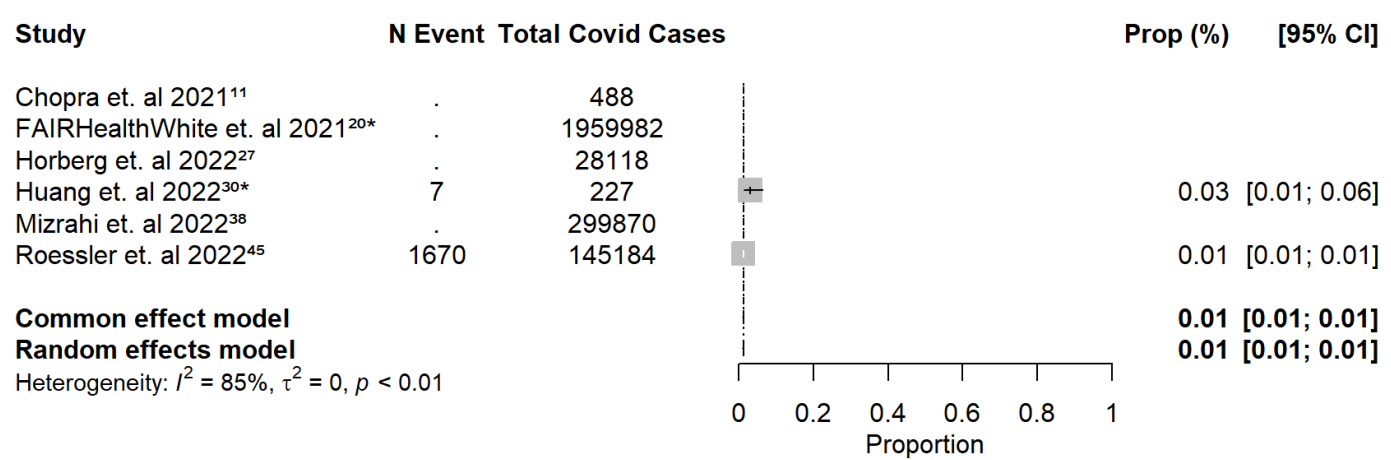

\* indicates value estimated from a figure



Post Exertional Malaise:

Analysis 3  
Post Exertional Malaise: Survey

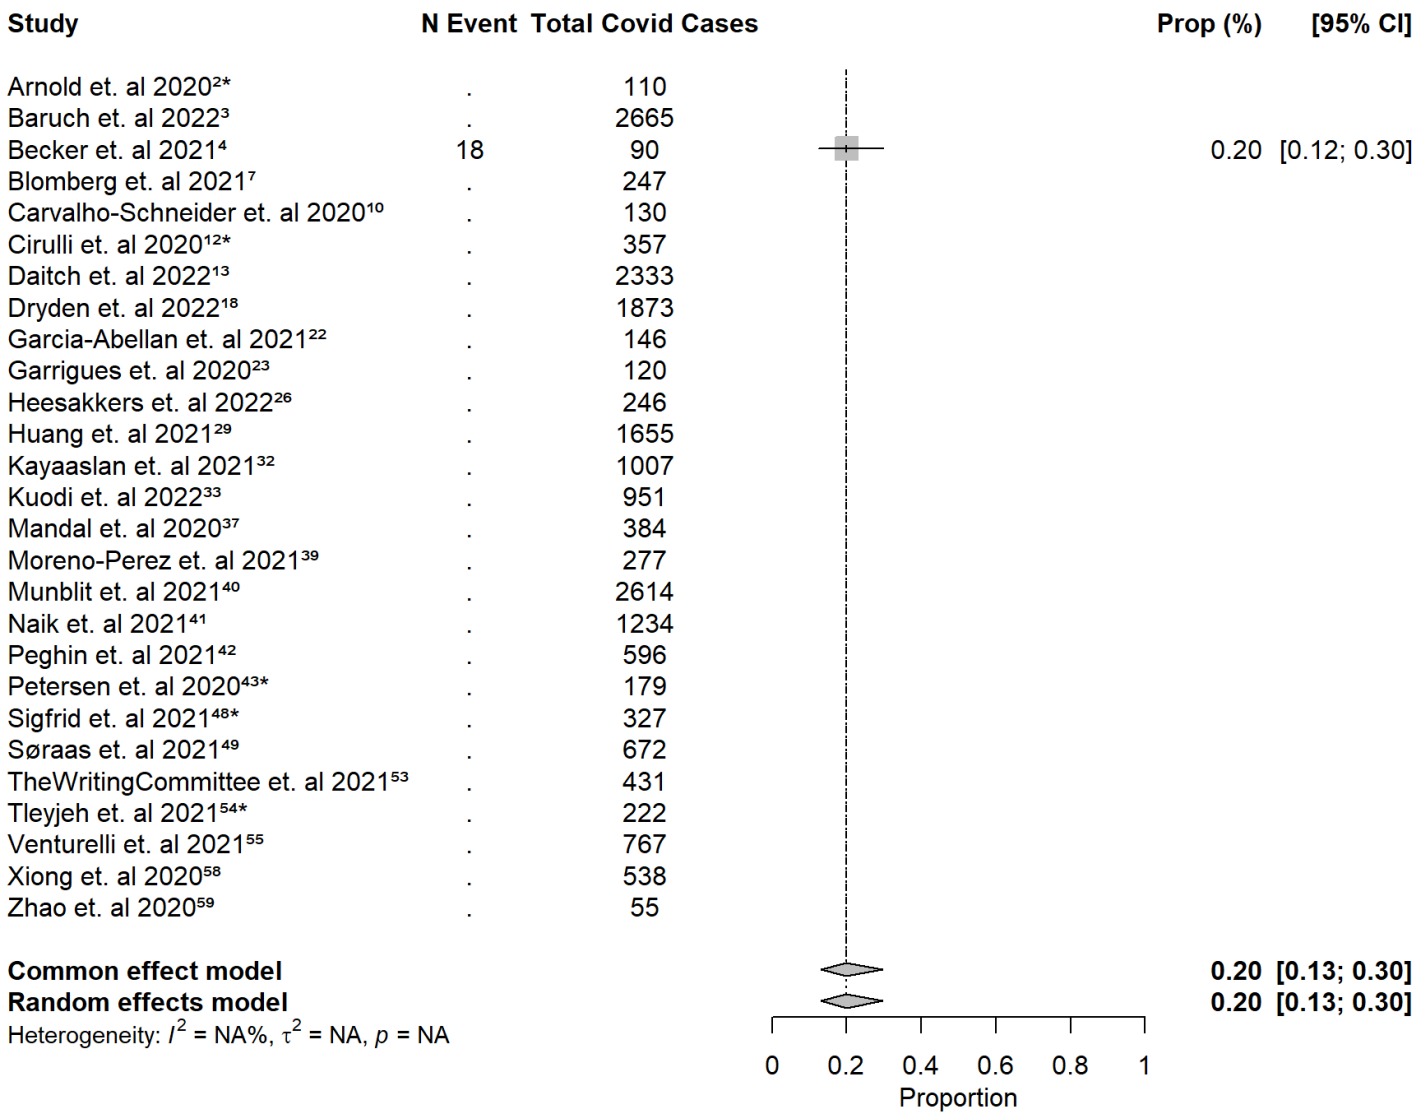

\* indicates value estimated from a figure

# Cardiac Symptoms Including Chest Pain:

## Analysis 3 Cardiac Symptoms Including Chest Pain: Survey

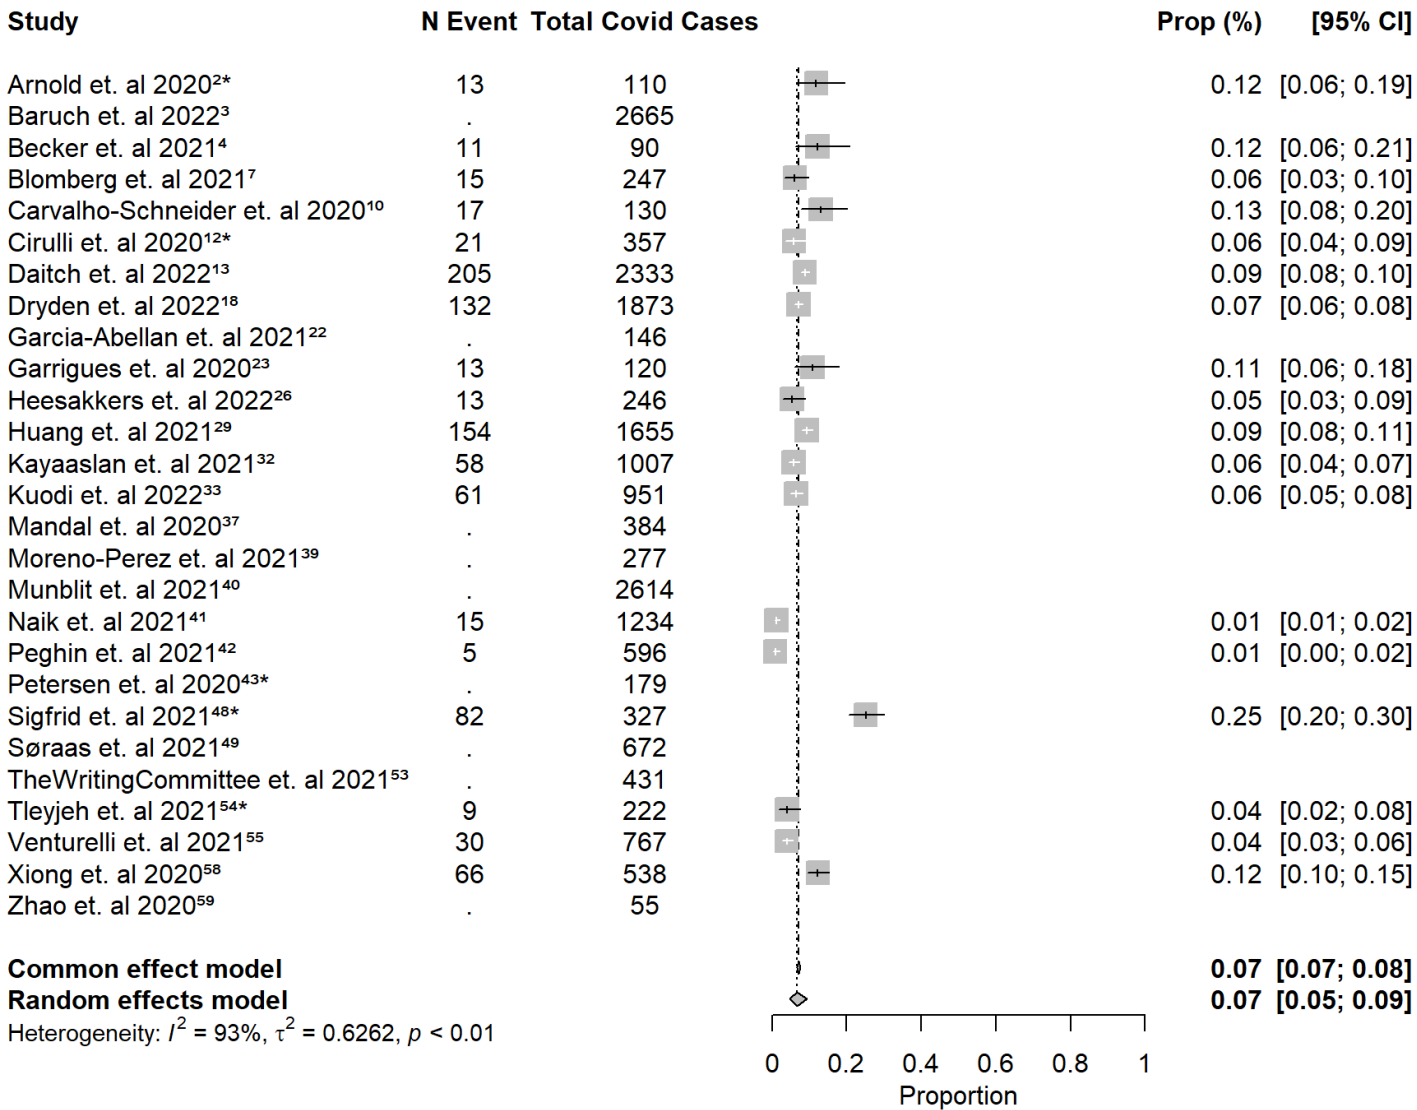

\* indicates value estimated from a figure

Analysis 3  
Cardiac Symptoms Including Chest Pain: EHR



\* indicates value estimated from a figure

Persistent Cough:

Analysis 3  
Persistent Cough: Survey

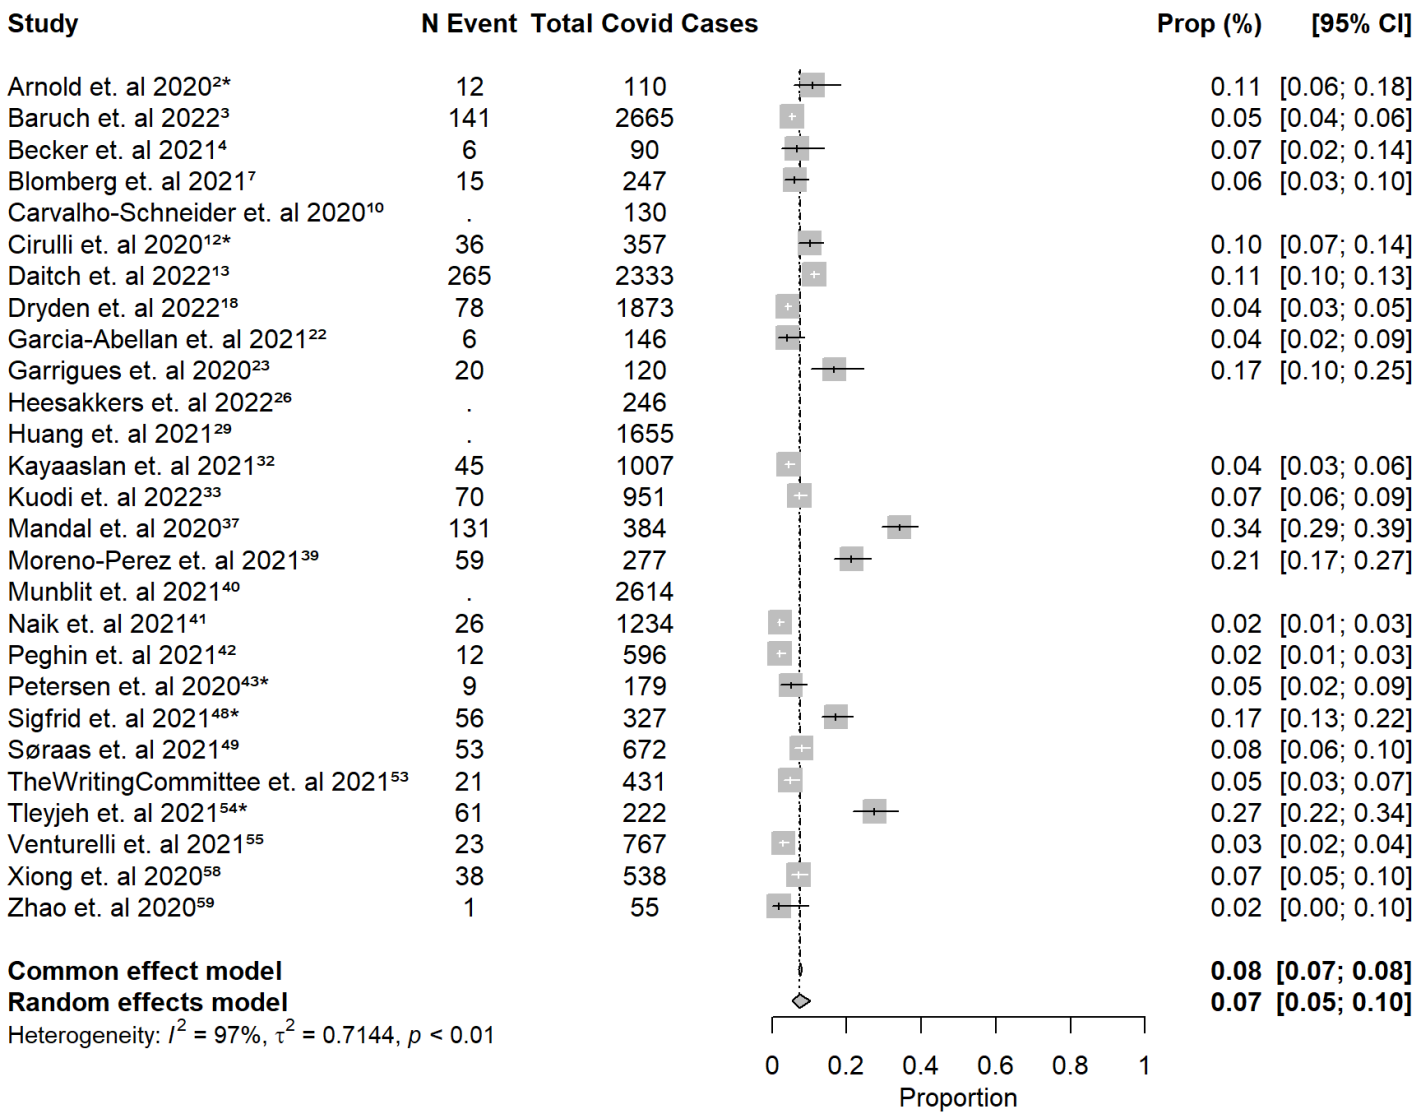

\* indicates value estimated from a figure

Analysis 3  
Persistant Cough: EHR



\* indicates value estimated from a figure

# Shortness Of Breath:

## Analysis 3 Shortness Of Breath: Survey

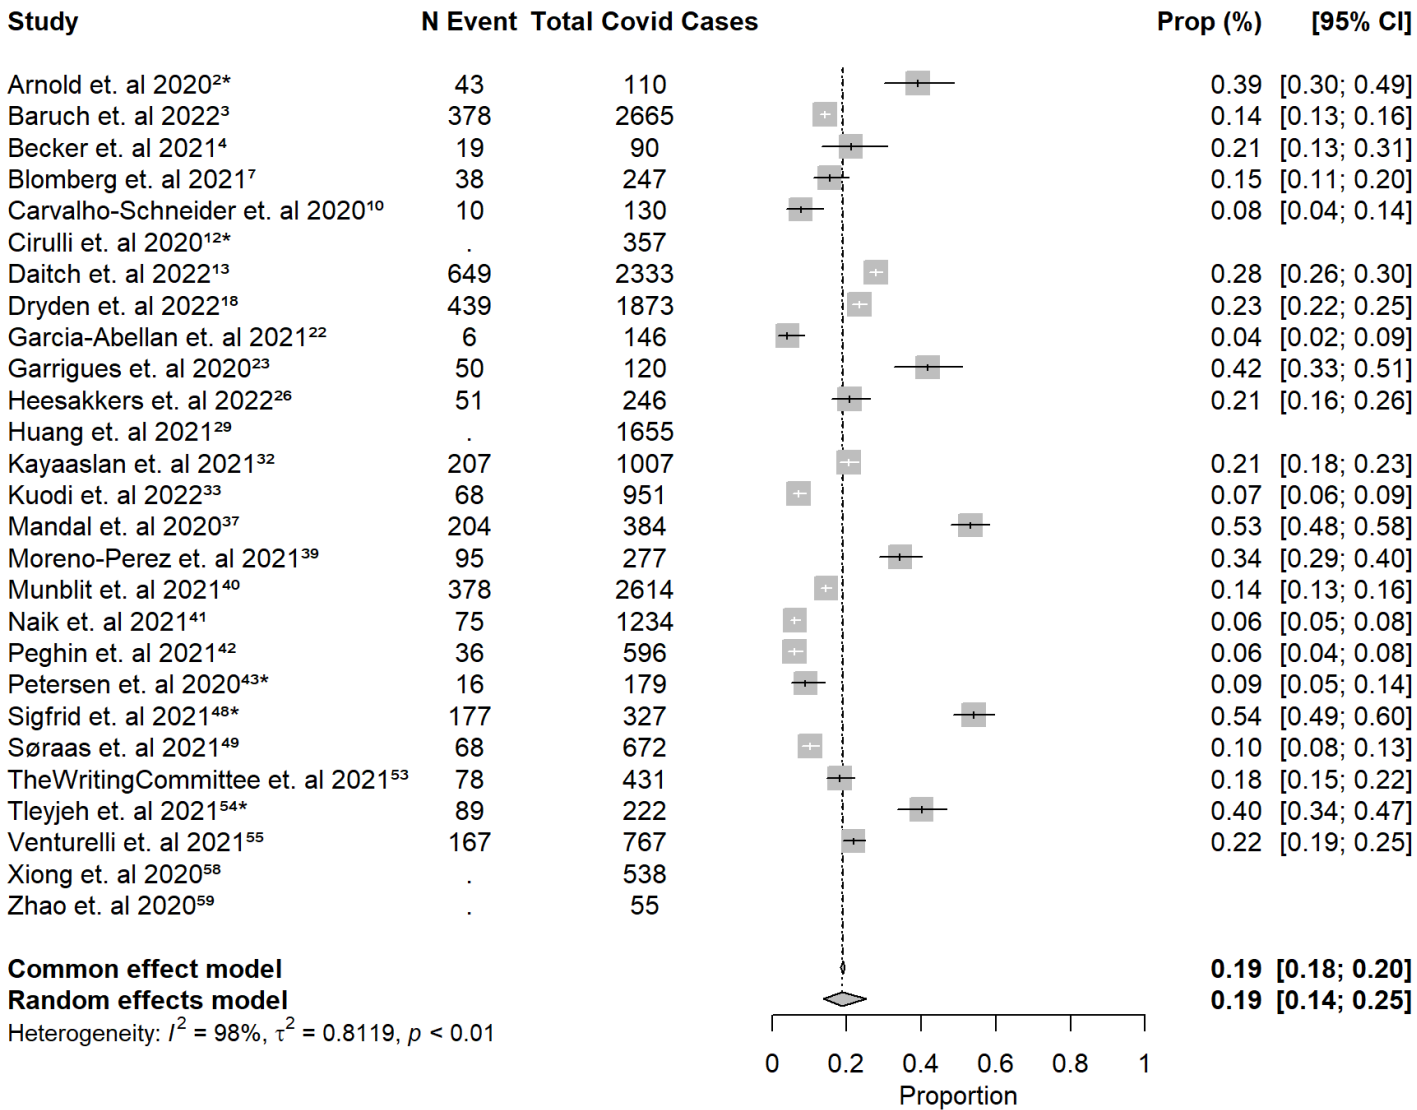

\* indicates value estimated from a figure

Analysis 3  
Shortness Of Breath: EHR

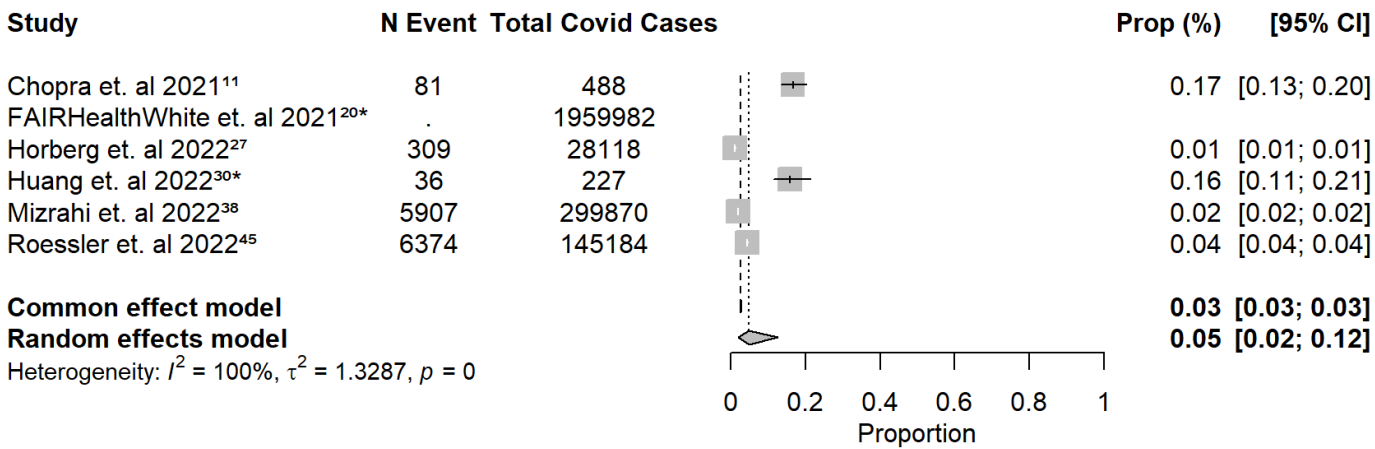

\* indicates value estimated from a figure

Sleep Problems:

Analysis 3  
Sleep Problems: Survey

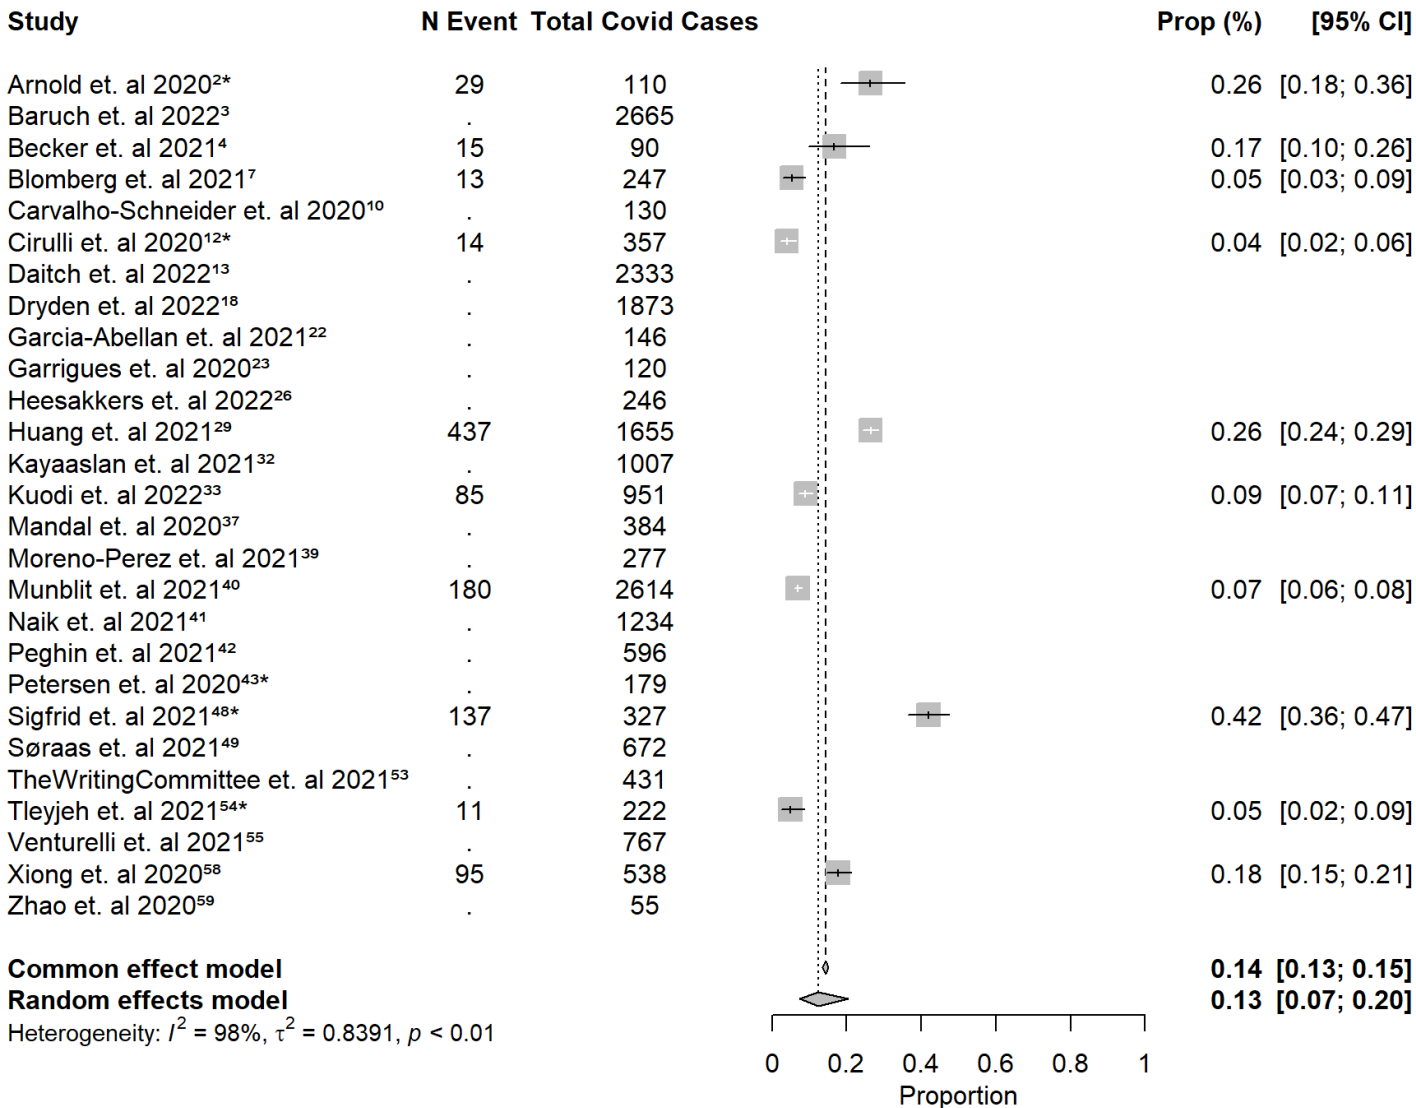

\* indicates value estimated from a figure



Analysis 3  
Sleep Problems: EHR



\* indicates value estimated from a figure

# Problems Thinking Or Concentrating:

Analysis 3  
Problems Thinking Or Concentrating: Survey

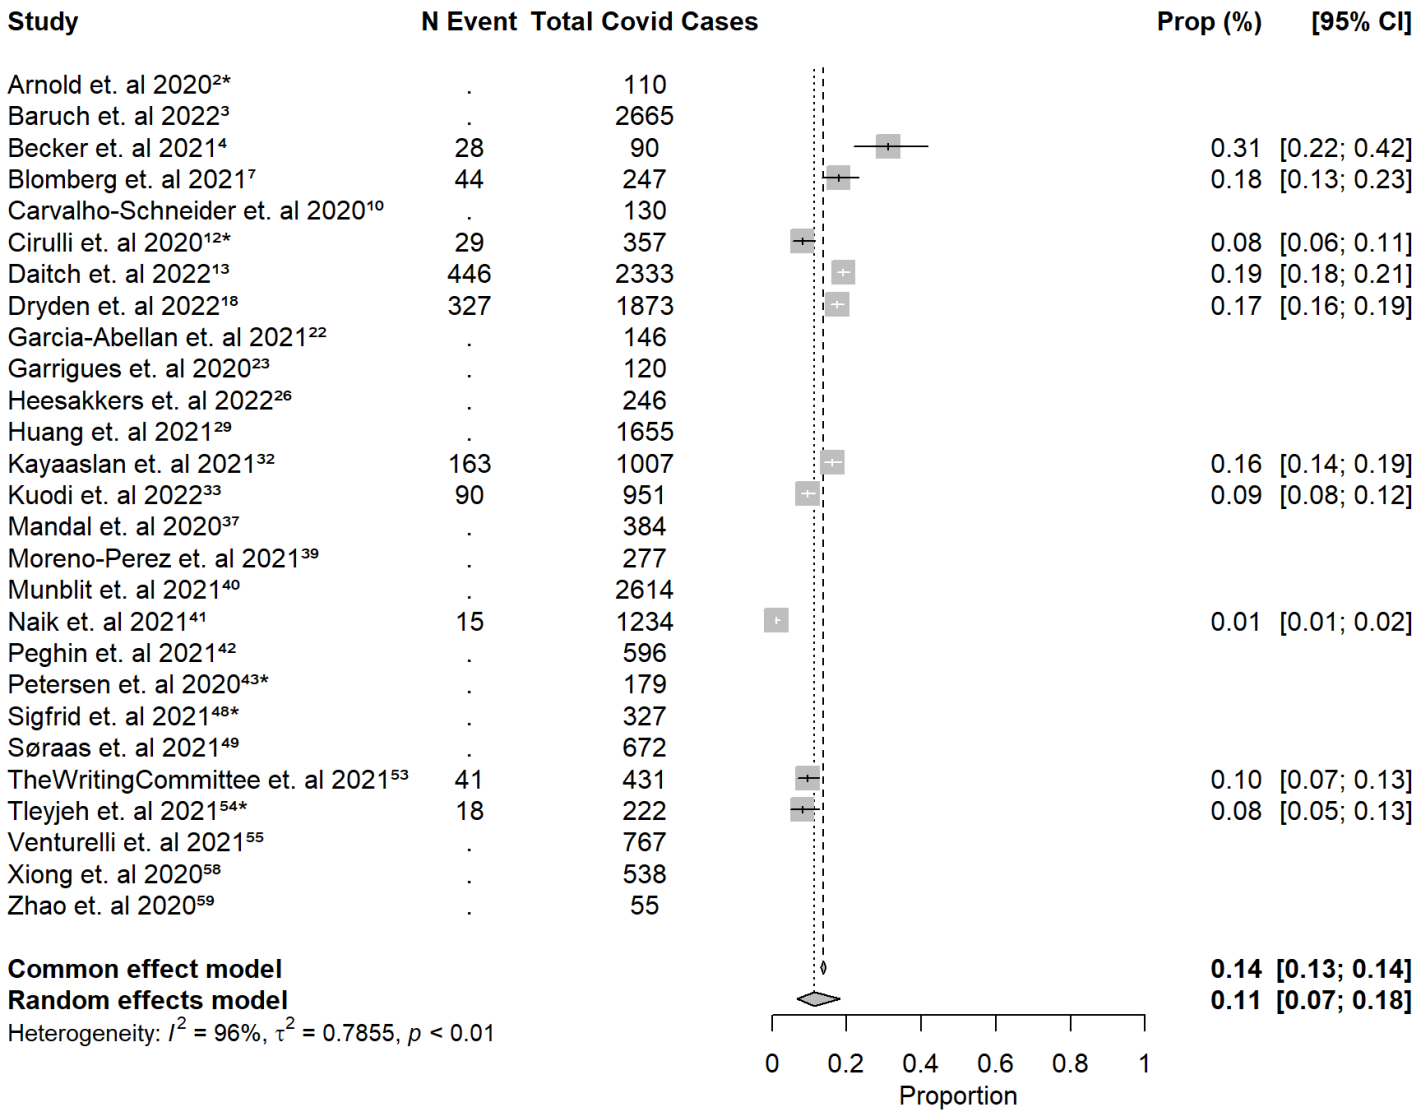

\* indicates value estimated from a figure

Analysis 3  
Problems Thinking Or Concentrating: EHR

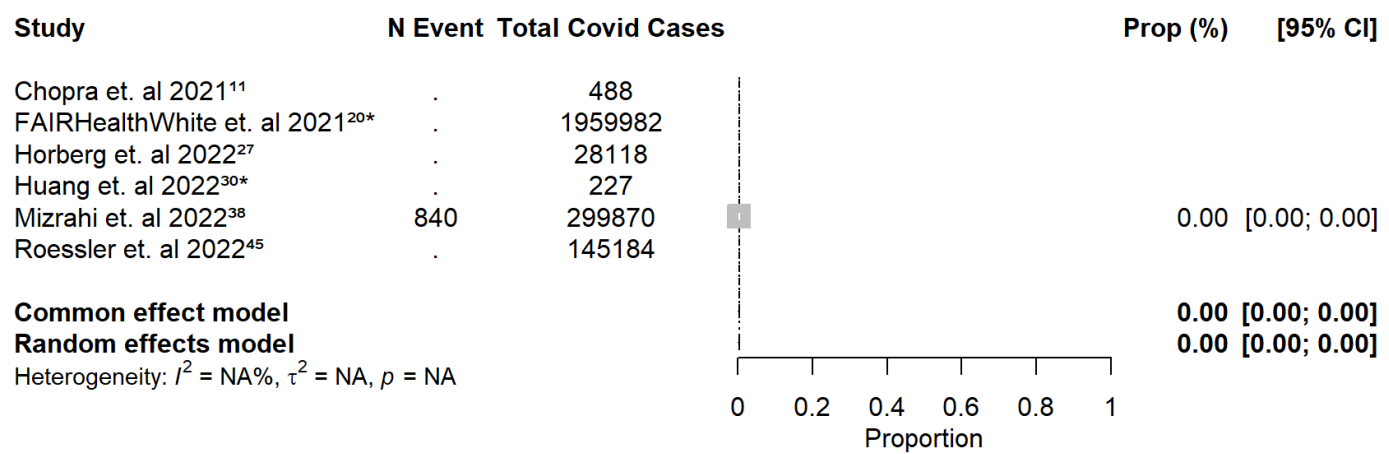

\* indicates value estimated from a figure

Dizziness:

Analysis 3  
Dizziness: Survey

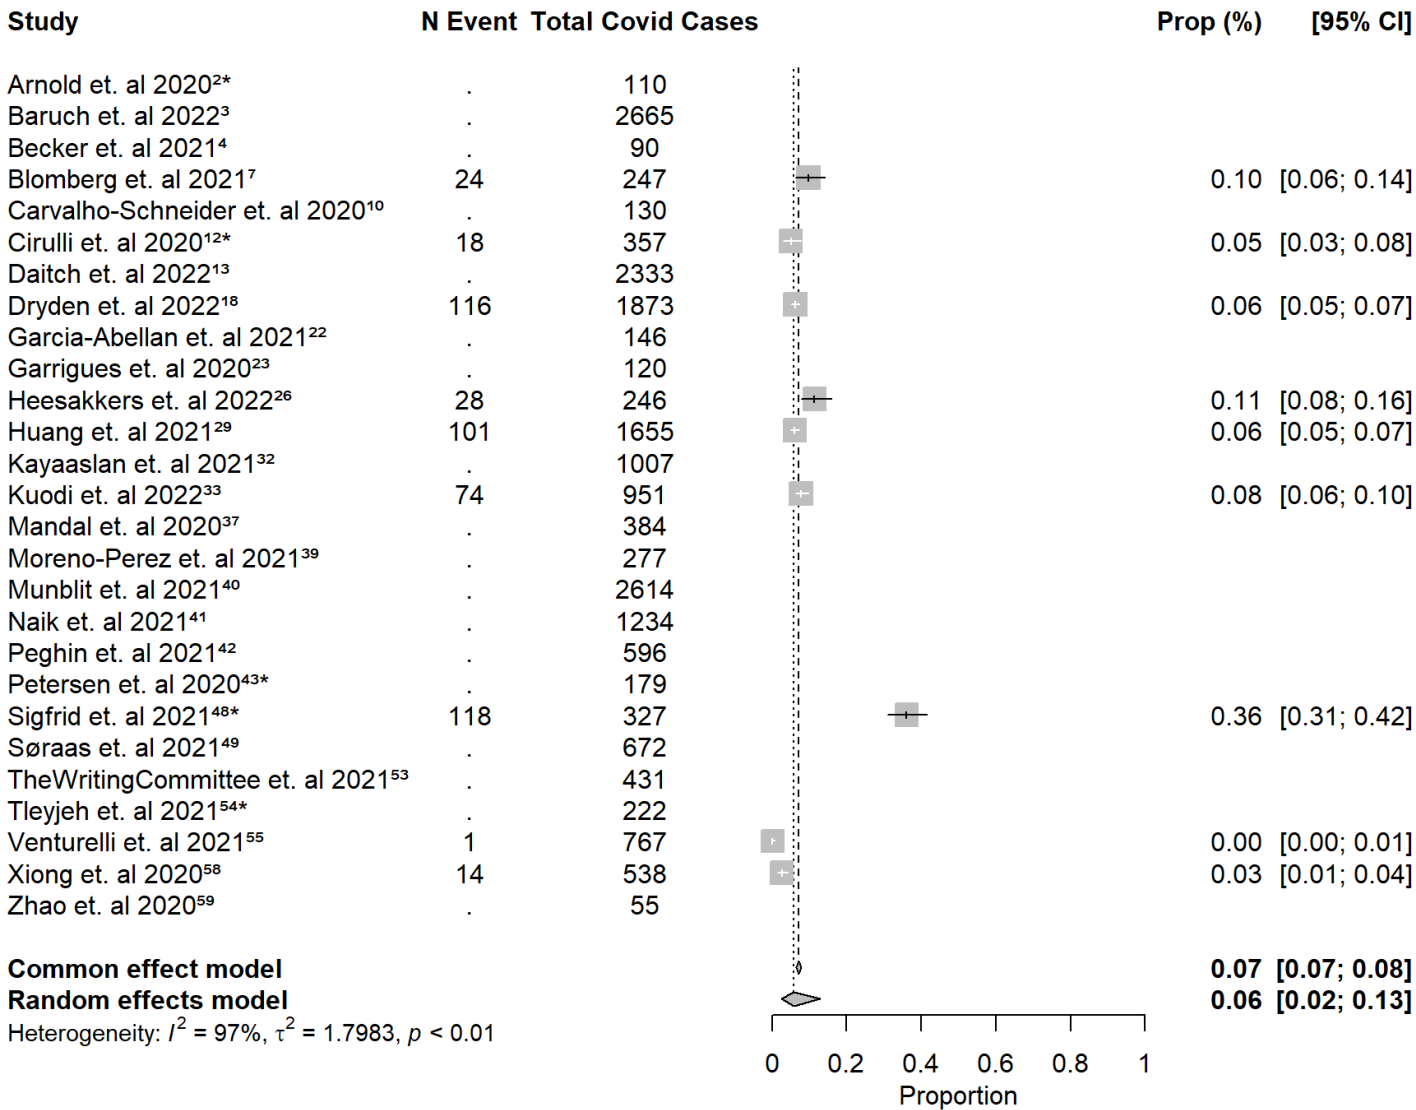

\* indicates value estimated from a figure

Analysis 3  
Dizziness: EHR



\* indicates value estimated from a figure

Headache:

Analysis 3  
Headache: Survey

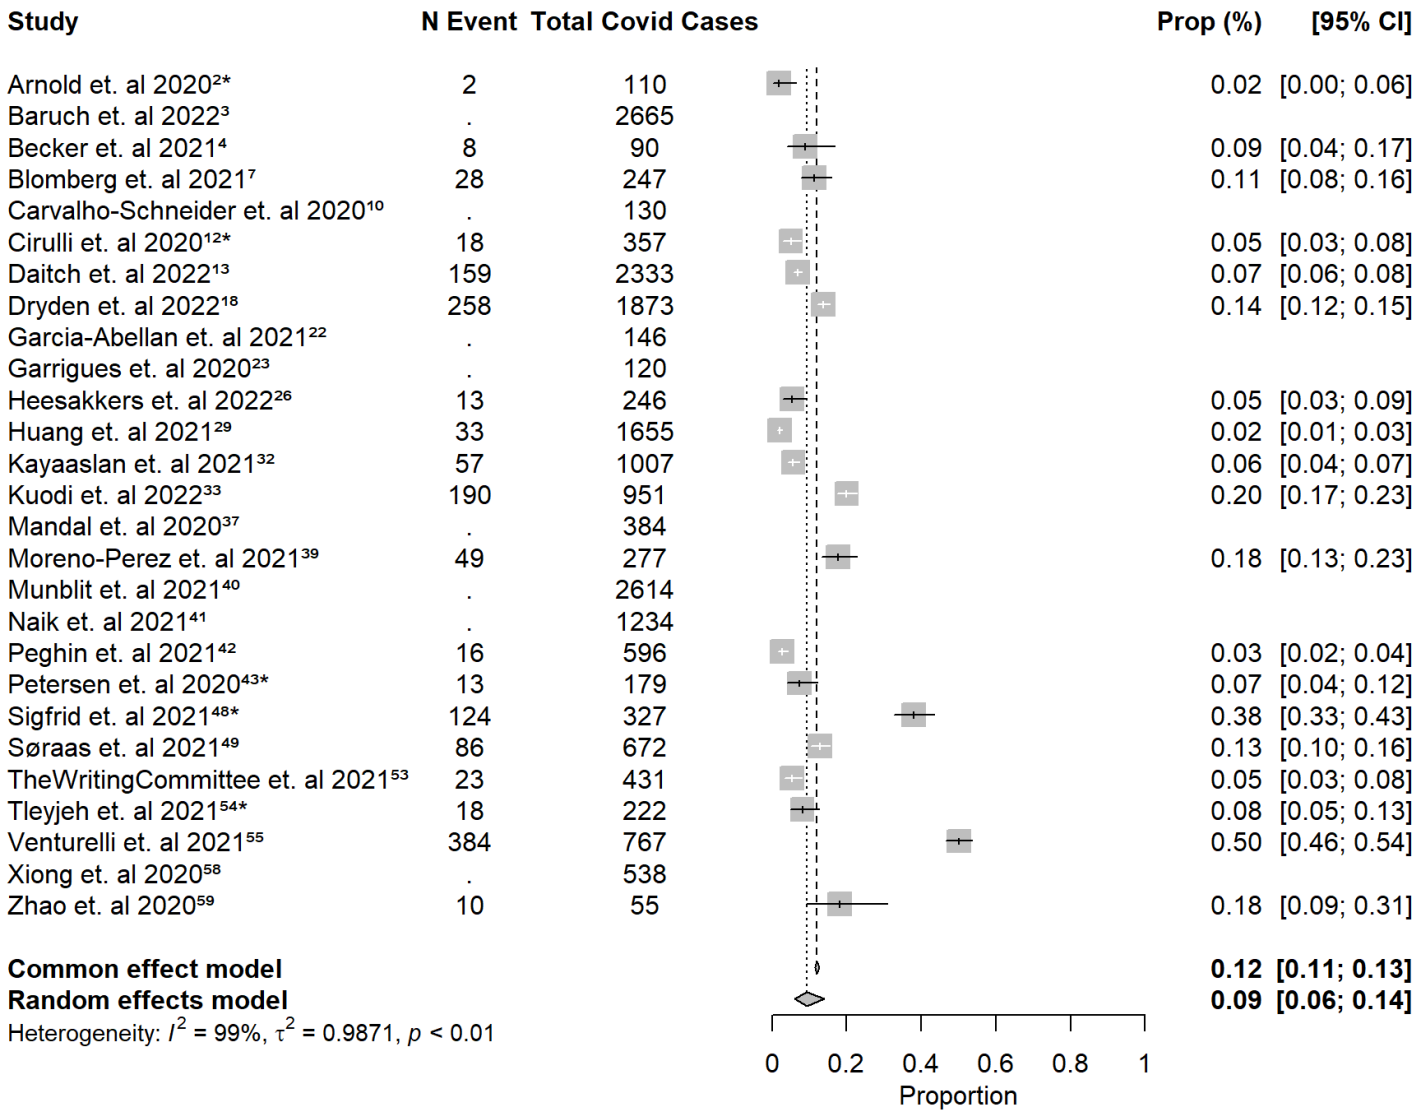

\* indicates value estimated from a figure

Analysis 3  
Headache: EHR

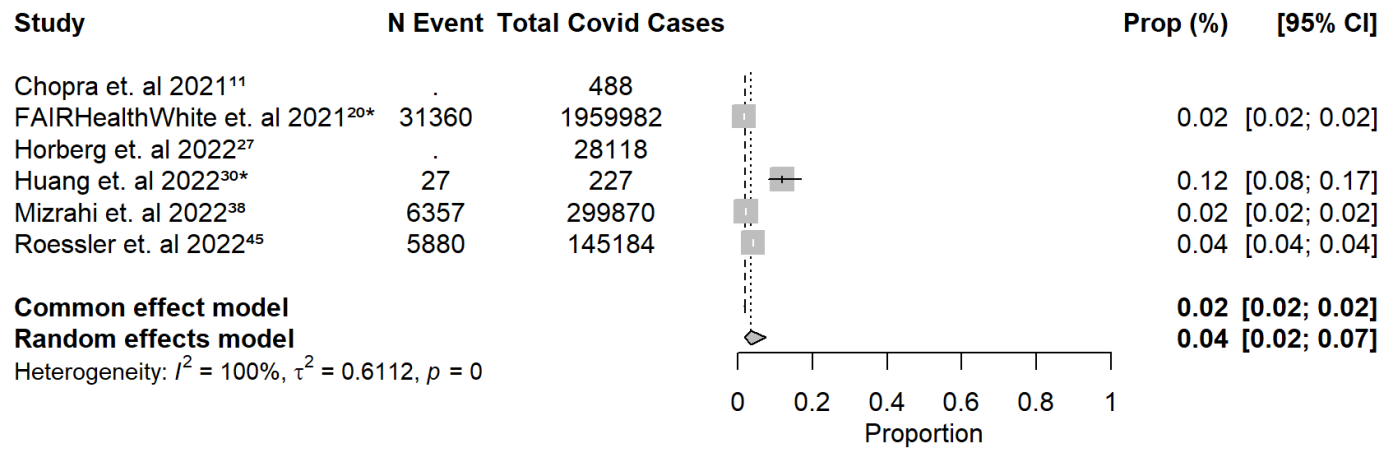

\* indicates value estimated from a figure

# Nerve Problems Seizures:

## Analysis 3 Nerve Problems Seizures: Survey

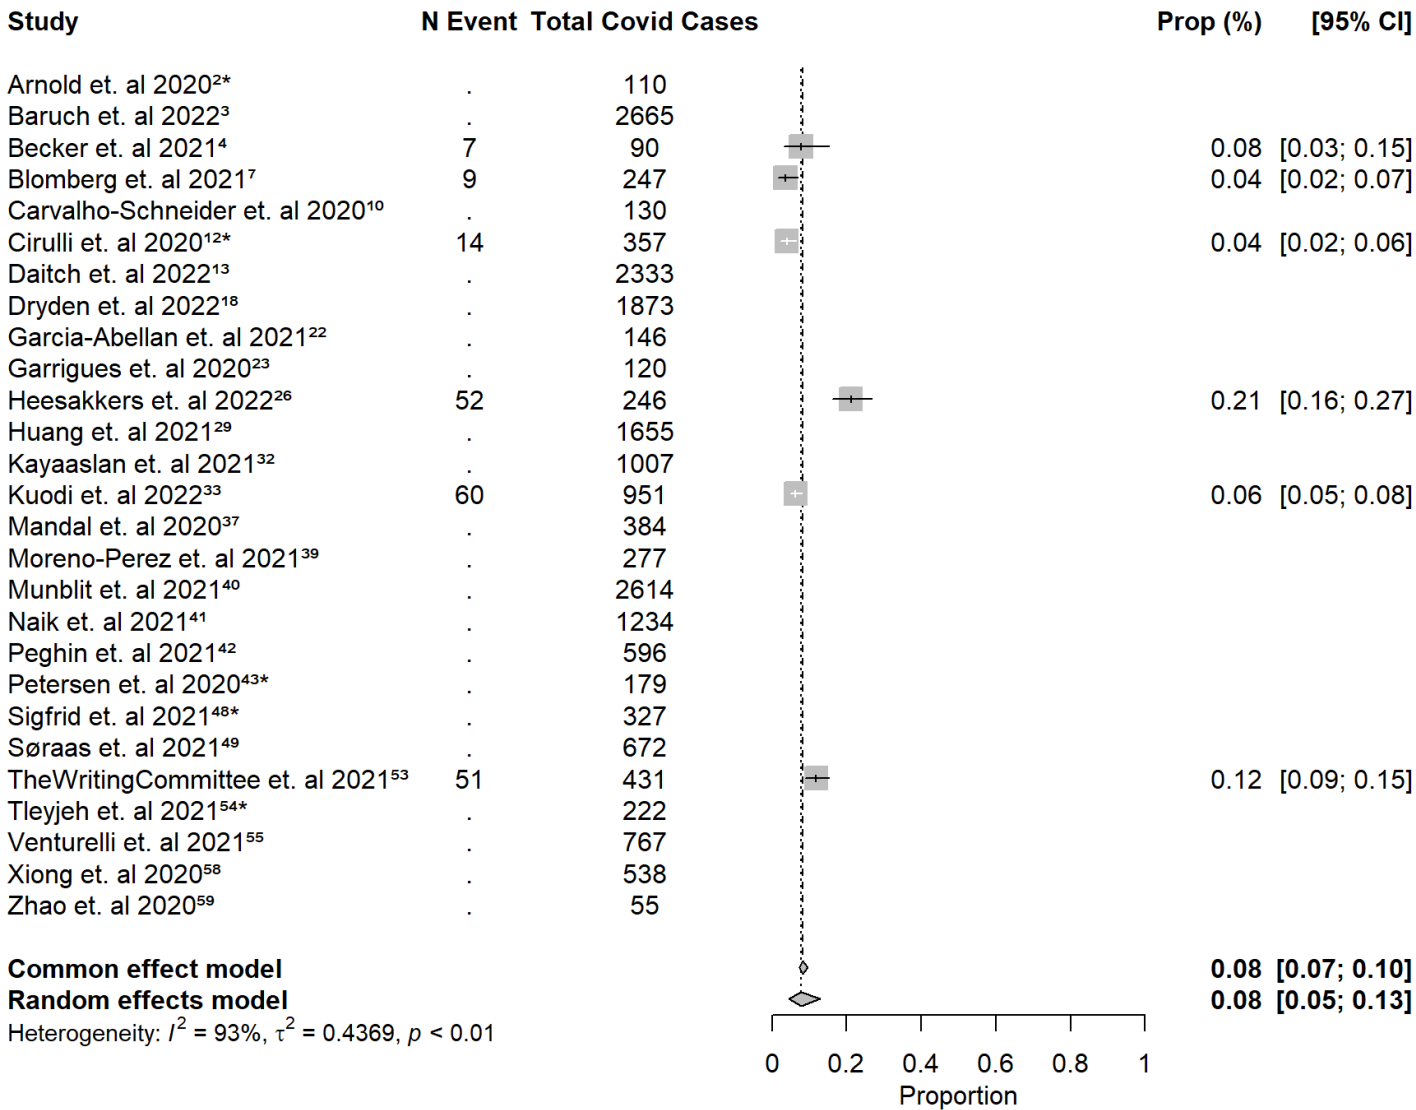

\* indicates value estimated from a figure



Analysis 3  
Nerve Problems Seizures: EHR



\* indicates value estimated from a figure

# Loss Of Or Change In Smell Or Taste:

Analysis 3  
Loss Of Or Change In Smell Or Taste: Survey

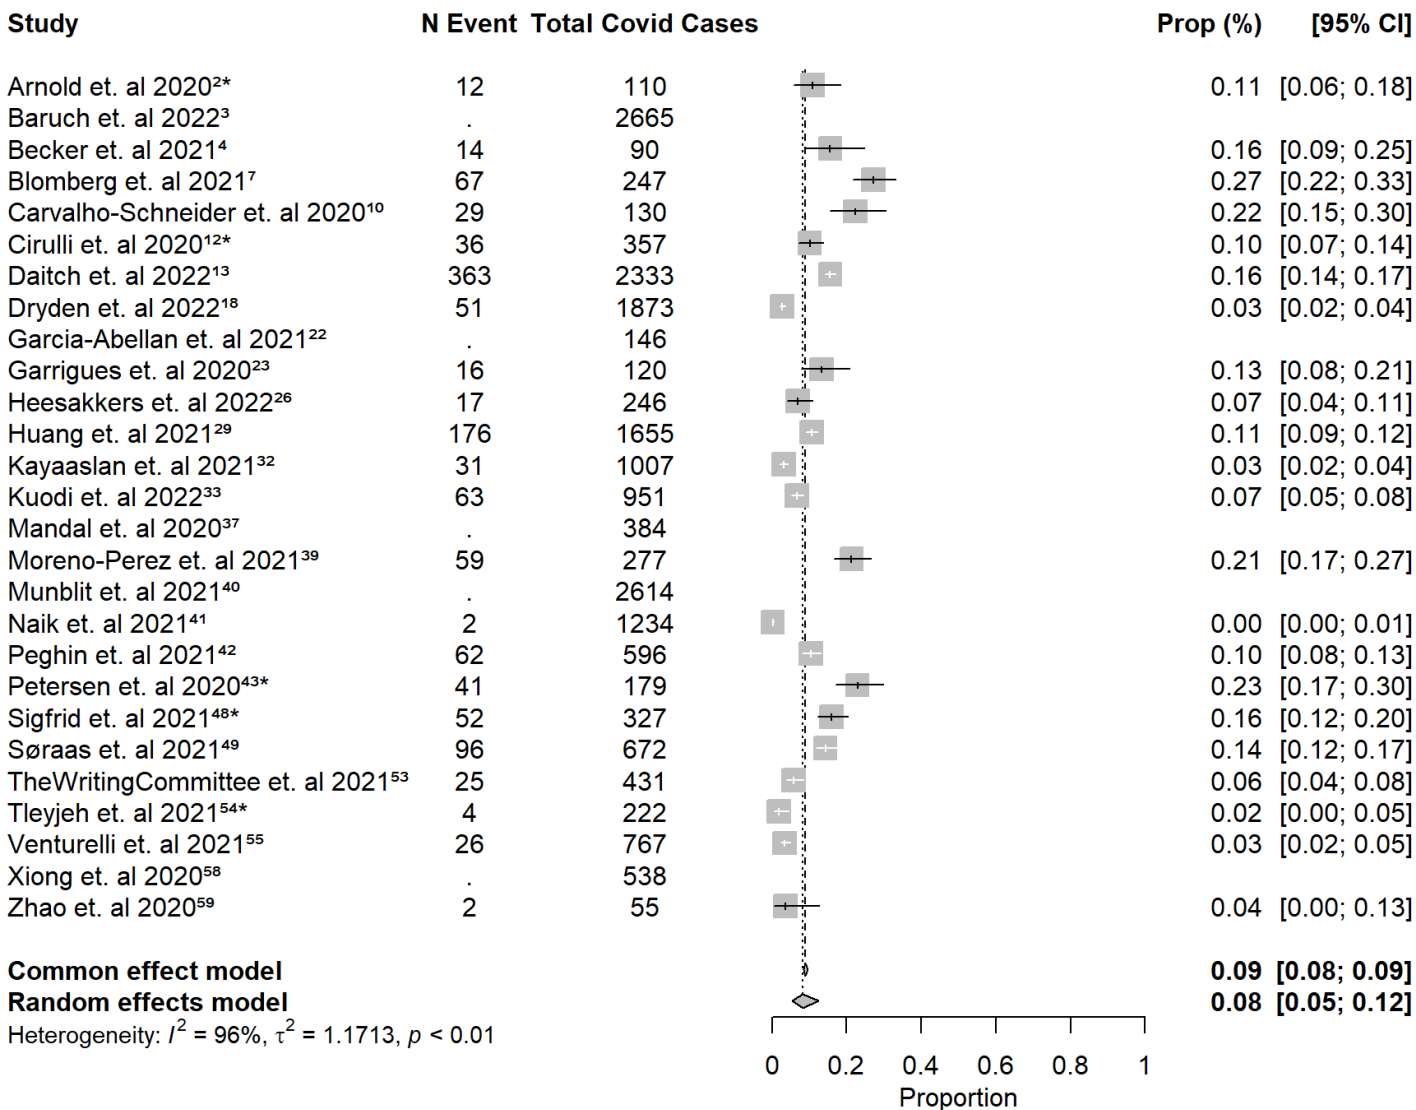

\* indicates value estimated from a figure

Analysis 3  
Loss Of Or Change In Smell Or Taste: EHR



\* indicates value estimated from a figure

# Mental Health Concerns:

## Analysis 3 Mental Health Concerns: Survey

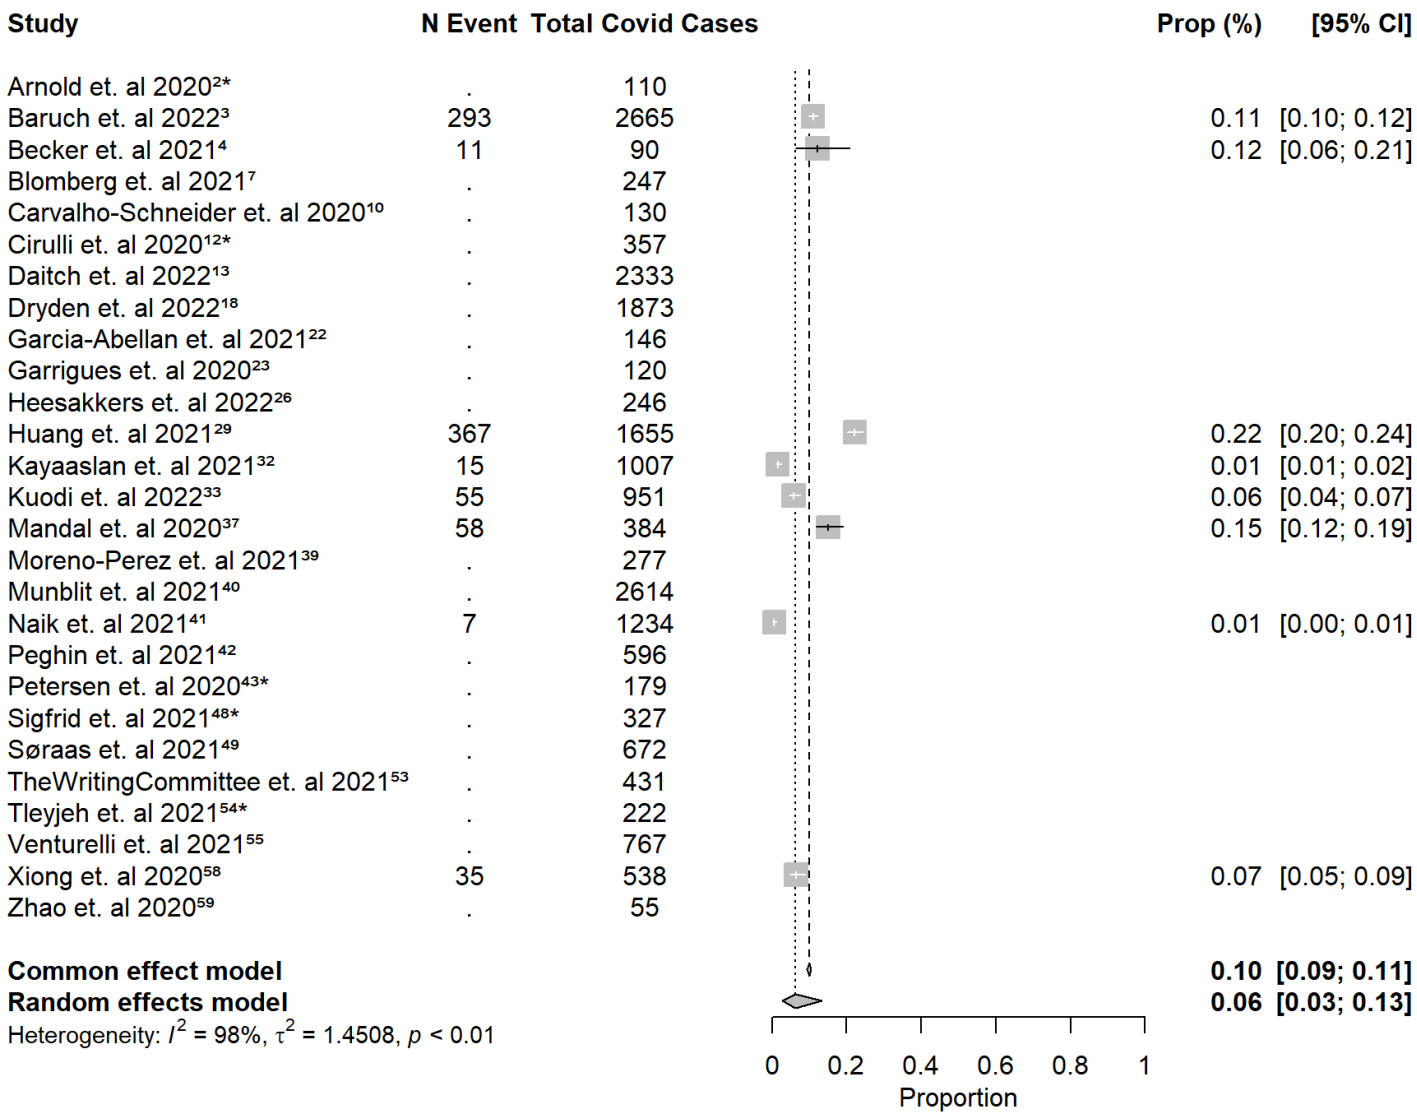

\* indicates value estimated from a figure

Analysis 3  
Mental Health Concerns: EHR



\* indicates value estimated from a figure

Joint Muscle Pain:

Analysis 3  
Joint Muscle Pain: Survey

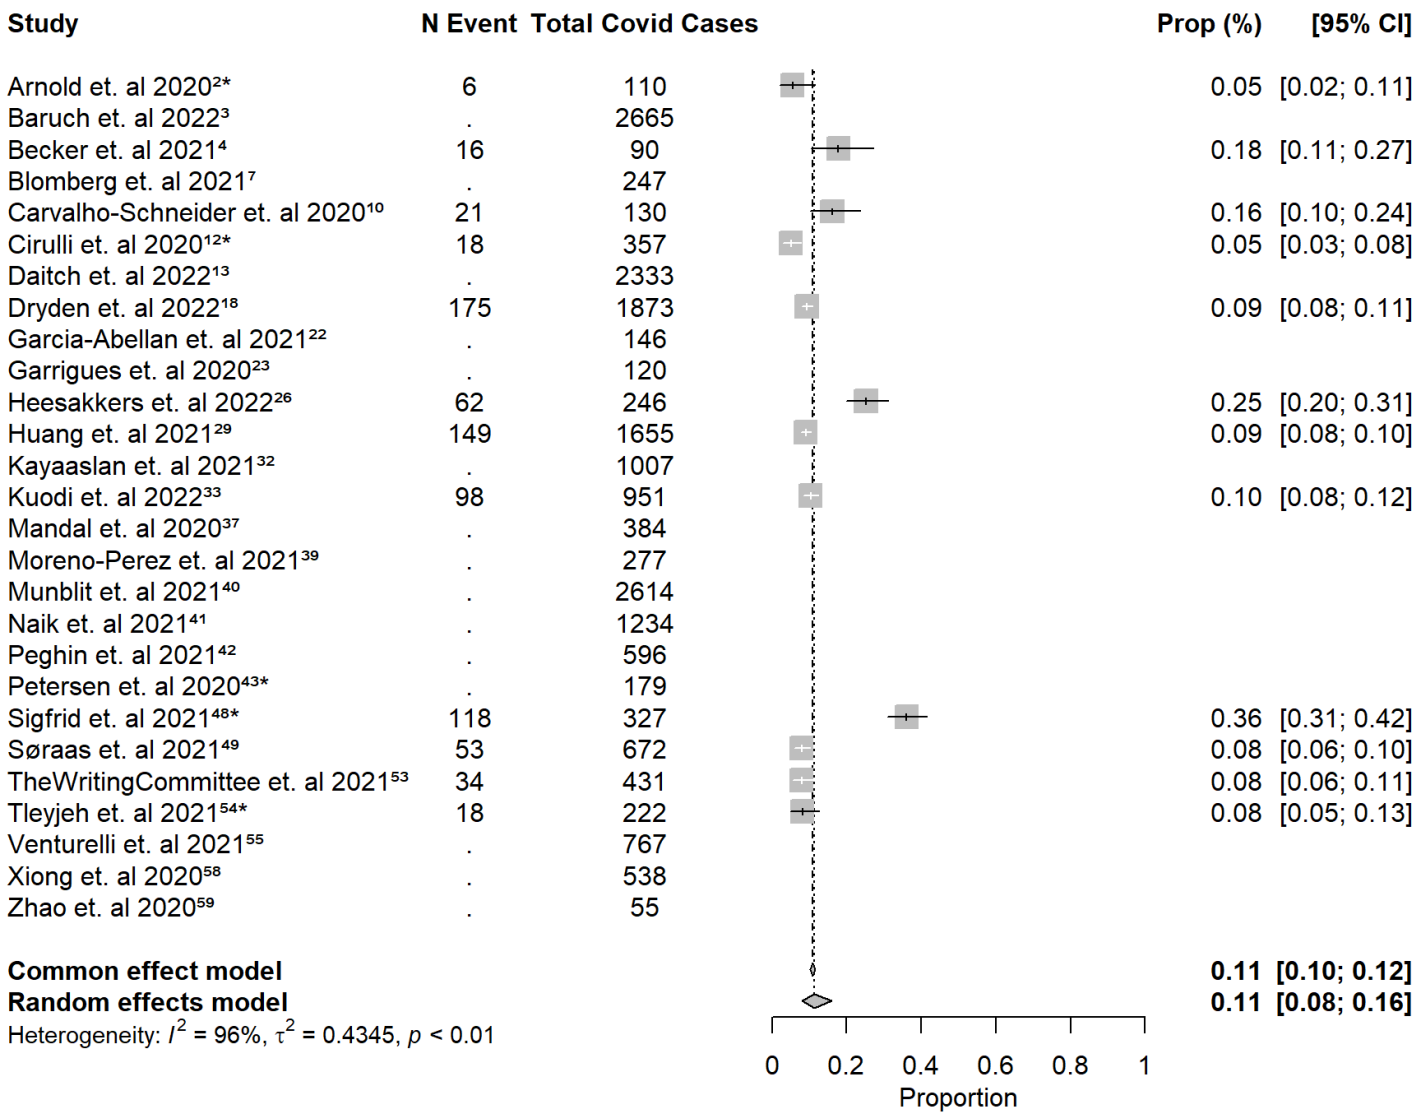

\* indicates value estimated from a figure

Analysis 3  
Joint Muscle Pain: EHR



\* indicates value estimated from a figure

# Weakness In Arms Or Legs:

## Analysis 3 Weakness In Arms Or Legs: Survey

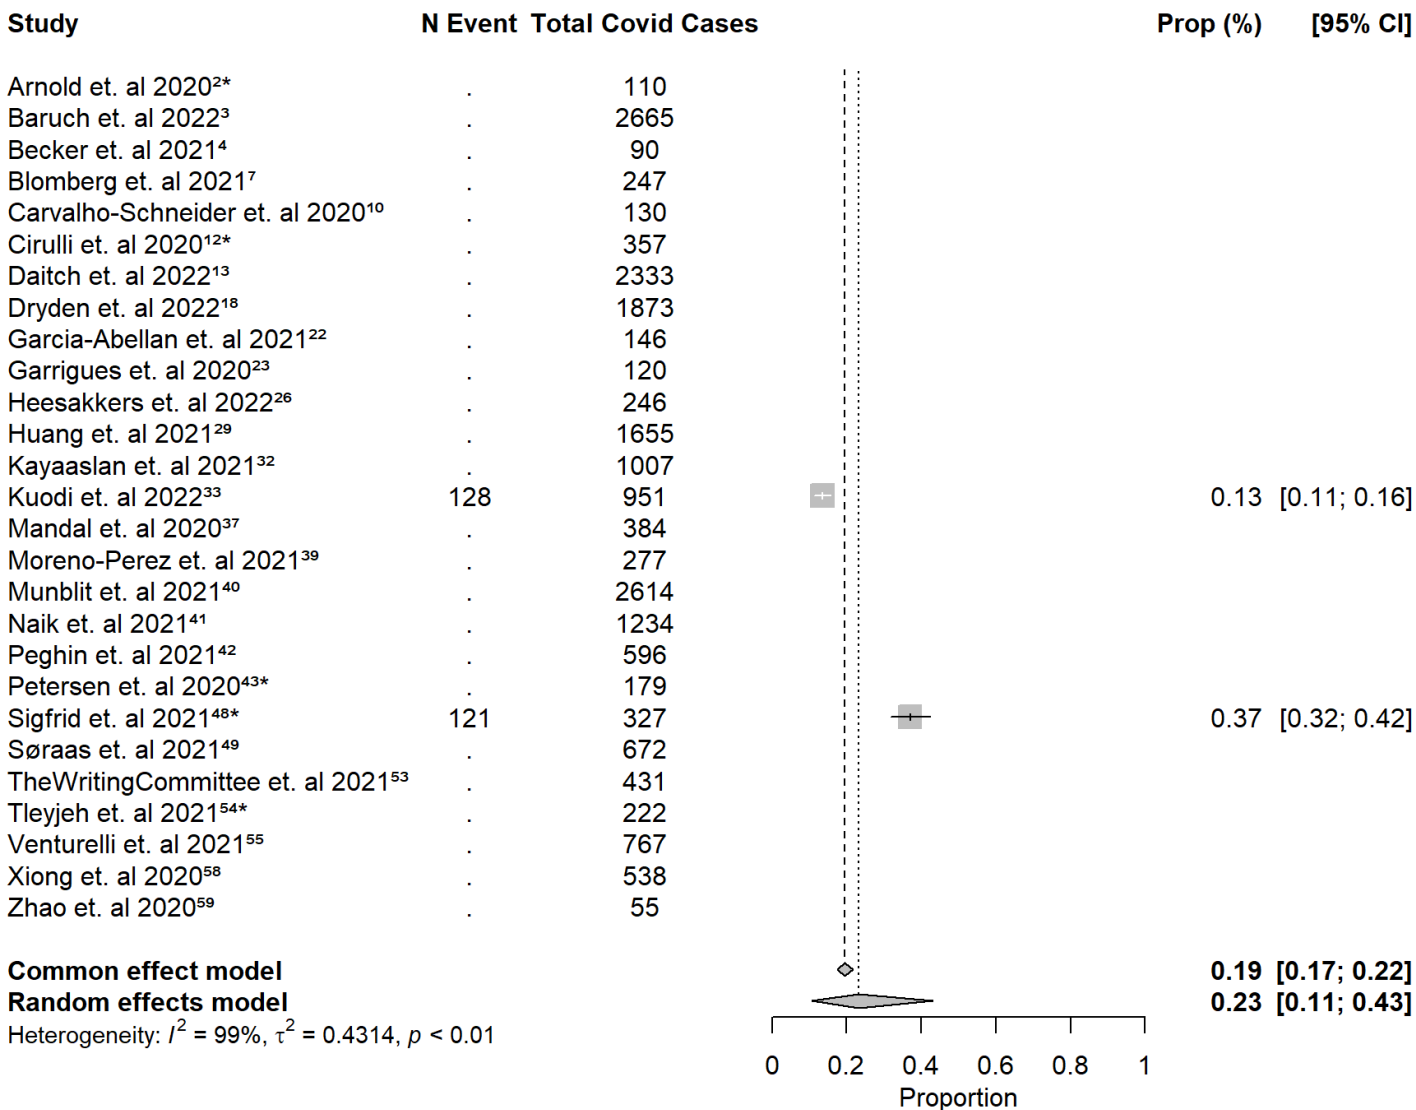

\* indicates value estimated from a figure



Analysis 3  
Weakness In Arms Or Legs: EHR

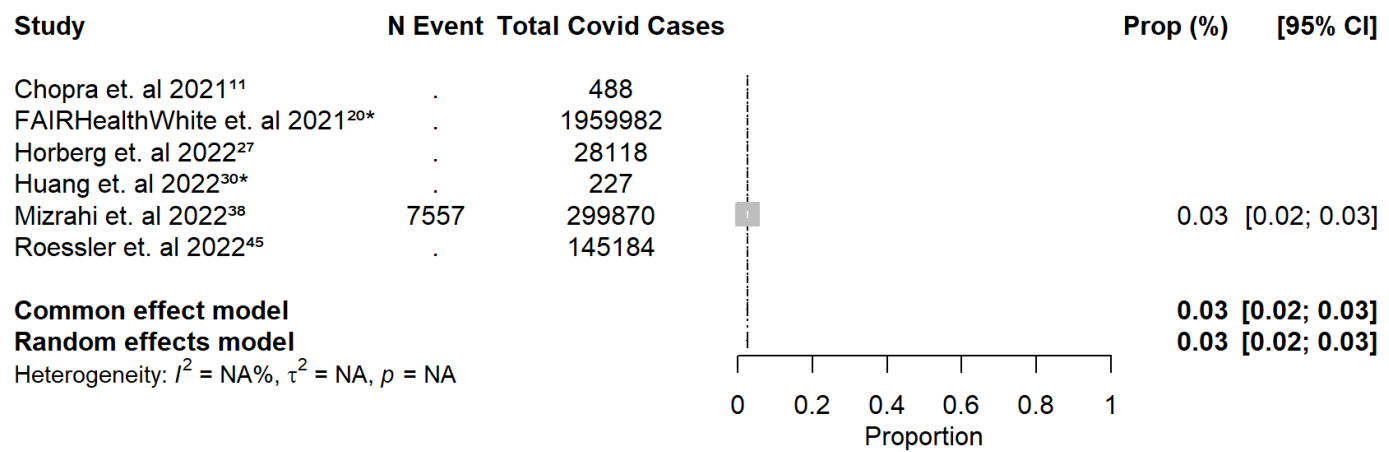

\* indicates value estimated from a figure

# Gi Symptoms Including Abdominal Pain:

Analysis 3  
Gi Symptoms Including Abdominal Pain: Survey

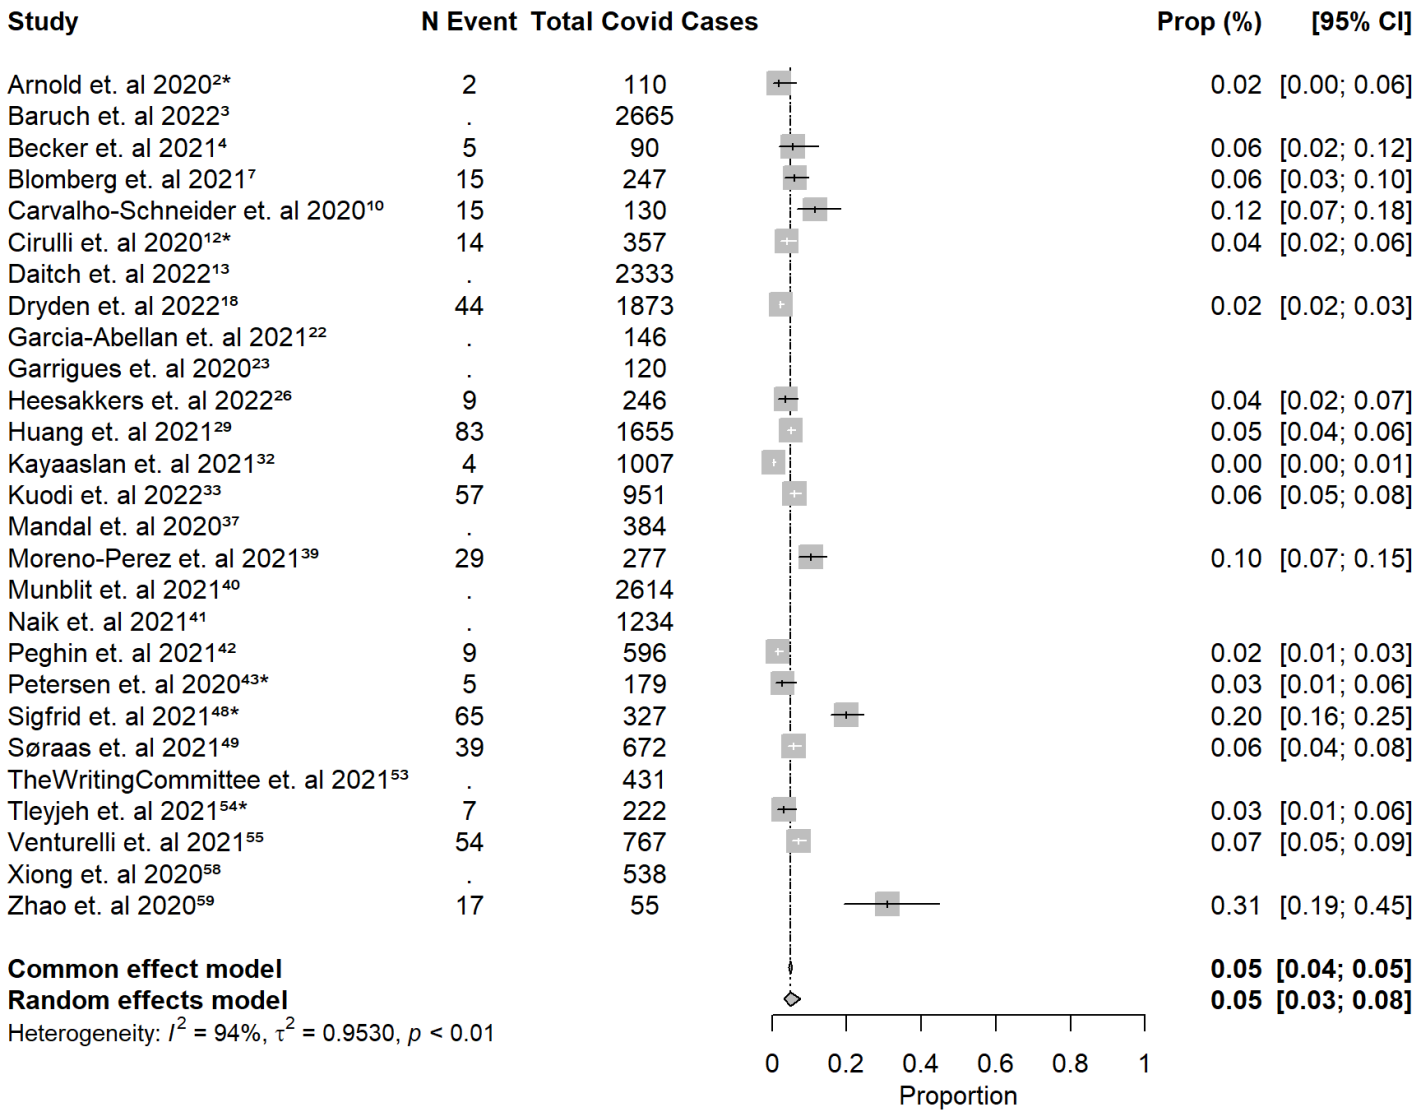

\* indicates value estimated from a figure

Analysis 3  
Gi Symptoms Including Abdominal Pain: EHR

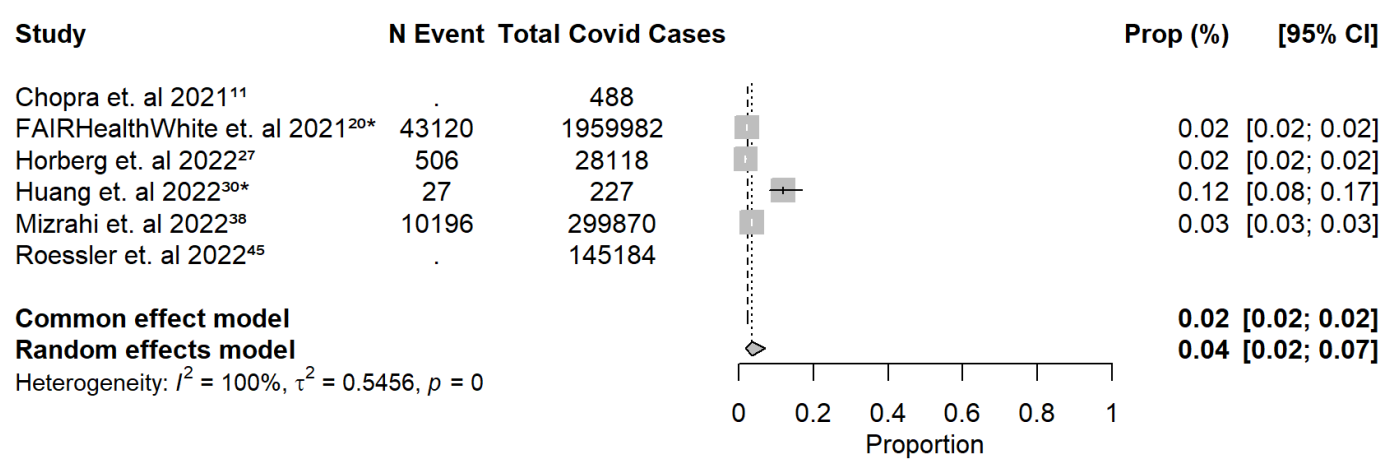

\* indicates value estimated from a figure

Urinary Symptoms:

Analysis 3  
Urinary Symptoms: Survey

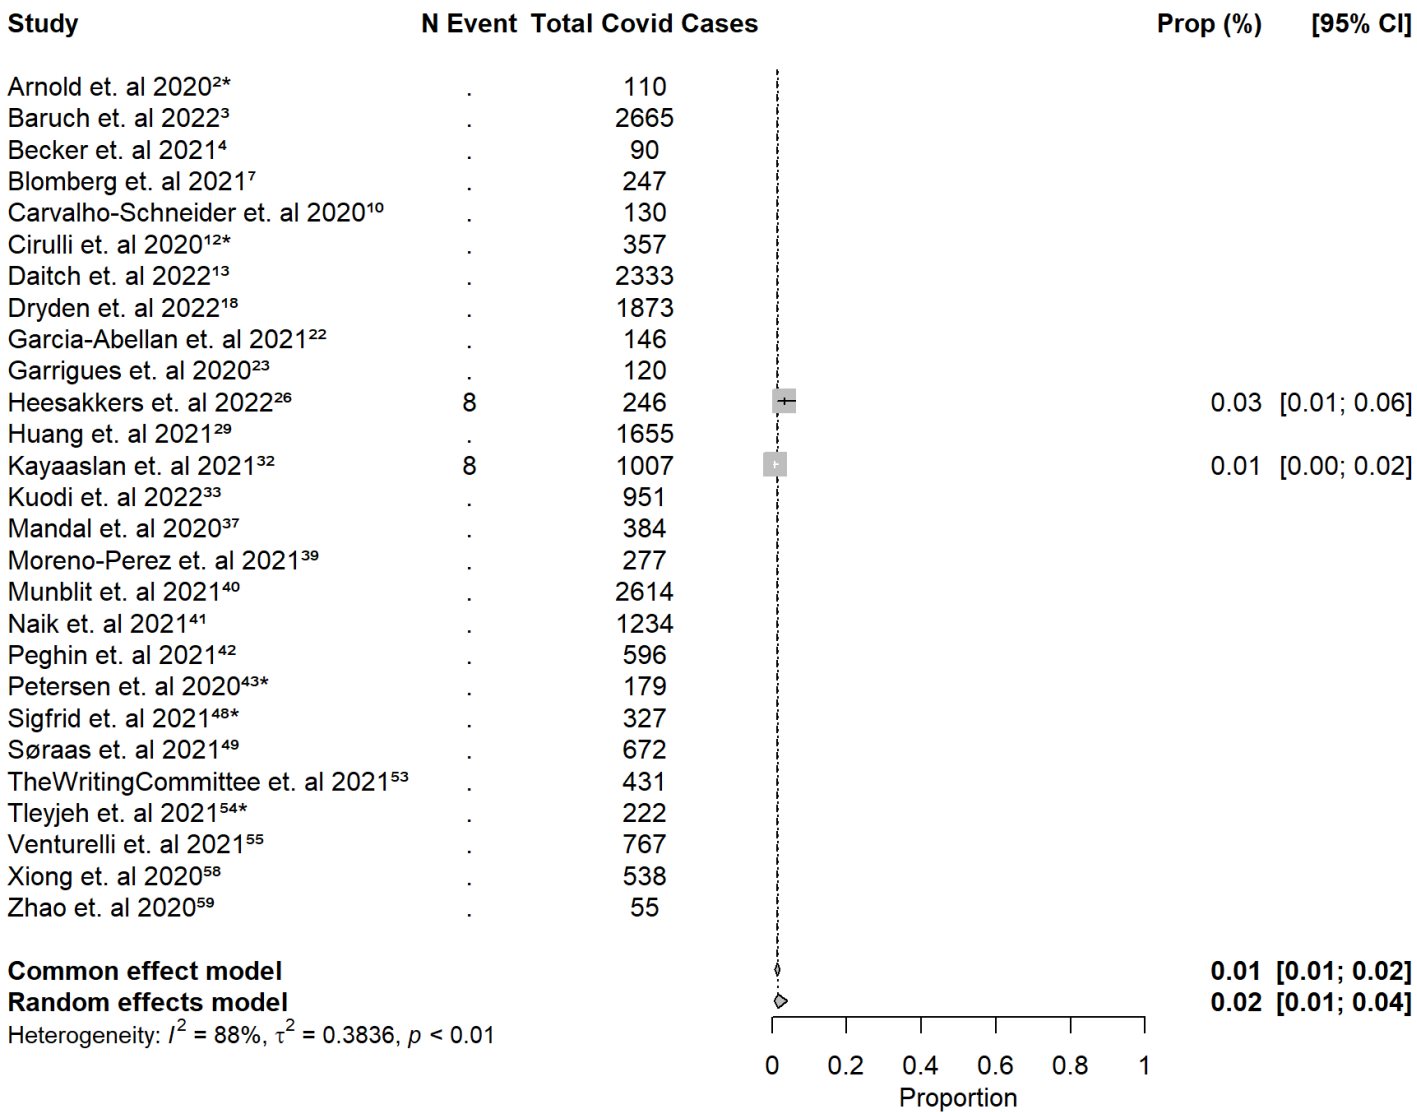

\* indicates value estimated from a figure

Analysis 3  
Urinary Symptoms: EHR

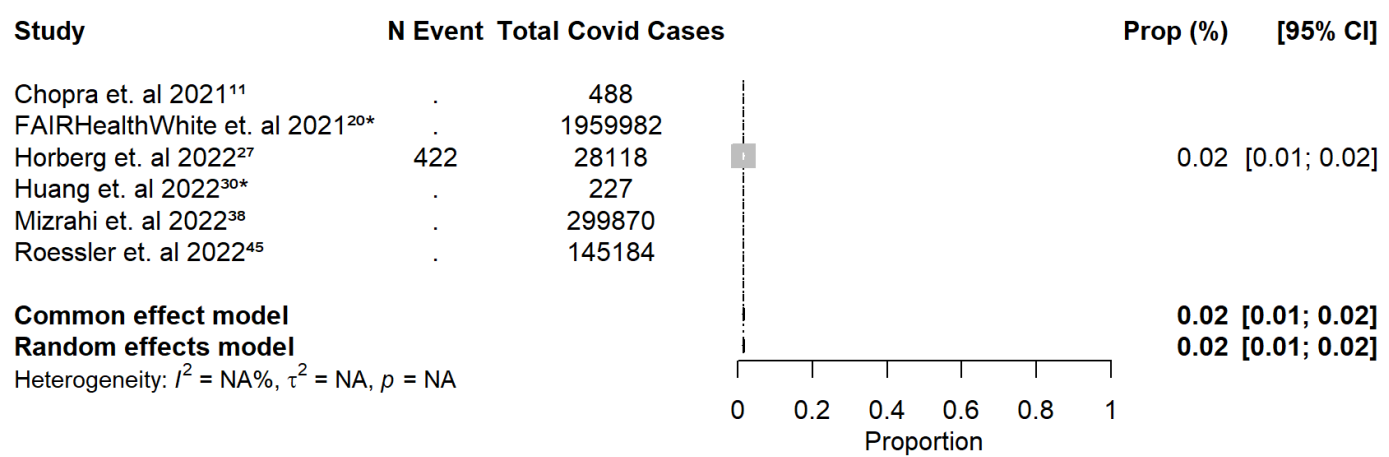

\* indicates value estimated from a figure

Hair Loss:

Analysis 3  
Hair Loss: Survey

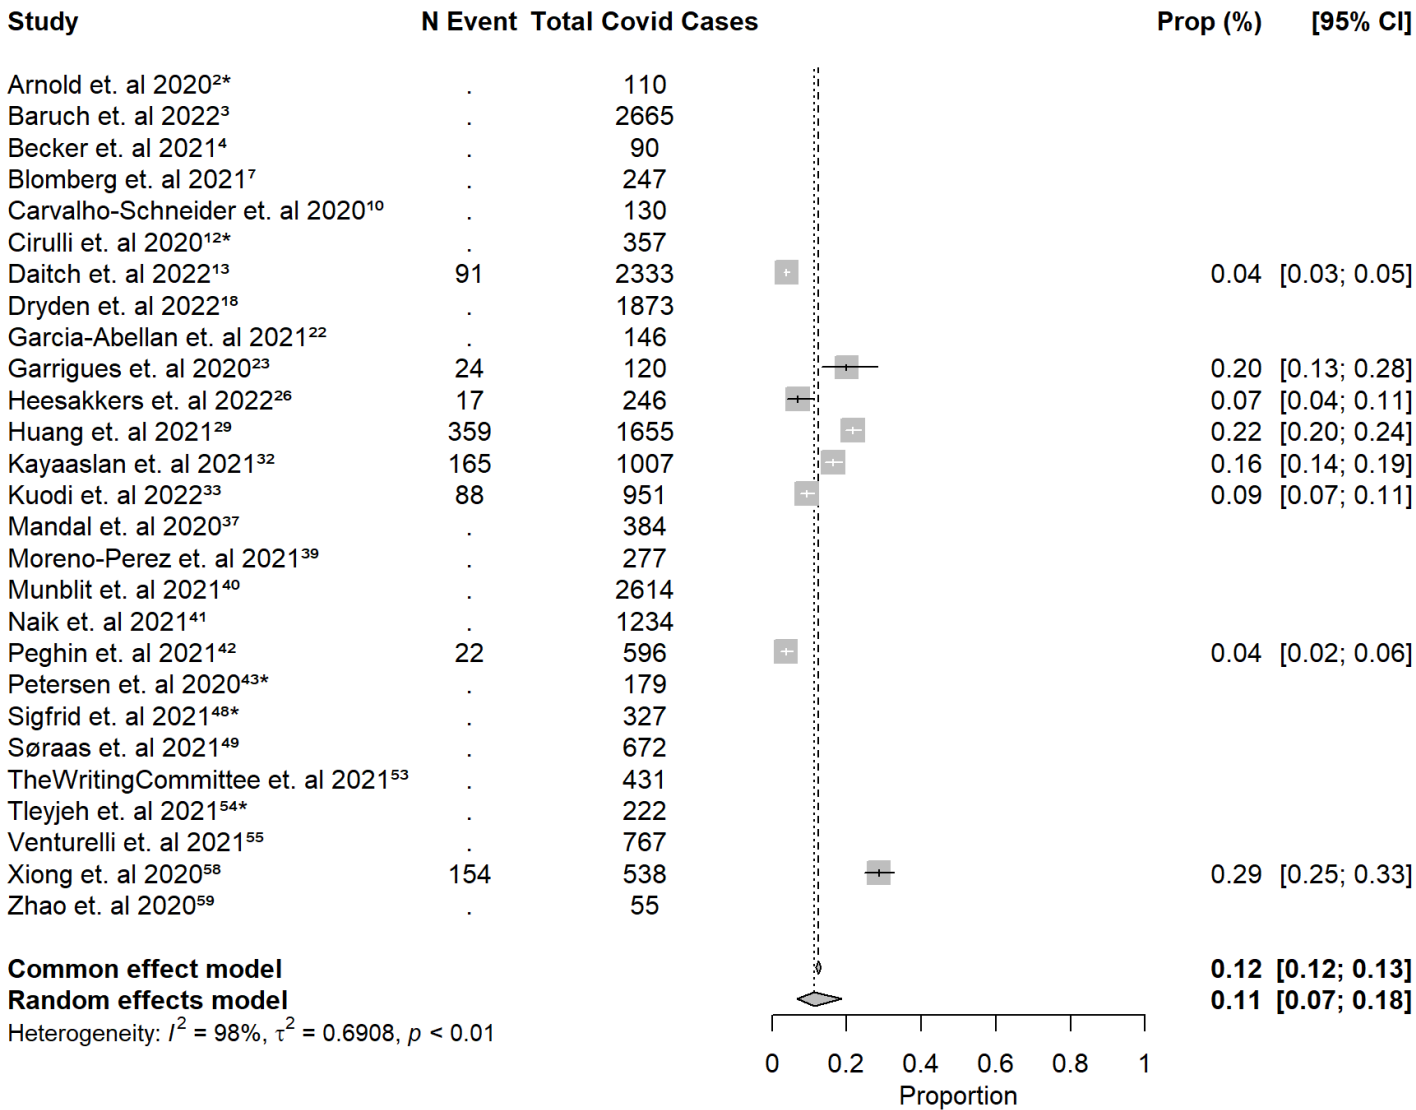

\* indicates value estimated from a figure

Analysis 3  
Hair Loss: EHR



\* indicates value estimated from a figure

Skin Rash:

Analysis 3  
Skin Rash: Survey

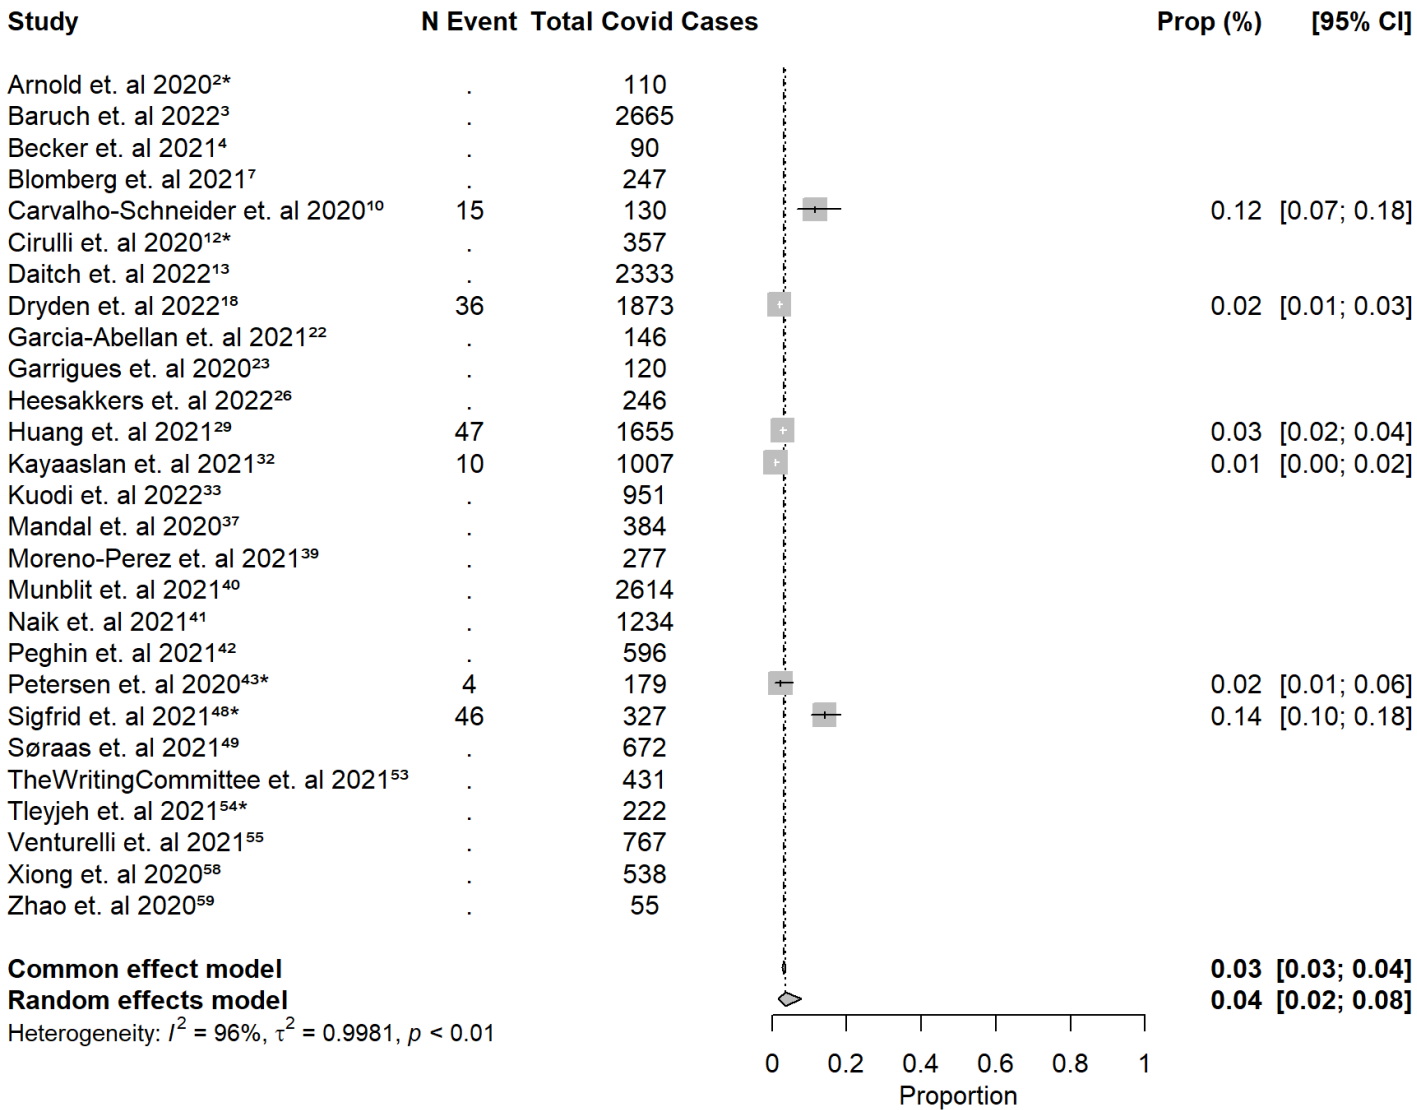

\* indicates value estimated from a figure



Analysis 3  
Skin Rash: EHR

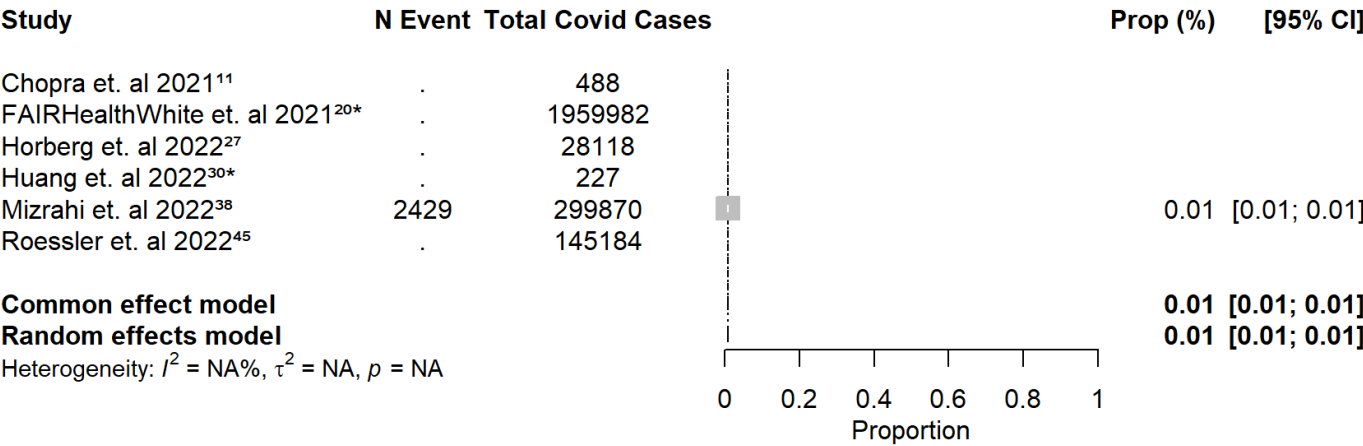

\* indicates value estimated from a figure

# Hearing Problems:

## Analysis 3 Hearing Problems: Survey

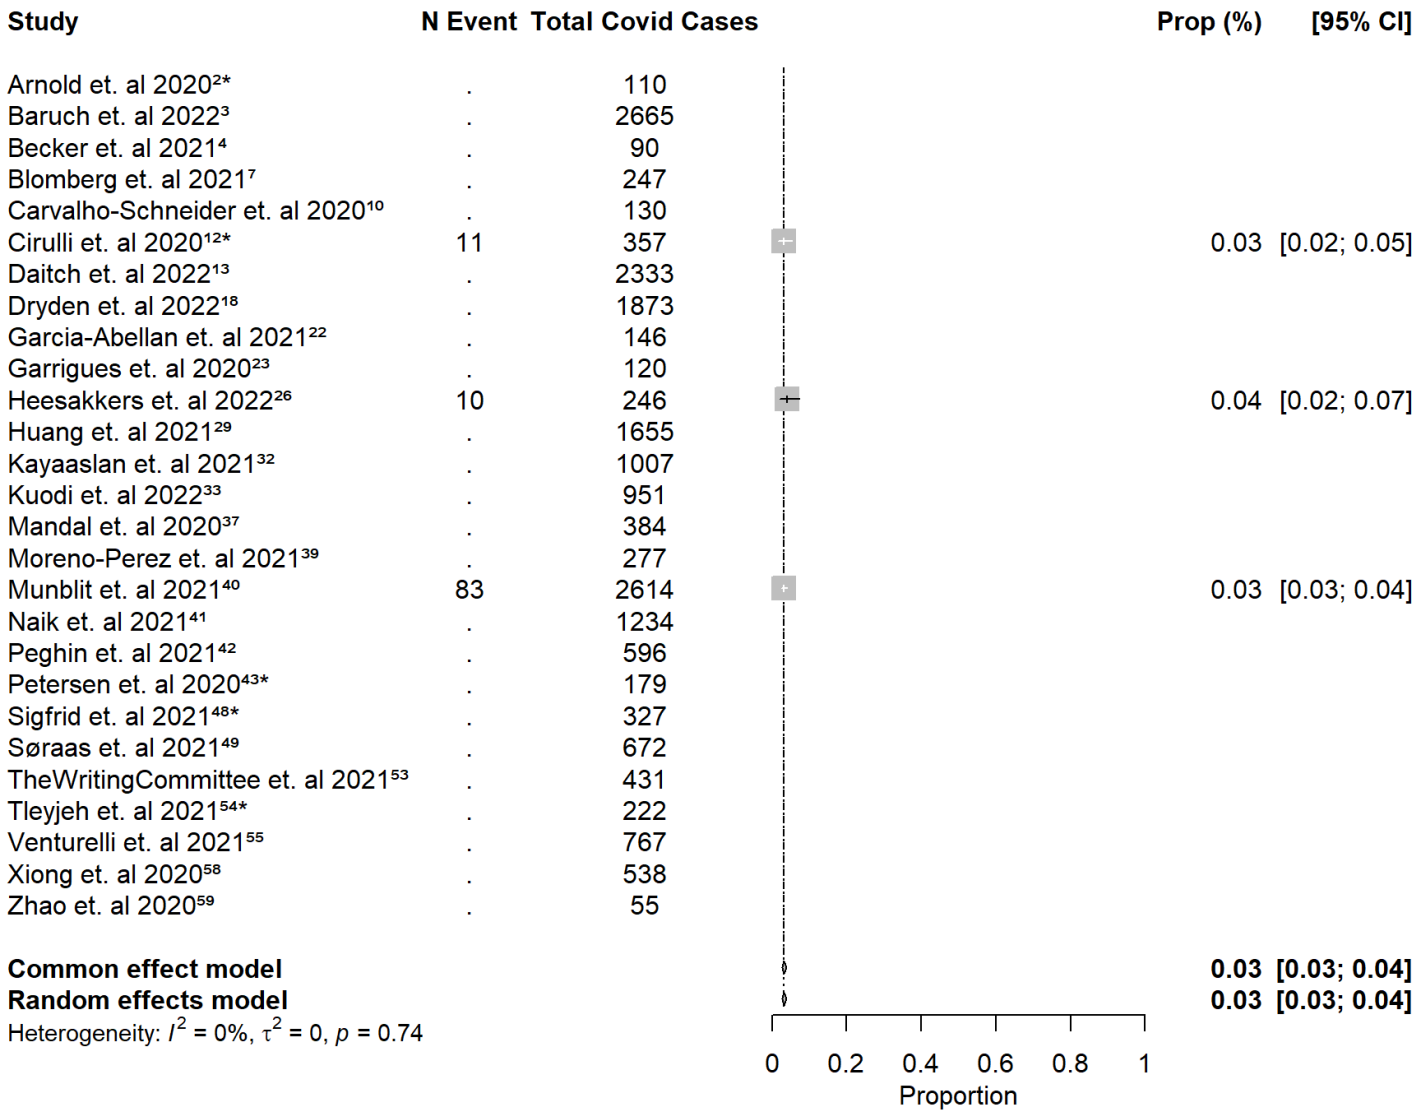

\* indicates value estimated from a figure

Analysis 3  
Hearing Problems: EHR



\* indicates value estimated from a figure

Vision Problems:

Analysis 3  
Vision Problems: Survey

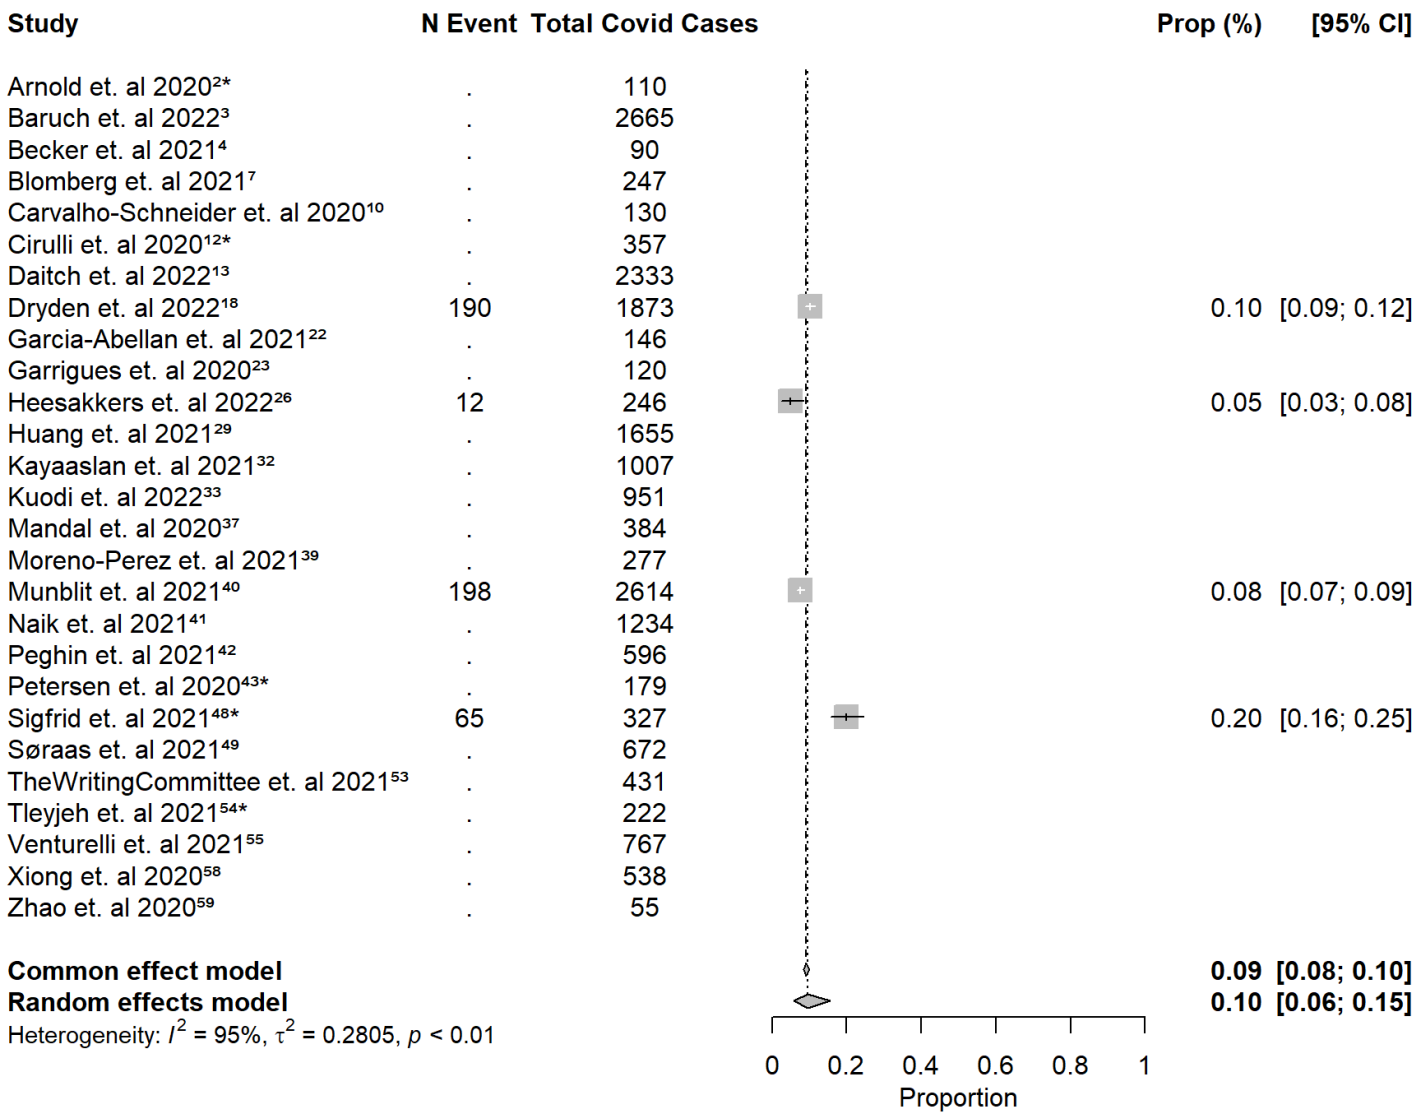

\* indicates value estimated from a figure

Analysis 3  
Vision Problems: EHR



\* indicates value estimated from a figure

# Analysis 4, stratified by hospitalized, non-hospitalized and mixed

Fatigue:

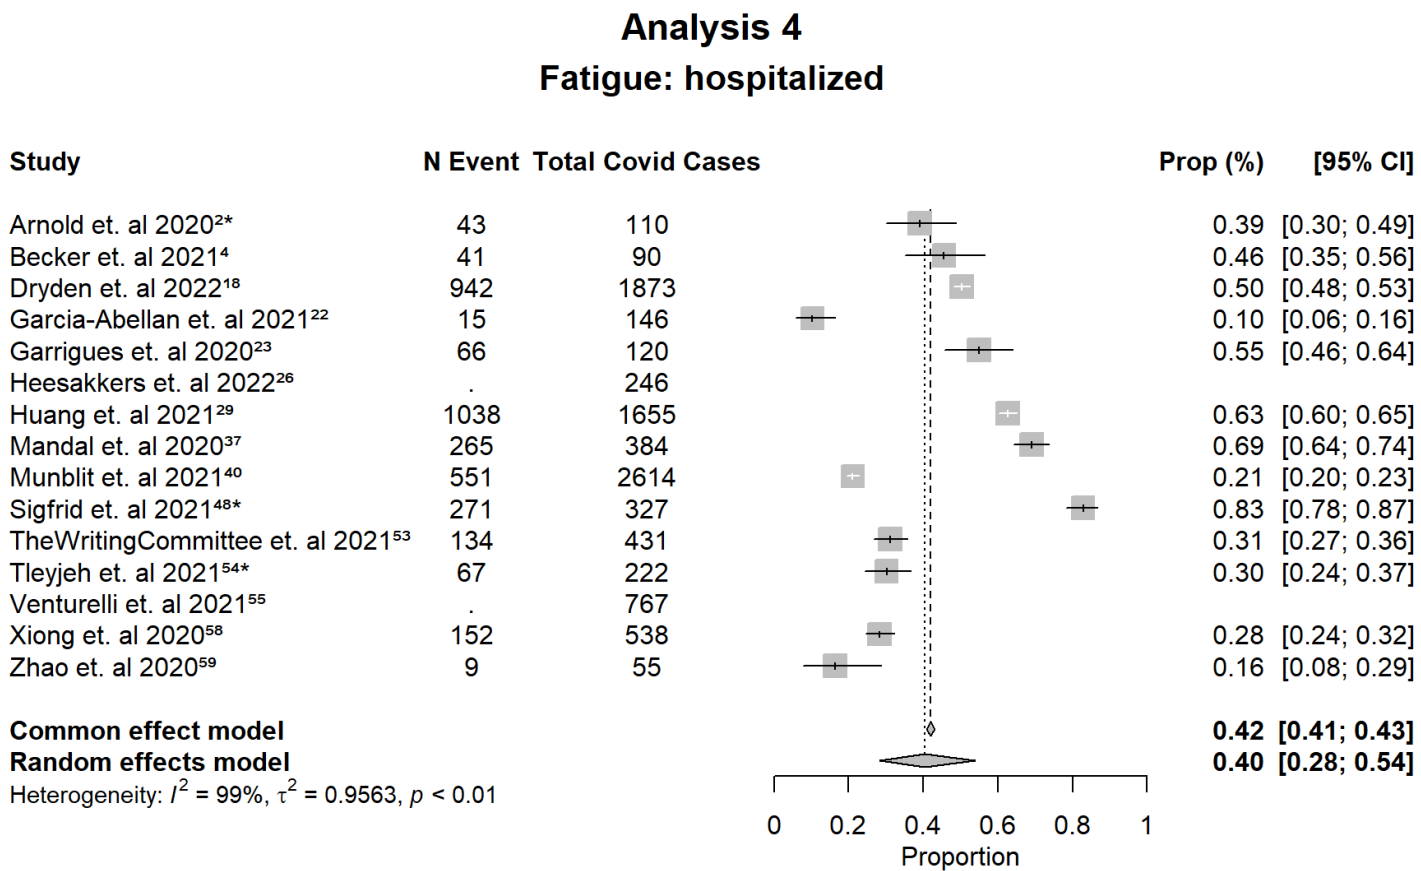

\* indicates value estimated from a figure

Analysis 4

Fatigue: non-hospitalized and mixed

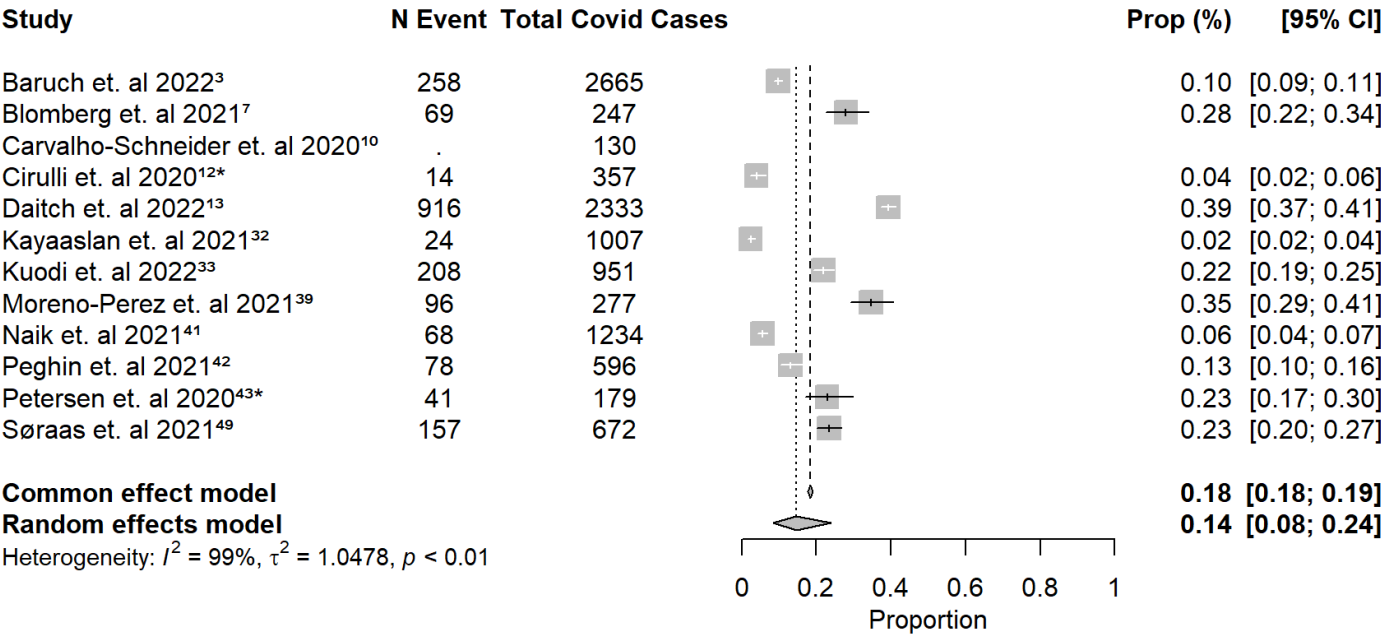

\* indicates value estimated from a figure

# Fever Chills Sweats Or Flushing:

## Analysis 4 Fever Chills Sweats Or Flushing: hospitalized

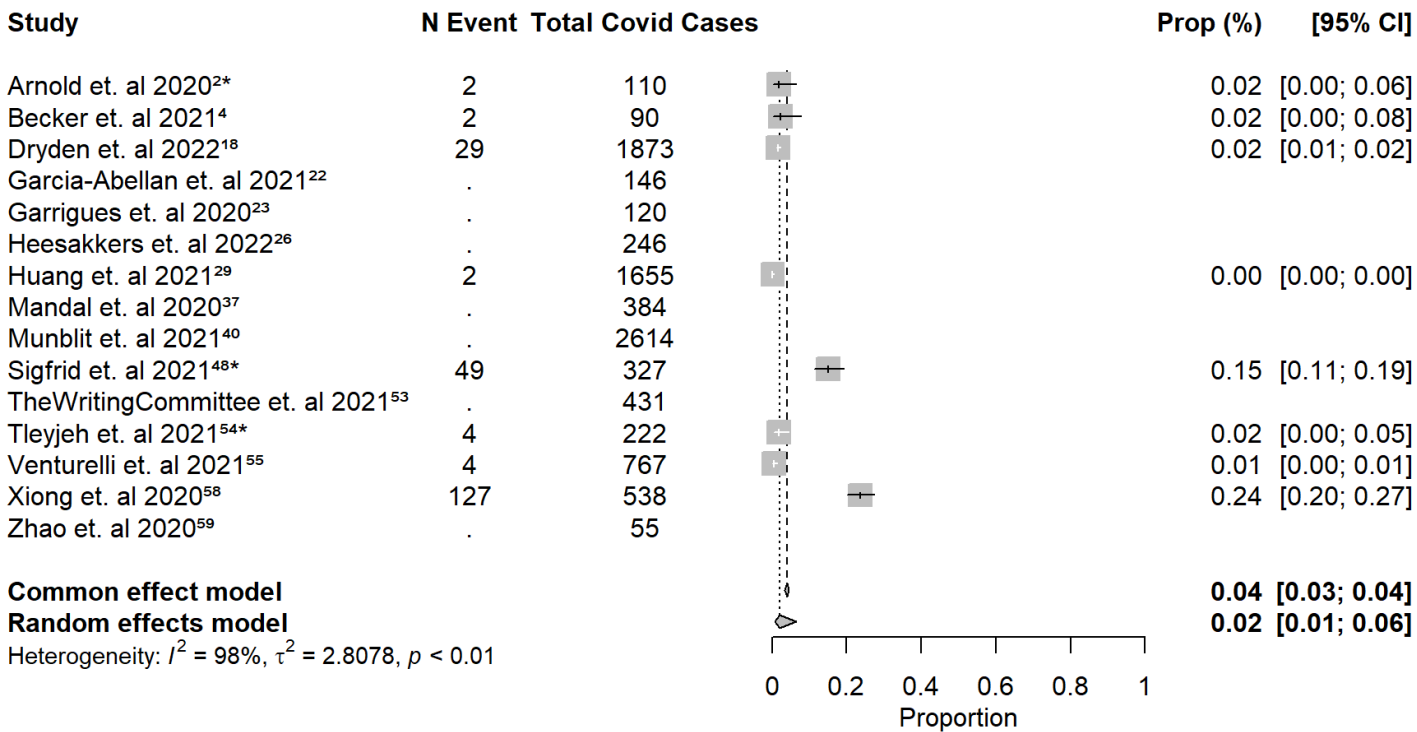

\* indicates value estimated from a figure



Analysis 4

Fever Chills Sweats Or Flushing: non-hospitalized and mixed

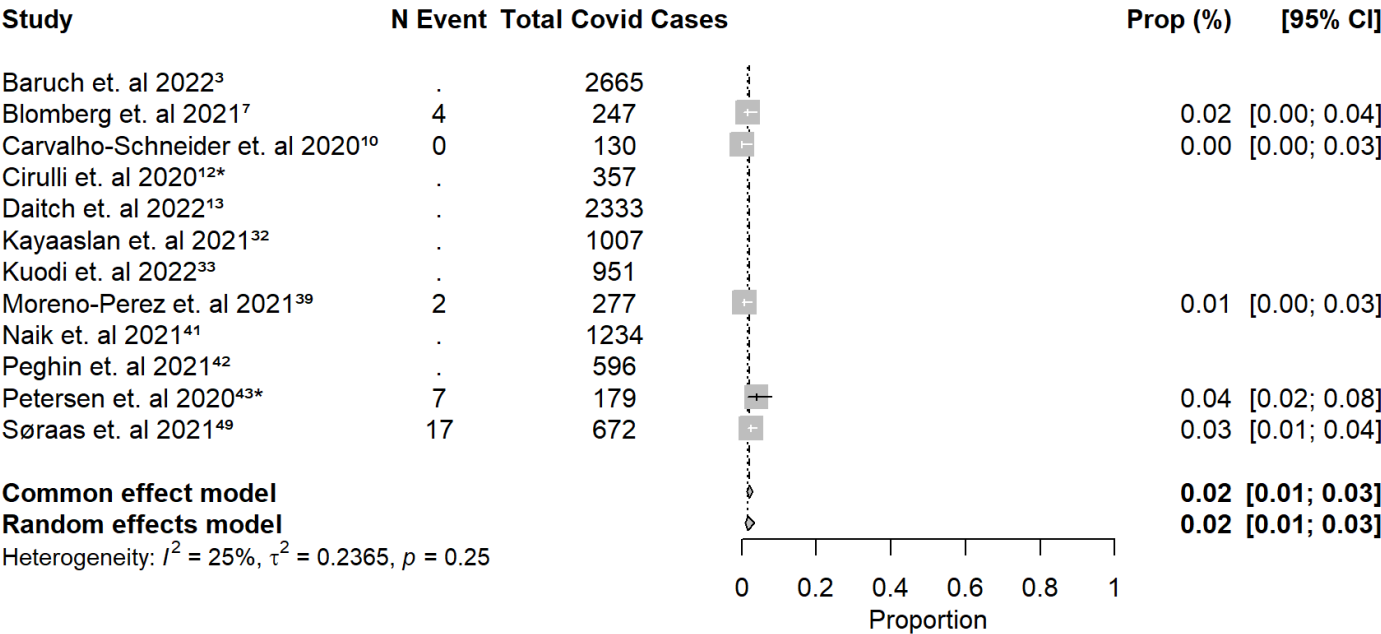

\* indicates value estimated from a figure

Post Exertional Malaise:

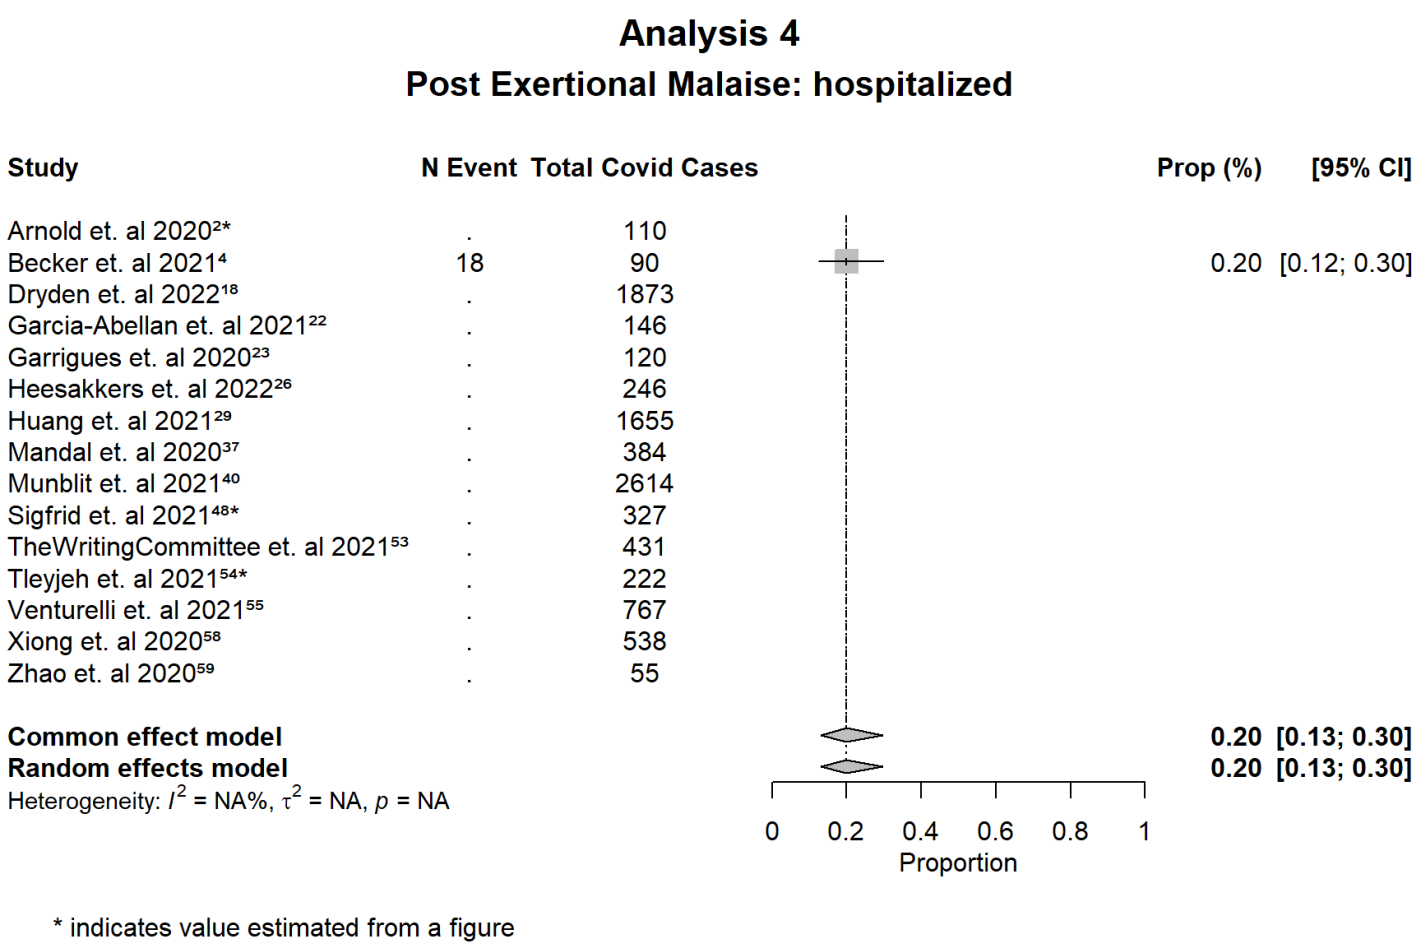

# Cardiac Symptoms Including Chest Pain:

Analysis 4  
Cardiac Symptoms Including Chest Pain: hospitalized

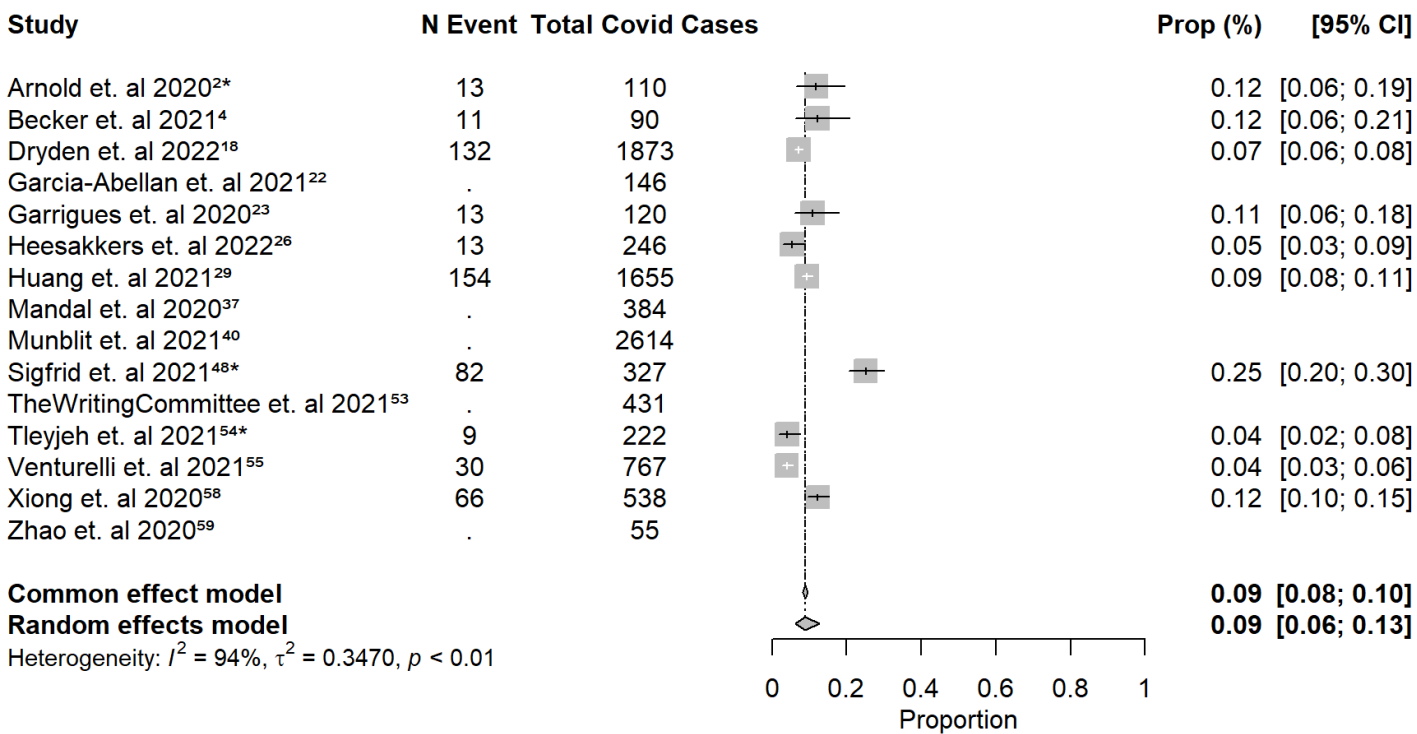

\* indicates value estimated from a figure

Analysis 4

Cardiac Symptoms Including Chest Pain: non-hospitalized and mixed

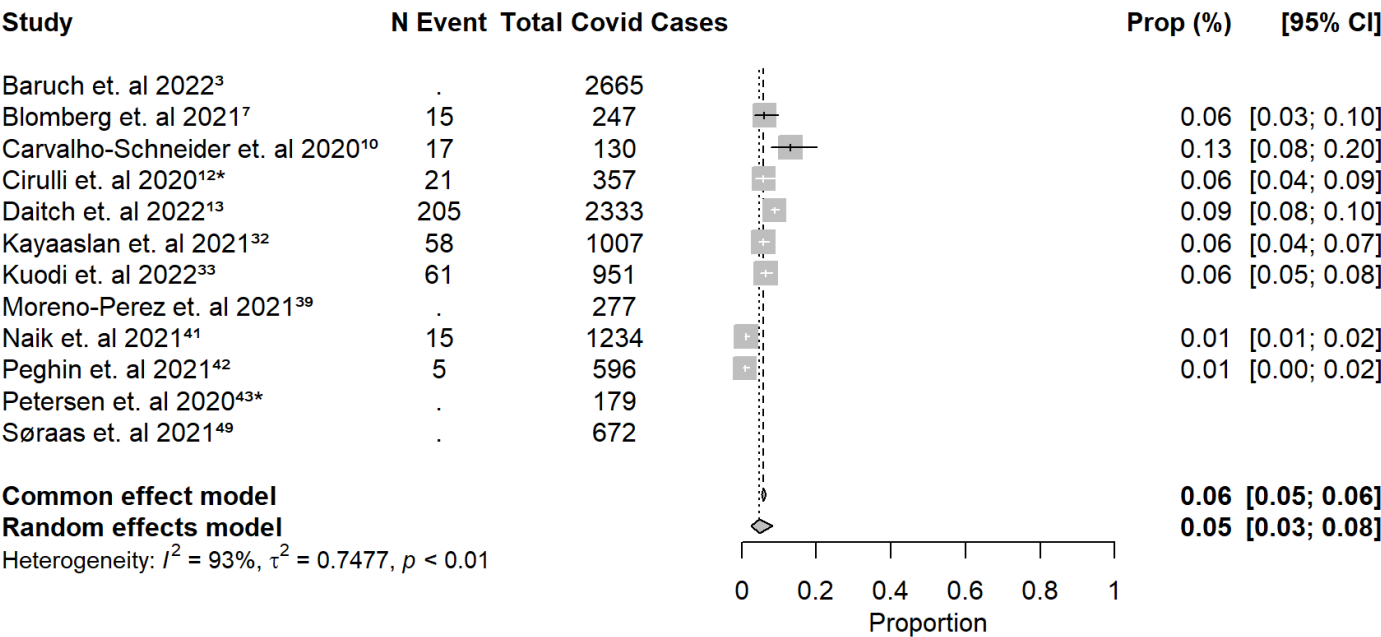

\* indicates value estimated from a figure

Persistant Cough:

Analysis 4  
Persistant Cough: hospitalized

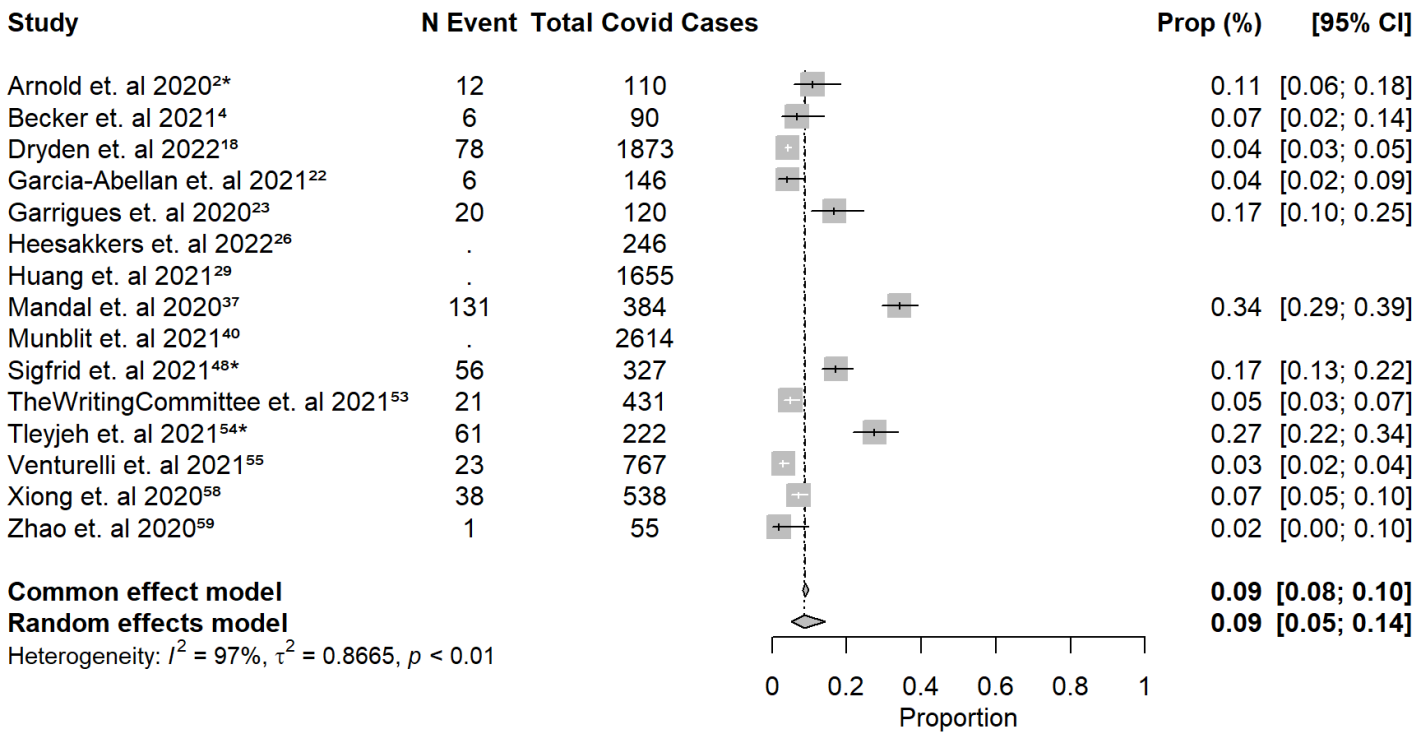

\* indicates value estimated from a figure

Analysis 4

Persistant Cough: non-hospitalized and mixed

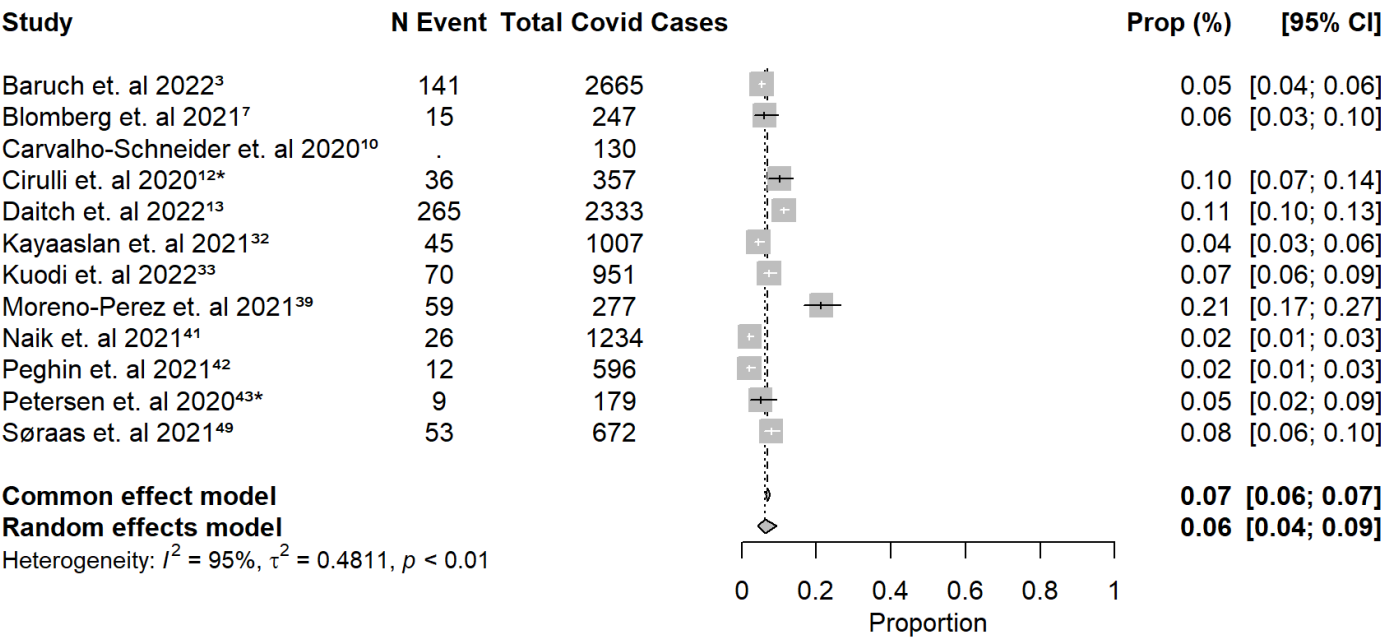

\* indicates value estimated from a figure

Shortness Of Breath:

Analysis 4  
Shortness Of Breath: hospitalized

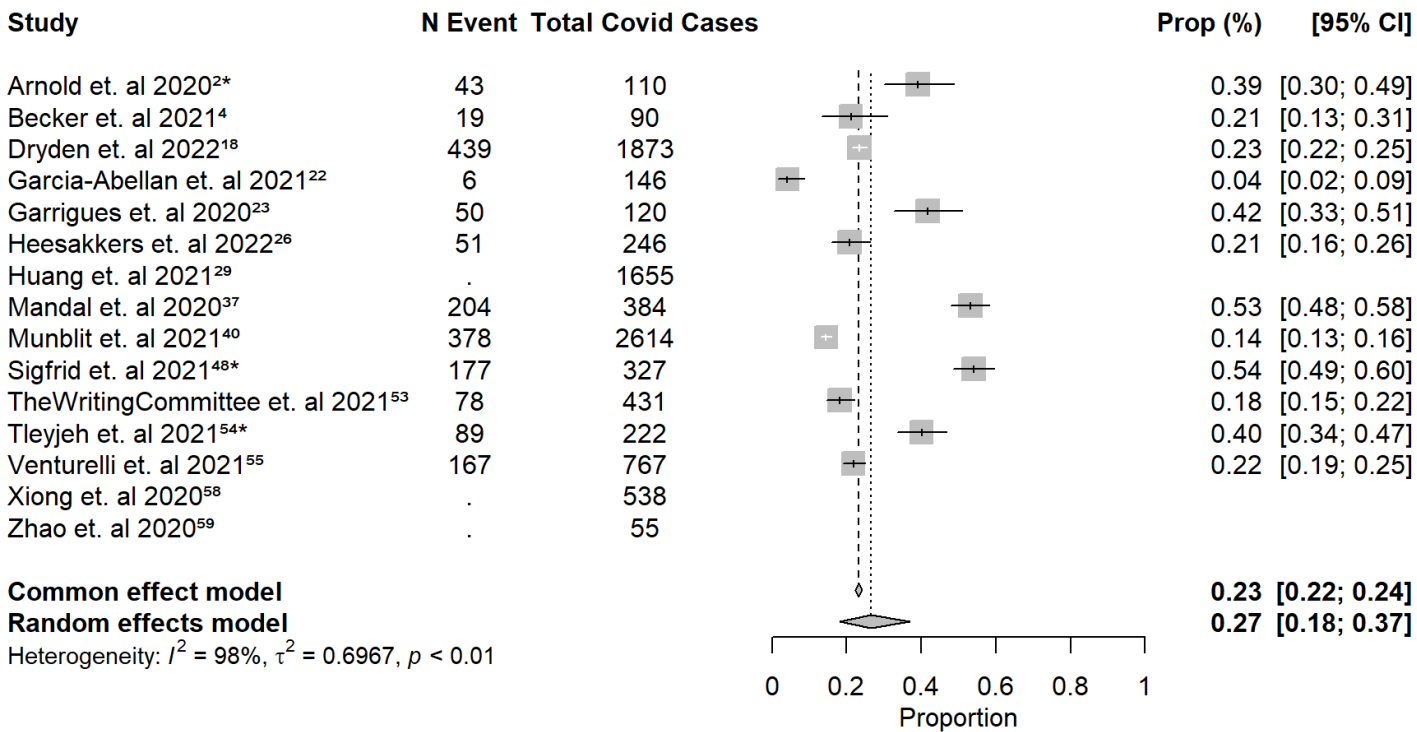

\* indicates value estimated from a figure

# Analysis 4 Shortness Of Breath: non-hospitalized and mixed

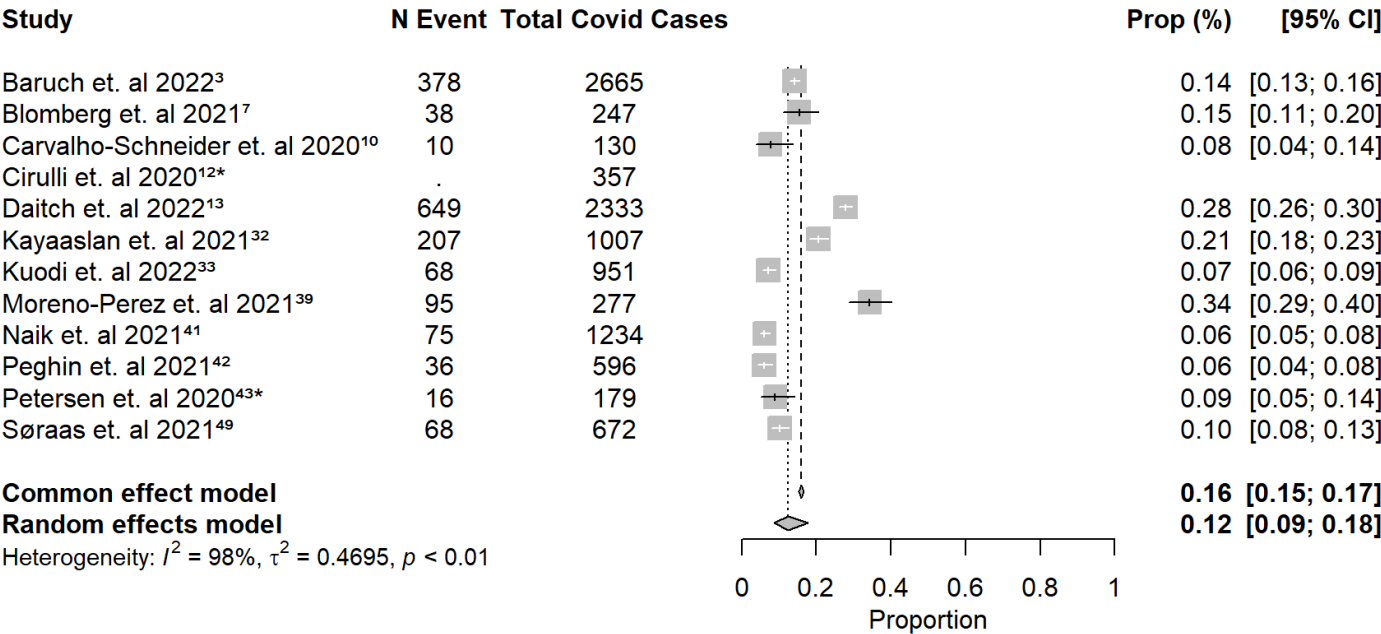

\* indicates value estimated from a figure



# Sleep Problems:

## Analysis 4 Sleep Problems: hospitalized

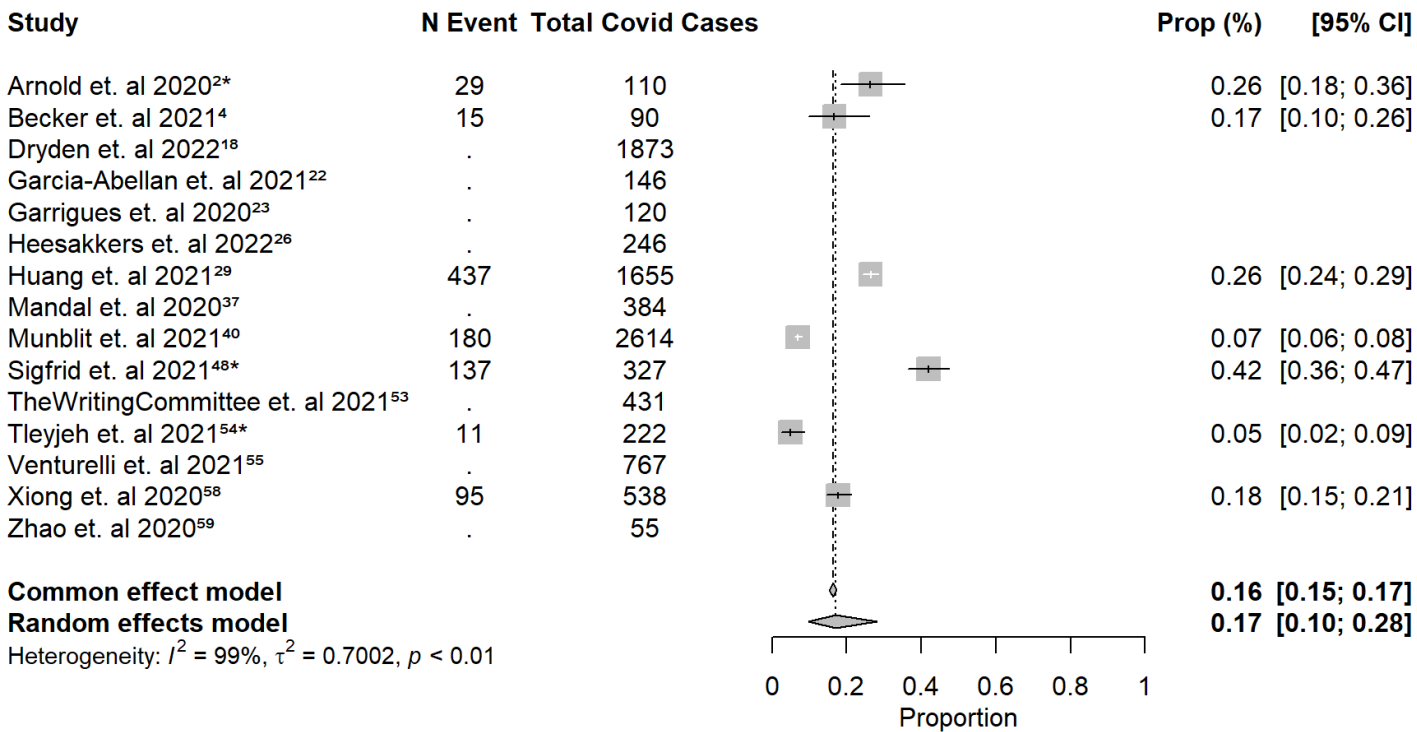

\* indicates value estimated from a figure

Analysis 4

Sleep Problems: non-hospitalized and mixed

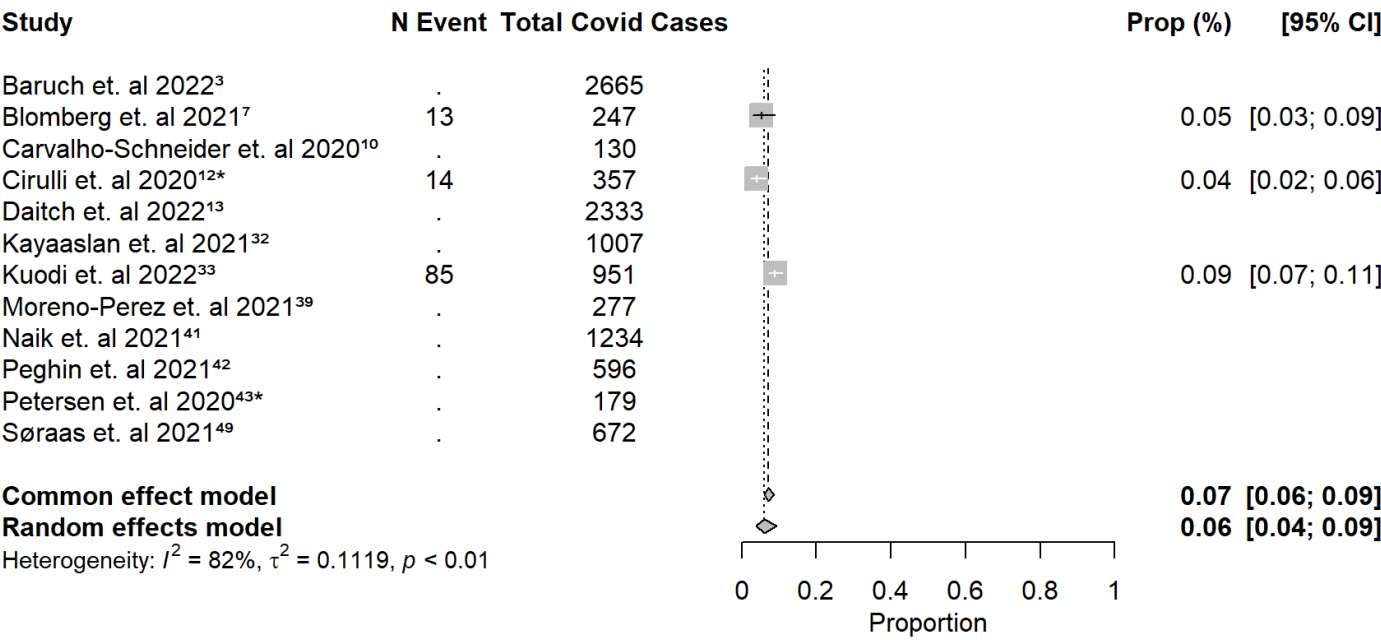

\* indicates value estimated from a figure

# Problems Thinking Or Concentrating:

## Analysis 4 Problems Thinking Or Concentrating: hospitalized

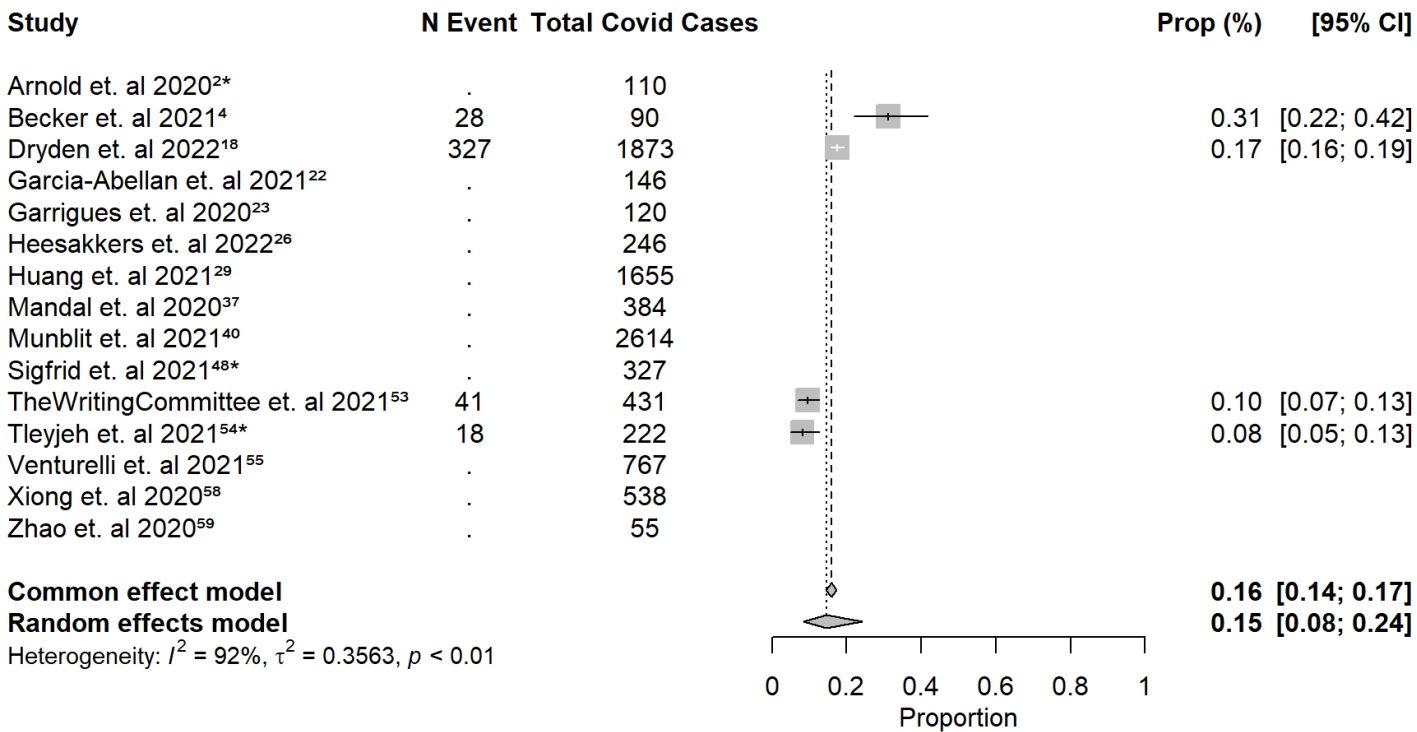

\* indicates value estimated from a figure

Analysis 4

Problems Thinking Or Concentrating: non-hospitalized and mixed

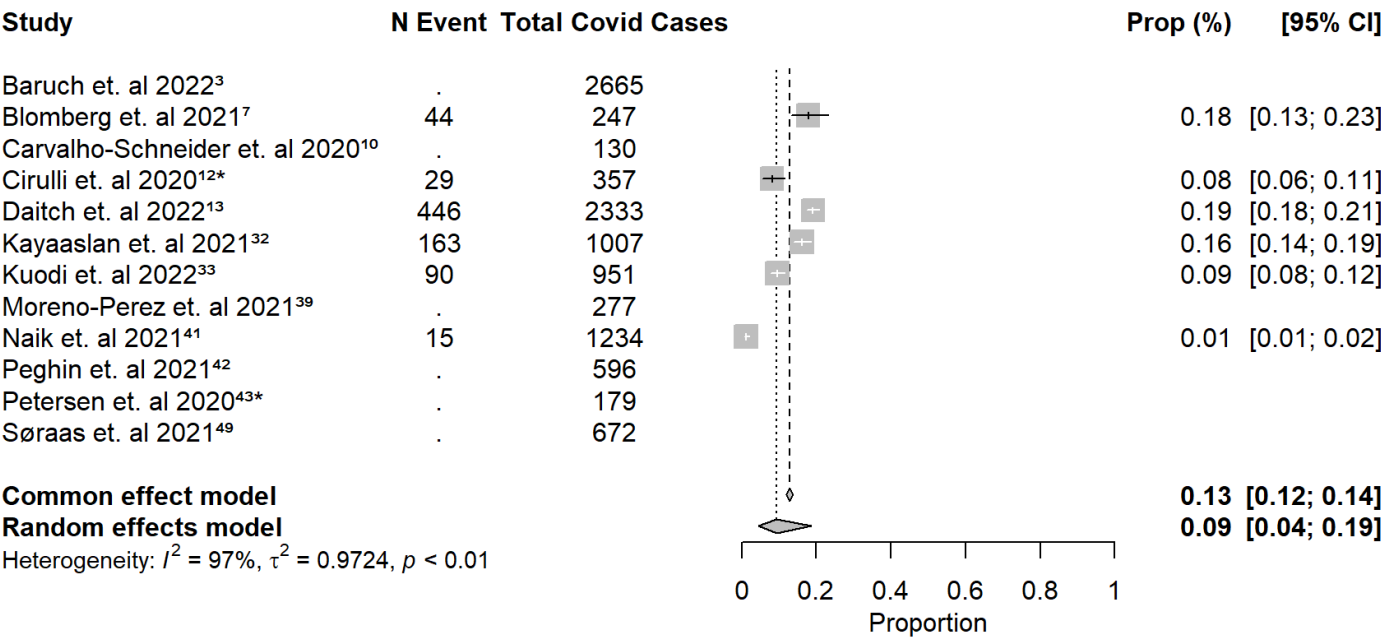

\* indicates value estimated from a figure

Dizziness:

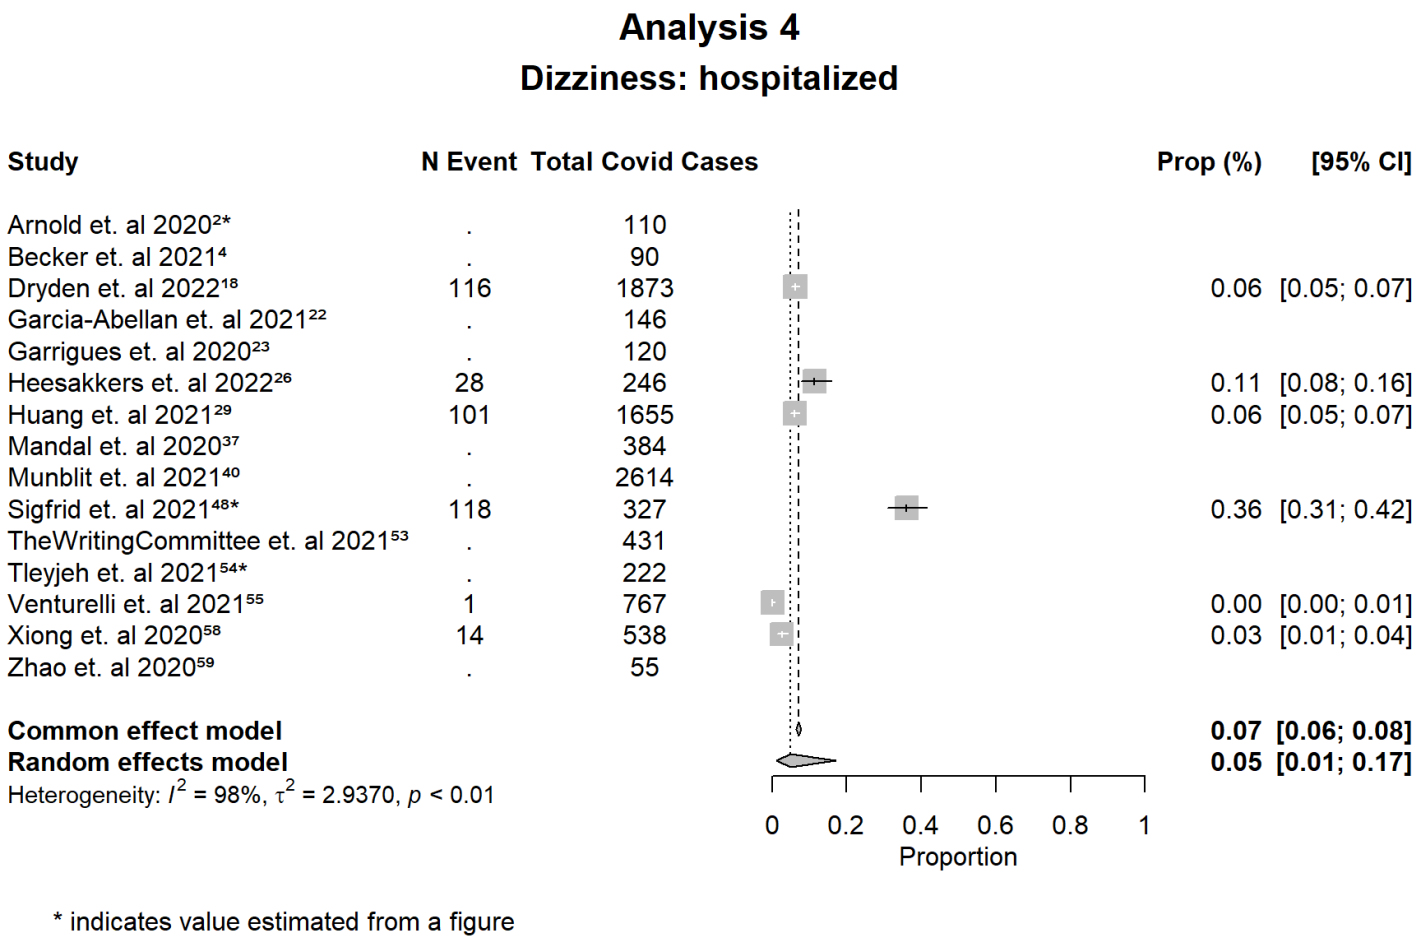

Analysis 4  
Dizziness: non-hospitalized and mixed

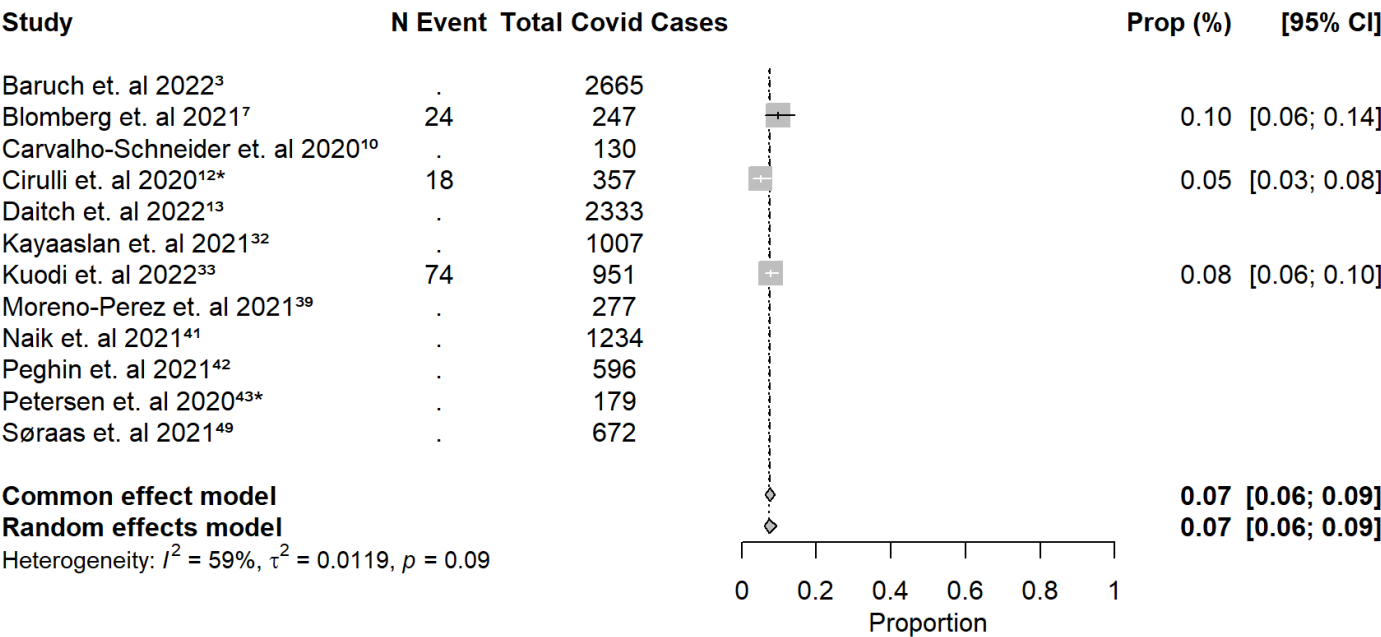

\* indicates value estimated from a figure

Headache:

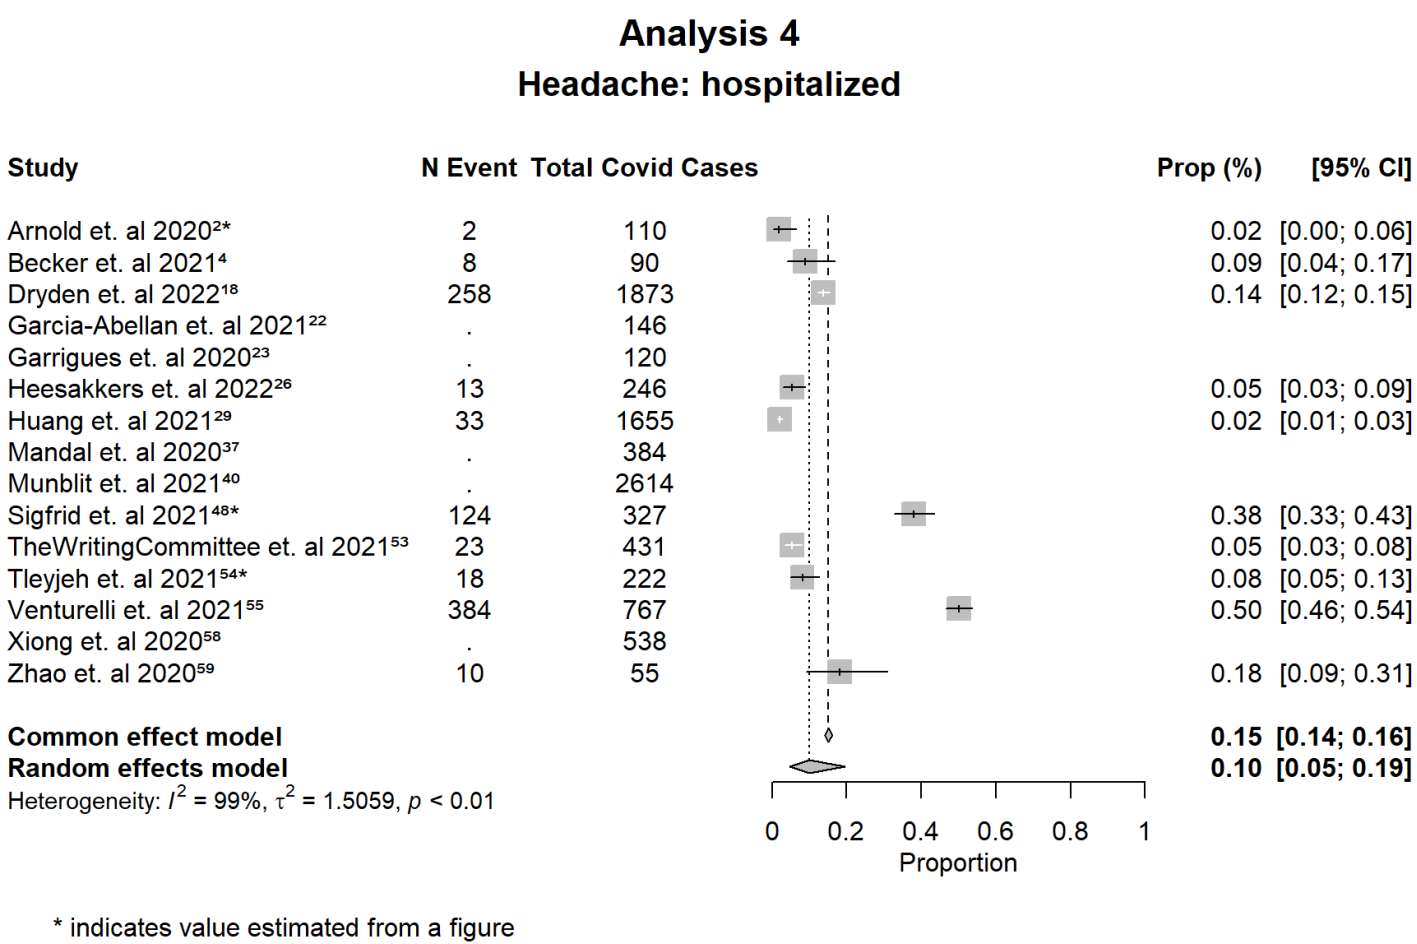

Analysis 4  
Headache: non-hospitalized and mixed

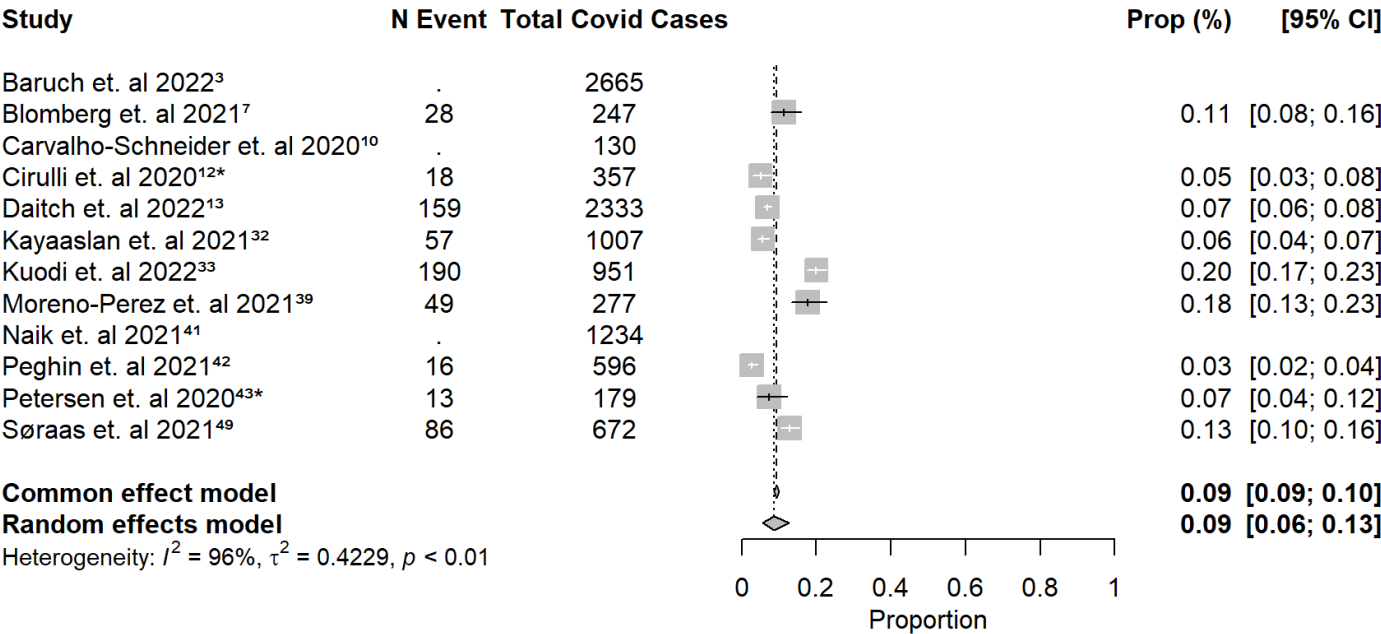

\* indicates value estimated from a figure



Nerve Problems Seizures:

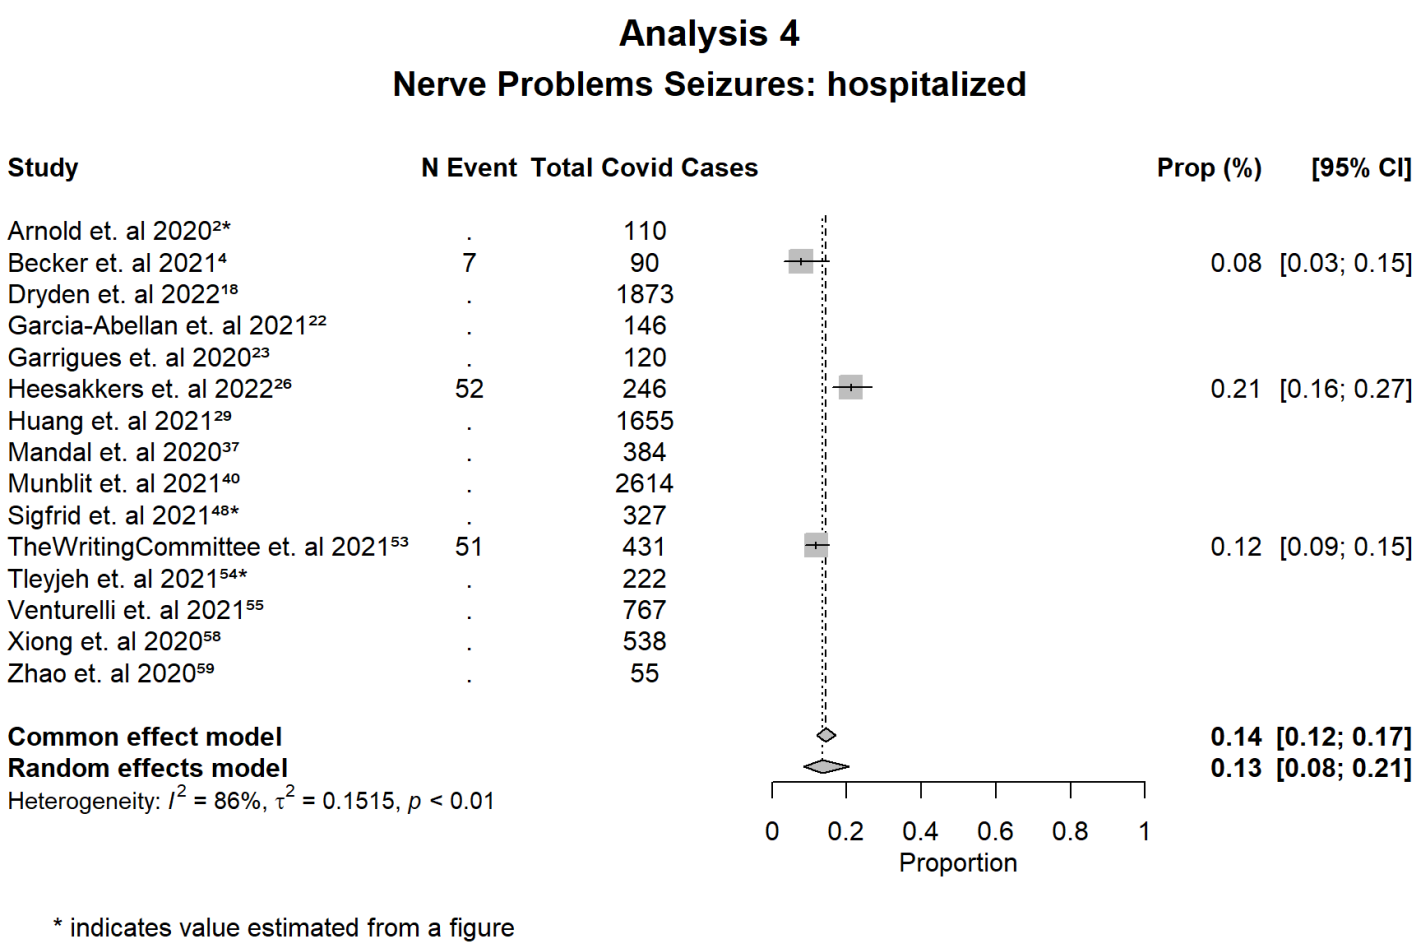

Analysis 4

Nerve Problems Seizures: non-hospitalized and mixed

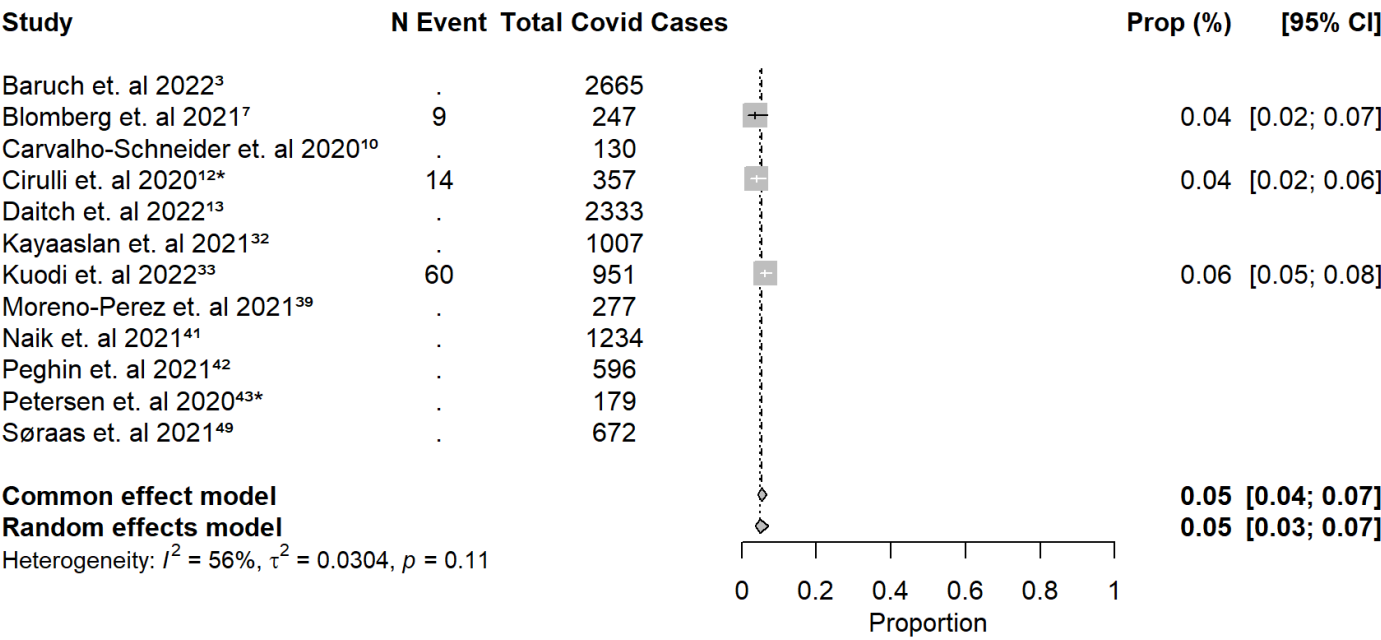

\* indicates value estimated from a figure

# Loss Of Or Change In Smell Or Taste:

## Analysis 4 Loss Of Or Change In Smell Or Taste: hospitalized

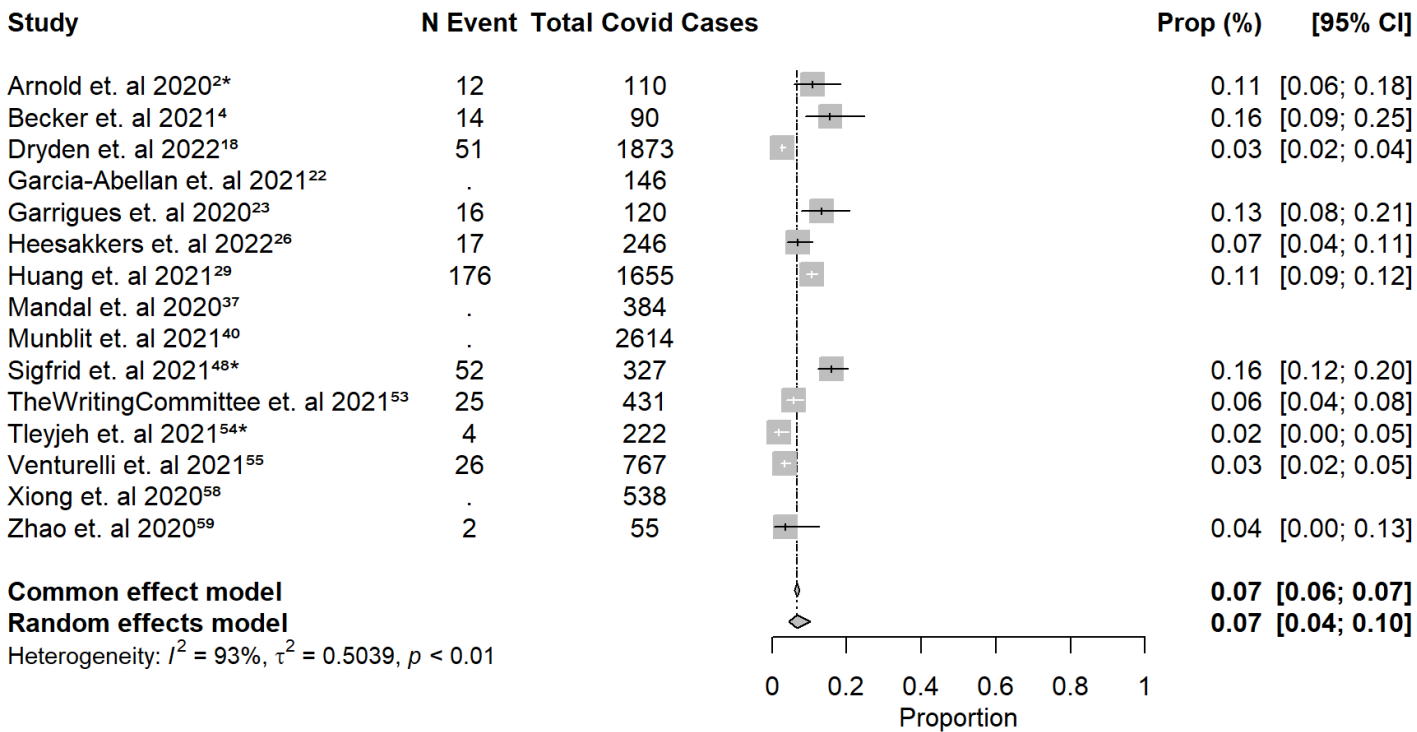

\* indicates value estimated from a figure

Analysis 4

Loss Of Or Change In Smell Or Taste: non-hospitalized and mixed

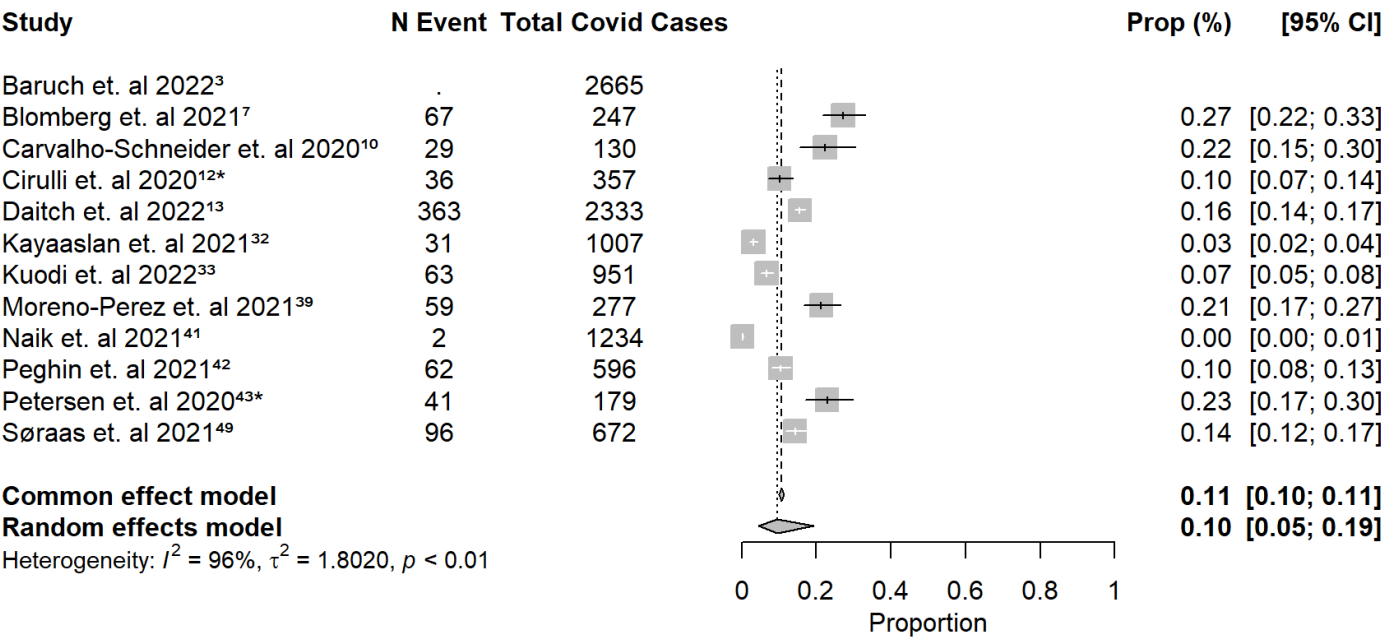

\* indicates value estimated from a figure

# Mental Health Concerns:

## Analysis 4 Mental Health Concerns: hospitalized

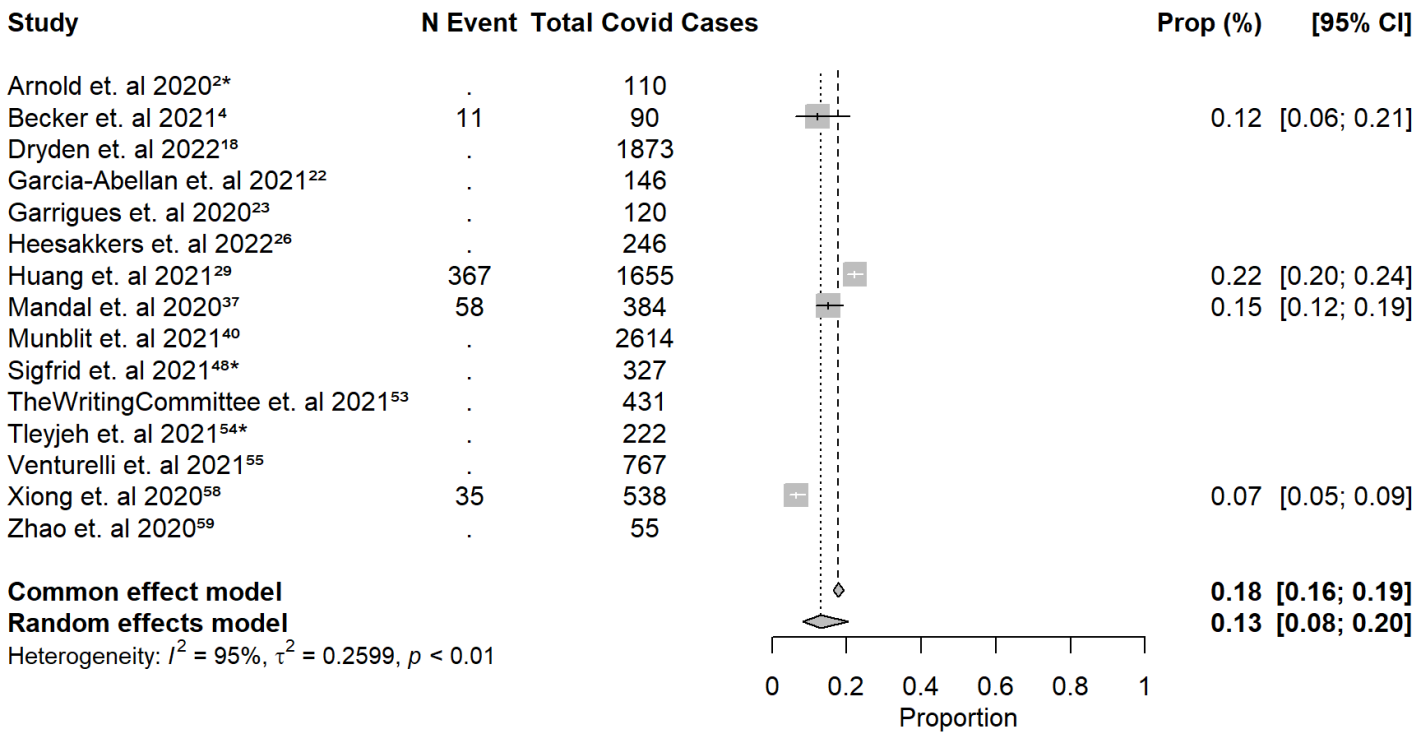

\* indicates value estimated from a figure

Analysis 4

Mental Health Concerns: non-hospitalized and mixed

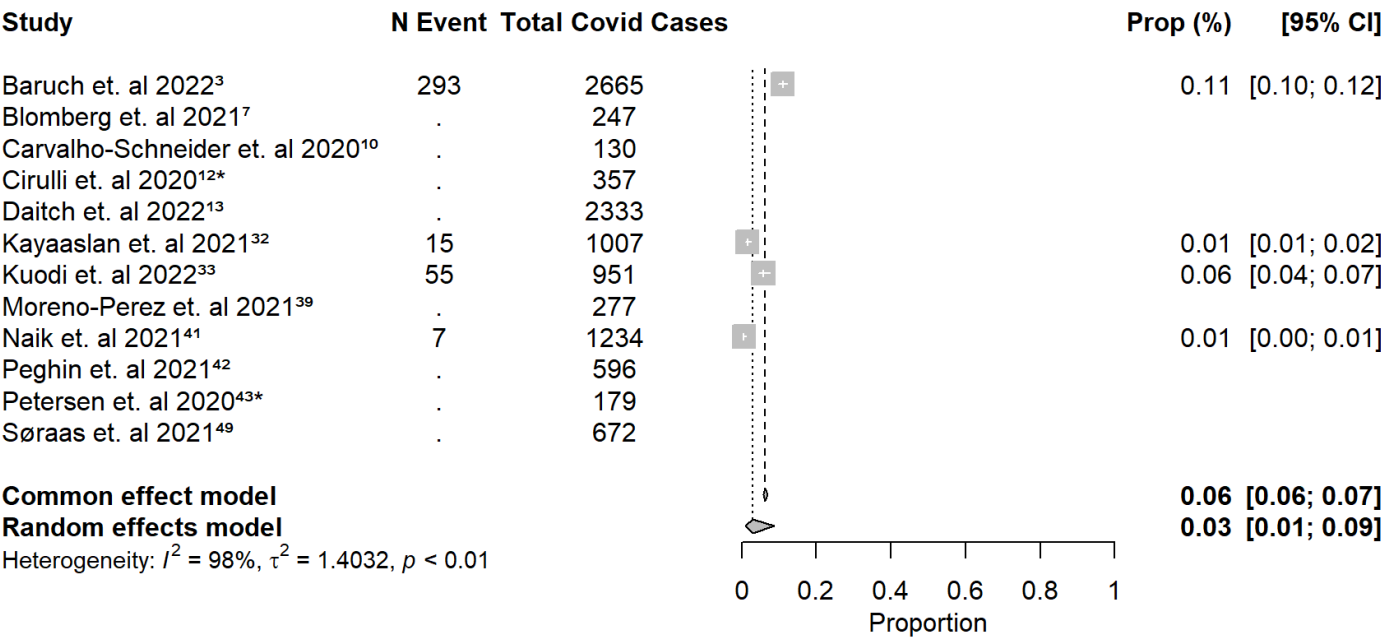

\* indicates value estimated from a figure

Joint Muscle Pain:

Analysis 4  
Joint Muscle Pain: hospitalized

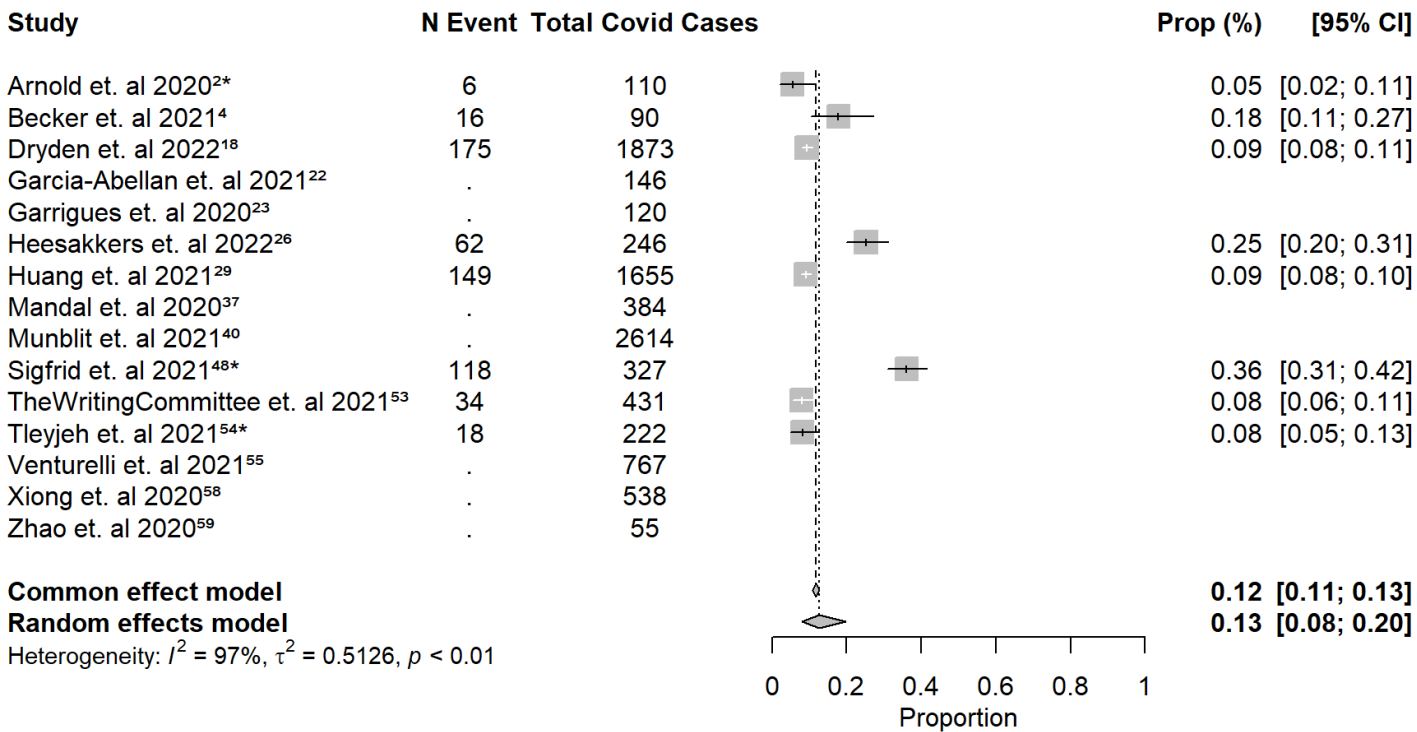

\* indicates value estimated from a figure

Analysis 4

Joint Muscle Pain: non-hospitalized and mixed

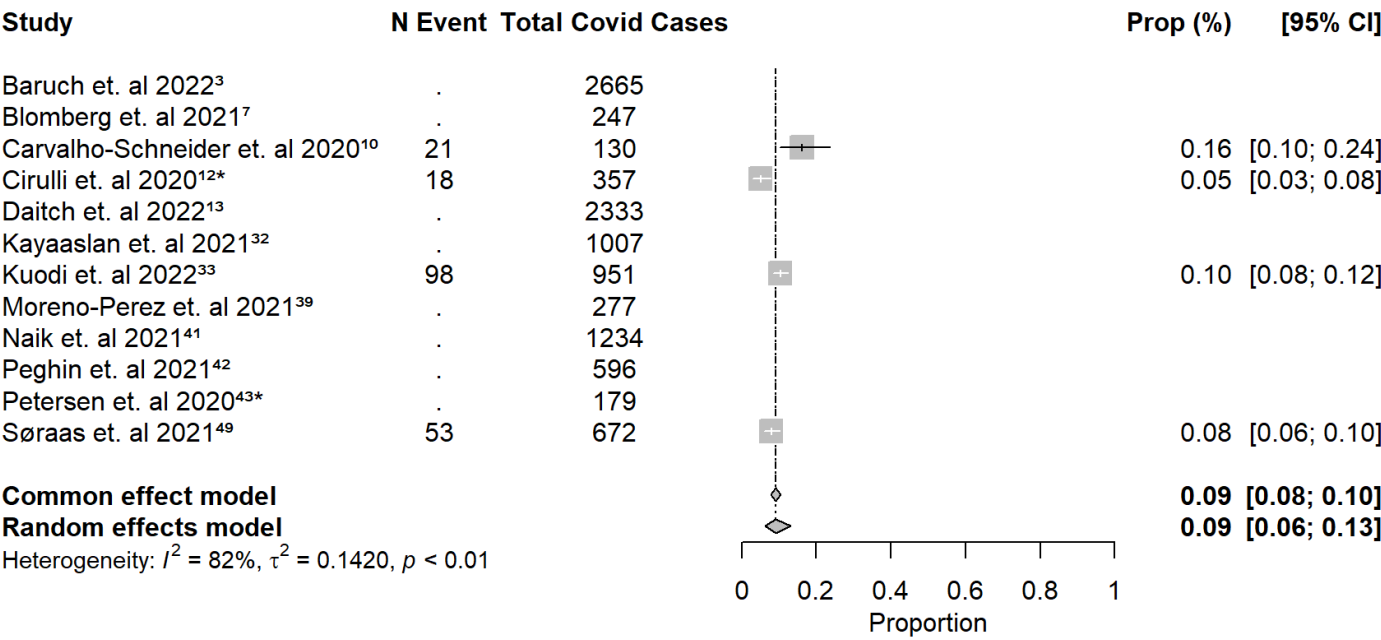

\* indicates value estimated from a figure



Weakness In Arms Or Legs:

Analysis 4  
Weakness In Arms Or Legs: hospitalized

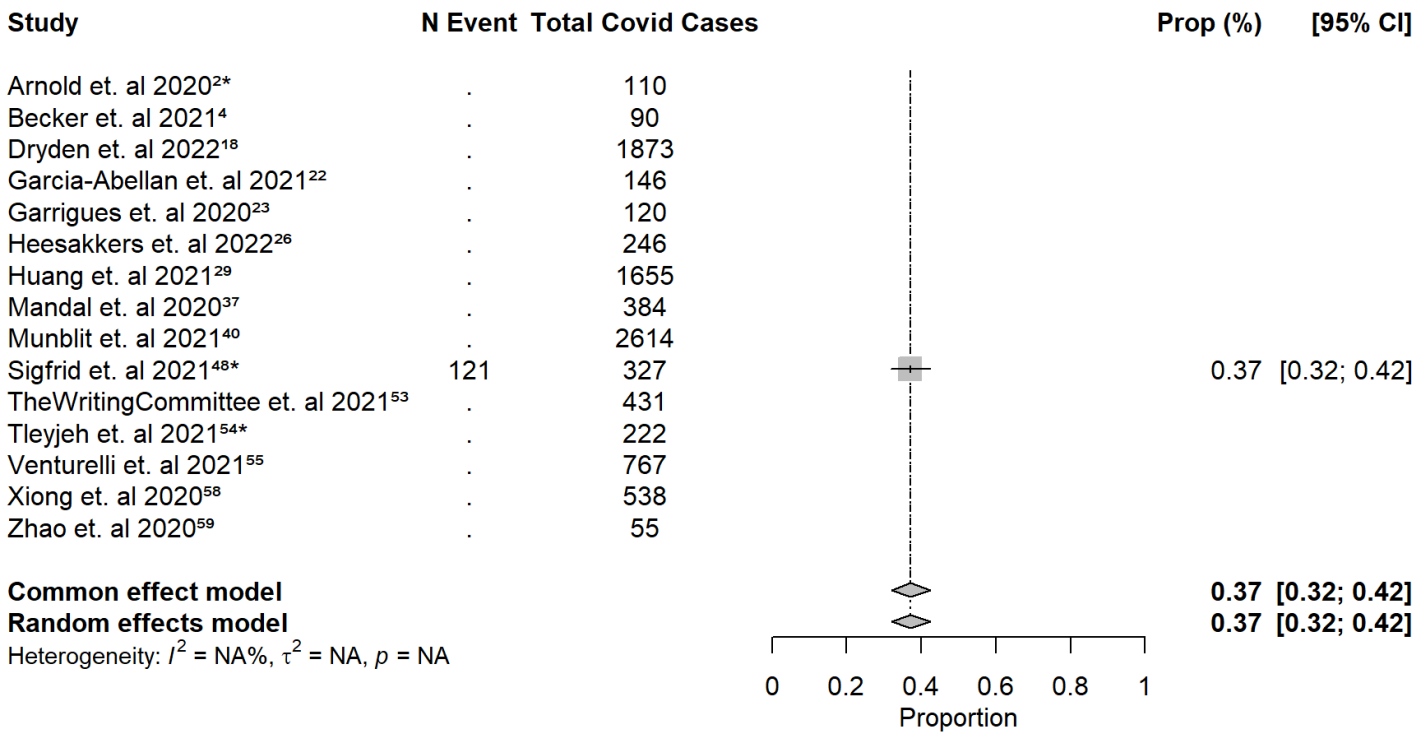

\* indicates value estimated from a figure

Analysis 4

Weakness In Arms Or Legs: non-hospitalized and mixed

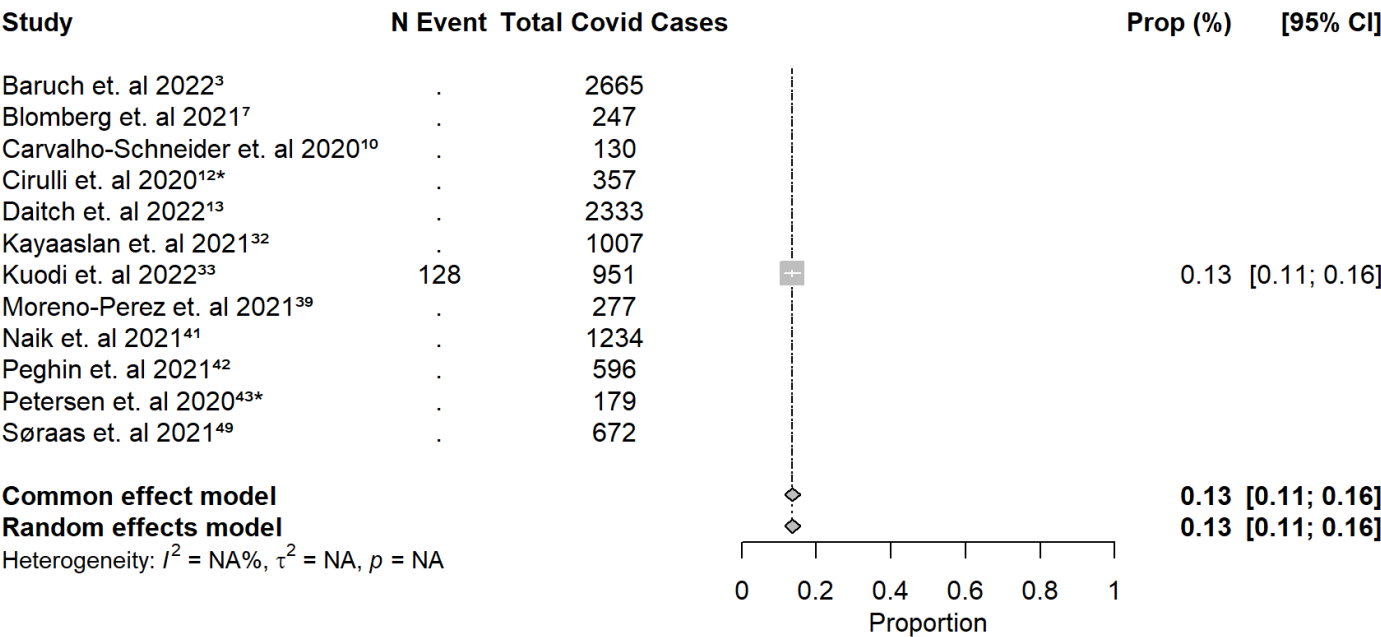

\* indicates value estimated from a figure

# Gi Symptoms Including Abdominal Pain:

Analysis 4  
Gi Symptoms Including Abdominal Pain: hospitalized

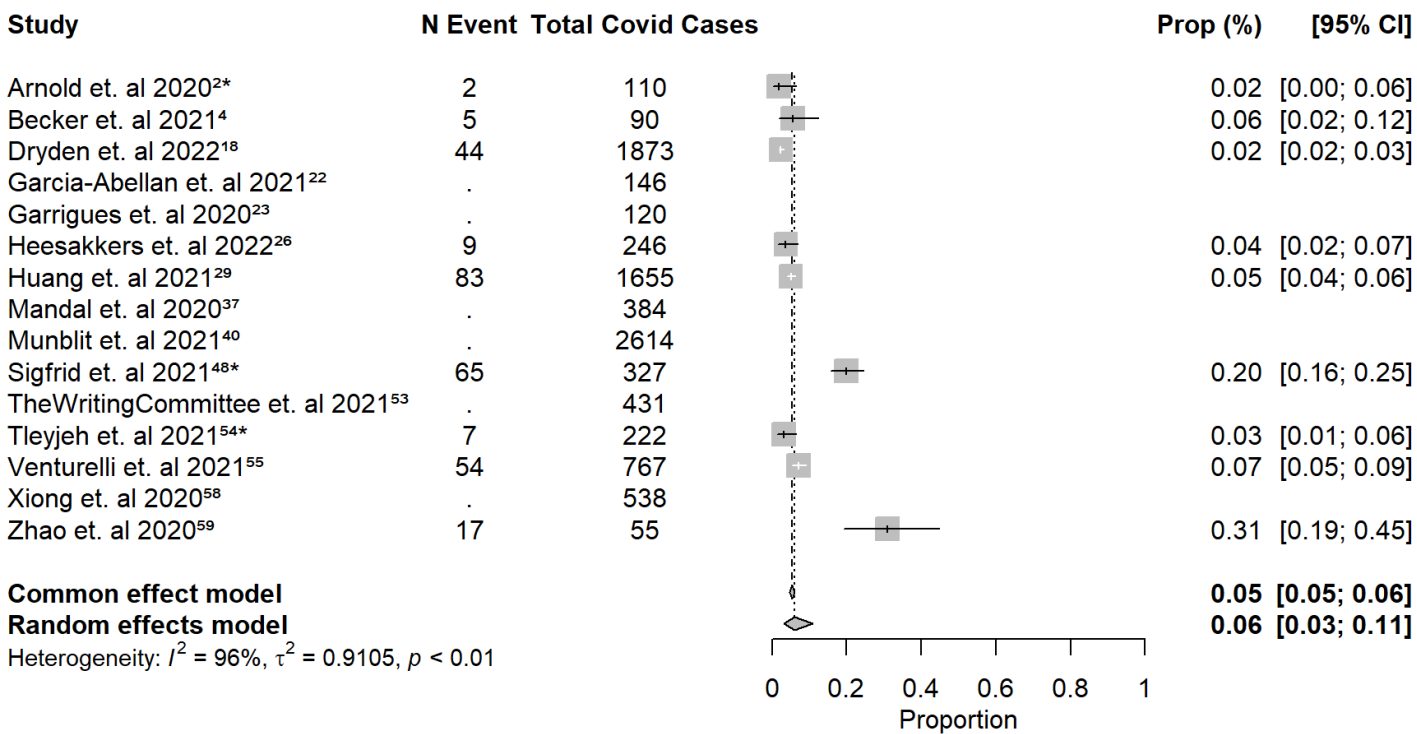

\* indicates value estimated from a figure

Analysis 4

Gi Symptoms Including Abdominal Pain: non-hospitalized and mixed

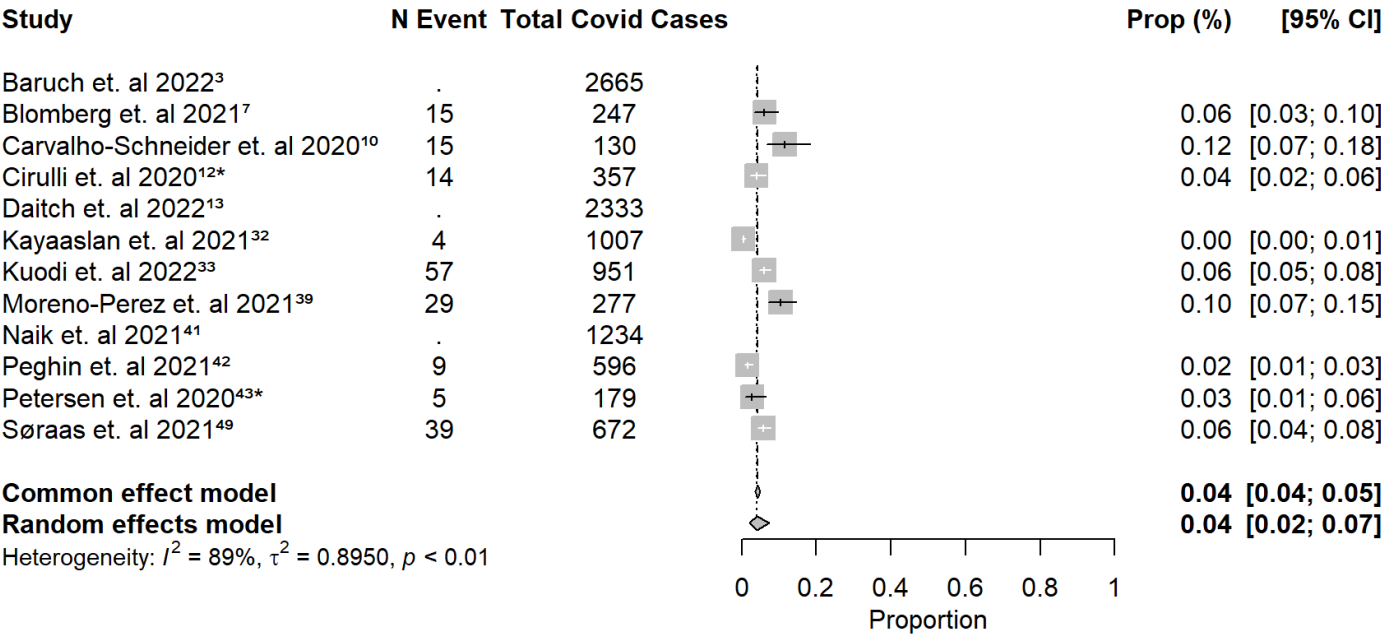

\* indicates value estimated from a figure

Urinary Symptoms:

Analysis 4  
Urinary Symptoms: hospitalized

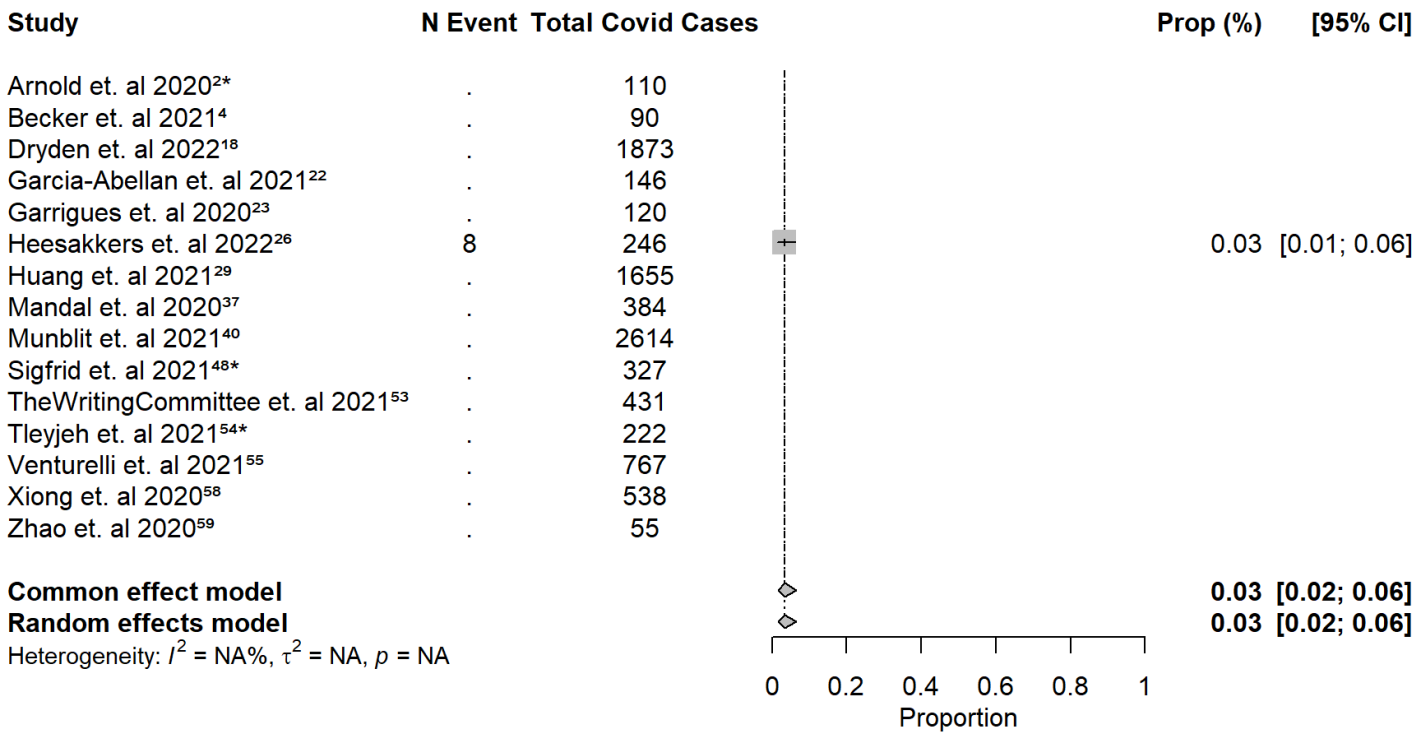

\* indicates value estimated from a figure

Analysis 4

Urinary Symptoms: non-hospitalized and mixed

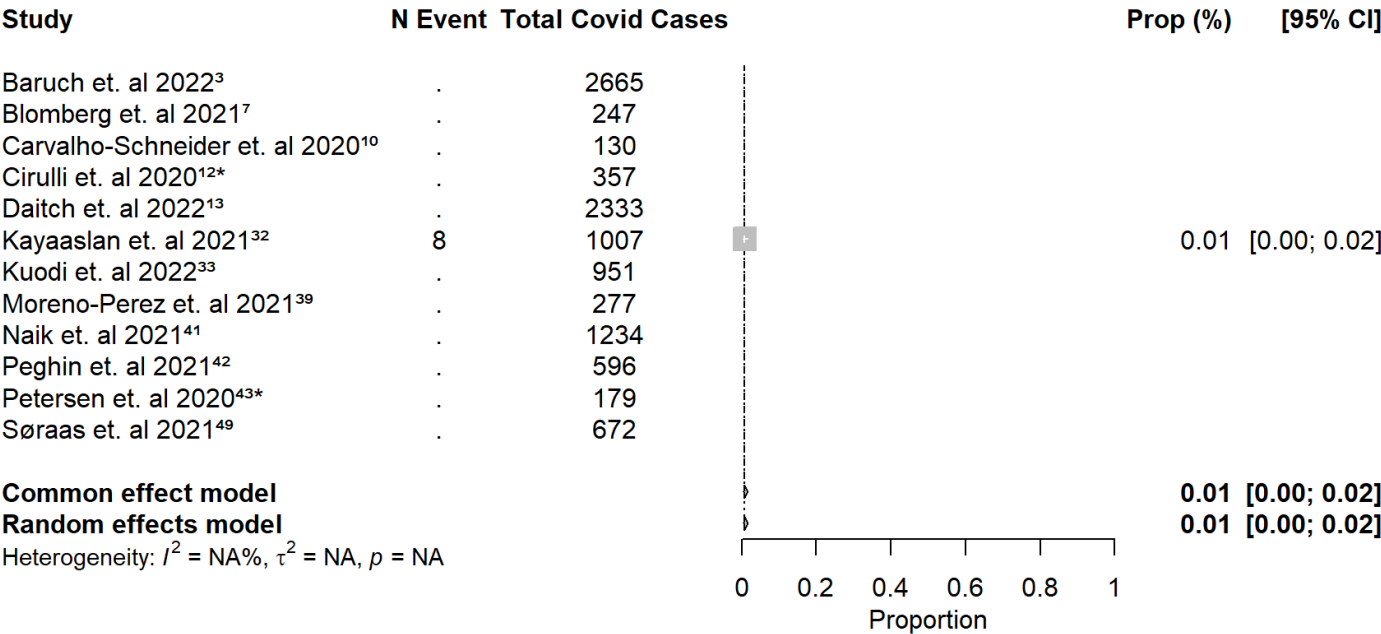

\* indicates value estimated from a figure

Hair Loss:

Analysis 4  
Hair Loss: hospitalized

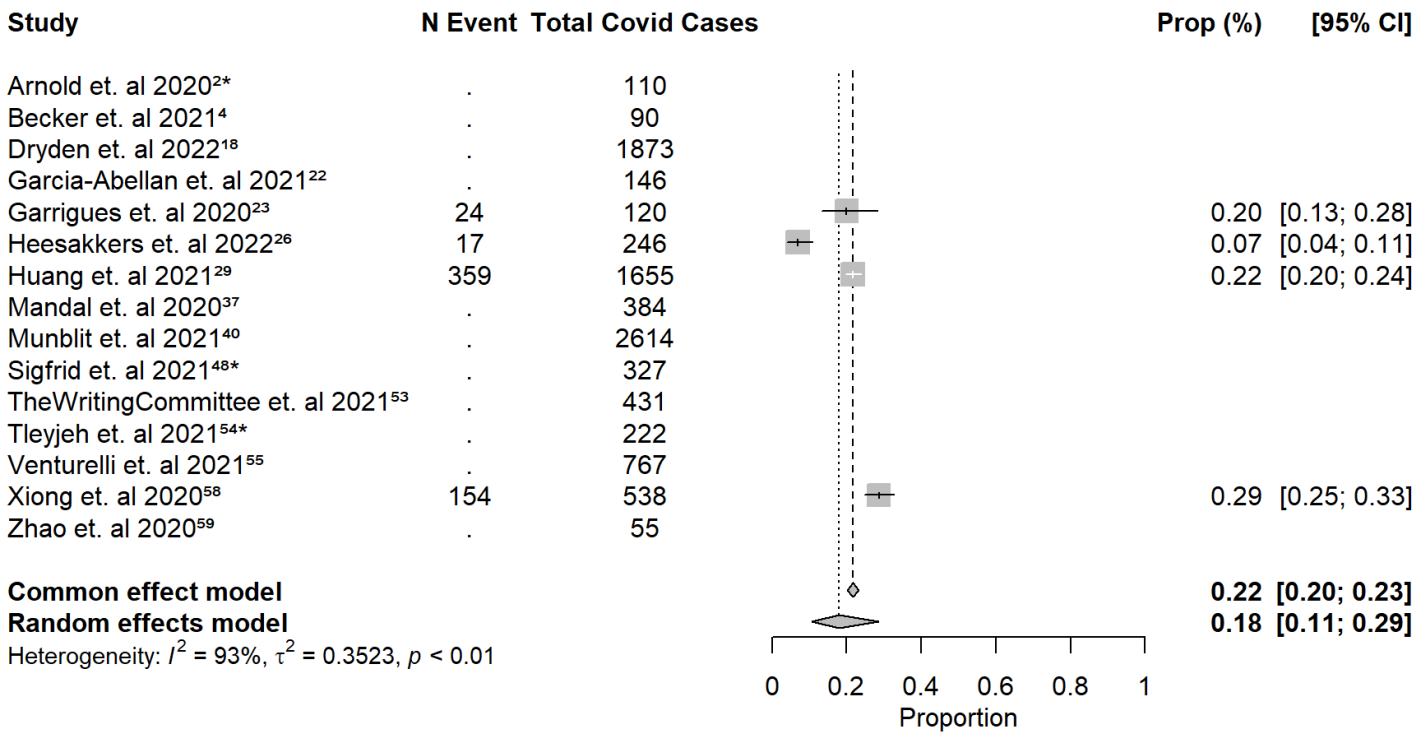

\* indicates value estimated from a figure

Analysis 4

Hair Loss: non-hospitalized and mixed

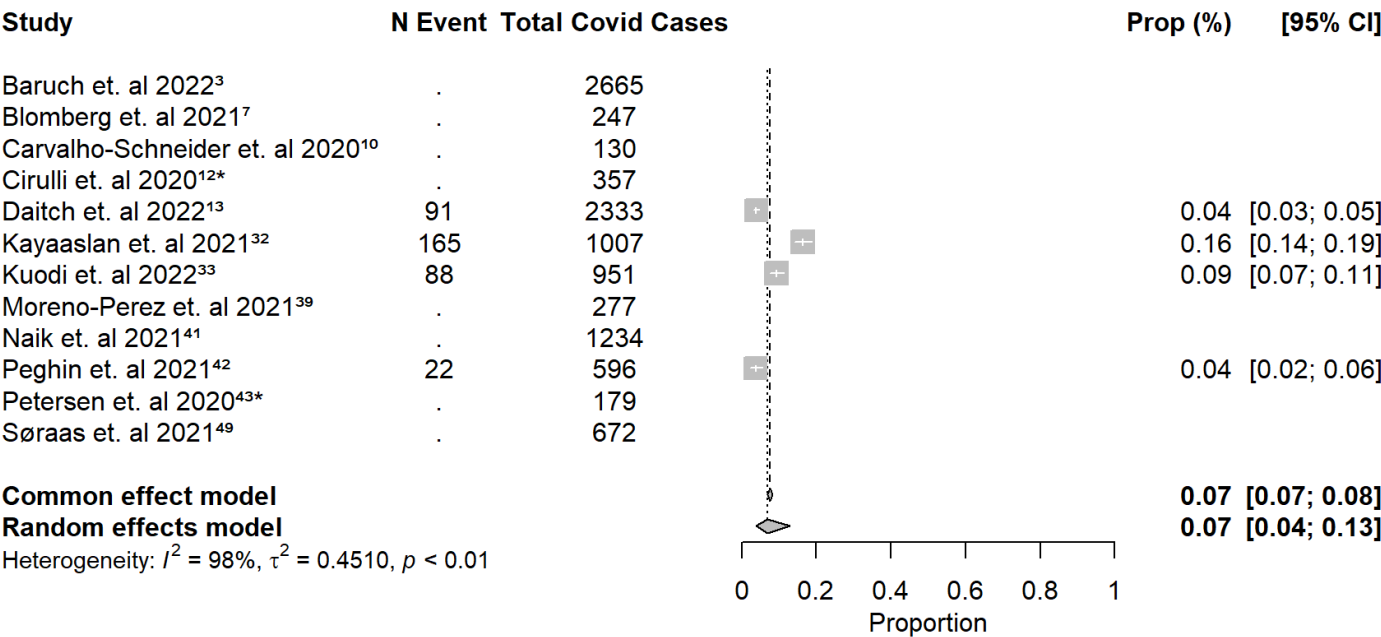

\* indicates value estimated from a figure



Skin Rash:

Analysis 4  
Skin Rash: hospitalized

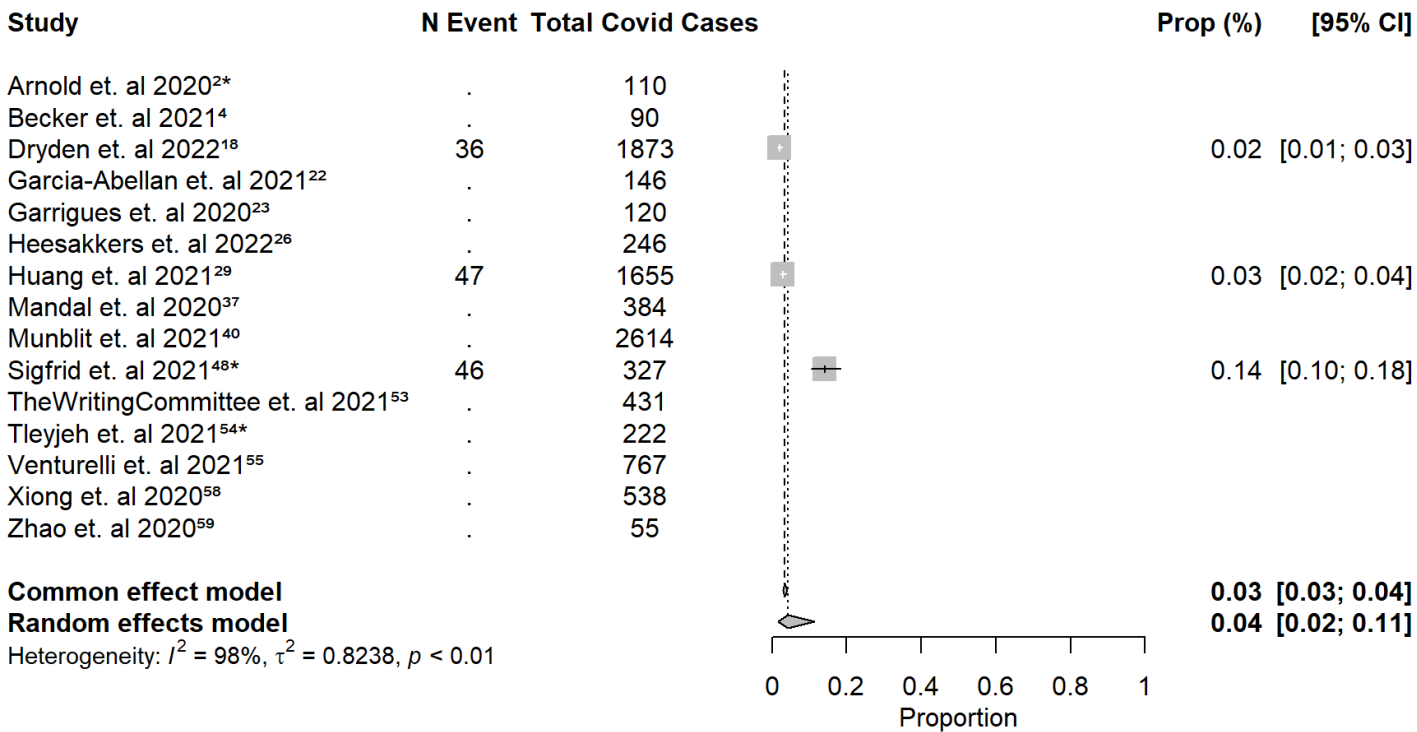

\* indicates value estimated from a figure

Analysis 4

Skin Rash: non-hospitalized and mixed

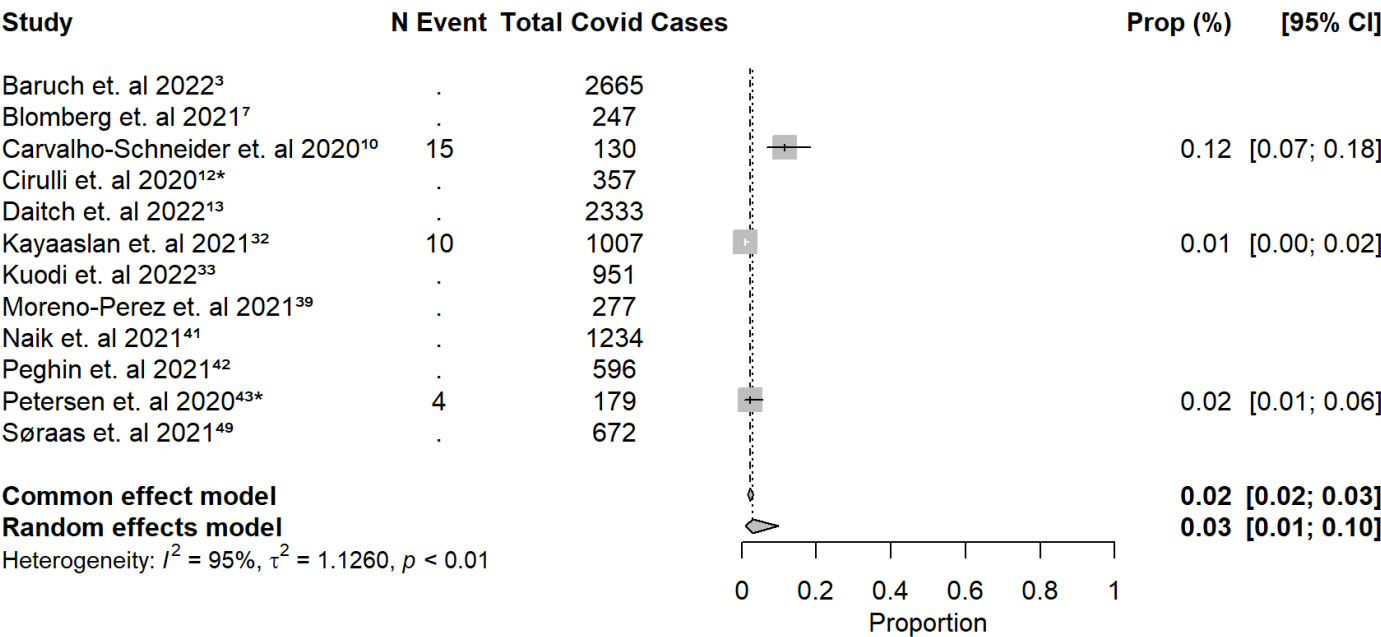

\* indicates value estimated from a figure

# Hearing Problems:

## Analysis 4 Hearing Problems: hospitalized

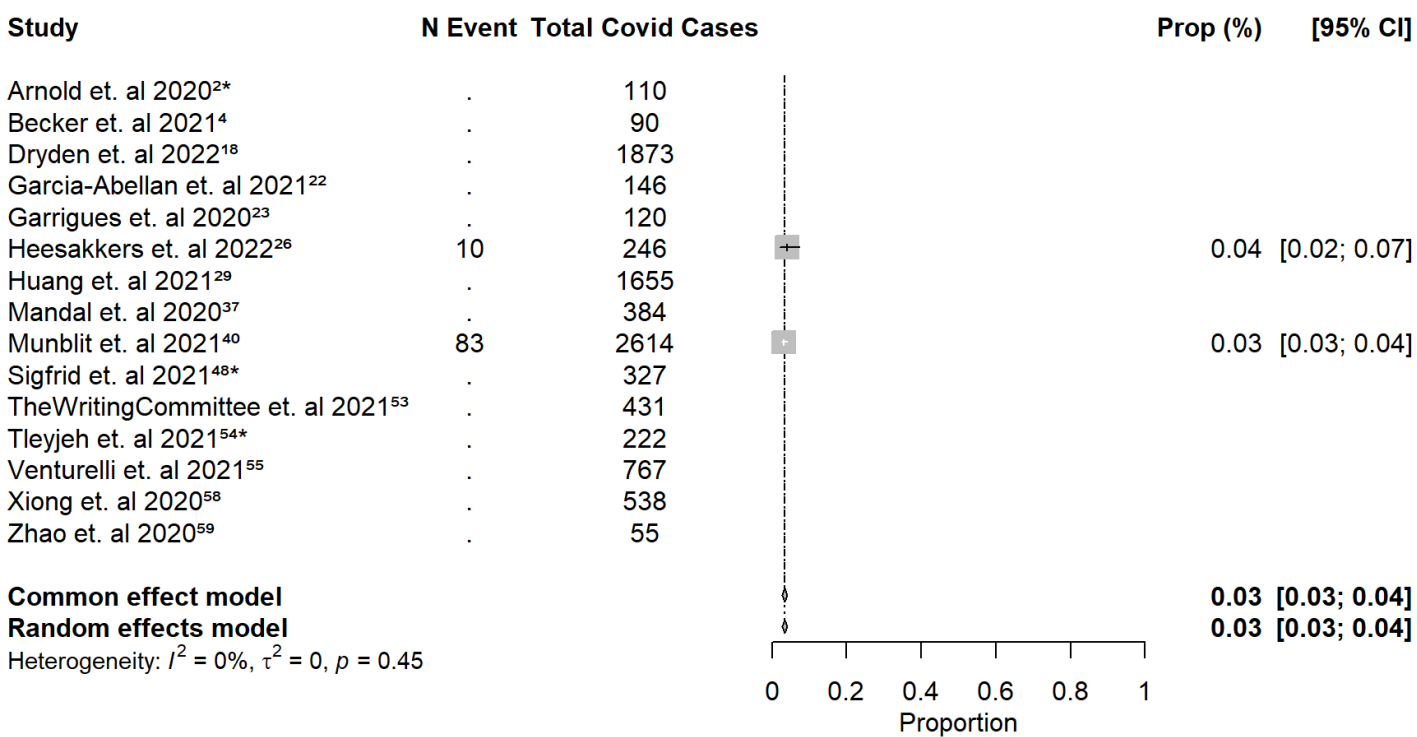

\* indicates value estimated from a figure

Analysis 4

Hearing Problems: non-hospitalized and mixed

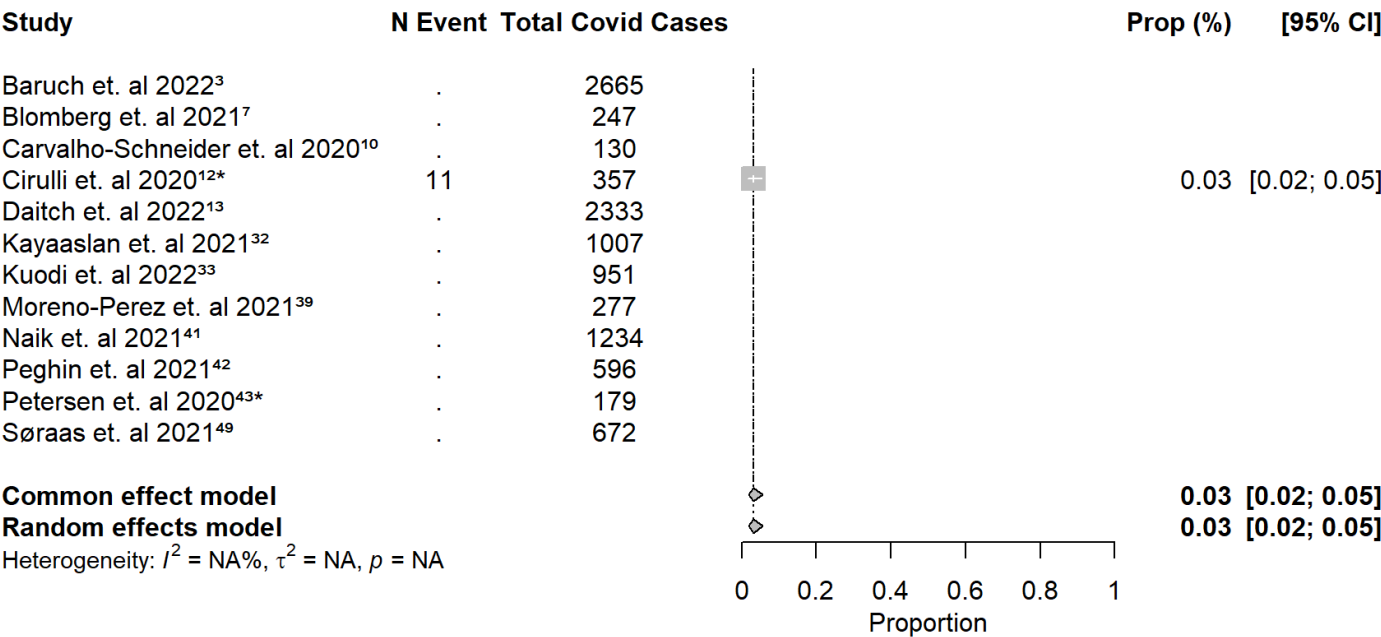

\* indicates value estimated from a figure

Vision Problems:

Analysis 4  
Vision Problems: hospitalized

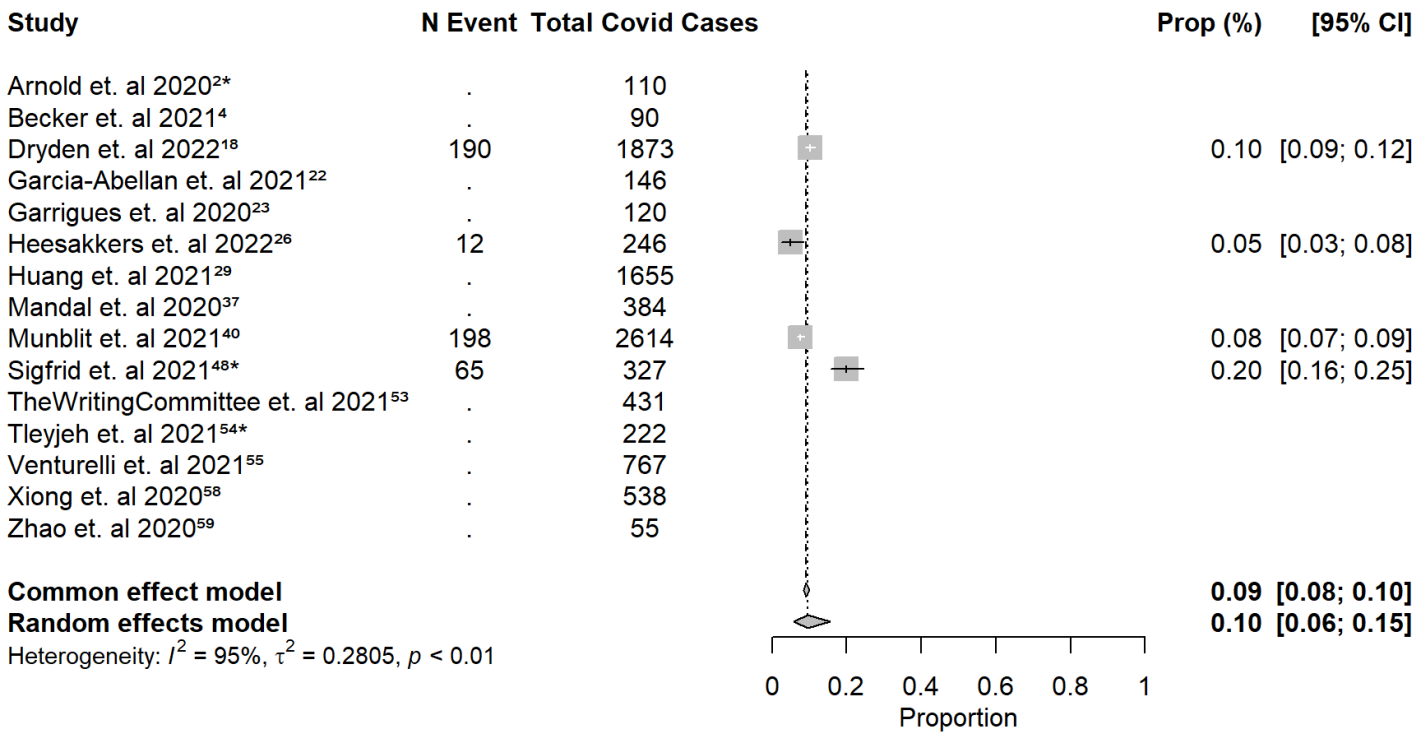

\* indicates value estimated from a figure
